# Supplementary material
Source: Research Square preprint supplement (doi:10.21203/rs.3.rs-8995976/v1)
Supplement: Supplementary file 1 [file 0409d2af330a23b0814c42bd.xlsx]

## Sheet: Sheet 1
baseMean	log2FoldChange	lfcSE	stat	pvalue	padj	ensembl	external_gene_name
93.272	10.388	2.15424	4.8221	1.42052e-06	4.70776e-06	ENSNFUG00015011839
124.694	9.26333	1.42635	6.49443	8.33476e-11	4.68697e-10	ENSNFUG00015020032	mymk
75.5068	9.11244	0.856046	10.6448	1.84379e-26	3.92149e-25	ENSNFUG00015020474
193.962	8.41298	0.499215	16.8524	1.00676e-63	1.14978e-61	ENSNFUG00015023473	gabrr3a
387.37	8.27994	0.429997	19.2558	1.26203e-82	2.6721e-80	ENSNFUG00015017439	GNB5
105.263	8.19847	1.34971	6.07426	1.2456e-09	6.10141e-09	ENSNFUG00015008983
64.5833	7.17526	0.575924	12.4587	1.25402e-35	4.70148e-34	ENSNFUG00015002412	dusp3b
64.6491	7.15392	0.571679	12.5139	6.26946e-36	2.3867e-34	ENSNFUG00015007891	glmnb
171.981	6.9425	0.91984	7.54751	4.43668e-14	3.44762e-13	ENSNFUG00015016314
86.0902	6.85327	0.602468	11.3753	5.55043e-30	1.51583e-28	ENSNFUG00015024587	gna14a
209.63	6.73639	0.602017	11.1897	4.57954e-29	1.17251e-27	ENSNFUG00015006722	frmd5a
166.841	6.7233	0.464025	14.4891	1.42006e-47	9.52297e-46	ENSNFUG00015020181	slc22a13b
1836.39	6.60899	0.189755	34.829	8.854e-266	2.3835e-262	ENSNFUG00015015058	cntn1b
546.664	6.58842	0.246569	26.7204	2.72931e-157	2.33778e-154	ENSNFUG00015007847	slc22a7b.2
76.0898	6.4598	0.643674	10.0358	1.06067e-23	1.88381e-22	ENSNFUG00015005031	lrrc4ba
58.9192	6.42311	0.553656	11.6013	4.06024e-31	1.21254e-29	ENSNFUG00015009881	cabp5a
87.6192	6.41467	0.562002	11.4139	3.56198e-30	9.87088e-29	ENSNFUG00015014456
664.29	6.37367	0.662932	9.61437	6.95364e-22	1.06446e-20	ENSNFUG00015022546	ARHGAP40
189.467	6.24322	0.350929	17.7905	8.3674e-71	1.25139e-68	ENSNFUG00015000905
65.0486	6.22263	1.2223	5.09093	3.56319e-07	1.2905e-06	ENSNFUG00015017121	CLDN14
70.5043	6.17386	0.645412	9.56576	1.11382e-21	1.66182e-20	ENSNFUG00015015433	fscn2b
243.833	6.14442	0.869491	7.06669	1.58676e-12	1.06598e-11	ENSNFUG00015007820
130.637	6.13193	0.300811	20.3847	2.28766e-92	5.74783e-90	ENSNFUG00015024949
132.312	6.11895	0.476821	12.8328	1.07395e-37	4.49721e-36	ENSNFUG00015017733	rcvrn3
253.698	6.05773	0.299982	20.1936	1.11392e-90	2.65706e-88	ENSNFUG00015021229	cpb2
60.9173	5.95961	0.489487	12.1752	4.21264e-34	1.46463e-32	ENSNFUG00015011364	cd59a
285.877	5.90715	0.751872	7.85658	3.9476e-15	3.38437e-14	ENSNFUG00015005529
56.1693	5.83942	0.419287	13.927	4.33915e-44	2.4703e-42	ENSNFUG00015013971	ugt5d1
547.892	5.78435	0.225068	25.7004	1.15581e-145	8.37697e-143	ENSNFUG00015005244	krt97
87.2109	5.59949	0.372324	15.0393	4.05805e-51	3.15992e-49	ENSNFUG00015013050	cacna2d3
357.348	5.53608	0.638775	8.66672	4.44757e-18	4.94163e-17	ENSNFUG00015018923
71.8644	5.51285	0.324857	16.9701	1.36705e-64	1.63043e-62	ENSNFUG00015024662	slc12a5b
376.985	5.51013	0.200715	27.4525	6.48883e-166	5.82264e-163	ENSNFUG00015019595
695.053	5.48211	0.219259	25.0029	5.6814e-138	3.56868e-135	ENSNFUG00015011150
724.39	5.46525	0.567543	9.62966	5.99298e-22	9.22645e-21	ENSNFUG00015005605
991.121	5.34634	0.137651	38.8397	0	0	ENSNFUG00015021771	RAB3A
68.5458	5.30948	0.914019	5.80893	6.28728e-09	2.8371e-08	ENSNFUG00015011546	msc
74.2457	5.30539	0.341199	15.5492	1.61022e-54	1.4113e-52	ENSNFUG00015022097	TMEM158
402.408	5.25336	0.189424	27.7334	2.76707e-169	2.60713e-166	ENSNFUG00015021407	antxr2b
655.973	5.24963	0.134186	39.1219	0	0	ENSNFUG00015003550
78.6202	5.21349	0.839076	6.21338	5.18578e-10	2.66342e-09	ENSNFUG00015002021
1151.49	5.14842	0.529319	9.72651	2.3244e-22	3.70568e-21	ENSNFUG00015003039
89.5165	5.1058	0.589186	8.66586	4.48111e-18	4.97011e-17	ENSNFUG00015022430
102.675	5.04874	0.858461	5.88116	4.07405e-09	1.87705e-08	ENSNFUG00015007824
193.78	5.04764	0.810314	6.22924	4.687e-10	2.4211e-09	ENSNFUG00015007620
93.7956	5.00775	0.400927	12.4904	8.42008e-36	3.19252e-34	ENSNFUG00015006710	trim54
215.683	4.99721	0.491871	10.1596	3.00325e-24	5.49982e-23	ENSNFUG00015012267
60.6737	4.98805	0.312374	15.9682	2.12825e-57	2.04616e-55	ENSNFUG00015007589	fam83b
70.1914	4.95809	0.525343	9.43782	3.80622e-21	5.45124e-20	ENSNFUG00015003825
295.077	4.951	0.21369	23.1691	9.33427e-119	4.29012e-116	ENSNFUG00015008647	poli
74.7207	4.82352	0.982418	4.90985	9.11479e-07	3.11327e-06	ENSNFUG00015007361
1305.8	4.81124	0.829441	5.80058	6.60862e-09	2.97214e-08	ENSNFUG00015017177	steap4
151.97	4.78917	0.263923	18.1461	1.37861e-73	2.25901e-71	ENSNFUG00015014636
64.479	4.76833	0.783742	6.08406	1.17179e-09	5.76384e-09	ENSNFUG00015020483
53.553	4.73724	0.440914	10.7441	6.31589e-27	1.39364e-25	ENSNFUG00015000041
155.831	4.72943	0.266402	17.753	1.63436e-70	2.42503e-68	ENSNFUG00015013816	nkx1.2lb
324.673	4.6578	0.513094	9.07788	1.10715e-19	1.40209e-18	ENSNFUG00015007488	acy3.1
60.8502	4.63373	0.768014	6.0334	1.60547e-09	7.76727e-09	ENSNFUG00015024119	p2rx2
151.6	4.62577	0.292392	15.8205	2.2484e-56	2.0769e-54	ENSNFUG00015016162
66.5453	4.55363	0.341081	13.3506	1.17535e-40	5.76779e-39	ENSNFUG00015003625	clcf1
160.021	4.50172	0.196454	22.9148	3.30624e-116	1.32559e-113	ENSNFUG00015010191	ecel1
383.928	4.48057	0.461311	9.71268	2.66245e-22	4.21606e-21	ENSNFUG00015024327	inpp5kb
137.122	4.3947	0.369314	11.8996	1.18857e-32	3.88844e-31	ENSNFUG00015011331
3001.19	4.33689	0.141887	30.5658	3.48679e-205	4.69321e-202	ENSNFUG00015003751	gpcpd1
66.2973	4.31725	0.555933	7.76577	8.11523e-15	6.75159e-14	ENSNFUG00015007172
169.391	4.24273	0.226947	18.6948	5.45949e-78	1.04978e-75	ENSNFUG00015004464	cd276
546.885	4.21457	0.18112	23.2695	9.0345e-120	4.25615e-117	ENSNFUG00015020974	cep19
211.301	4.13519	0.228856	18.0689	5.59838e-73	8.8652e-71	ENSNFUG00015019730	saga
174.802	4.12314	0.583631	7.06463	1.61039e-12	1.08109e-11	ENSNFUG00015008595	hk3
59.5957	4.12254	1.03041	4.00088	6.31066e-05	0.000164206	ENSNFUG00015009172
76.2019	4.03526	0.410433	9.83171	8.22071e-23	1.35058e-21	ENSNFUG00015012362	fzd8b
512.705	4.00906	0.488176	8.21233	2.1694e-16	2.06779e-15	ENSNFUG00015009718
443.554	3.98853	0.121582	32.8053	4.95041e-236	9.32855e-233	ENSNFUG00015018089	si:dkeyp-19e1.3
131.605	3.94815	0.222959	17.708	3.64085e-70	5.36001e-68	ENSNFUG00015001373	syt14b
1146.38	3.94615	0.241448	16.3437	4.82533e-60	4.88863e-58	ENSNFUG00015022561
150.393	3.92278	0.302224	12.9797	1.59496e-38	7.03872e-37	ENSNFUG00015021221	ctdspla
445.876	3.91338	0.309713	12.6355	1.34548e-36	5.24934e-35	ENSNFUG00015018375	got1
99.6629	3.90548	0.269236	14.5058	1.11333e-47	7.62892e-46	ENSNFUG00015007252
102.354	3.88875	0.389527	9.98324	1.80475e-23	3.14313e-22	ENSNFUG00015002433	slc47a3
173.062	3.88582	0.288107	13.4874	1.85501e-41	9.42203e-40	ENSNFUG00015013424	Nfu_g_1_013830
57.0631	3.87161	0.254774	15.1963	3.74244e-52	3.05292e-50	ENSNFUG00015024005
427.742	3.82411	0.522567	7.31793	2.5183e-13	1.8078e-12	ENSNFUG00015018516	gpnmb
690.84	3.81083	0.227609	16.7429	6.38472e-63	6.95455e-61	ENSNFUG00015000241	zgc:175214
92.1422	3.791	0.467142	8.11529	4.84613e-16	4.4743e-15	ENSNFUG00015013589	alox5ap
124.733	3.7873	0.373679	10.1352	3.85671e-24	7.03542e-23	ENSNFUG00015024057
194.848	3.74838	0.740739	5.06032	4.1855e-07	1.5026e-06	ENSNFUG00015016640
984.693	3.70979	0.322616	11.4991	1.33299e-30	3.81745e-29	ENSNFUG00015015773	cebpb
100.22	3.6881	0.487758	7.56132	3.98992e-14	3.11343e-13	ENSNFUG00015005425	tyrp1a
981.046	3.67216	0.524824	6.99694	2.61618e-12	1.72737e-11	ENSNFUG00015001764	qdpra
107.814	3.66674	0.654114	5.60567	2.07452e-08	8.77295e-08	ENSNFUG00015010762	ppp1r14aa
51.6447	3.61554	0.319789	11.306	1.22528e-29	3.27043e-28	ENSNFUG00015002002	abcg8
236.275	3.61365	0.474038	7.62312	2.47615e-14	1.97714e-13	ENSNFUG00015012644	Nfu_g_1_012109
4613.34	3.60855	0.212438	16.9864	1.03607e-64	1.25152e-62	ENSNFUG00015001509	apoeb
194.604	3.58873	0.336402	10.668	1.43717e-26	3.08452e-25	ENSNFUG00015021650	sema3e
243.925	3.56449	0.270594	13.1728	1.25796e-39	5.91149e-38	ENSNFUG00015018481	syne2b
341.863	3.56077	0.1543	23.0769	7.89797e-118	3.54356e-115	ENSNFUG00015002661	slc1a3b
136.508	3.55266	0.291982	12.1674	4.63776e-34	1.60651e-32	ENSNFUG00015010803	gys2
153.89	3.51292	0.520839	6.74474	1.53305e-11	9.36125e-11	ENSNFUG00015009541	gpr84
59.6289	3.50377	0.355426	9.85796	6.33202e-23	1.05407e-21	ENSNFUG00015015912	fam20a
410.662	3.4986	0.172743	20.2532	3.332e-91	8.04978e-89	ENSNFUG00015001603	slc2a15a
901.061	3.47106	0.191785	18.0987	3.26207e-73	5.25388e-71	ENSNFUG00015023142
86.5958	3.44702	0.253325	13.6071	3.63489e-42	1.91865e-40	ENSNFUG00015018440	grik1a
355.498	3.43676	0.191454	17.9509	4.72511e-72	7.35867e-70	ENSNFUG00015015176
60.999	3.43641	0.578212	5.94317	2.79564e-09	1.31309e-08	ENSNFUG00015014552	crym
66.6405	3.37914	0.280424	12.0501	1.93697e-33	6.50627e-32	ENSNFUG00015013090	SNX4
90.6809	3.37072	0.486635	6.92659	4.31113e-12	2.78501e-11	ENSNFUG00015006356	OXER1
227.901	3.36381	0.209454	16.0599	4.87206e-58	4.73243e-56	ENSNFUG00015002902	grik5
513.163	3.33902	0.182292	18.3169	6.06559e-75	1.03909e-72	ENSNFUG00015009092
94.6282	3.30462	0.394487	8.37702	5.42851e-17	5.52049e-16	ENSNFUG00015024468	slc41a2a
1896.68	3.28176	0.424765	7.72605	1.10931e-14	9.12432e-14	ENSNFUG00015014875
110.404	3.27214	0.351257	9.3155	1.21374e-20	1.67558e-19	ENSNFUG00015018038	rrh
417.399	3.26387	0.422345	7.72797	1.09273e-14	8.99977e-14	ENSNFUG00015023573
287.221	3.25243	0.49843	6.52534	6.78461e-11	3.8532e-10	ENSNFUG00015019009
88.8449	3.23023	0.638383	5.06001	4.19227e-07	1.50446e-06	ENSNFUG00015003926	ntrk2b
149.983	3.22873	0.363941	8.87157	7.21236e-19	8.53168e-18	ENSNFUG00015017781	RASGEF1B
153.545	3.20558	0.211826	15.1331	9.7983e-52	7.82369e-50	ENSNFUG00015009134
99.4475	3.19986	0.448004	7.14248	9.16593e-13	6.26488e-12	ENSNFUG00015014191	acod1
73.3166	3.18788	0.400022	7.96926	1.59622e-15	1.41084e-14	ENSNFUG00015023735	adgrl1a
211.412	3.18677	0.2864	11.127	9.26871e-29	2.30726e-27	ENSNFUG00015022987	nr1d4b
285.476	3.18601	0.204991	15.5422	1.7984e-54	1.55455e-52	ENSNFUG00015009369
630.459	3.18521	0.774496	4.11262	3.91199e-05	0.000105401	ENSNFUG00015006349	MFAP4
94.4615	3.18222	0.29181	10.9051	1.08984e-27	2.5417e-26	ENSNFUG00015023074
187.44	3.16882	0.250727	12.6385	1.29431e-36	5.06015e-35	ENSNFUG00015005511	tnca
71.6833	3.11057	0.361244	8.6107	7.26147e-18	7.92788e-17	ENSNFUG00015003181
75.3251	3.10818	0.369075	8.42156	3.71507e-17	3.8381e-16	ENSNFUG00015017352	FILIP1L
97.3508	3.09978	0.219713	14.1083	3.37573e-45	2.07883e-43	ENSNFUG00015025162	grid1b
77.6257	3.0811	0.176834	17.4237	5.45744e-68	7.24225e-66	ENSNFUG00015019057
298.19	3.07877	0.18803	16.3738	2.94219e-60	2.9969e-58	ENSNFUG00015014411	Nfu_g_1_012687
72.8209	3.0648	0.257664	11.8946	1.26277e-32	4.0886e-31	ENSNFUG00015013625	myt1la
252.691	3.06387	0.22621	13.5444	8.55079e-42	4.45113e-40	ENSNFUG00015010556	b3gnt5b
129.262	3.06003	0.281047	10.8879	1.31587e-27	3.03132e-26	ENSNFUG00015015766	cps1
215.378	3.05613	0.184455	16.5685	1.17772e-61	1.26096e-59	ENSNFUG00015016478	slc25a48
449.388	3.03433	0.123891	24.4919	1.80228e-132	1.02916e-129	ENSNFUG00015004014	asb13a.1
187.227	3.03052	0.409755	7.39592	1.4043e-13	1.03694e-12	ENSNFUG00015017295	cmklr1
526.196	3.01586	0.465995	6.47188	9.67933e-11	5.40276e-10	ENSNFUG00015005643	cybb
153.472	2.99598	0.169985	17.6249	1.58537e-69	2.28052e-67	ENSNFUG00015018949	ARSI
407.255	2.98463	0.531958	5.61065	2.01563e-08	8.53156e-08	ENSNFUG00015010583
53.2362	2.98156	0.5622	5.30338	1.13677e-07	4.38869e-07	ENSNFUG00015010830	pnp5a
139.557	2.93188	0.614202	4.77347	1.8108e-06	5.90666e-06	ENSNFUG00015008007	lect2.2
56.4087	2.92441	0.348891	8.382	5.20349e-17	5.30025e-16	ENSNFUG00015013643	agxta
127.097	2.9217	0.352217	8.29519	1.08414e-16	1.06738e-15	ENSNFUG00015011280	nos1
58.616	2.91134	0.641237	4.54019	5.6204e-06	1.70879e-05	ENSNFUG00015004243	map1lc3cl
604.193	2.90943	0.201394	14.4465	2.63924e-47	1.74504e-45	ENSNFUG00015007278
621.314	2.90544	0.251139	11.569	5.9149e-31	1.74977e-29	ENSNFUG00015004968
638.285	2.89973	0.259333	11.1815	5.02396e-29	1.28107e-27	ENSNFUG00015006273	cftr
391.067	2.89114	0.585896	4.93456	8.03296e-07	2.76885e-06	ENSNFUG00015014706
167.704	2.89019	0.274103	10.5441	5.40639e-26	1.11221e-24	ENSNFUG00015008593
134.465	2.88582	0.194125	14.8658	5.49675e-50	4.0941e-48	ENSNFUG00015014715
212.094	2.8794	0.304915	9.44327	3.61333e-21	5.19768e-20	ENSNFUG00015018682
52.183	2.87869	0.312966	9.19809	3.64358e-20	4.842e-19	ENSNFUG00015014492	si:dkey-266j7.2
293.812	2.86904	0.472653	6.07008	1.27848e-09	6.25046e-09	ENSNFUG00015014700
95.73	2.86868	0.332847	8.61864	6.77536e-18	7.42728e-17	ENSNFUG00015010560	zgc:152891
216.113	2.8644	0.364149	7.86602	3.66109e-15	3.15021e-14	ENSNFUG00015003119
327.644	2.86411	0.167829	17.0656	2.6773e-65	3.27605e-63	ENSNFUG00015011275	map3k15
65.8141	2.8598	0.226243	12.6404	1.26412e-36	4.96272e-35	ENSNFUG00015003074
1038.84	2.85879	0.312291	9.15425	5.47372e-20	7.14808e-19	ENSNFUG00015024763	cfap210
337.401	2.85767	0.182697	15.6416	3.78943e-55	3.41666e-53	ENSNFUG00015008546	hspbap1
93.6376	2.82785	0.223731	12.6395	1.27886e-36	5.01014e-35	ENSNFUG00015001658	slc2a3b
194.198	2.82134	0.214682	13.1419	1.89306e-39	8.74332e-38	ENSNFUG00015025426	TMEM47
261.279	2.81778	0.266572	10.5704	4.08648e-26	8.47147e-25	ENSNFUG00015005713	camkvl
58.6415	2.80854	0.350945	8.00279	1.2163e-15	1.08471e-14	ENSNFUG00015008261	DLK1
104.342	2.80638	0.275696	10.1793	2.4541e-24	4.5294e-23	ENSNFUG00015011889	slc23a1
545.694	2.8014	0.285913	9.79809	1.14731e-22	1.87023e-21	ENSNFUG00015019120	klf9
1661.36	2.79887	0.438642	6.38076	1.76213e-10	9.57485e-10	ENSNFUG00015016623	mpx
131.958	2.79807	0.235212	11.8959	1.24237e-32	4.03642e-31	ENSNFUG00015021730	cables2b
160.258	2.7972	0.574221	4.87129	1.1087e-06	3.73346e-06	ENSNFUG00015016540
60.7948	2.78652	0.219913	12.671	8.56462e-37	3.41208e-35	ENSNFUG00015009336
472.045	2.7663	0.357276	7.74275	9.72877e-15	8.03369e-14	ENSNFUG00015014419	hecw2a
364.265	2.76519	0.110392	25.0487	1.80438e-138	1.17247e-135	ENSNFUG00015014701
117.476	2.7602	0.28605	9.64937	4.94576e-22	7.64545e-21	ENSNFUG00015022849	nt5c1ab
760.286	2.73184	0.410791	6.6502	2.92696e-11	1.72577e-10	ENSNFUG00015020436
307.914	2.73171	0.180309	15.1502	7.55918e-52	6.13988e-50	ENSNFUG00015013240
77.6846	2.70751	0.212886	12.7181	4.69049e-37	1.89673e-35	ENSNFUG00015010698	RBM20
642.012	2.70592	0.127608	21.2049	8.61157e-100	2.53557e-97	ENSNFUG00015005370	zufsp
137.654	2.70205	0.223587	12.085	1.26774e-33	4.31995e-32	ENSNFUG00015023788	gadd45ba
182.606	2.69488	0.154291	17.4662	2.59371e-68	3.51625e-66	ENSNFUG00015013630	krt1-19d
91.2006	2.68531	0.313799	8.55742	1.15417e-17	1.24281e-16	ENSNFUG00015013418	tcima
2680.59	2.68276	0.197548	13.5803	5.24187e-42	2.74383e-40	ENSNFUG00015018866	zgc:113531
78.0777	2.6815	0.463454	5.7859	7.21241e-09	3.22905e-08	ENSNFUG00015025143	tifa
219.754	2.67746	0.31648	8.46013	2.67081e-17	2.79294e-16	ENSNFUG00015019161
208.195	2.67172	0.503677	5.30444	1.13019e-07	4.3651e-07	ENSNFUG00015024760
63.5382	2.67031	0.290008	9.2077	3.33182e-20	4.43396e-19	ENSNFUG00015006080	FOXA1
76.2117	2.65636	0.321754	8.25587	1.50798e-16	1.46175e-15	ENSNFUG00015006692	OSBPL1A
55.3598	2.65505	0.443909	5.98105	2.21699e-09	1.05604e-08	ENSNFUG00015022858	mmp9
273.06	2.65108	0.484246	5.47466	4.3836e-08	1.78181e-07	ENSNFUG00015008534	ncf1
57.1263	2.65043	0.318289	8.32712	8.28322e-17	8.25833e-16	ENSNFUG00015018148
51.3943	2.64844	0.291871	9.07403	1.14693e-19	1.44858e-18	ENSNFUG00015007459	FOXQ1
62.9424	2.63927	0.231653	11.3932	4.51972e-30	1.24593e-28	ENSNFUG00015000379
1417.81	2.63831	0.207751	12.6994	5.96044e-37	2.37963e-35	ENSNFUG00015008751	PLCB4
103.842	2.62429	0.181832	14.4325	3.23327e-47	2.11555e-45	ENSNFUG00015016040	Nfu_g_1_018478
109.875	2.60828	0.164476	15.8581	1.23487e-56	1.15197e-54	ENSNFUG00015011461	gnmt
68.4115	2.60555	0.463718	5.61882	1.92265e-08	8.1545e-08	ENSNFUG00015004466
170.459	2.59186	0.54892	4.72175	2.33822e-06	7.50363e-06	ENSNFUG00015020528	pros1
296.278	2.58406	0.297722	8.67943	3.97749e-18	4.44291e-17	ENSNFUG00015023775	CXCR4
243.613	2.56468	0.499829	5.13112	2.88028e-07	1.05884e-06	ENSNFUG00015023469	snx10b
146.375	2.56381	0.201068	12.7509	3.0798e-37	1.25347e-35	ENSNFUG00015016677	dhrs12la
360.906	2.55872	0.4579	5.58794	2.29784e-08	9.65451e-08	ENSNFUG00015021759	stoml3b
55.6035	2.55711	0.239988	10.6552	1.64937e-26	3.5239e-25	ENSNFUG00015015630	si:dkeyp-69b9.3
85.9434	2.53541	0.297057	8.5351	1.40033e-17	1.49761e-16	ENSNFUG00015019713	abcc8
319.144	2.52611	0.304983	8.2828	1.20315e-16	1.17716e-15	ENSNFUG00015000838
1154.73	2.5178	0.0904229	27.8447	1.2489e-170	1.23865e-167	ENSNFUG00015003333	irak1bp1
282.987	2.51287	0.296305	8.48067	2.23904e-17	2.35186e-16	ENSNFUG00015005428	KLF2
147.217	2.50996	0.265124	9.4671	2.87709e-21	4.18333e-20	ENSNFUG00015016302	SNAI2
316.396	2.50625	0.142594	17.5761	3.75587e-69	5.28177e-67	ENSNFUG00015007104	Nfu_g_1_016565
88.0116	2.50597	0.185343	13.5207	1.18023e-41	6.07657e-40	ENSNFUG00015010256	stra6
77.8306	2.50398	0.289884	8.63788	5.72634e-18	6.29563e-17	ENSNFUG00015018236	mybpha
166.412	2.50029	0.378297	6.60933	3.86074e-11	2.24959e-10	ENSNFUG00015012765	egr1
226.457	2.49973	0.165086	15.142	8.56063e-52	6.86453e-50	ENSNFUG00015005310
1703.66	2.48936	0.215955	11.5272	9.61929e-31	2.793e-29	ENSNFUG00015019301	THBS1
155.292	2.46101	0.194587	12.6474	1.15705e-36	4.57094e-35	ENSNFUG00015016274
94.1963	2.45547	0.230644	10.6461	1.81732e-26	3.86955e-25	ENSNFUG00015001941	abcg5
74.5851	2.45002	0.163647	14.9714	1.12898e-50	8.68349e-49	ENSNFUG00015014815
120.595	2.4451	0.222855	10.9717	5.22691e-28	1.24521e-26	ENSNFUG00015000875	si:ch1073-416j23.1
115.682	2.44055	0.202332	12.0621	1.67439e-33	5.66468e-32	ENSNFUG00015015905
202.134	2.4405	0.218397	11.1746	5.42891e-29	1.38246e-27	ENSNFUG00015001559
184.467	2.43802	0.142546	17.1034	1.3991e-65	1.76944e-63	ENSNFUG00015002199	dpf3
581.596	2.42786	0.289033	8.39993	4.46762e-17	4.58789e-16	ENSNFUG00015012740	CSF3R
88.1459	2.42282	0.334523	7.24261	4.40137e-13	3.07753e-12	ENSNFUG00015015093	gfra1a
1614.92	2.4222	0.195675	12.3787	3.40875e-35	1.25703e-33	ENSNFUG00015005142	ip6k2a
868.384	2.41297	0.152091	15.8653	1.10237e-56	1.03349e-54	ENSNFUG00015010484
379.624	2.41253	0.114304	21.1063	6.96665e-99	1.98908e-96	ENSNFUG00015000099
1295.45	2.40723	0.214489	11.2231	3.14067e-29	8.1519e-28	ENSNFUG00015001971	zgc:162730
1027.25	2.40585	0.185259	12.9864	1.46126e-38	6.47906e-37	ENSNFUG00015001391	si:ch211-79k12.1
143.593	2.39853	0.262663	9.13158	6.75062e-20	8.75489e-19	ENSNFUG00015024613	rapgef4b
283.026	2.3928	0.242797	9.85515	6.51166e-23	1.08111e-21	ENSNFUG00015007198	bhlhe40
58.0266	2.39078	0.417001	5.73328	9.85066e-09	4.32997e-08	ENSNFUG00015023543
414.078	2.38967	0.224013	10.6675	1.44394e-26	3.09552e-25	ENSNFUG00015016297	ITGA11
135.194	2.3891	0.325321	7.34384	2.07559e-13	1.50432e-12	ENSNFUG00015012364
460.509	2.37367	0.444565	5.3393	9.3306e-08	3.63878e-07	ENSNFUG00015014398
53.6536	2.37091	0.35133	6.7484	1.49489e-11	9.13412e-11	ENSNFUG00015003089	si:ch211-152f2.1
261.529	2.36801	0.222329	10.651	1.72592e-26	3.68328e-25	ENSNFUG00015015699	rhogb
16302.4	2.36712	0.171353	13.8143	2.08879e-43	1.16799e-41	ENSNFUG00015009674
95.9679	2.36223	0.395042	5.97969	2.23562e-09	1.06464e-08	ENSNFUG00015013498	rxfp2a
459.256	2.35731	0.129296	18.232	2.87827e-74	4.84269e-72	ENSNFUG00015022727
53.2893	2.35466	0.326667	7.20813	5.67242e-13	3.93561e-12	ENSNFUG00015006880	c1qtnf9
97.7968	2.35219	0.302946	7.76437	8.20489e-15	6.82316e-14	ENSNFUG00015006486	itga9
633.35	2.34442	0.170554	13.7459	5.38981e-43	2.92696e-41	ENSNFUG00015020704	slc43a2a
755.24	2.34352	0.116577	20.1028	6.98006e-90	1.60405e-87	ENSNFUG00015021715	THSD1
59.0403	2.3397	0.409922	5.70767	1.14536e-08	4.99612e-08	ENSNFUG00015003098	sema4ga
420.751	2.33311	0.366633	6.3636	1.97081e-10	1.06413e-09	ENSNFUG00015014614	MARCO
360.256	2.31567	0.246968	9.37642	6.82488e-21	9.59762e-20	ENSNFUG00015009452	add3b
91.6092	2.31402	0.160225	14.4423	2.80301e-47	1.84685e-45	ENSNFUG00015014615
111.576	2.31004	0.273914	8.43345	3.35612e-17	3.47488e-16	ENSNFUG00015001430	hdac9b
1489.25	2.30946	0.122022	18.9266	6.8914e-80	1.35273e-77	ENSNFUG00015019154
355.097	2.30883	0.222401	10.3814	3.01334e-25	5.88428e-24	ENSNFUG00015001467	dusp1
61.8558	2.30793	0.261183	8.83642	9.8834e-19	1.15967e-17	ENSNFUG00015015696
72.9419	2.30644	0.277545	8.31015	9.55808e-17	9.46963e-16	ENSNFUG00015006059	plek2
1241.14	2.296	0.101437	22.6347	1.9749e-113	7.443e-111	ENSNFUG00015011969	efhc1
65.8563	2.28791	0.1695	13.498	1.60756e-41	8.18726e-40	ENSNFUG00015006639	trpc6b
117.185	2.28658	0.131724	17.3588	1.69288e-67	2.20004e-65	ENSNFUG00015023565	RNF207
74.1924	2.2812	0.597892	3.81541	0.000135957	0.000335865	ENSNFUG00015009023
601.597	2.27916	0.0971648	23.4567	1.12988e-121	5.60301e-119	ENSNFUG00015007791	slc37a4b
1461.97	2.27434	0.102953	22.0911	3.8529e-108	1.2965e-105	ENSNFUG00015014207	si:dkey-90l8.3
288.269	2.26962	0.519899	4.3655	1.26833e-05	3.67756e-05	ENSNFUG00015015383	c7b
378.286	2.26366	0.290341	7.79657	6.36109e-15	5.33697e-14	ENSNFUG00015002643	arrdc3b
99.8829	2.26258	0.272869	8.29181	1.11541e-16	1.09587e-15	ENSNFUG00015023382	mical1
64.6037	2.25711	0.26712	8.44979	2.91831e-17	3.03995e-16	ENSNFUG00015020702	fam49al
77.5906	2.25175	0.194725	11.5637	6.29225e-31	1.85557e-29	ENSNFUG00015007181
136.473	2.24943	0.266392	8.44407	3.06479e-17	3.18198e-16	ENSNFUG00015018074	AVPR1A
135.442	2.24756	0.230989	9.73015	2.24263e-22	3.58136e-21	ENSNFUG00015006696
56.6829	2.24754	0.270811	8.29929	1.04731e-16	1.03327e-15	ENSNFUG00015003396
116.611	2.24637	0.224691	9.99762	1.56102e-23	2.73381e-22	ENSNFUG00015014630	ndrg4
222.41	2.2439	0.198121	11.3259	9.76234e-30	2.61681e-28	ENSNFUG00015012354	lrrc23
850.332	2.24317	0.593681	3.7784	0.000157837	0.000385419	ENSNFUG00015023275
72.1261	2.23735	0.290968	7.68933	1.47912e-14	1.20347e-13	ENSNFUG00015011394	CABZ01074899.1
872.503	2.23353	0.317482	7.03513	1.99078e-12	1.327e-11	ENSNFUG00015017418	Nfu_g_1_001221
609.121	2.22692	0.564383	3.94576	7.95484e-05	0.000203725	ENSNFUG00015009888	rgs13b
246.437	2.21936	0.295193	7.51832	5.54832e-14	4.27968e-13	ENSNFUG00015007305
2478.29	2.21921	0.571023	3.88637	0.000101753	0.000256546	ENSNFUG00015002962	si:ch211-256m1.8
243.204	2.21754	0.501375	4.42291	9.73811e-06	2.86458e-05	ENSNFUG00015011316	mmp25b
159.258	2.2172	0.160124	13.8468	1.33076e-43	7.48564e-42	ENSNFUG00015016459	plxna4
535.479	2.21631	0.146293	15.1498	7.60197e-52	6.14814e-50	ENSNFUG00015000062	proza
65.6	2.21223	0.455455	4.85717	1.19074e-06	3.99044e-06	ENSNFUG00015012931
706.537	2.21197	0.20119	10.9944	4.0654e-28	9.72187e-27	ENSNFUG00015006701	malt3
83.8513	2.21178	0.19036	11.6189	3.30281e-31	9.95809e-30	ENSNFUG00015022742	nfatc4
156.885	2.20914	0.19183	11.5161	1.09433e-30	3.15797e-29	ENSNFUG00015017239
106.014	2.20675	0.185513	11.8954	1.25052e-32	4.05589e-31	ENSNFUG00015009087	eepd1
411.552	2.20604	0.287866	7.66343	1.81032e-14	1.45847e-13	ENSNFUG00015020157	csrnp1b
53.5975	2.20056	0.26517	8.29866	1.05291e-16	1.03825e-15	ENSNFUG00015021160	vill
79.8049	2.19896	0.266763	8.24311	1.67787e-16	1.61977e-15	ENSNFUG00015011084	rgma
153.66	2.18572	0.241795	9.03959	1.57265e-19	1.96128e-18	ENSNFUG00015003075
318.725	2.18476	0.308706	7.07715	1.4715e-12	9.91381e-12	ENSNFUG00015010057	si:ch211-180a12.2
118.549	2.18457	0.196862	11.0969	1.29835e-28	3.1857e-27	ENSNFUG00015015116
345.773	2.18356	0.267252	8.1704	3.07377e-16	2.88744e-15	ENSNFUG00015014253
210.476	2.17998	0.120164	18.1416	1.49485e-73	2.42835e-71	ENSNFUG00015004933	pnpla2
150.681	2.1789	0.244731	8.90327	5.42261e-19	6.46732e-18	ENSNFUG00015002333	ier2b
199.46	2.17025	0.161729	13.419	4.67792e-41	2.34443e-39	ENSNFUG00015005830	rdh12
71.637	2.16875	0.380865	5.69428	1.23891e-08	5.38548e-08	ENSNFUG00015019392	dusp8a
103.15	2.16798	0.233695	9.27697	1.74366e-20	2.37925e-19	ENSNFUG00015003078	arhgap22a
62.8641	2.16253	0.435396	4.96681	6.80624e-07	2.37293e-06	ENSNFUG00015006619	il13ra2
107.767	2.15976	0.245796	8.7868	1.53874e-18	1.77129e-17	ENSNFUG00015019412
251.48	2.15102	0.255689	8.41263	4.00919e-17	4.13063e-16	ENSNFUG00015002543	chrm5b
256.227	2.1501	0.120667	17.8185	5.07804e-71	7.65525e-69	ENSNFUG00015001218	sfxn5b
113.155	2.14532	0.385596	5.56365	2.64189e-08	1.1019e-07	ENSNFUG00015003201	ppef1
2516.24	2.14095	0.203471	10.5221	6.83344e-26	1.39663e-24	ENSNFUG00015008140	hipk3b
169.356	2.13989	0.312939	6.83803	8.02878e-12	5.02973e-11	ENSNFUG00015004593
410.845	2.13705	0.205845	10.3818	3.00054e-25	5.86537e-24	ENSNFUG00015011828
96.1845	2.1331	0.210729	10.1225	4.39212e-24	8.00436e-23	ENSNFUG00015005390
586.778	2.13171	0.211387	10.0844	6.47622e-24	1.1656e-22	ENSNFUG00015019551	nrp1a
123.869	2.1263	0.39233	5.41966	5.97117e-08	2.38341e-07	ENSNFUG00015008868	Nfu_g_1_019538
54.0751	2.12576	0.429753	4.94647	7.55712e-07	2.61488e-06	ENSNFUG00015000530
53.3404	2.12512	0.43285	4.90959	9.12651e-07	3.11614e-06	ENSNFUG00015008525	stac
135.555	2.12291	0.644501	3.29388	0.000988141	0.00210616	ENSNFUG00015017009	adamts13
62.8188	2.12176	0.350492	6.05364	1.41606e-09	6.88445e-09	ENSNFUG00015024543	ppp1r9alb
398.165	2.12084	0.0964488	21.9893	3.64638e-107	1.1847e-104	ENSNFUG00015018611	dgke
62.1293	2.11959	0.245354	8.63888	5.67689e-18	6.24856e-17	ENSNFUG00015006891	gria4b
126.87	2.11741	0.315826	6.70434	2.0232e-11	1.21962e-10	ENSNFUG00015004586
141.013	2.11428	0.243341	8.68857	3.67028e-18	4.11194e-17	ENSNFUG00015018783	pth2ra
58.732	2.11096	0.261635	8.06834	7.12593e-16	6.47138e-15	ENSNFUG00015016254	trpc4a
604.616	2.10906	0.344854	6.11581	9.607e-10	4.78294e-09	ENSNFUG00015001743
74.4502	2.10657	0.348409	6.04627	1.48236e-09	7.19568e-09	ENSNFUG00015018495	EEF1A1
69.3698	2.10394	0.195569	10.7581	5.42906e-27	1.20643e-25	ENSNFUG00015005303	trpt1
540.483	2.09694	0.215028	9.75195	1.80957e-22	2.9145e-21	ENSNFUG00015024209	slc43a2b
534.978	2.09185	0.384907	5.43469	5.48908e-08	2.20312e-07	ENSNFUG00015003070	SLC26A3
308.825	2.08713	0.334669	6.23641	4.47738e-10	2.31663e-09	ENSNFUG00015025366	fam43a
193.716	2.08409	0.348769	5.97557	2.29285e-09	1.09052e-08	ENSNFUG00015012140	mybphb
78.8273	2.07933	0.172336	12.0655	1.60645e-33	5.44458e-32	ENSNFUG00015016323	calcrla
574.723	2.07442	0.126595	16.3863	2.39589e-60	2.46711e-58	ENSNFUG00015010511	rnf141
120.125	2.07386	0.154477	13.4251	4.31262e-41	2.16712e-39	ENSNFUG00015017780	LRRC16B
139.216	2.0736	0.240741	8.61341	7.09189e-18	7.75621e-17	ENSNFUG00015024970	fzd10
92.3279	2.07168	0.244602	8.46958	2.46276e-17	2.57967e-16	ENSNFUG00015019350
55.1661	2.06743	0.413725	4.99712	5.81938e-07	2.05049e-06	ENSNFUG00015003167
103.801	2.06527	0.34246	6.03069	1.63266e-09	7.88865e-09	ENSNFUG00015005410	lyn
511.543	2.06231	0.153279	13.4546	2.89285e-41	1.4654e-39	ENSNFUG00015006192	pde4bb
75.3468	2.05975	0.272012	7.57228	3.66742e-14	2.88074e-13	ENSNFUG00015008374	itm2cb
197.696	2.05806	0.161524	12.7415	3.47743e-37	1.41226e-35	ENSNFUG00015011497
305.277	2.05646	0.194752	10.5594	4.5975e-26	9.49948e-25	ENSNFUG00015023196	larp6a
150.661	2.05539	0.248079	8.28522	1.17889e-16	1.15463e-15	ENSNFUG00015008517
215.944	2.04777	0.340501	6.014	1.81006e-09	8.70564e-09	ENSNFUG00015016632
131.738	2.04159	0.184788	11.0483	2.23519e-28	5.42084e-27	ENSNFUG00015009283
359.238	2.03928	0.264793	7.70141	1.34577e-14	1.1002e-13	ENSNFUG00015001390	jag2b
217.349	2.03834	0.208898	9.75755	1.71244e-22	2.76042e-21	ENSNFUG00015006403
249.66	2.03771	0.420931	4.84095	1.29218e-06	4.30894e-06	ENSNFUG00015022871	NRCAM
64.0701	2.03669	0.317641	6.41192	1.43694e-10	7.86685e-10	ENSNFUG00015024227	tprg1l
158.762	2.03454	0.274394	7.41464	1.21954e-13	9.06909e-13	ENSNFUG00015009442
215.279	2.03167	0.136189	14.918	2.51691e-50	1.91244e-48	ENSNFUG00015022859	nedd9
111.205	2.03051	0.367388	5.52689	3.25957e-08	1.34437e-07	ENSNFUG00015016633
327.994	2.02989	0.388514	5.22476	1.74379e-07	6.57333e-07	ENSNFUG00015019155	LBP
84.5835	2.02981	0.258147	7.86302	3.74986e-15	3.22218e-14	ENSNFUG00015020107	spmap2
52.8134	2.02874	0.275462	7.36484	1.77355e-13	1.29739e-12	ENSNFUG00015006825	sox4b
267.915	2.02623	0.174773	11.5935	4.44624e-31	1.31945e-29	ENSNFUG00015003283	cfap184
90.3257	2.0247	0.307151	6.59188	4.34298e-11	2.51426e-10	ENSNFUG00015000697	Nfu_g_1_018191
55.1095	2.01762	0.224006	9.007	2.11768e-19	2.60991e-18	ENSNFUG00015002375
65.3482	2.01755	0.224955	8.96867	3.0011e-19	3.65092e-18	ENSNFUG00015022757	pfkfb1
2518.68	2.01382	0.16444	12.2465	1.75421e-34	6.24884e-33	ENSNFUG00015009391
204.996	2.01371	0.18823	10.6981	1.03832e-26	2.2464e-25	ENSNFUG00015007140	renbp
348.771	2.0123	0.217767	9.2406	2.45122e-20	3.29934e-19	ENSNFUG00015023979	OTOP1
124.79	2.00587	0.292321	6.86188	6.79606e-12	4.29893e-11	ENSNFUG00015004742	nmrk2
64.9949	2.0044	0.387448	5.17333	2.29953e-07	8.55019e-07	ENSNFUG00015008889
362.74	2.00336	0.253338	7.90783	2.61906e-15	2.27751e-14	ENSNFUG00015002737	EZH1
651.57	1.9969	0.256461	7.78637	6.896e-15	5.77548e-14	ENSNFUG00015018485	tspan36
237.17	1.99689	0.214259	9.32002	1.16323e-20	1.60821e-19	ENSNFUG00015004217	lrmp
61.269	1.9968	0.302809	6.59425	4.27412e-11	2.47744e-10	ENSNFUG00015011020
152.669	1.99676	0.394796	5.0577	4.2435e-07	1.52053e-06	ENSNFUG00015002270	ALOXE3
245.026	1.9961	0.247582	8.06238	7.48213e-16	6.77852e-15	ENSNFUG00015017147
90.1647	1.99492	0.221075	9.02371	1.81831e-19	2.25571e-18	ENSNFUG00015007934	trib3
162.347	1.99394	0.300168	6.64275	3.07887e-11	1.81024e-10	ENSNFUG00015020102	nog1
184.522	1.99099	0.225012	8.84838	8.87953e-19	1.04579e-17	ENSNFUG00015018421	ackr4b
110.756	1.98883	0.322522	6.16649	6.98214e-10	3.52928e-09	ENSNFUG00015021091	tm4sf18
582.102	1.97782	0.404888	4.88484	1.03511e-06	3.50129e-06	ENSNFUG00015022105	fkbp5
578	1.97295	0.0858617	22.9783	7.68903e-117	3.21983e-114	ENSNFUG00015020166	PACS1
189.928	1.96994	0.199374	9.8806	5.05274e-23	8.47853e-22	ENSNFUG00015022336	klhl24a
97.8643	1.9629	0.357921	5.48418	4.15392e-08	1.69367e-07	ENSNFUG00015006487	junba
56.2668	1.96198	0.189515	10.3527	4.07058e-25	7.85117e-24	ENSNFUG00015015479	bin1a
58.728	1.95913	0.826642	2.36998	0.0177889	0.029516	ENSNFUG00015015050	mlphb
73.6883	1.95727	0.184309	10.6195	2.41902e-26	5.09887e-25	ENSNFUG00015015266	glis1b
203.901	1.95557	0.206714	9.46029	3.07093e-21	4.45143e-20	ENSNFUG00015003837	sall3a
130.62	1.95333	0.199185	9.80662	1.05438e-22	1.72621e-21	ENSNFUG00015007296	RND2
305.227	1.95236	0.232314	8.404	4.31517e-17	4.43618e-16	ENSNFUG00015010904	angptl1a
137.166	1.9487	0.139469	13.9722	2.30316e-44	1.34367e-42	ENSNFUG00015013398	syt16
83.5384	1.94555	0.264899	7.34449	2.06549e-13	1.49758e-12	ENSNFUG00015018958	fam83e
131	1.943	0.142453	13.6396	2.32942e-42	1.2365e-40	ENSNFUG00015007513	pla2g4ab
118.6	1.94222	0.170987	11.3589	6.69662e-30	1.8157e-28	ENSNFUG00015022434	maneal
65.3922	1.94055	0.253217	7.66361	1.80774e-14	1.45702e-13	ENSNFUG00015020641	nab2
130.559	1.93927	0.386475	5.01784	5.22548e-07	1.85371e-06	ENSNFUG00015015418	mybpc2b
161.257	1.93853	0.307089	6.31259	2.74411e-10	1.45991e-09	ENSNFUG00015025151	tifa
77.9019	1.93642	0.348152	5.562	2.66707e-08	1.11142e-07	ENSNFUG00015021088	myo1hb
72.2323	1.93491	0.301492	6.41779	1.3827e-10	7.59636e-10	ENSNFUG00015004117	Nfu_g_1_016892
333.151	1.93462	0.243538	7.94381	1.96071e-15	1.72331e-14	ENSNFUG00015022927	bmp4
579.829	1.93388	0.0980152	19.7304	1.18281e-86	2.62221e-84	ENSNFUG00015013954	cpt1a2b
71.1523	1.92757	0.245855	7.84025	4.49646e-15	3.83573e-14	ENSNFUG00015020104
74.2818	1.92469	0.374805	5.13517	2.81884e-07	1.03807e-06	ENSNFUG00015020581
169.029	1.92218	0.287046	6.69643	2.1358e-11	1.28298e-10	ENSNFUG00015016808	si:dkey-178e17.3
1026.55	1.91964	0.174107	11.0256	2.87516e-28	6.91066e-27	ENSNFUG00015012784	FABP6
62.8945	1.9188	0.201928	9.50242	2.05064e-21	3.00485e-20	ENSNFUG00015025213	EPHB1
114.406	1.9123	0.255103	7.49617	6.571e-14	5.02125e-13	ENSNFUG00015015943	prickle1b
377.784	1.91184	0.2835	6.74369	1.54413e-11	9.42279e-11	ENSNFUG00015013427	csf1ra
77.3743	1.9113	0.426235	4.48416	7.32032e-06	2.19691e-05	ENSNFUG00015024408	cyp4f3
57.5239	1.90558	0.29668	6.42302	1.33594e-10	7.35019e-10	ENSNFUG00015015774	kcng3
68.7158	1.90413	0.263386	7.22943	4.85014e-13	3.38504e-12	ENSNFUG00015023042	sntg2
266.789	1.90004	0.196652	9.66193	4.37528e-22	6.80263e-21	ENSNFUG00015023236	lingo2b
107.44	1.89922	0.307399	6.17835	6.47764e-10	3.28838e-09	ENSNFUG00015019254	mkxa
1575.49	1.89907	0.165091	11.5032	1.27145e-30	3.65231e-29	ENSNFUG00015005936
300.372	1.8954	0.27207	6.96661	3.24678e-12	2.12218e-11	ENSNFUG00015007618	scg3
105.738	1.89516	0.289388	6.54885	5.7983e-11	3.31502e-10	ENSNFUG00015020690	dusp6
51.0427	1.89466	0.306726	6.17703	6.5319e-10	3.31272e-09	ENSNFUG00015011574	tmem187
50.6322	1.89271	0.21113	8.96465	3.11258e-19	3.77678e-18	ENSNFUG00015006988	twf2b
1688.88	1.89131	0.203599	9.28939	1.55169e-20	2.12501e-19	ENSNFUG00015005947	abca1a
65.9225	1.8911	0.335328	5.63954	1.7051e-08	7.28096e-08	ENSNFUG00015012523
79.629	1.89015	0.406044	4.65505	3.23905e-06	1.01576e-05	ENSNFUG00015003216	aplp1
186.907	1.88588	0.334741	5.63384	1.76244e-08	7.5122e-08	ENSNFUG00015019285	Nfu_g_1_002684
324.267	1.88567	0.344489	5.47383	4.4041e-08	1.78937e-07	ENSNFUG00015020662	slc46a2
206.603	1.88478	0.306743	6.1445	8.02134e-10	4.0297e-09	ENSNFUG00015005274	CU570987.1
155.371	1.88406	0.217657	8.65609	4.88207e-18	5.39576e-17	ENSNFUG00015008926	zmp:0000000936
86.3535	1.88219	0.260368	7.22896	4.86717e-13	3.39567e-12	ENSNFUG00015007552	SLC22A23
60.3711	1.8819	0.209058	9.00177	2.22103e-19	2.73371e-18	ENSNFUG00015011859
446.482	1.88143	0.160513	11.7214	9.90432e-32	3.08491e-30	ENSNFUG00015018284	pabpc4
879.057	1.88141	0.237361	7.92636	2.25671e-15	1.97334e-14	ENSNFUG00015014725
205.327	1.87705	0.165109	11.3686	5.99558e-30	1.63031e-28	ENSNFUG00015011421
184.3	1.87567	0.236127	7.94348	1.9659e-15	1.72706e-14	ENSNFUG00015016103
79.0198	1.87331	0.164952	11.3567	6.86675e-30	1.85915e-28	ENSNFUG00015000228
195.936	1.873	0.348232	5.37859	7.50725e-08	2.96141e-07	ENSNFUG00015003951
271.837	1.87161	0.248435	7.5336	4.93614e-14	3.82312e-13	ENSNFUG00015002851	si:ch211-241f5.3
103.618	1.86877	0.176604	10.5817	3.62243e-26	7.55937e-25	ENSNFUG00015012961	abi3b
50.5208	1.86793	0.268811	6.94886	3.68244e-12	2.39861e-11	ENSNFUG00015014379	ST8SIA3
122.248	1.86788	0.151738	12.3099	8.01385e-35	2.89297e-33	ENSNFUG00015001936	b3galt11
101.101	1.86661	0.169931	10.9845	4.53508e-28	1.08313e-26	ENSNFUG00015018819
393.769	1.86614	0.279565	6.67514	2.46991e-11	1.47195e-10	ENSNFUG00015006049	si:ch211-10a23.2
237.995	1.86517	0.198773	9.38342	6.38693e-21	9.01537e-20	ENSNFUG00015000983	OLA.5669
368.749	1.86169	0.193069	9.64261	5.28286e-22	8.15317e-21	ENSNFUG00015020688	arrdc1a
89.7734	1.85962	0.320564	5.80107	6.58939e-09	2.9642e-08	ENSNFUG00015021714	RND1
267.097	1.85915	0.308882	6.01895	1.75549e-09	8.46045e-09	ENSNFUG00015018809
1336.27	1.85851	0.0921954	20.1584	2.27035e-90	5.28178e-88	ENSNFUG00015004210	klhl3
360.984	1.85846	0.318136	5.84172	5.16639e-09	2.35499e-08	ENSNFUG00015003037	phospho1
194.183	1.85544	0.1274	14.5639	4.76329e-48	3.31215e-46	ENSNFUG00015004213	niban2a
804.318	1.84901	0.311733	5.93137	3.00411e-09	1.4054e-08	ENSNFUG00015011936	pdgfra
433.564	1.84649	0.105193	17.5533	5.61395e-69	7.83625e-67	ENSNFUG00015012867	tulp1b
206.811	1.84581	0.365781	5.04623	4.50612e-07	1.60973e-06	ENSNFUG00015008054	mmp28
2104.62	1.84551	0.208743	8.84107	9.48027e-19	1.11375e-17	ENSNFUG00015023249
1050.99	1.8451	0.246925	7.47229	7.88128e-14	5.97886e-13	ENSNFUG00015021761	bbof1b
64.1781	1.8404	0.452726	4.06516	4.8e-05	0.00012736	ENSNFUG00015011249	rap1gapb
377.083	1.83911	0.390493	4.70972	2.48058e-06	7.92002e-06	ENSNFUG00015014348	TP53I3
936.163	1.83653	0.25472	7.20999	5.59545e-13	3.88363e-12	ENSNFUG00015004139	moxd1l
137.069	1.83639	0.151193	12.146	6.0208e-34	2.08176e-32	ENSNFUG00015013494	dalrd3
212.06	1.83636	0.185015	9.9255	3.22492e-23	5.51456e-22	ENSNFUG00015022355	gnb3b
171.264	1.83418	0.256253	7.15768	8.20514e-13	5.63065e-12	ENSNFUG00015017912	tagapb
53.5555	1.83113	0.227277	8.0568	7.832e-16	7.08867e-15	ENSNFUG00015015263
509.154	1.83104	0.247517	7.39766	1.38605e-13	1.02426e-12	ENSNFUG00015023205	pgap4
673.223	1.83097	0.161483	11.3384	8.4635e-30	2.28163e-28	ENSNFUG00015001876	stard15
63.4476	1.82708	0.235053	7.77303	7.66323e-15	6.39247e-14	ENSNFUG00015024589	si:dkey-178k16.1
87.2633	1.8269	0.174033	10.4974	8.87685e-26	1.8006e-24	ENSNFUG00015000706	pcdh2aa1
163.897	1.82597	0.125312	14.5713	4.27497e-48	2.98361e-46	ENSNFUG00015024724
160.388	1.82507	0.652241	2.79815	0.00513968	0.00951956	ENSNFUG00015000879	TGFB3
335.638	1.82497	0.431352	4.23082	2.32844e-05	6.49167e-05	ENSNFUG00015004493
414.584	1.82465	0.355212	5.13678	2.79482e-07	1.02946e-06	ENSNFUG00015022411
1113.94	1.82453	0.109246	16.7012	1.28554e-62	1.39223e-60	ENSNFUG00015011135	CABLES2
152.895	1.82369	0.174007	10.4806	1.06074e-25	2.13782e-24	ENSNFUG00015004558	swap70a
376.538	1.82312	0.236589	7.70583	1.29999e-14	1.0637e-13	ENSNFUG00015007144	FBP1A
65.7904	1.8227	0.395244	4.61158	3.99614e-06	1.23854e-05	ENSNFUG00015011613	prr15lb
196.391	1.82065	0.202985	8.9694	2.98147e-19	3.63173e-18	ENSNFUG00015024260	dlg1
65.2069	1.81925	0.302707	6.00992	1.85612e-09	8.91582e-09	ENSNFUG00015008927
644.09	1.81795	0.0817553	22.2365	1.52411e-109	5.63142e-107	ENSNFUG00015010182	sqor
157.759	1.81645	0.304945	5.95665	2.57455e-09	1.21409e-08	ENSNFUG00015004364	cebpa
102.098	1.81598	0.274403	6.61792	3.64296e-11	2.12862e-10	ENSNFUG00015005689	fgd4a
141.907	1.81573	0.24861	7.30351	2.8036e-13	2.00269e-12	ENSNFUG00015010510	CYP2J2
94.369	1.81531	0.46421	3.91054	9.20915e-05	0.000233531	ENSNFUG00015014567	mustn1a
69.692	1.81438	0.315556	5.74978	8.93572e-09	3.94621e-08	ENSNFUG00015003708	aipl2
88.2926	1.81331	0.363763	4.98485	6.20093e-07	2.17477e-06	ENSNFUG00015017012	CR762483.1
71.3879	1.81108	0.22907	7.90622	2.65323e-15	2.30403e-14	ENSNFUG00015003974	glt8d2
1208.85	1.81069	0.440493	4.11059	3.94645e-05	0.000106254	ENSNFUG00015013677	rbp4
217.261	1.80839	0.294661	6.13719	8.39953e-10	4.21296e-09	ENSNFUG00015024757	spns3
53.252	1.80804	0.430297	4.20184	2.64758e-05	7.32182e-05	ENSNFUG00015018144	igf2b
96.5004	1.80583	0.290766	6.21058	5.27884e-10	2.70753e-09	ENSNFUG00015007727	klf3
261.119	1.80285	0.173381	10.3982	2.52632e-25	4.95897e-24	ENSNFUG00015006798	asb14a
91.6335	1.80248	0.234553	7.68473	1.53318e-14	1.24531e-13	ENSNFUG00015010454	lrfn5b
84.3201	1.80242	0.175237	10.2856	8.1817e-25	1.5433e-23	ENSNFUG00015021792
65.9635	1.80084	0.27849	6.46646	1.00324e-10	5.58991e-10	ENSNFUG00015006861	PPIC
475.734	1.80037	0.136554	13.1843	1.08037e-39	5.12807e-38	ENSNFUG00015018103	arsh
1692.81	1.80029	0.155004	11.6144	3.48126e-31	1.0446e-29	ENSNFUG00015007917	cast
884.015	1.79678	0.472486	3.80282	0.000143058	0.000352023	ENSNFUG00015014613	Nfu_g_1_012693
185.989	1.79674	0.124111	14.4769	1.69634e-47	1.12953e-45	ENSNFUG00015012672	si:ch211-260e23.9
1621.59	1.79624	0.179788	9.99091	1.67038e-23	2.92263e-22	ENSNFUG00015009643	ca7
60.7217	1.79481	0.30506	5.88345	4.01803e-09	1.85351e-08	ENSNFUG00015002858
50.529	1.79429	0.284097	6.31576	2.68843e-10	1.43217e-09	ENSNFUG00015024880	zgc:162707
173.416	1.79036	0.220103	8.13417	4.14757e-16	3.85579e-15	ENSNFUG00015001157	akt3a
249.2	1.78985	0.130929	13.6704	1.52594e-42	8.19227e-41	ENSNFUG00015024582	cry1b
219.149	1.78949	0.291945	6.12953	8.81374e-10	4.40663e-09	ENSNFUG00015003845	c5ar1
614.029	1.78947	0.0886887	20.177	1.55843e-90	3.67087e-88	ENSNFUG00015024672
299.367	1.78867	0.245946	7.27261	3.52606e-13	2.49419e-12	ENSNFUG00015001503
76.9036	1.78859	0.445508	4.01473	5.95144e-05	0.000155331	ENSNFUG00015008782	adamts6
417.393	1.78834	0.220793	8.09963	5.5126e-16	5.06729e-15	ENSNFUG00015023248	IGFBP3
113.953	1.78769	0.154749	11.5522	7.19944e-31	2.11318e-29	ENSNFUG00015001505	mri1
85.5714	1.78768	0.226948	7.87705	3.35197e-15	2.89746e-14	ENSNFUG00015017054
352.623	1.78734	0.2463	7.25675	3.96502e-13	2.78483e-12	ENSNFUG00015002854	rab3db
69.8018	1.78402	0.253242	7.04474	1.85807e-12	1.24161e-11	ENSNFUG00015017725	agpat9l
2957.78	1.7823	0.0722821	24.6576	3.04744e-134	1.79456e-131	ENSNFUG00015000626	slc29a1a
577.659	1.77966	0.23757	7.4911	6.82996e-14	5.20857e-13	ENSNFUG00015013708
72.8722	1.7795	0.243055	7.32138	2.45439e-13	1.76394e-12	ENSNFUG00015015291	elovl8b
85.317	1.77906	0.28291	6.28842	3.20705e-10	1.68998e-09	ENSNFUG00015014777
155.633	1.77646	0.206235	8.6138	7.06793e-18	7.7345e-17	ENSNFUG00015004713	PPARG
244.453	1.77415	0.103104	17.2075	2.33366e-66	2.99153e-64	ENSNFUG00015017331	GADL1
106.568	1.77415	0.427417	4.15087	3.31219e-05	9.02732e-05	ENSNFUG00015010743
85.3783	1.7718	0.232912	7.60717	2.80163e-14	2.22477e-13	ENSNFUG00015013546	mmp11a
58.8039	1.77015	0.185013	9.56771	1.09304e-21	1.63212e-20	ENSNFUG00015014449
97.1125	1.76886	0.273828	6.45973	1.04888e-10	5.83902e-10	ENSNFUG00015012631	eloal
404.978	1.76792	0.202673	8.72303	2.70853e-18	3.05992e-17	ENSNFUG00015002243	AIF1
65.5921	1.76662	0.47942	3.6849	0.000228792	0.000544088	ENSNFUG00015013700	hey2
584.69	1.76631	0.186915	9.44983	3.3937e-21	4.90045e-20	ENSNFUG00015000279	arhgap32a
168.541	1.76505	0.199787	8.8347	1.00368e-18	1.17693e-17	ENSNFUG00015008213	zgc:162898
393.338	1.76274	0.52094	3.38377	0.000714987	0.00156067	ENSNFUG00015013412	ptx3a
150.912	1.76253	0.412349	4.27436	1.91686e-05	5.40576e-05	ENSNFUG00015003355	efemp1
55.8869	1.76192	0.736201	2.39326	0.0166993	0.0278751	ENSNFUG00015024307
1257.29	1.76099	0.0945927	18.6165	2.36102e-77	4.4491e-75	ENSNFUG00015011607
53.4165	1.76091	0.36236	4.85956	1.17644e-06	3.94534e-06	ENSNFUG00015023517	sdr42e2
256.064	1.75951	0.541363	3.25014	0.00115348	0.0024251	ENSNFUG00015020566	si:dkey-15h8.17
259.809	1.75902	0.343768	5.11689	3.10619e-07	1.13546e-06	ENSNFUG00015013703	hck
195.306	1.75479	0.159603	10.9947	4.05081e-28	9.6993e-27	ENSNFUG00015019040
97.4411	1.75361	0.21383	8.20094	2.38522e-16	2.26548e-15	ENSNFUG00015017915
89.5013	1.74942	0.267352	6.54351	6.00933e-11	3.43151e-10	ENSNFUG00015004962
88.7852	1.74893	0.182283	9.59458	8.4256e-22	1.27836e-20	ENSNFUG00015006664	msx2b
522.563	1.74891	0.169031	10.3467	4.33227e-25	8.33884e-24	ENSNFUG00015004446	WASL
217.69	1.74804	0.2938	5.94977	2.68528e-09	1.2644e-08	ENSNFUG00015009722	b4galnt1b
63.7653	1.74441	0.220449	7.91301	2.51241e-15	2.18881e-14	ENSNFUG00015005379	msrab
195.836	1.74424	0.193354	9.02095	1.86463e-19	2.31013e-18	ENSNFUG00015000574	slc7a7
51.3846	1.74408	0.221619	7.86973	3.55406e-15	3.06511e-14	ENSNFUG00015019870
230.642	1.74353	0.194388	8.96931	2.98372e-19	3.63212e-18	ENSNFUG00015005561	gulp1a
155.123	1.74294	0.1994	8.7409	2.31258e-18	2.62203e-17	ENSNFUG00015008061	phldb1a
545.291	1.74065	0.164877	10.5573	4.70193e-26	9.70461e-25	ENSNFUG00015005926	GGA2
111.835	1.73996	0.169009	10.2951	7.41391e-25	1.40551e-23	ENSNFUG00015018757	hyal1
259.083	1.73874	0.215582	8.06533	7.30357e-16	6.62312e-15	ENSNFUG00015019435	tmod4
955.243	1.73818	0.163444	10.6347	2.05482e-26	4.36047e-25	ENSNFUG00015010268	gsta.2
318.36	1.73804	0.166158	10.4601	1.31672e-25	2.6368e-24	ENSNFUG00015001546	GABRA5
96.7462	1.73647	0.151562	11.4572	2.16445e-30	6.10583e-29	ENSNFUG00015015858
144.706	1.73541	0.302406	5.73869	9.54119e-09	4.20276e-08	ENSNFUG00015024762
192.817	1.73521	0.114563	15.1464	8.009e-52	6.44964e-50	ENSNFUG00015004727	faxca
53.363	1.73466	0.453262	3.82705	0.000129687	0.000321428	ENSNFUG00015010558	erbb3a
298.389	1.73441	0.131906	13.1488	1.72866e-39	8.04316e-38	ENSNFUG00015006161	tes
1548.33	1.73387	0.214052	8.10022	5.48594e-16	5.04771e-15	ENSNFUG00015005927
2805.73	1.73297	0.529211	3.27462	0.00105804	0.00224094	ENSNFUG00015022234
69.0924	1.7319	0.179832	9.63065	5.93551e-22	9.14545e-21	ENSNFUG00015015750
114.491	1.73044	0.249348	6.93986	3.92494e-12	2.54952e-11	ENSNFUG00015000571	MFNG
54.8	1.73013	0.21423	8.07606	6.68923e-16	6.10421e-15	ENSNFUG00015023189	HOMER2
85.1563	1.72954	0.35142	4.92158	8.58502e-07	2.94403e-06	ENSNFUG00015014308	cpa5
264.572	1.72928	0.211508	8.17596	2.93508e-16	2.76267e-15	ENSNFUG00015020898	si:ch73-162j3.4
629.801	1.72911	0.198442	8.71342	2.94834e-18	3.32686e-17	ENSNFUG00015009964	gabrb2a
102.714	1.72751	0.139381	12.3942	2.81064e-35	1.04055e-33	ENSNFUG00015016003	Nfu_g_1_011621
104.942	1.7272	0.153766	11.2327	2.81874e-29	7.36705e-28	ENSNFUG00015023783	ERRFI1
65.3015	1.72608	0.204566	8.43774	3.2352e-17	3.3552e-16	ENSNFUG00015010811
59.0694	1.72348	0.246863	6.98154	2.91961e-12	1.91631e-11	ENSNFUG00015016531
188.821	1.72262	0.121597	14.1666	1.47448e-45	9.17002e-44	ENSNFUG00015018136	rgs19
123.255	1.7226	0.334833	5.14466	2.68011e-07	9.9008e-07	ENSNFUG00015023954	SPI1
189.888	1.72214	0.177062	9.7262	2.3314e-22	3.71369e-21	ENSNFUG00015011284
121.743	1.71714	0.174422	9.84476	7.22138e-23	1.19368e-21	ENSNFUG00015012119	slc25a47a
243.604	1.71637	0.288841	5.94226	2.81127e-09	1.3201e-08	ENSNFUG00015003153
369.824	1.71631	0.484606	3.54166	0.00039762	0.000907991	ENSNFUG00015015472	SCN4A
101.135	1.71451	0.273413	6.27075	3.5931e-10	1.88027e-09	ENSNFUG00015022923	wnt2ba
280.893	1.71345	0.322725	5.30934	1.10026e-07	4.25297e-07	ENSNFUG00015002164	ccn2a
83.7254	1.71166	0.345606	4.95262	7.32207e-07	2.53914e-06	ENSNFUG00015024682	KCNH4
83.0855	1.71103	0.163644	10.4558	1.37826e-25	2.75127e-24	ENSNFUG00015006203	si:dkeyp-97b10.3
171.913	1.70891	0.232128	7.36192	1.81285e-13	1.3246e-12	ENSNFUG00015006912
69.0023	1.70822	0.40663	4.20092	2.6583e-05	7.34826e-05	ENSNFUG00015002346	mtmr7a
66.1279	1.7075	0.395264	4.3199	1.56101e-05	4.45827e-05	ENSNFUG00015016440
436.517	1.70727	0.375818	4.54281	5.55089e-06	1.68803e-05	ENSNFUG00015001371	cyba
53.8743	1.70727	0.521037	3.27668	0.00105035	0.00222692	ENSNFUG00015022813	dhrs3b
267.776	1.70673	0.185205	9.21535	3.10262e-20	4.14063e-19	ENSNFUG00015001825
449.494	1.70645	0.266097	6.41287	1.42802e-10	7.82711e-10	ENSNFUG00015016429	TSPAN8
138.812	1.70301	0.148688	11.4536	2.25567e-30	6.34417e-29	ENSNFUG00015005696	slc4a10a
1226.3	1.70111	0.0931633	18.2594	1.7416e-74	2.95664e-72	ENSNFUG00015017882	PPP2R5A
81.2581	1.69968	0.177935	9.55222	1.26943e-21	1.88801e-20	ENSNFUG00015000497	mafk
51.8802	1.6992	0.427266	3.97691	6.98171e-05	0.00018052	ENSNFUG00015009558	rgs13a
293.72	1.69779	0.123014	13.8016	2.49309e-43	1.38583e-41	ENSNFUG00015020955	sh3glb1b
69.1467	1.69376	0.28062	6.03576	1.58215e-09	7.66231e-09	ENSNFUG00015009289	pcdh19
83.6054	1.68615	0.192187	8.77348	1.73226e-18	1.98436e-17	ENSNFUG00015009797
823.771	1.68591	0.157463	10.7067	9.46759e-27	2.05302e-25	ENSNFUG00015010368	sema7a
619.695	1.68319	0.116956	14.3917	5.83815e-47	3.78055e-45	ENSNFUG00015008628	C8orf82
462.741	1.68313	0.259336	6.49016	8.57478e-11	4.81045e-10	ENSNFUG00015019166	ndrg1a
853.705	1.68167	0.223168	7.53543	4.8671e-14	3.77275e-13	ENSNFUG00015019492	arrdc3a
52.8686	1.67942	0.511954	3.28042	0.00103654	0.00219911	ENSNFUG00015016099	oclnb
542.035	1.67868	0.175322	9.57483	1.02028e-21	1.5271e-20	ENSNFUG00015013203	mafba
333.784	1.6784	0.246414	6.81128	9.67337e-12	6.00214e-11	ENSNFUG00015007369	cyp3a65
465.995	1.67786	0.129238	12.9828	1.53274e-38	6.78002e-37	ENSNFUG00015021274	ildr2
110.38	1.67688	0.124205	13.5009	1.54495e-41	7.8897e-40	ENSNFUG00015012899	gprc5bb
227.279	1.67634	0.432599	3.87504	0.000106607	0.000267853	ENSNFUG00015022721	tat
409.173	1.67622	0.243604	6.88094	5.9457e-12	3.78772e-11	ENSNFUG00015006670	slc28a1
238.514	1.67596	0.217427	7.70814	1.27667e-14	1.04507e-13	ENSNFUG00015015048	bcl6ab
421.639	1.67134	0.223174	7.48898	6.94096e-14	5.29108e-13	ENSNFUG00015014945	nupr1a
94.929	1.667	0.277878	5.99904	1.98487e-09	9.50036e-09	ENSNFUG00015005620	st6galnac1.1
5709.24	1.65987	0.240779	6.89374	5.43427e-12	3.47838e-11	ENSNFUG00015010015
122.786	1.65878	0.293711	5.64765	1.62658e-08	6.96463e-08	ENSNFUG00015018433	MPEG1
1684.78	1.6575	0.138162	11.9968	3.69373e-33	1.23413e-31	ENSNFUG00015011525
158.082	1.65648	0.40152	4.12553	3.69879e-05	0.000100086	ENSNFUG00015002616	mylk5
249.786	1.65597	0.306579	5.40145	6.61045e-08	2.62689e-07	ENSNFUG00015013385	p2rx7
50.051	1.65455	0.289119	5.72273	1.04823e-08	4.59474e-08	ENSNFUG00015012863	RAB33B
128.754	1.65448	0.145194	11.3949	4.43102e-30	1.22431e-28	ENSNFUG00015011958
64.4532	1.65061	0.195074	8.46145	2.64064e-17	2.76292e-16	ENSNFUG00015012127	ppp1r14c
58.7459	1.6484	0.325469	5.0647	4.09045e-07	1.4696e-06	ENSNFUG00015006165	tmem47
9304.97	1.64839	0.200394	8.22577	1.93938e-16	1.85794e-15	ENSNFUG00015000694	krt95
742.314	1.64455	0.761554	2.15947	0.0308136	0.0486308	ENSNFUG00015024514
51.0585	1.64447	0.349	4.71193	2.45376e-06	7.84505e-06	ENSNFUG00015008328	colec12
804.836	1.64381	0.147387	11.1531	6.91912e-29	1.75012e-27	ENSNFUG00015017865	nfkbiaa
315.085	1.64246	0.117315	14.0005	1.54797e-44	9.08724e-43	ENSNFUG00015000195	nkx6.2
1499.99	1.63977	0.175894	9.32247	1.13664e-20	1.57261e-19	ENSNFUG00015021312	slc6a19a.1
65.9963	1.63864	0.291956	5.61262	1.99286e-08	8.44278e-08	ENSNFUG00015013286	tfr2
348.891	1.63493	0.181419	9.01194	2.02451e-19	2.49836e-18	ENSNFUG00015013552	fhdc4
53.7264	1.63157	0.410194	3.97755	6.96282e-05	0.000180106	ENSNFUG00015025219
68.4816	1.62845	0.180642	9.01477	1.97283e-19	2.43777e-18	ENSNFUG00015019405	unc5a
329.343	1.62641	0.334402	4.86363	1.15252e-06	3.86995e-06	ENSNFUG00015011799	lnx1
300.737	1.62378	0.11932	13.6086	3.55861e-42	1.88367e-40	ENSNFUG00015008703	MAPK8IP1
136.825	1.6217	0.220932	7.34025	2.13199e-13	1.54342e-12	ENSNFUG00015015123
234.008	1.61918	0.188738	8.57897	9.57276e-18	1.03375e-16	ENSNFUG00015018959	cyp24a1
296.121	1.61902	0.27082	5.97823	2.25577e-09	1.0737e-08	ENSNFUG00015009250	lmo7b
94.1928	1.61639	0.139415	11.5941	4.41711e-31	1.31316e-29	ENSNFUG00015019976
3845.43	1.61575	0.186603	8.65873	4.7703e-18	5.28152e-17	ENSNFUG00015014936
199.882	1.61552	0.266955	6.05165	1.43374e-09	6.96682e-09	ENSNFUG00015008342	ch25h
458.758	1.61547	0.153507	10.5238	6.71442e-26	1.37557e-24	ENSNFUG00015012176	shc1
169.328	1.61275	0.175353	9.19716	3.67552e-20	4.88101e-19	ENSNFUG00015002029	csrp2
994.803	1.61077	0.264428	6.09152	1.11847e-09	5.51305e-09	ENSNFUG00015014709
156.872	1.61064	0.136836	11.7706	5.53528e-32	1.74718e-30	ENSNFUG00015024171	ano9a
132.72	1.61019	0.227373	7.08172	1.42378e-12	9.61295e-12	ENSNFUG00015016762	MPZL2
332.251	1.60941	0.180396	8.92159	4.59655e-19	5.50651e-18	ENSNFUG00015002595	si:ch73-22o12.1
69.3315	1.60899	0.222716	7.22439	5.03359e-13	3.51048e-12	ENSNFUG00015013053
652.747	1.6089	0.0678556	23.7107	2.79946e-124	1.50723e-121	ENSNFUG00015014098
381.223	1.60769	0.0977876	16.4407	9.78468e-61	1.01869e-58	ENSNFUG00015025334	ttyh2
235.259	1.60493	0.280342	5.72488	1.03505e-08	4.54013e-08	ENSNFUG00015021353	ZNF503
175.467	1.60349	0.242273	6.61855	3.62751e-11	2.12025e-10	ENSNFUG00015013400	veph1
222.198	1.60277	0.124363	12.8879	5.26713e-38	2.24049e-36	ENSNFUG00015009533	adam8b
71.9638	1.60129	0.20864	7.67491	1.65534e-14	1.34123e-13	ENSNFUG00015017533	nfil3-6
178.28	1.59949	0.411898	3.88322	0.000103084	0.00025966	ENSNFUG00015011256	bcl6b
67.0051	1.59911	0.239433	6.67874	2.41013e-11	1.44042e-10	ENSNFUG00015018841	acvr2bb
170.678	1.59779	0.204648	7.80748	5.83443e-15	4.91699e-14	ENSNFUG00015018561	trpc6a
367.842	1.59701	0.118134	13.5186	1.21548e-41	6.24099e-40	ENSNFUG00015025468	matk
184.595	1.59372	0.183768	8.67244	4.22962e-18	4.71336e-17	ENSNFUG00015000656	pcdh1b
725.044	1.59362	0.143073	11.1385	8.15081e-29	2.03976e-27	ENSNFUG00015021357
347.402	1.58883	0.386931	4.10623	4.02166e-05	0.000108172	ENSNFUG00015017555	PPIAB
508.396	1.58693	0.453702	3.49773	0.000469244	0.00105865	ENSNFUG00015005660	CR847523.1
243.2	1.58102	0.240045	6.58636	4.50744e-11	2.60387e-10	ENSNFUG00015023948	hip1rb
51.7931	1.58058	0.285733	5.53165	3.17238e-08	1.31085e-07	ENSNFUG00015006642	si:ch211-1e14.1
297.857	1.58009	0.217356	7.26957	3.60627e-13	2.54996e-12	ENSNFUG00015010189	fyb1b
250.13	1.57681	0.342309	4.60638	4.0973e-06	1.26863e-05	ENSNFUG00015005480	lrrk2
74.6786	1.57292	0.411547	3.82196	0.000132394	0.00032762	ENSNFUG00015009031	U3
115.358	1.57224	0.245035	6.41638	1.3955e-10	7.6578e-10	ENSNFUG00015024874
111.779	1.57092	0.322647	4.86885	1.12248e-06	3.77444e-06	ENSNFUG00015017584	dapp1
164.485	1.57041	0.211978	7.40839	1.27837e-13	9.48786e-13	ENSNFUG00015006978	adcy5
60.8784	1.5703	0.20657	7.60178	2.92083e-14	2.31164e-13	ENSNFUG00015005190	dnajc6
600.385	1.56968	0.366219	4.28619	1.81768e-05	5.1399e-05	ENSNFUG00015017743	necap1
4865.26	1.5691	0.127162	12.3394	5.55864e-35	2.02998e-33	ENSNFUG00015005728	mthfr
230.453	1.56909	0.239998	6.53794	6.23716e-11	3.55622e-10	ENSNFUG00015011144
114.072	1.56837	0.155786	10.0675	7.69363e-24	1.37813e-22	ENSNFUG00015016932	hbegfa
126.731	1.56661	0.141924	11.0384	2.49521e-28	6.02817e-27	ENSNFUG00015015797
152.379	1.56374	0.29215	5.35253	8.67326e-08	3.39366e-07	ENSNFUG00015008323	glula
95.2525	1.56367	0.370951	4.21531	2.49441e-05	6.92262e-05	ENSNFUG00015022775
206.851	1.56171	0.174951	8.92656	4.39475e-19	5.27146e-18	ENSNFUG00015017884
67.8158	1.55947	0.297655	5.23919	1.61286e-07	6.09804e-07	ENSNFUG00015007743	zeb2a
104.029	1.55787	0.23575	6.60813	3.89194e-11	2.26707e-10	ENSNFUG00015011033	UNC119B
124.251	1.55694	0.283608	5.48976	4.02482e-08	1.64449e-07	ENSNFUG00015023140	limk1a
120.753	1.55547	0.22778	6.82881	8.56213e-12	5.34254e-11	ENSNFUG00015020053	srgap3
85.9702	1.5535	0.218716	7.10285	1.22212e-12	8.26918e-12	ENSNFUG00015022525
1015.21	1.55346	0.123399	12.5889	2.42924e-36	9.41905e-35	ENSNFUG00015006979	phc2a
830.716	1.55298	0.163195	9.51611	1.79779e-21	2.65082e-20	ENSNFUG00015007178	kif26ba
374.969	1.55291	0.224766	6.90902	4.87999e-12	3.13637e-11	ENSNFUG00015011451	sh3pxd2b
343.174	1.55192	0.175984	8.81856	1.15938e-18	1.34611e-17	ENSNFUG00015009256	nr1d2a
64.3244	1.54909	0.372675	4.15669	3.22898e-05	8.82222e-05	ENSNFUG00015010329	ptgir
257.347	1.54897	0.213643	7.25026	4.15987e-13	2.91624e-12	ENSNFUG00015019028	eif2ak2
137.992	1.548	0.299683	5.16545	2.39864e-07	8.90465e-07	ENSNFUG00015023435	si:ch211-195o20.7
72.6669	1.54406	0.212672	7.2603	3.86246e-13	2.71785e-12	ENSNFUG00015014162
412.668	1.54346	0.424593	3.63514	0.000277832	0.000651664	ENSNFUG00015013079	cpe
54.0689	1.54324	0.254239	6.07005	1.27868e-09	6.25046e-09	ENSNFUG00015006316	uncx4.1
151.191	1.54125	0.264695	5.82275	5.78882e-09	2.62348e-08	ENSNFUG00015013879	agpat4
224.267	1.53418	0.150965	10.1625	2.91648e-24	5.34613e-23	ENSNFUG00015015356	adcyap1r1a
197.227	1.53226	0.161189	9.50596	1.9822e-21	2.90908e-20	ENSNFUG00015012983	rdh14a
62.3584	1.53089	0.290601	5.268	1.37915e-07	5.26619e-07	ENSNFUG00015011976	EVA1A
251.672	1.52957	0.104115	14.6911	7.3527e-49	5.20881e-47	ENSNFUG00015000451	Nfu_g_1_003722
69.4222	1.5279	0.245328	6.228	4.72441e-10	2.43909e-09	ENSNFUG00015020689	mturn
97.2065	1.52686	0.175843	8.6831	3.8511e-18	4.30427e-17	ENSNFUG00015025325	trpv4
1390.55	1.52603	0.061102	24.9751	1.14052e-137	6.93287e-135	ENSNFUG00015013162	sv2
90.7598	1.52516	0.241486	6.31573	2.68892e-10	1.43217e-09	ENSNFUG00015010359	islr2
103.516	1.52339	0.154228	9.87752	5.21041e-23	8.71981e-22	ENSNFUG00015015844
207.552	1.52328	0.471597	3.23005	0.00123767	0.00258863	ENSNFUG00015003351	LYZ
267.646	1.5229	0.25057	6.07776	1.21872e-09	5.98683e-09	ENSNFUG00015013605
124.487	1.52044	0.349845	4.34605	1.38613e-05	3.9988e-05	ENSNFUG00015019311	sla1a
93.9285	1.51992	0.306069	4.96594	6.83676e-07	2.38225e-06	ENSNFUG00015006589	tbx2b
135.637	1.5196	0.310892	4.88789	1.01925e-06	3.45258e-06	ENSNFUG00015008208	igfbp3
52.2431	1.51737	0.30042	5.05083	4.39893e-07	1.57323e-06	ENSNFUG00015019201	mia
369.567	1.51715	0.092933	16.3252	6.53704e-60	6.58738e-58	ENSNFUG00015022268	aadat
541.996	1.5161	0.221568	6.84258	7.77804e-12	4.88727e-11	ENSNFUG00015001213
446.863	1.51584	0.113122	13.4	6.04363e-41	3.00491e-39	ENSNFUG00015018477	slc20a2
470.453	1.5142	0.174326	8.68603	3.75339e-18	4.20005e-17	ENSNFUG00015010180	pld3
281.292	1.51414	0.13049	11.6035	3.95581e-31	1.18511e-29	ENSNFUG00015017598	rbks
160.092	1.51377	0.415562	3.64271	0.000269787	0.000634294	ENSNFUG00015012689
207.861	1.5134	0.146475	10.3321	5.04368e-25	9.66868e-24	ENSNFUG00015020861	MTSS1
203.153	1.50829	0.12344	12.2188	2.46764e-34	8.72424e-33	ENSNFUG00015001873	stard14
339.213	1.50765	0.117031	12.8825	5.64626e-38	2.38561e-36	ENSNFUG00015016265	eif4ebp2
213.164	1.50623	0.180874	8.32754	8.25417e-17	8.23843e-16	ENSNFUG00015013767
301.024	1.50602	0.218354	6.89713	5.3063e-12	3.40045e-11	ENSNFUG00015007461	mmp14b
217.547	1.50569	0.10248	14.6926	7.19381e-49	5.11548e-47	ENSNFUG00015019899	cpsf3
5827.63	1.50502	0.105598	14.2524	4.33295e-46	2.74916e-44	ENSNFUG00015012770
209.436	1.50436	0.152733	9.84965	6.87854e-23	1.13801e-21	ENSNFUG00015003185	Nfu_g_1_001121
194.818	1.50364	0.133703	11.2461	2.42061e-29	6.34408e-28	ENSNFUG00015017348	mpp2a
61.2324	1.50214	0.251764	5.96646	2.4246e-09	1.1471e-08	ENSNFUG00015011094	SNAP25
503.265	1.50189	0.171308	8.76721	1.83155e-18	2.09555e-17	ENSNFUG00015010267	manba
50.1866	1.50156	0.37178	4.03885	5.37142e-05	0.00014115	ENSNFUG00015018351	RBM24A
251.929	1.49844	0.295672	5.06791	4.02204e-07	1.44751e-06	ENSNFUG00015010499	disc1
89.7006	1.49824	0.30954	4.84022	1.29697e-06	4.32186e-06	ENSNFUG00015020784	efna1a
152.6	1.49802	0.27162	5.51512	3.48544e-08	1.43343e-07	ENSNFUG00015018176	PDE3A
172.862	1.49773	0.191188	7.83378	4.73424e-15	4.02763e-14	ENSNFUG00015013565	slc45a2
97.9561	1.49632	0.238109	6.28419	3.2957e-10	1.7333e-09	ENSNFUG00015017150	ANO8
258.565	1.49619	0.110146	13.5837	5.00227e-42	2.62571e-40	ENSNFUG00015002914
81.9396	1.49362	0.152478	9.79562	1.17571e-22	1.91322e-21	ENSNFUG00015019652	dusp28
847.218	1.49335	0.258611	5.77449	7.71846e-09	3.43927e-08	ENSNFUG00015015697	myo1ca
653.756	1.49163	0.131282	11.3621	6.46049e-30	1.7542e-28	ENSNFUG00015024585
1078.25	1.4909	0.218082	6.83641	8.11998e-12	5.08349e-11	ENSNFUG00015008001	dab2
58.2753	1.49058	0.208108	7.16253	7.92001e-13	5.44291e-12	ENSNFUG00015022001	ndufa4b
79.1149	1.49032	0.219839	6.77914	1.20891e-11	7.43012e-11	ENSNFUG00015010666
386.597	1.4897	0.134647	11.0637	1.88107e-28	4.58562e-27	ENSNFUG00015019469	si:ch211-113g11.6
90.4285	1.48866	0.187874	7.92375	2.30449e-15	2.01325e-14	ENSNFUG00015019609
146.824	1.48742	0.294057	5.05827	4.23086e-07	1.5168e-06	ENSNFUG00015010283
87.9606	1.48622	0.214091	6.94201	3.8657e-12	2.5119e-11	ENSNFUG00015003703
245.991	1.48604	0.134428	11.0545	2.08414e-28	5.07409e-27	ENSNFUG00015004028	fgd4b
92.1743	1.48596	0.324548	4.57855	4.68201e-06	1.4374e-05	ENSNFUG00015020605	vwa7
877.572	1.48584	0.115343	12.882	5.68758e-38	2.39769e-36	ENSNFUG00015014225
1284.6	1.48412	0.112543	13.1872	1.04031e-39	4.95043e-38	ENSNFUG00015014138
77.2199	1.4837	0.242939	6.10732	1.01318e-09	5.02166e-09	ENSNFUG00015001036	apba1b
189.556	1.48351	0.286393	5.17996	2.21935e-07	8.2651e-07	ENSNFUG00015017977	ampd3b
322.362	1.48228	0.142389	10.4101	2.22983e-25	4.3907e-24	ENSNFUG00015005034	kcnj1b
628.458	1.4822	0.193838	7.64661	2.06348e-14	1.65747e-13	ENSNFUG00015017938
66.4213	1.48161	0.371314	3.99018	6.60238e-05	0.000171442	ENSNFUG00015023586
241.776	1.48095	0.266835	5.55008	2.85542e-08	1.18754e-07	ENSNFUG00015000600	ANO4
160.108	1.48078	0.136308	10.8635	1.72047e-27	3.925e-26	ENSNFUG00015022292	rpz2
211.658	1.48072	0.3244	4.56448	5.00725e-06	1.53176e-05	ENSNFUG00015012376
212.631	1.48061	0.443852	3.33583	0.00085045	0.00183433	ENSNFUG00015015577	ntd5
138.769	1.47909	0.156577	9.44644	3.50561e-21	5.05044e-20	ENSNFUG00015011941
114.298	1.47876	0.179429	8.24148	1.70093e-16	1.64034e-15	ENSNFUG00015018583	marchf8
115.242	1.47647	0.129497	11.4015	4.10855e-30	1.13688e-28	ENSNFUG00015002162
608.101	1.47609	0.17653	8.36174	6.17986e-17	6.2408e-16	ENSNFUG00015020044	fus
355.439	1.47586	0.221152	6.67351	2.49748e-11	1.48697e-10	ENSNFUG00015019774	tnfrsf21
137.444	1.47326	0.26623	5.53379	3.1338e-08	1.29617e-07	ENSNFUG00015008794	gadd45ab
118.877	1.473	0.173317	8.49887	1.91441e-17	2.02328e-16	ENSNFUG00015003652	pstpip2
149.071	1.47292	0.232929	6.32349	2.55724e-10	1.36667e-09	ENSNFUG00015013979	fam20cb
322.221	1.47074	0.199404	7.3757	1.6348e-13	1.19915e-12	ENSNFUG00015025236	itgb8
159.726	1.47061	0.286265	5.13723	2.78816e-07	1.02758e-06	ENSNFUG00015016963	CAPN3
321.263	1.46833	0.287305	5.11072	3.20931e-07	1.17089e-06	ENSNFUG00015019346	pik3ip1
136.412	1.46704	0.312899	4.68854	2.75155e-06	8.71286e-06	ENSNFUG00015021802	itga10
139.964	1.46669	0.287657	5.09876	3.41881e-07	1.24203e-06	ENSNFUG00015002666	ramp2
165.659	1.46649	0.147689	9.92954	3.0969e-23	5.31011e-22	ENSNFUG00015018408	enpp1
187.291	1.46551	0.188758	7.76394	8.23321e-15	6.84369e-14	ENSNFUG00015017935	abtb2b
89.322	1.4639	0.362443	4.03898	5.36845e-05	0.000141112	ENSNFUG00015006301	ptpreb
61.3763	1.46389	0.337482	4.3377	1.43983e-05	4.14359e-05	ENSNFUG00015008626	clcn2a
993.624	1.46353	0.122993	11.8993	1.19406e-32	3.89963e-31	ENSNFUG00015002990
628.171	1.46343	0.185259	7.8994	2.80242e-15	2.4291e-14	ENSNFUG00015010343	id2a
216.525	1.46335	0.15112	9.68333	3.54979e-22	5.56971e-21	ENSNFUG00015003107	rhoua
92.7319	1.46235	0.219044	6.67603	2.45497e-11	1.46536e-10	ENSNFUG00015016243	cax1
1013.61	1.4601	0.114848	12.7133	4.98636e-37	2.00348e-35	ENSNFUG00015023854	slc16a9a
54.2435	1.45909	0.205414	7.10316	1.21939e-12	8.25363e-12	ENSNFUG00015013161	il1rapl2
354.944	1.45809	0.143439	10.1652	2.83446e-24	5.21098e-23	ENSNFUG00015025293	sdk2b
54.0276	1.45698	0.411481	3.54083	0.000398873	0.000910523	ENSNFUG00015022906	ANGPTL4
168.503	1.45589	0.19781	7.36005	1.83835e-13	1.34115e-12	ENSNFUG00015001593
846.687	1.45516	0.548631	2.65234	0.00799353	0.0142575	ENSNFUG00015004212	vwa11
2583.71	1.45514	0.18355	7.92776	2.23127e-15	1.95291e-14	ENSNFUG00015022264	slc4a4b
104.697	1.45482	0.212125	6.85834	6.96643e-12	4.39931e-11	ENSNFUG00015005156	dlg4a
155.183	1.45453	0.271545	5.35651	8.48468e-08	3.32609e-07	ENSNFUG00015024480
67.7864	1.45367	0.499922	2.90779	0.00363998	0.00694952	ENSNFUG00015006396
125.736	1.45253	0.1585	9.1642	4.9914e-20	6.54999e-19	ENSNFUG00015024905	mier2
83.5754	1.45198	0.293133	4.95332	7.29562e-07	2.5309e-06	ENSNFUG00015011432	csrnp1a
1384.09	1.45067	0.177873	8.15566	3.47276e-16	3.24929e-15	ENSNFUG00015019688	wt1a
74.8232	1.45048	0.302791	4.79038	1.66468e-06	5.46313e-06	ENSNFUG00015005238
1028.43	1.44941	0.0765203	18.9416	5.18466e-80	1.02842e-77	ENSNFUG00015016432	ggcx
97.8781	1.4461	0.308533	4.68701	2.77232e-06	8.77125e-06	ENSNFUG00015005258	etv7
59.0988	1.44512	0.257216	5.61829	1.92853e-08	8.17759e-08	ENSNFUG00015000980	fosab
53.6935	1.44463	0.216404	6.67561	2.46213e-11	1.46824e-10	ENSNFUG00015018010
88.5184	1.44282	0.155978	9.25014	2.24194e-20	3.02847e-19	ENSNFUG00015020007	vav3b
293.634	1.44218	0.211451	6.82041	9.07822e-12	5.64587e-11	ENSNFUG00015012333	tuft1a
50.1101	1.44214	0.346221	4.16537	3.10851e-05	8.5054e-05	ENSNFUG00015019541	zp3b
264.458	1.44151	0.144574	9.97074	2.04698e-23	3.54534e-22	ENSNFUG00015013186	hectd2
1057.33	1.43957	0.0851032	16.9156	3.45158e-64	4.09066e-62	ENSNFUG00015002710	eci1
172.179	1.43929	0.196601	7.32088	2.46341e-13	1.76975e-12	ENSNFUG00015000667
272.942	1.43906	0.212875	6.76011	1.37888e-11	8.43622e-11	ENSNFUG00015007457	si:dkey-69o16.5
631.799	1.43753	0.156994	9.15659	5.35628e-20	7.00442e-19	ENSNFUG00015022873	apol1
99.7136	1.43608	0.264271	5.43414	5.50604e-08	2.20898e-07	ENSNFUG00015014884	OLA.22492
207.236	1.43604	0.210204	6.83164	8.39518e-12	5.24358e-11	ENSNFUG00015019761	myoc
6162	1.43243	0.138895	10.3131	6.15059e-25	1.1731e-23	ENSNFUG00015022789	sertad4
700.616	1.42822	0.160224	8.9139	4.92693e-19	5.8948e-18	ENSNFUG00015023865
115.009	1.42679	0.203249	7.01994	2.21968e-12	1.47436e-11	ENSNFUG00015003297	DVL3
62.8209	1.42657	0.378906	3.76498	0.000166561	0.000405304	ENSNFUG00015013881	gpr184
60.4948	1.42614	0.32918	4.3324	1.47494e-05	4.23233e-05	ENSNFUG00015019888
212.897	1.42509	0.189446	7.5224	5.37787e-14	4.1533e-13	ENSNFUG00015013868
2730.91	1.4246	0.101349	14.0563	7.04621e-45	4.24213e-43	ENSNFUG00015010128	fbxl17
249.597	1.42444	0.17794	8.00513	1.19341e-15	1.06481e-14	ENSNFUG00015007039
118.063	1.42442	0.428434	3.32471	0.000885099	0.00190267	ENSNFUG00015005263	tbx1
193.621	1.42132	0.212106	6.70099	2.07008e-11	1.24538e-10	ENSNFUG00015015337
225.88	1.42075	0.123599	11.4949	1.39963e-30	3.99943e-29	ENSNFUG00015007484	prex2
185.55	1.42067	0.146814	9.67668	3.78832e-22	5.91932e-21	ENSNFUG00015013596	ablim2
2978.04	1.42014	0.0929046	15.286	9.48621e-53	7.90965e-51	ENSNFUG00015007586	prkag2b
175.2	1.41815	0.289587	4.89717	9.72287e-07	3.3063e-06	ENSNFUG00015021408	plpp3
213.771	1.4179	0.366802	3.86558	0.000110827	0.000277726	ENSNFUG00015022914	cyp1c2
91.6243	1.41788	0.16984	8.34833	6.92339e-17	6.94698e-16	ENSNFUG00015014881
56.0353	1.41716	0.221515	6.39756	1.57879e-10	8.6134e-10	ENSNFUG00015013488	kita
268.249	1.41593	0.215116	6.58219	4.63578e-11	2.67637e-10	ENSNFUG00015015289
1591.86	1.41544	0.170592	8.29721	1.06581e-16	1.05042e-15	ENSNFUG00015006385	scpep1
127.486	1.41476	0.20491	6.9043	5.04525e-12	3.23927e-11	ENSNFUG00015003296	lmx1al
452.035	1.41465	0.206969	6.83509	8.1952e-12	5.12887e-11	ENSNFUG00015021668	hexd
239.525	1.41385	0.104527	13.5261	1.09657e-41	5.67684e-40	ENSNFUG00015008163	klhl5
123.198	1.41154	0.20629	6.84251	7.782e-12	4.88813e-11	ENSNFUG00015011952	OLA.20441
101.86	1.41069	0.222568	6.33825	2.32384e-10	1.24688e-09	ENSNFUG00015016281	ALDH1L1
52.8768	1.40957	0.311625	4.52327	6.08913e-06	1.84386e-05	ENSNFUG00015011488	cyp2y3
51.5563	1.40955	0.281438	5.00838	5.48894e-07	1.94169e-06	ENSNFUG00015007613	adamtsl5
878.684	1.40874	0.172041	8.1884	2.64726e-16	2.50679e-15	ENSNFUG00015013241	itga3b
54.6179	1.40237	0.367857	3.81227	0.000137696	0.000339804	ENSNFUG00015020884	slc6a2
200.784	1.40054	0.134932	10.3796	3.07162e-25	5.9857e-24	ENSNFUG00015003456
348.274	1.40014	0.142048	9.85676	6.40827e-23	1.06488e-21	ENSNFUG00015009271	eif4ebp1
3010.3	1.40003	0.190218	7.36013	1.83725e-13	1.34086e-12	ENSNFUG00015021863	cst14b.1
226.35	1.3995	0.185311	7.55218	4.2803e-14	3.32748e-13	ENSNFUG00015024497
113.05	1.39942	0.377682	3.7053	0.00021114	0.000505877	ENSNFUG00015010434	brinp3b
668.799	1.3982	0.160738	8.69866	3.35817e-18	3.77349e-17	ENSNFUG00015022587	nrp2a
380.251	1.39809	0.391274	3.57318	0.000352672	0.000812538	ENSNFUG00015016924	ncf2
763.087	1.39706	0.233731	5.97721	2.2699e-09	1.08015e-08	ENSNFUG00015016467	cebpd
151.678	1.39696	0.179221	7.79464	6.4593e-15	5.41455e-14	ENSNFUG00015008862	Nfu_g_1_000947
141.663	1.39679	0.176058	7.93367	2.12766e-15	1.86482e-14	ENSNFUG00015004491	igdcc4
112.021	1.39678	0.315425	4.42827	9.49934e-06	2.79871e-05	ENSNFUG00015002859
189.54	1.39659	0.232723	6.0011	1.9598e-09	9.38515e-09	ENSNFUG00015001634
82.4495	1.39617	0.332078	4.20434	2.61846e-05	7.24769e-05	ENSNFUG00015009573	si:ch211-117c9.1
212.85	1.39603	0.154426	9.04009	1.56544e-19	1.95358e-18	ENSNFUG00015023993	sall4
55.8361	1.39547	0.303584	4.59664	4.29352e-06	1.32569e-05	ENSNFUG00015016850	lratd2a
127.771	1.39492	0.357632	3.90043	9.60221e-05	0.000242976	ENSNFUG00015013523	pik3r5
78.2285	1.39384	0.216652	6.43353	1.2467e-10	6.87931e-10	ENSNFUG00015022074	fez2a
75.3579	1.39379	0.336434	4.14283	3.43043e-05	9.32665e-05	ENSNFUG00015007846	NEURL
2701.17	1.39052	0.16643	8.35497	6.54479e-17	6.58462e-16	ENSNFUG00015023661	fstl3
1305.82	1.3904	0.0828329	16.7856	3.10901e-63	3.44624e-61	ENSNFUG00015023222
65.6218	1.38622	0.155764	8.89953	5.60861e-19	6.67648e-18	ENSNFUG00015024801	pgbd5
598.858	1.38547	0.16559	8.36686	5.91758e-17	5.98556e-16	ENSNFUG00015006853
483.581	1.38525	0.118238	11.7157	1.0587e-31	3.28669e-30	ENSNFUG00015012534
304.638	1.38447	0.17336	7.98612	1.3925e-15	1.236e-14	ENSNFUG00015006229	sik1
109.591	1.38409	0.277413	4.98928	6.06057e-07	2.12911e-06	ENSNFUG00015019477	C19H9ORF91
70.2666	1.38381	0.236075	5.86175	4.58014e-09	2.0969e-08	ENSNFUG00015019031	phlda2
308.185	1.38299	0.213563	6.47582	9.42967e-11	5.27122e-10	ENSNFUG00015017491	NR0B1
332.085	1.38261	0.285965	4.83489	1.33222e-06	4.43149e-06	ENSNFUG00015007842	tgfbr3
252.651	1.38219	0.347523	3.97727	6.97124e-05	0.000180299	ENSNFUG00015018683
87.9298	1.38162	0.355665	3.88461	0.000102495	0.00025835	ENSNFUG00015014983	si:dkeyp-86f7.4
498.076	1.38129	0.301189	4.58613	4.51548e-06	1.39058e-05	ENSNFUG00015019847	lima1a
163.407	1.38125	0.155203	8.89965	5.60232e-19	6.67321e-18	ENSNFUG00015009795
341.767	1.38091	0.214836	6.42776	1.295e-10	7.13327e-10	ENSNFUG00015020686	rasgef1bb
74.3237	1.38043	0.260586	5.29739	1.17469e-07	4.52305e-07	ENSNFUG00015001104	lpin1a
97.8278	1.38007	0.153567	8.98674	2.54679e-19	3.12649e-18	ENSNFUG00015019189	TOMM40L
383.709	1.3799	0.0935404	14.7519	2.99099e-49	2.17615e-47	ENSNFUG00015023853	dmtf1
954.086	1.37961	0.46603	2.96034	0.00307297	0.00595875	ENSNFUG00015016649
331.857	1.37595	0.127892	10.7587	5.39382e-27	1.20001e-25	ENSNFUG00015012845	ccser2a
753.698	1.37447	0.0625593	21.9706	5.50552e-107	1.75841e-104	ENSNFUG00015000319	tpd52l1
1099.37	1.37225	0.117053	11.7233	9.68169e-32	3.02056e-30	ENSNFUG00015008215	dhh
109.687	1.37057	0.370883	3.69543	0.000219511	0.000524266	ENSNFUG00015006158	Nfu_g_1_018518
155.352	1.36907	0.123109	11.1208	9.93777e-29	2.46729e-27	ENSNFUG00015014663	KCNIP3
137.866	1.3661	0.209597	6.51777	7.13588e-11	4.0466e-10	ENSNFUG00015021090	irf6
173.737	1.36524	0.409101	3.33717	0.000846368	0.00182629	ENSNFUG00015006183	GPR4
121.082	1.36492	0.236433	5.77297	7.78864e-09	3.46808e-08	ENSNFUG00015025290	tie1
872.608	1.36369	0.163849	8.32282	8.58973e-17	8.5462e-16	ENSNFUG00015010162	ctsa
148.975	1.36204	0.135982	10.0163	1.2923e-23	2.28444e-22	ENSNFUG00015000947	ndst3
76.0706	1.36179	0.489522	2.78187	0.0054046	0.00997203	ENSNFUG00015013966	GNAZ
611.462	1.36178	0.165552	8.22568	1.94093e-16	1.85848e-15	ENSNFUG00015020499	Nfu_g_1_019980
301.968	1.35999	0.12487	10.8912	1.26931e-27	2.93482e-26	ENSNFUG00015014649	ptprna
168.856	1.35856	0.159608	8.51183	1.71202e-17	1.81857e-16	ENSNFUG00015018487	lrig3
172.718	1.35747	0.279587	4.85527	1.20226e-06	4.02618e-06	ENSNFUG00015012483	lamb2
1178.05	1.35663	0.129567	10.4705	1.17991e-25	2.36787e-24	ENSNFUG00015016704	tpp1
512.219	1.35505	0.258265	5.24672	1.54828e-07	5.87275e-07	ENSNFUG00015008426	si:ch1073-406l10.2
286.563	1.35475	0.189948	7.13222	9.87635e-13	6.7358e-12	ENSNFUG00015006976	NAAA
121.893	1.35223	0.150518	8.98383	2.61491e-19	3.20178e-18	ENSNFUG00015014900	mfsd12a
344.488	1.35214	0.105755	12.7856	1.97444e-37	8.14144e-36	ENSNFUG00015021983	ubald2
4241.82	1.35212	0.0791827	17.0759	2.24251e-65	2.78013e-63	ENSNFUG00015025017	cldn11a
173.219	1.35104	0.163086	8.28419	1.18917e-16	1.16409e-15	ENSNFUG00015022251	apba2a
297.699	1.34962	0.195711	6.89598	5.34959e-12	3.42533e-11	ENSNFUG00015019964	klf11b
168.474	1.34888	0.318662	4.23295	2.30648e-05	6.4352e-05	ENSNFUG00015023459	nrros
96.9526	1.34837	0.514498	2.62076	0.00877343	0.0155163	ENSNFUG00015005670	SPAM1
75.4528	1.34748	0.469251	2.87155	0.00408467	0.0077149	ENSNFUG00015000928
183.892	1.3472	0.167746	8.03116	9.65577e-16	8.67684e-15	ENSNFUG00015008558	ttc19
149.249	1.34527	0.394543	3.4097	0.00065034	0.00142966	ENSNFUG00015010990	ADAMTSL1
157.49	1.34508	0.244432	5.50287	3.73664e-08	1.53205e-07	ENSNFUG00015007192	kcnq5a
74.2163	1.34489	0.240702	5.58737	2.30537e-08	9.67968e-08	ENSNFUG00015023476
58.8458	1.34427	0.213749	6.28901	3.19494e-10	1.68407e-09	ENSNFUG00015012745
119.159	1.34352	0.296429	4.53236	5.83285e-06	1.76996e-05	ENSNFUG00015020755	fzd8a
231.296	1.34297	0.337928	3.97413	7.06372e-05	0.000182391	ENSNFUG00015009258	pde5ab
316.647	1.34201	0.246957	5.4342	5.50439e-08	2.20879e-07	ENSNFUG00015012359	slc41a1
80.3729	1.34167	0.326885	4.1044	4.05363e-05	0.000108968	ENSNFUG00015021143	bicdl1
175.531	1.3403	0.202758	6.61032	3.83481e-11	2.23518e-10	ENSNFUG00015002391
128.859	1.33961	0.424958	3.15234	0.00161966	0.00331209	ENSNFUG00015025284	ccn1
473.244	1.33768	0.349992	3.82204	0.000132353	0.000327563	ENSNFUG00015016384	abcb4
1799.97	1.33725	0.137162	9.74942	1.85519e-22	2.98287e-21	ENSNFUG00015007120	ctsla
70.6375	1.33714	0.230227	5.80792	6.32535e-09	2.85224e-08	ENSNFUG00015020785	prxl2b
133.114	1.33711	0.248285	5.38537	7.22955e-08	2.85725e-07	ENSNFUG00015006675
70.0013	1.33674	0.309778	4.31516	1.59486e-05	4.54599e-05	ENSNFUG00015004730	arhgap31
112.85	1.33629	0.330749	4.04021	5.34027e-05	0.000140469	ENSNFUG00015024098	gal3st1a
55.3564	1.33579	0.187948	7.10726	1.18374e-12	8.02963e-12	ENSNFUG00015013575
85.9526	1.3354	0.261506	5.10659	3.2803e-07	1.1947e-06	ENSNFUG00015013302
88.2567	1.33473	0.2792	4.78054	1.74829e-06	5.71857e-06	ENSNFUG00015018730
1188.79	1.33389	0.178475	7.47383	7.78956e-14	5.91881e-13	ENSNFUG00015001029	ctif
554.462	1.33345	0.207074	6.43948	1.19885e-10	6.63273e-10	ENSNFUG00015021433	arrdc2
412.212	1.33281	0.0912515	14.6059	2.57414e-48	1.80324e-46	ENSNFUG00015017011	tmem120aa
3165.61	1.33258	0.142784	9.33284	1.03072e-20	1.4366e-19	ENSNFUG00015007061
1960.29	1.33256	0.182762	7.29122	3.07151e-13	2.18331e-12	ENSNFUG00015000191	ppp1r1b
441.57	1.32973	0.179485	7.4086	1.27638e-13	9.47676e-13	ENSNFUG00015004007	TSC22D3
164.542	1.32859	0.166325	7.98787	1.37293e-15	1.2192e-14	ENSNFUG00015019873
190.909	1.32816	0.492665	2.69587	0.00702049	0.0126682	ENSNFUG00015022209	sult2st2
209.449	1.32698	0.150345	8.82628	1.08218e-18	1.26348e-17	ENSNFUG00015004967	tln2b
113.821	1.32697	0.26493	5.00878	5.47771e-07	1.93844e-06	ENSNFUG00015001333	tec
112.234	1.32667	0.309302	4.28923	1.79296e-05	5.07381e-05	ENSNFUG00015009511
4723.85	1.326	0.126977	10.4429	1.57939e-25	3.13944e-24	ENSNFUG00015020306	tuba1a
162.139	1.32557	0.169445	7.82303	5.15651e-15	4.37503e-14	ENSNFUG00015015916	klhl22
220.926	1.32364	0.115151	11.4948	1.40078e-30	3.99943e-29	ENSNFUG00015021672	si:dkey-91m11.5
380.065	1.32283	0.149539	8.84602	9.06982e-19	1.0662e-17	ENSNFUG00015009635	tmem79a
62.7086	1.32193	0.193561	6.82953	8.51906e-12	5.31743e-11	ENSNFUG00015024204
314.691	1.32173	0.16869	7.83524	4.67932e-15	3.9845e-14	ENSNFUG00015019081	jmjd7
51.3388	1.32131	0.230963	5.72087	1.05982e-08	4.64337e-08	ENSNFUG00015003403	esamb
50.4754	1.32069	0.281079	4.69864	2.61902e-06	8.31873e-06	ENSNFUG00015024431
479.207	1.32024	0.137809	9.58025	9.68116e-22	1.45248e-20	ENSNFUG00015003019	zgc:154058
546.975	1.31972	0.212296	6.21639	5.08709e-10	2.61487e-09	ENSNFUG00015003275	fhl1a
55.4635	1.31969	0.347645	3.79609	0.000146999	0.000360777	ENSNFUG00015012515	fndc5b
167.069	1.31956	0.166676	7.91693	2.43448e-15	2.12288e-14	ENSNFUG00015021700	lin7b
78.2296	1.31849	0.285104	4.6246	3.75323e-06	1.1669e-05	ENSNFUG00015004624	myom2a
52.256	1.31712	0.295049	4.46409	8.04083e-06	2.39522e-05	ENSNFUG00015000834	krt15
105.238	1.31705	0.237682	5.5412	3.00402e-08	1.24549e-07	ENSNFUG00015017242	mid1ip1a
289.585	1.31661	0.266922	4.93256	8.11601e-07	2.79389e-06	ENSNFUG00015019771
160.717	1.31633	0.155346	8.47354	2.38042e-17	2.4962e-16	ENSNFUG00015016259	pcmtd1
71.9535	1.31571	0.285289	4.61185	3.99108e-06	1.23738e-05	ENSNFUG00015000982	pcdh7b
4963.3	1.31515	0.122979	10.6941	1.08415e-26	2.33749e-25	ENSNFUG00015017432	paics
54.3648	1.31443	0.268768	4.89056	1.00549e-06	3.40966e-06	ENSNFUG00015000336	pla2g10
315.296	1.31432	0.132524	9.91762	3.48988e-23	5.95144e-22	ENSNFUG00015023711	bicc1a
190.38	1.31385	0.212764	6.17517	6.6094e-10	3.35075e-09	ENSNFUG00015007025	nfil3-5
338.081	1.31378	0.392391	3.34813	0.000813589	0.00176039	ENSNFUG00015001729	slc8a1a
92.8283	1.3124	0.162577	8.07245	6.88994e-16	6.26612e-15	ENSNFUG00015000406	mast1b
182.289	1.31233	0.140965	9.30964	1.28264e-20	1.76681e-19	ENSNFUG00015022084	cdcp1a
93.3354	1.31182	0.307199	4.27028	1.95229e-05	5.49828e-05	ENSNFUG00015016237
96.2592	1.31031	0.256205	5.11428	3.14946e-07	1.15061e-06	ENSNFUG00015011146	stard13a
195.69	1.30833	0.265493	4.92792	8.31108e-07	2.85375e-06	ENSNFUG00015020367	mef2cb
745.849	1.30684	0.105034	12.4421	1.54437e-35	5.75141e-34	ENSNFUG00015008684	gla
114.999	1.30679	0.261217	5.00271	5.6531e-07	1.99526e-06	ENSNFUG00015018981	znf362a
848.437	1.3063	0.356789	3.66126	0.000250976	0.000593474	ENSNFUG00015010258	rbpms2a
57.6535	1.3061	0.382544	3.41424	0.000639599	0.00140736	ENSNFUG00015022746
876.113	1.30591	0.177453	7.35918	1.85043e-13	1.34892e-12	ENSNFUG00015003034	plpp1a
153.133	1.30436	0.11678	11.1694	5.75925e-29	1.46461e-27	ENSNFUG00015015196	ap5s1
142.908	1.30418	0.186592	6.98945	2.75973e-12	1.81643e-11	ENSNFUG00015021128	dkk3a
176.44	1.30096	0.135275	9.61712	6.76973e-22	1.03799e-20	ENSNFUG00015002223
887.172	1.29889	0.13015	9.97995	1.86565e-23	3.23723e-22	ENSNFUG00015024863	camsap2a
81.253	1.29753	0.212722	6.09965	1.06302e-09	5.2535e-09	ENSNFUG00015003610
147.946	1.29751	0.143826	9.02142	1.85672e-19	2.30184e-18	ENSNFUG00015009886	wdsub1
650.312	1.2967	0.103402	12.5404	4.48483e-36	1.72122e-34	ENSNFUG00015018928
105.703	1.29642	0.201584	6.43115	1.26644e-10	6.98615e-10	ENSNFUG00015010181	cubn
843.688	1.29521	0.141891	9.12817	6.9667e-20	9.00415e-19	ENSNFUG00015004824	si:rp71-19m20.1
127.847	1.29365	0.236902	5.4607	4.74255e-08	1.91984e-07	ENSNFUG00015010458	gpr137ba
496.483	1.29352	0.147828	8.75018	2.13016e-18	2.42103e-17	ENSNFUG00015013852	ADARB1
1166.34	1.29035	0.199281	6.47504	9.4788e-11	5.29711e-10	ENSNFUG00015011765	AXL
63.8035	1.28956	0.21539	5.98711	2.13604e-09	1.01903e-08	ENSNFUG00015009299	slc25a34
333.888	1.28922	0.124014	10.3958	2.59239e-25	5.08336e-24	ENSNFUG00015019634	stard13b
65.0872	1.28897	0.250098	5.15387	2.55169e-07	9.44675e-07	ENSNFUG00015018470	loxl4
117.014	1.28819	0.187432	6.87282	6.29432e-12	3.99959e-11	ENSNFUG00015013697	ppfia2
79.5173	1.28703	0.199028	6.46658	1.00244e-10	5.5871e-10	ENSNFUG00015017154	rbms2b
173.345	1.28638	0.262716	4.89645	9.75822e-07	3.31681e-06	ENSNFUG00015013442	rhpn2
72.6299	1.28508	0.207799	6.18426	6.23963e-10	3.17354e-09	ENSNFUG00015009666	amph
90.032	1.28503	0.136789	9.39422	5.76453e-21	8.16742e-20	ENSNFUG00015008966
87.2124	1.28432	0.393502	3.26383	0.00109917	0.00232049	ENSNFUG00015001102	si:dkey-33c9.6
980.166	1.2841	0.0843681	15.2202	2.5983e-52	2.13809e-50	ENSNFUG00015000322	shroom3
1367.56	1.28408	0.063111	20.3464	4.99676e-92	1.23893e-89	ENSNFUG00015002618	nadk2
768.969	1.2836	0.182644	7.02788	2.09694e-12	1.39431e-11	ENSNFUG00015009292	nccrp1
54.6749	1.28356	0.237747	5.39886	6.70669e-08	2.66233e-07	ENSNFUG00015021794	slc27a2a
971.524	1.27878	0.245262	5.21394	1.84869e-07	6.95481e-07	ENSNFUG00015004619
51.5896	1.27698	0.245141	5.20917	1.89686e-07	7.12182e-07	ENSNFUG00015015833
53.852	1.27652	0.404304	3.15732	0.00159228	0.00325893	ENSNFUG00015020365	prr5a
552.059	1.27563	0.250756	5.08713	3.63527e-07	1.31559e-06	ENSNFUG00015011418	synm
62.1989	1.2751	0.220788	5.7752	7.68611e-09	3.42647e-08	ENSNFUG00015016547	p2rx5
117.553	1.27507	0.14065	9.06559	1.23929e-19	1.55792e-18	ENSNFUG00015012911	mtfr2
385.477	1.27476	0.40364	3.15816	0.00158771	0.00325099	ENSNFUG00015010382	Nfu_g_1_022803
360.317	1.27453	0.291125	4.37794	1.19805e-05	3.48128e-05	ENSNFUG00015008575	ANOS1
79.8153	1.27135	0.273704	4.64498	3.40107e-06	1.06355e-05	ENSNFUG00015017410	RARG
87.3301	1.26995	0.254089	4.99805	5.79132e-07	2.04137e-06	ENSNFUG00015016069	b4galt3
65.4105	1.2695	0.458951	2.76608	0.0056734	0.0104221	ENSNFUG00015023617	chrm3a
91.3973	1.26895	0.192597	6.58863	4.43912e-11	2.56597e-10	ENSNFUG00015019273	cbx8a
51.7904	1.26804	0.516077	2.45707	0.0140075	0.0237372	ENSNFUG00015018130	si:ch211-236l14.4
73.1272	1.26669	0.328655	3.85415	0.000116132	0.000289969	ENSNFUG00015017505	cap2
61.0492	1.26566	0.414128	3.0562	0.0022416	0.00445295	ENSNFUG00015016457
372.757	1.2654	0.123569	10.2404	1.30716e-24	2.44367e-23	ENSNFUG00015000291
673.106	1.26494	0.128994	9.80619	1.05889e-22	1.7321e-21	ENSNFUG00015003977	SERPINA10A
800.692	1.2646	0.120486	10.4958	9.03514e-26	1.83073e-24	ENSNFUG00015015656	sgpl1
734.266	1.26439	0.201671	6.26954	3.62111e-10	1.89229e-09	ENSNFUG00015006483	irs2b
419.579	1.26378	0.233117	5.42122	5.91944e-08	2.36477e-07	ENSNFUG00015000209
61.9595	1.26344	0.199911	6.32004	2.61498e-10	1.39515e-09	ENSNFUG00015006668	nsg2
549.737	1.26334	0.395127	3.19731	0.00138717	0.0028722	ENSNFUG00015006267	vcam1b
177.897	1.26326	0.179639	7.03225	2.03234e-12	1.35231e-11	ENSNFUG00015022192	BHLHE40
197.415	1.26308	0.228457	5.52873	3.22556e-08	1.3309e-07	ENSNFUG00015019812	ano10b
1246.27	1.26245	0.265934	4.74724	2.06213e-06	6.68021e-06	ENSNFUG00015023018	tcn2
351.14	1.26197	0.259449	4.86405	1.15011e-06	3.86252e-06	ENSNFUG00015011338	slc2a1b
395.07	1.26138	0.121569	10.3758	3.19477e-25	6.20002e-24	ENSNFUG00015008191	si:ch73-236j9.2
208.554	1.26027	0.263757	4.77813	1.7693e-06	5.78431e-06	ENSNFUG00015004359	fbxo32
70.4089	1.26017	0.199616	6.31296	2.73748e-10	1.45679e-09	ENSNFUG00015019432	stx11a
56.5711	1.26014	0.32137	3.92116	8.81251e-05	0.000224107	ENSNFUG00015000222	traf4a
809	1.25944	0.173632	7.25349	4.06156e-13	2.84944e-12	ENSNFUG00015011300	atp6v0a1b
326.414	1.25835	0.113895	11.0483	2.23313e-28	5.42084e-27	ENSNFUG00015008574	abhd17b
290.019	1.25782	0.187072	6.72374	1.7712e-11	1.07423e-10	ENSNFUG00015001418	MAFG
4364.64	1.25712	0.182973	6.8705	6.39759e-12	4.06187e-11	ENSNFUG00015019151	anxa1a
330.943	1.25276	0.423601	2.95741	0.00310238	0.00601143	ENSNFUG00015022552
82.9794	1.25206	0.234563	5.33786	9.40489e-08	3.66547e-07	ENSNFUG00015015886
73.8527	1.25122	0.315243	3.96908	7.21505e-05	0.000186171	ENSNFUG00015004963	IGFBP4
55.1408	1.24779	0.336753	3.70537	0.000211084	0.000505871	ENSNFUG00015013070
947.722	1.24727	0.163264	7.63959	2.17911e-14	1.74811e-13	ENSNFUG00015000673	rbm47
258.067	1.24726	0.124661	10.0052	1.44611e-23	2.54203e-22	ENSNFUG00015013281	tiam1b
2396.78	1.24704	0.106133	11.7498	7.08273e-32	2.22816e-30	ENSNFUG00015009699	ikbkg
96.5593	1.24689	0.179211	6.95765	3.46003e-12	2.25764e-11	ENSNFUG00015013058
77.7498	1.24609	0.213345	5.84071	5.19786e-09	2.36877e-08	ENSNFUG00015024751	gsg1l2b
688.915	1.24609	0.272597	4.57116	4.85034e-06	1.48642e-05	ENSNFUG00015014696	C1QA
77.503	1.24556	0.198207	6.28412	3.29709e-10	1.73355e-09	ENSNFUG00015004625
91.6371	1.24502	0.370425	3.36104	0.000776488	0.00168573	ENSNFUG00015021120	tnnc2.2
439.947	1.24501	0.143668	8.66587	4.48092e-18	4.97011e-17	ENSNFUG00015004856
370.912	1.24358	0.232018	5.35985	8.32907e-08	3.26849e-07	ENSNFUG00015017667
116.799	1.24343	0.271142	4.58592	4.52002e-06	1.39152e-05	ENSNFUG00015007993	SLC39A1
130.166	1.24249	0.230453	5.39148	6.98794e-08	2.76815e-07	ENSNFUG00015020074	NPY2R
150.652	1.24182	0.202858	6.1216	9.26396e-10	4.62315e-09	ENSNFUG00015022988
221.985	1.24121	0.10635	11.671	1.79298e-31	5.50276e-30	ENSNFUG00015008652	MPV17L
330.165	1.24078	0.194284	6.38639	1.69845e-10	9.23947e-10	ENSNFUG00015015320
261.308	1.24017	0.241848	5.12788	2.93028e-07	1.07554e-06	ENSNFUG00015010070	gadd45ga
135.075	1.23959	0.178964	6.92648	4.31447e-12	2.78622e-11	ENSNFUG00015019954	PLCD3
70.3797	1.23918	0.403131	3.07389	0.00211285	0.0042172	ENSNFUG00015021584	klhl43
1797.77	1.23917	0.0979969	12.645	1.19195e-36	4.69899e-35	ENSNFUG00015006327
167.685	1.23869	0.177731	6.96947	3.18138e-12	2.08087e-11	ENSNFUG00015004648	dmgdh
920.929	1.23821	0.13381	9.25346	2.1735e-20	2.94446e-19	ENSNFUG00015018565
94.6342	1.23756	0.140333	8.81877	1.15724e-18	1.34529e-17	ENSNFUG00015015145	acot11b
704.681	1.23726	0.284291	4.35208	1.34852e-05	3.89629e-05	ENSNFUG00015015866
63.7856	1.23676	0.347537	3.55865	0.000372771	0.00085602	ENSNFUG00015024607
61.4009	1.23654	0.169943	7.27623	3.43289e-13	2.43102e-12	ENSNFUG00015016182	gabra5
569.695	1.23561	0.0971601	12.7173	4.73944e-37	1.91242e-35	ENSNFUG00015015349	asah1b
158.298	1.23389	0.278487	4.4307	9.39288e-06	2.77125e-05	ENSNFUG00015004199	CLMP
338.743	1.23316	0.148179	8.32206	8.64484e-17	8.59648e-16	ENSNFUG00015020808	errfi1a
119.757	1.23283	0.214002	5.76085	8.3691e-09	3.70902e-08	ENSNFUG00015013583	slc12a10.1
77.8016	1.23268	0.501204	2.45943	0.0139156	0.0236005	ENSNFUG00015016092	marveld2b
115.999	1.23258	0.272712	4.51971	6.1923e-06	1.873e-05	ENSNFUG00015006661	ZNF521
454.332	1.23204	0.194791	6.32494	2.53337e-10	1.35468e-09	ENSNFUG00015006578	pgr
152.584	1.23073	0.333218	3.69347	0.000221213	0.000527797	ENSNFUG00015020529	mcf2la
408.05	1.23047	0.0950403	12.9469	2.44793e-38	1.0678e-36	ENSNFUG00015022349	TGOLN2
240.762	1.23036	0.149347	8.23822	1.74786e-16	1.68224e-15	ENSNFUG00015022187
139.741	1.23028	0.166411	7.39303	1.43522e-13	1.0577e-12	ENSNFUG00015005517
80.1587	1.22912	0.231238	5.3154	1.06423e-07	4.12385e-07	ENSNFUG00015022344
52.1751	1.22776	0.203724	6.02658	1.67468e-09	8.0834e-09	ENSNFUG00015016800
79.3287	1.22687	0.260057	4.7177	2.38531e-06	7.64306e-06	ENSNFUG00015022515	rgmb
1459.62	1.22666	0.0693361	17.6916	4.86923e-70	7.11285e-68	ENSNFUG00015006968	tyk2
478.527	1.22644	0.270531	4.53345	5.80292e-06	1.76172e-05	ENSNFUG00015003805	sh3bp2
81.865	1.22625	0.303652	4.03834	5.38299e-05	0.000141395	ENSNFUG00015024742	tnika
1478.35	1.22539	0.172602	7.09948	1.25224e-12	8.46078e-12	ENSNFUG00015022203	ca6
100.591	1.22522	0.302607	4.04887	5.1466e-05	0.000135792	ENSNFUG00015013450
52.9478	1.22518	0.179791	6.81444	9.4631e-12	5.87748e-11	ENSNFUG00015008655
65.9279	1.22512	0.215444	5.68647	1.29693e-08	5.62211e-08	ENSNFUG00015004329
608.021	1.22501	0.0784984	15.6056	6.66868e-55	5.92757e-53	ENSNFUG00015008541	pak4
138.242	1.22472	0.121082	10.1148	4.74959e-24	8.63911e-23	ENSNFUG00015021175	MFAP3
75.6967	1.22251	0.253856	4.81577	1.46636e-06	4.84944e-06	ENSNFUG00015012506
94.7515	1.22107	0.267705	4.56126	5.08476e-06	1.55421e-05	ENSNFUG00015016806	OTOR
520.929	1.22103	0.0980067	12.4586	1.25496e-35	4.70148e-34	ENSNFUG00015008346	CLCN2
75.9419	1.22058	0.159447	7.65505	1.93239e-14	1.55416e-13	ENSNFUG00015016357	ydjc
157.333	1.2203	0.157247	7.76041	8.4657e-15	7.02765e-14	ENSNFUG00015016681	SYNDIG1L
84.0177	1.21925	0.453842	2.68652	0.00722013	0.0129961	ENSNFUG00015021180	chrm5a
96.1192	1.21908	0.307386	3.96595	7.31047e-05	0.000188529	ENSNFUG00015017210	igfbp5b
388.612	1.21885	0.212845	5.72646	1.0255e-08	4.49932e-08	ENSNFUG00015021711	dgat1a
89.443	1.21816	0.323867	3.76129	0.00016904	0.000410913	ENSNFUG00015007363	wnt5a
331.443	1.21777	0.290037	4.19867	2.68483e-05	7.41724e-05	ENSNFUG00015002769	slc7a9
274.747	1.21713	0.189096	6.43656	1.22214e-10	6.75567e-10	ENSNFUG00015019974	arhgef2b
787.077	1.21711	0.125777	9.67676	3.78525e-22	5.91932e-21	ENSNFUG00015008945	Nfu_g_1_010791
255.909	1.21692	0.183436	6.63402	3.26667e-11	1.91647e-10	ENSNFUG00015003583	asap2b
115.559	1.2163	0.175467	6.93177	4.15603e-12	2.69128e-11	ENSNFUG00015014550
97.4249	1.21557	0.246327	4.93477	8.02464e-07	2.76699e-06	ENSNFUG00015001397	IL31RA
68.5341	1.2155	0.196927	6.17232	6.72942e-10	3.40793e-09	ENSNFUG00015014270	cln5
853.081	1.21418	0.201267	6.03265	1.6129e-09	7.79922e-09	ENSNFUG00015015397	pygl
107.253	1.21354	0.428231	2.83385	0.00459912	0.0085944	ENSNFUG00015016608	slc38a3a
192.64	1.21312	0.288549	4.2042	2.62013e-05	7.25123e-05	ENSNFUG00015010653	si:ch73-182e20.4
199.613	1.21205	0.215179	5.63273	1.77378e-08	7.55541e-08	ENSNFUG00015022136	ptprea
155.887	1.21181	0.177839	6.81408	9.48688e-12	5.89031e-11	ENSNFUG00015010734	zbtb7b
100.36	1.21143	0.374483	3.23494	0.00121668	0.00254859	ENSNFUG00015004482	scamp5b
168.059	1.21107	0.512021	2.36528	0.0180164	0.0298646	ENSNFUG00015000960
393.637	1.21048	0.253452	4.77598	1.78839e-06	5.8356e-06	ENSNFUG00015012459	lsr
74.1916	1.21046	0.404009	2.99612	0.00273441	0.00534848	ENSNFUG00015002406	cldn5b
262.358	1.21039	0.227694	5.31586	1.06157e-07	4.11441e-07	ENSNFUG00015016893	cldn5a
133.493	1.2092	0.280288	4.31414	1.60224e-05	4.56635e-05	ENSNFUG00015010037	TLR5
288.694	1.20911	0.228221	5.298	1.17081e-07	4.50995e-07	ENSNFUG00015001010	zbtb7c
60.5639	1.20639	0.3069	3.93091	8.46264e-05	0.000215879	ENSNFUG00015024695	pappa2
147.551	1.20417	0.141433	8.51406	1.67947e-17	1.78601e-16	ENSNFUG00015023907	kbtbd11
1346.18	1.20379	0.140741	8.55321	1.19709e-17	1.28755e-16	ENSNFUG00015000508	ctsf
1390.69	1.20262	0.141483	8.50014	1.89361e-17	2.00249e-16	ENSNFUG00015007655	ctsz
169.891	1.20242	0.205919	5.83927	5.24293e-09	2.38815e-08	ENSNFUG00015018540
473.718	1.20191	0.125415	9.58343	9.38757e-22	1.41181e-20	ENSNFUG00015012919	dcxr
71.2674	1.20158	0.250952	4.7881	1.68368e-06	5.51971e-06	ENSNFUG00015012024	tp53inp1
144.905	1.20135	0.157758	7.61512	2.63455e-14	2.10006e-13	ENSNFUG00015004950
318.114	1.20086	0.449063	2.67415	0.00749185	0.0134466	ENSNFUG00015005256	ppp1r12b
170.79	1.20073	0.137077	8.75956	1.96017e-18	2.23457e-17	ENSNFUG00015008515	igsf3
152.742	1.20042	0.393477	3.0508	0.00228236	0.00452621	ENSNFUG00015007326	TNFAIP2
119.655	1.20021	0.146436	8.19618	2.48155e-16	2.35341e-15	ENSNFUG00015014157	cacna1da
229.639	1.1994	0.209877	5.71478	1.09849e-08	4.80278e-08	ENSNFUG00015025201	CFLAR
118.114	1.19756	0.336025	3.56391	0.000365367	0.000840246	ENSNFUG00015020228
606.742	1.19733	0.163946	7.30324	2.80927e-13	2.00522e-12	ENSNFUG00015022816	cd302
1350.11	1.19641	0.102934	11.6231	3.14663e-31	9.51768e-30	ENSNFUG00015001047	aifm4
119.951	1.19625	0.246056	4.86169	1.16385e-06	3.90591e-06	ENSNFUG00015015246	zgc:154055
67.9269	1.19587	0.324202	3.68865	0.000225444	0.000537144	ENSNFUG00015024109
82.193	1.19548	0.151842	7.87321	3.45665e-15	2.98521e-14	ENSNFUG00015000898	mb21d2
87.1795	1.1948	0.162417	7.35637	1.88986e-13	1.37553e-12	ENSNFUG00015001276	glra3
68.0256	1.19455	0.364859	3.27401	0.00106033	0.00224503	ENSNFUG00015024215	sspn
220.613	1.1944	0.245697	4.86127	1.16637e-06	3.91364e-06	ENSNFUG00015021800	slc7a1a
100.962	1.19437	0.12435	9.6049	7.62315e-22	1.16128e-20	ENSNFUG00015004119	cgrrf1
281.494	1.19363	0.104098	11.4664	1.94572e-30	5.49703e-29	ENSNFUG00015004138	lpin1b
573.668	1.19264	0.143371	8.31855	8.90488e-17	8.84573e-16	ENSNFUG00015019078	pla2g15
195.409	1.19261	0.131038	9.1013	8.92553e-20	1.14029e-18	ENSNFUG00015019214	itih3b.1
117.502	1.1926	0.311651	3.82672	0.000129862	0.000321819	ENSNFUG00015021242	jam2b
238.809	1.19215	0.190102	6.2711	3.58515e-10	1.87663e-09	ENSNFUG00015007411
199.107	1.19207	0.281293	4.23783	2.25693e-05	6.30253e-05	ENSNFUG00015021154	rgs3a
581.536	1.1919	0.098889	12.0529	1.8721e-33	6.29962e-32	ENSNFUG00015011265	pim1
58.9504	1.19177	0.251785	4.73329	2.20909e-06	7.12445e-06	ENSNFUG00015006500	arhgef19
746.439	1.19175	0.106952	11.1428	7.76282e-29	1.94784e-27	ENSNFUG00015022663	pdf
108.366	1.1907	0.173726	6.8539	7.18642e-12	4.53368e-11	ENSNFUG00015016851	dnajc5aa
135.042	1.19051	0.287161	4.14579	3.38646e-05	9.21773e-05	ENSNFUG00015009275	prickle1a
90.0309	1.19011	0.245046	4.85669	1.19366e-06	3.9988e-06	ENSNFUG00015023426
1769.7	1.19007	0.093659	12.7064	5.44686e-37	2.17921e-35	ENSNFUG00015021355	COMTD1
231.826	1.18921	0.10624	11.1936	4.38249e-29	1.12512e-27	ENSNFUG00015015602
97.4237	1.18797	0.343075	3.46272	0.000534739	0.00119292	ENSNFUG00015018988
106.762	1.18655	0.254758	4.65757	3.19965e-06	1.00457e-05	ENSNFUG00015019803
59.0902	1.18552	0.167772	7.06629	1.5913e-12	1.06866e-11	ENSNFUG00015023813	radil2b
234.257	1.18493	0.157554	7.52076	5.44586e-14	4.20409e-13	ENSNFUG00015019375	si:ch211-120g10.1
127.92	1.18462	0.178542	6.63496	3.24595e-11	1.90491e-10	ENSNFUG00015015794	adgrl2a
686.233	1.18451	0.144813	8.17955	2.84917e-16	2.68717e-15	ENSNFUG00015021987	minpp1a
146.445	1.1845	0.293097	4.04134	5.31468e-05	0.000139933	ENSNFUG00015018384	f2rl2
204.963	1.18431	0.363886	3.25462	0.00113546	0.00239014	ENSNFUG00015011513	si:dkey-9k7.3
106.269	1.1831	0.137498	8.60452	7.66378e-18	8.34811e-17	ENSNFUG00015012502	SRRM3
303.582	1.18241	0.183349	6.44896	1.12619e-10	6.25095e-10	ENSNFUG00015003599	IER2
388.143	1.18218	0.269172	4.3919	1.12364e-05	3.27667e-05	ENSNFUG00015021965	gas1a
132.441	1.18201	0.121455	9.73208	2.20057e-22	3.51896e-21	ENSNFUG00015018085	ppm1h
72.7111	1.18186	0.187352	6.30823	2.82236e-10	1.49901e-09	ENSNFUG00015016197	zmiz1b
15560.8	1.18141	0.120488	9.80521	1.06926e-22	1.74754e-21	ENSNFUG00015003452
112.168	1.1809	0.14655	8.058	7.75499e-16	7.02235e-15	ENSNFUG00015016375
569.763	1.18081	0.282746	4.17623	2.96376e-05	8.13528e-05	ENSNFUG00015001836	capgb
113.674	1.1803	0.168511	7.00431	2.4821e-12	1.64115e-11	ENSNFUG00015020599	ccnp
110.404	1.17974	0.134881	8.74654	2.19993e-18	2.49882e-17	ENSNFUG00015006066	usp18
727.404	1.17933	0.169835	6.94397	3.81238e-12	2.47811e-11	ENSNFUG00015002350
1086.84	1.17889	0.179953	6.55111	5.71102e-11	3.26909e-10	ENSNFUG00015023300	nfe2l2a
715.139	1.1783	0.0919078	12.8204	1.26009e-37	5.25333e-36	ENSNFUG00015011608	cry2
128.679	1.17802	0.197997	5.94971	2.68623e-09	1.26454e-08	ENSNFUG00015021335	OLA.10274
96.8461	1.17632	0.205179	5.73313	9.85958e-09	4.33288e-08	ENSNFUG00015024939	camkk1a
220.8	1.17544	0.190125	6.18246	6.31084e-10	3.20803e-09	ENSNFUG00015005839	rab11fip5a
150.125	1.17516	0.202108	5.81453	6.08054e-09	2.75106e-08	ENSNFUG00015007255	dmrt3a
398.717	1.17462	0.0792214	14.827	9.79745e-50	7.24012e-48	ENSNFUG00015000360	PRKCSH
145.082	1.17386	0.199588	5.88143	4.06749e-09	1.87449e-08	ENSNFUG00015010411	egln3
388.786	1.17345	0.111898	10.4869	9.92713e-26	2.00931e-24	ENSNFUG00015016601
61.1173	1.17009	0.363772	3.21656	0.00129739	0.00270262	ENSNFUG00015014315
184.407	1.16979	0.121145	9.65611	4.63129e-22	7.18288e-21	ENSNFUG00015000052	gas2l3
133.822	1.16932	0.269969	4.33133	1.48213e-05	4.25104e-05	ENSNFUG00015003931
120.212	1.16804	0.286432	4.0779	4.54436e-05	0.000120935	ENSNFUG00015008532	klhl6
219.73	1.16797	0.256455	4.55428	5.25648e-06	1.60202e-05	ENSNFUG00015007078	pde4ba
636.728	1.16769	0.105939	11.0222	2.98511e-28	7.16578e-27	ENSNFUG00015000614	ttyh3b
62.1313	1.16711	0.426821	2.73443	0.00624884	0.0113991	ENSNFUG00015017256	cspg5a
134.002	1.1671	0.222036	5.25634	1.46951e-07	5.59083e-07	ENSNFUG00015016236
302.935	1.16661	0.13457	8.66918	4.35247e-18	4.84168e-17	ENSNFUG00015019496
55.9516	1.16566	0.224405	5.19446	2.05312e-07	7.68707e-07	ENSNFUG00015002863	nr3c2
290.539	1.16465	0.228533	5.0962	3.46546e-07	1.25752e-06	ENSNFUG00015013422	adam28
549.722	1.164	0.186943	6.22651	4.76931e-10	2.46092e-09	ENSNFUG00015008795	gpm6bb
94.6893	1.16383	0.221686	5.24992	1.52165e-07	5.77521e-07	ENSNFUG00015001210	prlra
69.5143	1.16339	0.160584	7.24472	4.33329e-13	3.03218e-12	ENSNFUG00015008612	ARF3
436.605	1.16318	0.16992	6.84548	7.62222e-12	4.79577e-11	ENSNFUG00015023151
73.3162	1.16317	0.368899	3.15308	0.0016156	0.00330414	ENSNFUG00015000069	hlx1
356.895	1.16287	0.16251	7.15566	8.3271e-13	5.71226e-12	ENSNFUG00015002323	glod5
154.573	1.16212	0.127035	9.14803	5.79801e-20	7.54542e-19	ENSNFUG00015014484
319.888	1.16179	0.172895	6.71966	1.82154e-11	1.10334e-10	ENSNFUG00015014505	osgn1
91.4181	1.16106	0.294069	3.94827	7.8717e-05	0.000201733	ENSNFUG00015021680	cybc1
175.558	1.16039	0.204601	5.6715	1.41552e-08	6.1053e-08	ENSNFUG00015021006	b4gat1
322.31	1.1594	0.187169	6.19442	5.84995e-10	2.98825e-09	ENSNFUG00015017245	bcor
356.847	1.15888	0.285679	4.05657	4.97997e-05	0.000131746	ENSNFUG00015024373	meis1b
182.072	1.15702	0.220645	5.24381	1.57293e-07	5.95903e-07	ENSNFUG00015017987	plxdc2b
136.025	1.15689	0.199875	5.78804	7.12115e-09	3.18971e-08	ENSNFUG00015004647	pacsin3
540.96	1.15663	0.154165	7.50252	6.2602e-14	4.79346e-13	ENSNFUG00015019234	phf21b
98.5395	1.15645	0.221051	5.23159	1.68058e-07	6.3452e-07	ENSNFUG00015009394	lpar6a
201.355	1.15645	0.180439	6.40907	1.46412e-10	8.00634e-10	ENSNFUG00015005100	tmem110l
5851.95	1.15608	0.11578	9.98513	1.77063e-23	3.08942e-22	ENSNFUG00015005395	BRD2
846.198	1.15587	0.427927	2.70111	0.00691095	0.0124969	ENSNFUG00015011184	ptgdsb.2
429.198	1.15541	0.126549	9.13009	6.84455e-20	8.86451e-19	ENSNFUG00015010831	nipsnap1
350.228	1.15538	0.310277	3.72369	0.00019633	0.000472677	ENSNFUG00015022441	pex11b
87.6991	1.15512	0.297918	3.8773	0.000105623	0.000265665	ENSNFUG00015020717	cyp2r1
156.447	1.15497	0.203713	5.66958	1.43148e-08	6.17131e-08	ENSNFUG00015004255	gpr75
167.072	1.15401	0.225037	5.12808	2.92718e-07	1.07461e-06	ENSNFUG00015020418	laynb
75.9349	1.15289	0.211553	5.44966	5.04651e-08	2.03458e-07	ENSNFUG00015007445	atf3
209.092	1.15228	0.176314	6.53538	6.34488e-11	3.61436e-10	ENSNFUG00015003888	rbms1a
160.707	1.15221	0.535116	2.1532	0.0313033	0.0493582	ENSNFUG00015020392	GGT5
836.329	1.15162	0.140907	8.17292	3.01012e-16	2.83189e-15	ENSNFUG00015015906	hdac7b
336.289	1.15141	0.191195	6.02217	1.72092e-09	8.29812e-09	ENSNFUG00015022351	CLEP
141.46	1.14875	0.128208	8.96003	3.24599e-19	3.9336e-18	ENSNFUG00015008283
612.725	1.14793	0.0832912	13.7821	3.26442e-43	1.80395e-41	ENSNFUG00015022401	pld1b
210.929	1.14783	0.113806	10.0858	6.38195e-24	1.14973e-22	ENSNFUG00015013937	kif1aa
435.69	1.14712	0.195169	5.8776	4.16248e-09	1.91358e-08	ENSNFUG00015009415	LHFPL6
397.969	1.14685	0.163692	7.00613	2.45006e-12	1.62053e-11	ENSNFUG00015024806	fkbp10b
921.831	1.14629	0.19598	5.849	4.94552e-09	2.25704e-08	ENSNFUG00015016483	cd9a
57.3619	1.14538	0.307132	3.72928	0.000192024	0.000462961	ENSNFUG00015024929	dact2
270.021	1.14406	0.258112	4.43241	9.31836e-06	2.75185e-05	ENSNFUG00015018482	MPEG1
147.389	1.1437	0.16734	6.83457	8.2253e-12	5.14429e-11	ENSNFUG00015017107	b4galnt3b
190.577	1.14342	0.104909	10.8991	1.16355e-27	2.70691e-26	ENSNFUG00015003850	slc26a2
890.427	1.14194	0.152715	7.47759	7.56964e-14	5.761e-13	ENSNFUG00015023532	sftpbb
230.811	1.14191	0.174063	6.56029	5.37019e-11	3.08055e-10	ENSNFUG00015018204	ctnnd2a
52.5925	1.14097	0.212465	5.37016	7.86663e-08	3.09799e-07	ENSNFUG00015005337	CABZ01002626.1
160.206	1.14023	0.166147	6.86279	6.75298e-12	4.27311e-11	ENSNFUG00015011438	EMP1
447.169	1.13957	0.127494	8.93822	3.95494e-19	4.76211e-18	ENSNFUG00015011946	efnb1
419.233	1.13943	0.119965	9.49806	2.13836e-21	3.12608e-20	ENSNFUG00015020957	ing5a
272.796	1.13929	0.118804	9.58966	8.83797e-22	1.33341e-20	ENSNFUG00015019689	TIMP3
448.279	1.13824	0.172029	6.61659	3.67568e-11	2.14574e-10	ENSNFUG00015014362
157.921	1.1381	0.199527	5.704	1.1703e-08	5.09899e-08	ENSNFUG00015024592
142.895	1.13795	0.119713	9.50569	1.98718e-21	2.91412e-20	ENSNFUG00015010332
1830.43	1.13785	0.149452	7.61348	2.66804e-14	2.12496e-13	ENSNFUG00015010965	RNF219
54.7328	1.13757	0.221684	5.13149	2.87451e-07	1.05692e-06	ENSNFUG00015012547	jdp2a
120.289	1.13743	0.143857	7.90666	2.64379e-15	2.29689e-14	ENSNFUG00015017700	trim36
111.069	1.13635	0.287512	3.95237	7.73795e-05	0.000198548	ENSNFUG00015019006	CYGB
417.548	1.13616	0.309848	3.66684	0.000245562	0.000581329	ENSNFUG00015016402	myo1f
121.614	1.13587	0.190941	5.94881	2.70091e-09	1.27113e-08	ENSNFUG00015006909	znf512
60.9108	1.13508	0.305661	3.71351	0.000204408	0.000490934	ENSNFUG00015001569	C1QL2
54.998	1.13447	0.45942	2.46934	0.0135362	0.0230192	ENSNFUG00015004337	atp8b1
132.09	1.13375	0.276604	4.09881	4.15286e-05	0.000111477	ENSNFUG00015011955	mycn
207.092	1.13288	0.190453	5.94833	2.70895e-09	1.27459e-08	ENSNFUG00015025021
117.436	1.13168	0.359322	3.14949	0.00163554	0.00334216	ENSNFUG00015008598
441.598	1.13162	0.156913	7.21176	5.52344e-13	3.83507e-12	ENSNFUG00015009410	elf1
220.376	1.13149	0.137093	8.2534	1.53948e-16	1.48999e-15	ENSNFUG00015019738	rassf6
531.887	1.12983	0.121542	9.2958	1.46107e-20	2.00381e-19	ENSNFUG00015015469
81.3184	1.12885	0.190074	5.93901	2.86756e-09	1.34452e-08	ENSNFUG00015024399
508.504	1.12616	0.148426	7.58734	3.26529e-14	2.57668e-13	ENSNFUG00015011229
365.409	1.12579	0.0863948	13.0307	8.18073e-39	3.65302e-37	ENSNFUG00015004382	sez6l
83.3313	1.12534	0.18889	5.95764	2.55901e-09	1.20736e-08	ENSNFUG00015024623	btbd11b
108.22	1.12453	0.205059	5.48394	4.15967e-08	1.69554e-07	ENSNFUG00015001835	ccbe1
69.5451	1.12424	0.275597	4.07929	4.51728e-05	0.000120316	ENSNFUG00015020644	Nfu_g_1_021288
58.335	1.12393	0.18828	5.96946	2.38038e-09	1.12816e-08	ENSNFUG00015018709	gng10
90.2368	1.12388	0.152875	7.35163	1.9581e-13	1.423e-12	ENSNFUG00015020172	fbxl2
288.877	1.12328	0.127855	8.78555	1.556e-18	1.7868e-17	ENSNFUG00015003704	camk2g2
120.017	1.12254	0.275423	4.07569	4.58779e-05	0.000122039	ENSNFUG00015014242	slc44a5b
363.961	1.12216	0.119144	9.41847	4.57694e-21	6.52405e-20	ENSNFUG00015017638	plce1
77.5643	1.12201	0.494172	2.27048	0.0231784	0.0375719	ENSNFUG00015012807
221.791	1.12187	0.167734	6.68837	2.25666e-11	1.35256e-10	ENSNFUG00015012087
879.48	1.121	0.178709	6.27277	3.54684e-10	1.85709e-09	ENSNFUG00015017052	si:ch211-195b13.1
98.9026	1.12097	0.32719	3.42605	0.000612438	0.00135312	ENSNFUG00015024400	CABZ01088025.1
63.8632	1.11901	0.176084	6.35501	2.08418e-10	1.12341e-09	ENSNFUG00015010212	slc25a15a
208.072	1.11858	0.197635	5.65981	1.51537e-08	6.51804e-08	ENSNFUG00015016431	rgl1
150.74	1.11758	0.194666	5.74099	9.41267e-09	4.14906e-08	ENSNFUG00015006446	Nfu_g_1_023007
109.33	1.11702	0.219831	5.08125	3.7495e-07	1.35356e-06	ENSNFUG00015007047	myo1eb
216.991	1.11662	0.137001	8.15048	3.62497e-16	3.38666e-15	ENSNFUG00015007953	pmepa1
592.508	1.11329	0.139889	7.95835	1.74347e-15	1.53523e-14	ENSNFUG00015020283	poc1bl
338.592	1.11308	0.124337	8.95206	3.48896e-19	4.21449e-18	ENSNFUG00015013981	amotl2b
54.8803	1.11306	0.237341	4.68971	2.73589e-06	8.66618e-06	ENSNFUG00015021889	zdhhc23b
221.771	1.11254	0.143864	7.73331	1.04782e-14	8.63362e-14	ENSNFUG00015019389
640.954	1.11236	0.183368	6.06628	1.30909e-09	6.39266e-09	ENSNFUG00015017696	npr1a
766.145	1.11091	0.099693	11.1433	7.72238e-29	1.94027e-27	ENSNFUG00015004232	ttc9c
162.818	1.11039	0.121944	9.10579	8.56392e-20	1.09707e-18	ENSNFUG00015002172
50.518	1.10864	0.291053	3.80908	0.000139487	0.000343953	ENSNFUG00015005250	zgc:194242
392.994	1.10834	0.16208	6.83822	8.01812e-12	5.0264e-11	ENSNFUG00015005552	slco2b1
439.415	1.10676	0.119877	9.23254	2.64301e-20	3.54735e-19	ENSNFUG00015011940	samm50
411.489	1.10651	0.0840484	13.1652	1.392e-39	6.50887e-38	ENSNFUG00015024250	HID1
214.292	1.10626	0.0882601	12.534	4.86192e-36	1.86215e-34	ENSNFUG00015003588
163.009	1.10606	0.137139	8.06522	7.31024e-16	6.62598e-15	ENSNFUG00015011973
299.374	1.10547	0.249612	4.42875	9.47828e-06	2.79294e-05	ENSNFUG00015015152	CDH4
115.463	1.10514	0.15519	7.12122	1.06977e-12	7.27749e-12	ENSNFUG00015021760	zgc:100829
880.626	1.10462	0.112269	9.83913	7.63673e-23	1.26013e-21	ENSNFUG00015002804	slc6a16a
161.444	1.10453	0.232116	4.75853	1.95005e-06	6.33784e-06	ENSNFUG00015018700	pkmb
71.0257	1.10439	0.503004	2.19558	0.028122	0.0447766	ENSNFUG00015015868	trpv1
298.978	1.10313	0.237503	4.6447	3.40574e-06	1.06466e-05	ENSNFUG00015025123	tns2a
51.86	1.10308	0.283324	3.89334	9.8875e-05	0.000249692	ENSNFUG00015016558	slc4a11
180.231	1.10257	0.202968	5.43225	5.56469e-08	2.23109e-07	ENSNFUG00015015992
50.132	1.10239	0.228912	4.81578	1.46622e-06	4.84944e-06	ENSNFUG00015023903
433.56	1.10235	0.174408	6.32051	2.60697e-10	1.39206e-09	ENSNFUG00015002752	nudt19
384.772	1.10204	0.275017	4.00716	6.14529e-05	0.00016008	ENSNFUG00015006102	hcls1
986.26	1.10192	0.117846	9.35053	8.72068e-21	1.21908e-19	ENSNFUG00015008829
180.23	1.10186	0.222293	4.95679	7.1668e-07	2.48896e-06	ENSNFUG00015008210	ADAMTS15
496.322	1.10184	0.207439	5.31165	1.08635e-07	4.20276e-07	ENSNFUG00015021954	PLXND1
63.2529	1.1011	0.256147	4.29869	1.71811e-05	4.87519e-05	ENSNFUG00015006244	ptges
163.363	1.1009	0.414108	2.65848	0.00784936	0.0140242	ENSNFUG00015002853
524.799	1.10085	0.0938807	11.7261	9.3701e-32	2.92819e-30	ENSNFUG00015020551	dhcr7
208.584	1.09975	0.165477	6.64592	3.0133e-11	1.7728e-10	ENSNFUG00015002818	hopx
245.031	1.09958	0.145366	7.56424	3.90152e-14	3.0519e-13	ENSNFUG00015022095	ppp2r3a
693.825	1.09851	0.144846	7.58397	3.35145e-14	2.64245e-13	ENSNFUG00015006211	CARMIL1
175.41	1.09844	0.158436	6.93307	4.11812e-12	2.66948e-11	ENSNFUG00015008792	GNG12
80.7945	1.09842	0.180733	6.07759	1.22001e-09	5.99009e-09	ENSNFUG00015017918
423.799	1.09814	0.179635	6.11319	9.76595e-10	4.85566e-09	ENSNFUG00015014389
154.631	1.0981	0.293553	3.74071	0.000183504	0.000443667	ENSNFUG00015007076
146.821	1.09686	0.150932	7.26726	3.66865e-13	2.59019e-12	ENSNFUG00015021465
85.2815	1.09558	0.33774	3.24386	0.0011792	0.00247586	ENSNFUG00015000763
734.387	1.09488	0.147215	7.43729	1.02775e-13	7.70673e-13	ENSNFUG00015002450	limch1b
486.981	1.09476	0.124065	8.8241	1.10344e-18	1.28591e-17	ENSNFUG00015001857
160.401	1.09362	0.352769	3.10011	0.00193452	0.00388907	ENSNFUG00015015978
289.365	1.09145	0.128639	8.48458	2.16491e-17	2.27781e-16	ENSNFUG00015022051	pts
295.919	1.09138	0.0951703	11.4676	1.91833e-30	5.43593e-29	ENSNFUG00015000590	snx8a
101.01	1.09118	0.282749	3.85918	0.00011377	0.000284562	ENSNFUG00015003416	pir
346.372	1.09027	0.252054	4.32554	1.52161e-05	4.35499e-05	ENSNFUG00015005348	ncf4
349.787	1.0887	0.0955661	11.3921	4.57694e-30	1.25909e-28	ENSNFUG00015012165	zgc:101765
130.704	1.08819	0.219963	4.94715	7.5307e-07	2.6067e-06	ENSNFUG00015006536	acp5a
53.3392	1.0876	0.327752	3.31836	0.000905493	0.00194274	ENSNFUG00015022804	CD93
620.182	1.08717	0.0955285	11.3805	5.227e-30	1.43374e-28	ENSNFUG00015012717	crbn
493.409	1.08682	0.0886691	12.257	1.54085e-34	5.5201e-33	ENSNFUG00015014583	bend3
108.884	1.08667	0.140755	7.7203	1.16055e-14	9.52915e-14	ENSNFUG00015025425	prrg1
81.7883	1.08613	0.184727	5.87966	4.11111e-09	1.89274e-08	ENSNFUG00015019062
60.4156	1.08537	0.192621	5.63475	1.75309e-08	7.47743e-08	ENSNFUG00015016351	ZCCHC24
279.524	1.08519	0.0977904	11.0971	1.29653e-28	3.18536e-27	ENSNFUG00015025156
173.082	1.0849	0.297833	3.64263	0.000269868	0.000634325	ENSNFUG00015006615
660.114	1.08397	0.100792	10.7545	5.64578e-27	1.25016e-25	ENSNFUG00015018086	glo1
184.772	1.0833	0.109124	9.92729	3.16748e-23	5.42618e-22	ENSNFUG00015018261	ZC3H12D
119.618	1.08315	0.321357	3.37054	0.00075022	0.00163341	ENSNFUG00015020011	foxp4
57.76	1.0825	0.165861	6.52657	6.72939e-11	3.82299e-10	ENSNFUG00015014976	SLC35A3
396.303	1.0825	0.140703	7.69345	1.43216e-14	1.16728e-13	ENSNFUG00015017954	fam107b
62.222	1.08225	0.255356	4.2382	2.25322e-05	6.29405e-05	ENSNFUG00015016127	MAP3K12
229.789	1.08212	0.144909	7.46757	8.16888e-14	6.18956e-13	ENSNFUG00015009539	slc7a6
551.553	1.07992	0.217214	4.97167	6.63796e-07	2.31683e-06	ENSNFUG00015021841	TTC28
292.722	1.07944	0.158073	6.82875	8.56571e-12	5.343e-11	ENSNFUG00015005114	adgra2
319.03	1.07881	0.124533	8.66285	4.60109e-18	5.09717e-17	ENSNFUG00015021552
57.0715	1.07797	0.224182	4.80846	1.52097e-06	5.0176e-06	ENSNFUG00015001656	fbxo48
176.869	1.07789	0.171443	6.2872	3.23238e-10	1.7019e-09	ENSNFUG00015012723	Nfu_g_1_019461
57.6986	1.07715	0.426148	2.52763	0.0114834	0.0198144	ENSNFUG00015004132
2306.23	1.07618	0.175846	6.12	9.35771e-10	4.66622e-09	ENSNFUG00015024526
96.1595	1.07617	0.171085	6.29028	3.16895e-10	1.67177e-09	ENSNFUG00015008338	SHF
80.2214	1.0761	0.133109	8.08436	6.24929e-16	5.7277e-15	ENSNFUG00015012169	tmem220
302.894	1.07546	0.223557	4.81067	1.50426e-06	4.96607e-06	ENSNFUG00015021298	kirrel1b
68.3895	1.07519	0.228705	4.7012	2.58643e-06	8.22732e-06	ENSNFUG00015000354	axin1
118.399	1.07359	0.168165	6.38413	1.72377e-10	9.37183e-10	ENSNFUG00015018572	slc35f6
8257.06	1.07291	0.159406	6.73068	1.68873e-11	1.02686e-10	ENSNFUG00015017018	MBTD1
231.104	1.0724	0.175046	6.12638	8.99002e-10	4.4912e-09	ENSNFUG00015015930	zbtb46
508.402	1.0716	0.420496	2.54842	0.0108211	0.0187886	ENSNFUG00015000317	ptpn6
64.3675	1.07149	0.162257	6.60363	4.01213e-11	2.33347e-10	ENSNFUG00015020210	dntt
2065.33	1.07122	0.411055	2.60604	0.00915964	0.0161373	ENSNFUG00015014000	star
838.343	1.07068	0.108652	9.85428	6.56877e-23	1.08867e-21	ENSNFUG00015021216	itpkcb
612.318	1.07043	0.114134	9.37871	6.67863e-21	9.39896e-20	ENSNFUG00015022460	ahcyl1
473.922	1.06849	0.15788	6.76772	1.30829e-11	8.02259e-11	ENSNFUG00015007972	rps6ka1
456.244	1.06847	0.0737363	14.4905	1.39219e-47	9.36946e-46	ENSNFUG00015000635	ITPKB
144.825	1.06824	0.22122	4.82888	1.37307e-06	4.56091e-06	ENSNFUG00015005328	pdgfba
144.034	1.06824	0.135609	7.87736	3.34373e-15	2.89166e-14	ENSNFUG00015013830
142.278	1.06754	0.194495	5.48878	4.04712e-08	1.65288e-07	ENSNFUG00015000370	sh3d21
331.057	1.06699	0.0931455	11.4551	2.21661e-30	6.2436e-29	ENSNFUG00015019336	ctnnal1
100.913	1.06617	0.213963	4.98298	6.26114e-07	2.19466e-06	ENSNFUG00015017073	pdgfaa
141.452	1.06551	0.22618	4.7109	2.46619e-06	7.87811e-06	ENSNFUG00015015922	rorca
102.571	1.06536	0.417287	2.55305	0.0106784	0.0185634	ENSNFUG00015006764	arhgef3
307.413	1.06455	0.429533	2.47839	0.0131976	0.0224941	ENSNFUG00015009103	plvapa
122.912	1.06424	0.232072	4.58581	4.52219e-06	1.39174e-05	ENSNFUG00015021300	daam2
1217.58	1.06307	0.197377	5.38599	7.20472e-08	2.84863e-07	ENSNFUG00015017919	prkg2
6732.39	1.0625	0.116563	9.11525	7.84914e-20	1.01031e-18	ENSNFUG00015014572	tuba8l3
119.127	1.06231	0.188583	5.63312	1.76982e-08	7.54194e-08	ENSNFUG00015010640	sema3c
77.5936	1.06039	0.166962	6.3511	2.13781e-10	1.15067e-09	ENSNFUG00015023056	ccdc28b
126.887	1.0593	0.37923	2.79329	0.00521744	0.00965316	ENSNFUG00015021538
419.893	1.05843	0.0988932	10.7028	9.87492e-27	2.13889e-25	ENSNFUG00015012071
300.241	1.05717	0.0958066	11.0344	2.60762e-28	6.28364e-27	ENSNFUG00015004141	f8
117.524	1.05693	0.194437	5.43587	5.45291e-08	2.18953e-07	ENSNFUG00015024147
252.88	1.05675	0.255319	4.13893	3.48927e-05	9.4757e-05	ENSNFUG00015019897	si:dkey-239i20.4
248.649	1.05666	0.109442	9.65498	4.68235e-22	7.25611e-21	ENSNFUG00015012279
183.283	1.0566	0.285629	3.6992	0.000216284	0.00051715	ENSNFUG00015019302	si:dkey-79d12.5
1291.79	1.05659	0.0860649	12.2767	1.20839e-34	4.34558e-33	ENSNFUG00015020081	MARCHF2
365.909	1.05521	0.20859	5.0588	4.21901e-07	1.51348e-06	ENSNFUG00015001691	FAM160A1
116.174	1.05487	0.418616	2.51989	0.0117392	0.0202095	ENSNFUG00015022002	plekhn1
55.0603	1.05444	0.248642	4.24078	2.22743e-05	6.22572e-05	ENSNFUG00015022926
83.3807	1.05428	0.311099	3.38889	0.000701767	0.00153412	ENSNFUG00015000148
71.7106	1.05395	0.210164	5.01489	5.30651e-07	1.88068e-06	ENSNFUG00015006930	trim55b
330.855	1.05361	0.190483	5.53123	3.17989e-08	1.3135e-07	ENSNFUG00015018493	prnpb
120.848	1.05325	0.173471	6.07163	1.2662e-09	6.19424e-09	ENSNFUG00015001049	smad7
275.452	1.05309	0.250364	4.20625	2.59648e-05	7.19003e-05	ENSNFUG00015013724	kdr
107.177	1.05246	0.175075	6.01145	1.83868e-09	8.83652e-09	ENSNFUG00015019241
547.049	1.05221	0.13423	7.83887	4.54624e-15	3.87644e-14	ENSNFUG00015002844	spra
465.641	1.05188	0.15457	6.8052	1.00908e-11	6.25909e-11	ENSNFUG00015004809	znf217
88.3057	1.05187	0.26222	4.0114	6.036e-05	0.000157364	ENSNFUG00015024317	abch1
1747.95	1.05184	0.126609	8.30779	9.75045e-17	9.65007e-16	ENSNFUG00015020549	socs5b
336.042	1.0515	0.125717	8.36403	6.06094e-17	6.12398e-16	ENSNFUG00015004597	RILPL1
129.385	1.05093	0.130997	8.02255	1.03573e-15	9.28068e-15	ENSNFUG00015011925	PTPRS
244.654	1.05082	0.285772	3.67711	0.000235891	0.00055984	ENSNFUG00015023932	adamts1
100.518	1.05029	0.21069	4.98501	6.19581e-07	2.17338e-06	ENSNFUG00015022777	edil3a
232.524	1.05012	0.142015	7.39444	1.42006e-13	1.04775e-12	ENSNFUG00015011991
76.219	1.04918	0.217693	4.81953	1.43894e-06	4.76543e-06	ENSNFUG00015022852	mycla
121.034	1.04838	0.228577	4.58654	4.50651e-06	1.38805e-05	ENSNFUG00015002181	P2RY4
62.4834	1.04711	0.194651	5.37939	7.47392e-08	2.94888e-07	ENSNFUG00015002634	rnd3a
389.675	1.04561	0.170224	6.14251	8.12265e-10	4.07842e-09	ENSNFUG00015012417
2478.97	1.04505	0.147108	7.10396	1.21236e-12	8.21196e-12	ENSNFUG00015018859	ftr67
253.302	1.04487	0.150773	6.93012	4.20496e-12	2.7211e-11	ENSNFUG00015015392
480.099	1.04439	0.0968005	10.7891	3.87599e-27	8.70551e-26	ENSNFUG00015016726	rhot1b
172.198	1.04364	0.104191	10.0167	1.28765e-23	2.27836e-22	ENSNFUG00015001322	ARHGAP6
223.999	1.04345	0.201426	5.18033	2.21492e-07	8.25189e-07	ENSNFUG00015003045
180.043	1.04321	0.189609	5.50193	3.7565e-08	1.53986e-07	ENSNFUG00015011853
983.296	1.04259	0.219875	4.74172	2.11909e-06	6.85222e-06	ENSNFUG00015020095	plpp2a
101.777	1.04235	0.133605	7.80173	6.10643e-15	5.13474e-14	ENSNFUG00015010187	foxo1a
123.849	1.04147	0.140872	7.39303	1.4352e-13	1.0577e-12	ENSNFUG00015004982	gtf2f2b
181.639	1.04044	0.11396	9.12981	6.86201e-20	8.88102e-19	ENSNFUG00015007426	zmynd8
50.8193	1.04036	0.244904	4.24801	2.15673e-05	6.04065e-05	ENSNFUG00015007971	KIAA1549L
186.695	1.04025	0.0906799	11.4717	1.83094e-30	5.20394e-29	ENSNFUG00015005454	lepr
245.747	1.04002	0.347039	2.99683	0.00272802	0.00533709	ENSNFUG00015002425	slc2a6
372.44	1.03965	0.173019	6.0089	1.86785e-09	8.96756e-09	ENSNFUG00015013571	pald1a
143.662	1.03891	0.143076	7.2612	3.83664e-13	2.7017e-12	ENSNFUG00015000995
277.928	1.03839	0.185638	5.59364	2.2236e-08	9.36136e-08	ENSNFUG00015006330	adamts7
72.8765	1.03734	0.211344	4.90829	9.18753e-07	3.13471e-06	ENSNFUG00015000257	sh3pxd2aa
68.1675	1.0366	0.204074	5.07955	3.78339e-07	1.36527e-06	ENSNFUG00015014292	neto1l
80.2373	1.0366	0.292299	3.54636	0.000390591	0.000893456	ENSNFUG00015019483	tlr18
279.877	1.03584	0.251066	4.12576	3.69506e-05	9.99996e-05	ENSNFUG00015012103	HMOX1
68.7952	1.03446	0.193953	5.33353	9.63194e-08	3.74699e-07	ENSNFUG00015005960
91.8364	1.03418	0.158175	6.5382	6.22625e-11	3.55108e-10	ENSNFUG00015000699
367.753	1.03416	0.243652	4.24442	2.19161e-05	6.13287e-05	ENSNFUG00015000258
125.391	1.0341	0.208958	4.94888	7.46433e-07	2.58515e-06	ENSNFUG00015022066	arid3b
277.704	1.03405	0.157008	6.58598	4.519e-11	2.60975e-10	ENSNFUG00015003221	CYP46A1
4505.34	1.03322	0.0922488	11.2004	4.06083e-29	1.04682e-27	ENSNFUG00015003514	ssrp1a
585.891	1.03309	0.173364	5.9591	2.53626e-09	1.19693e-08	ENSNFUG00015005368	tap1
4881.59	1.03277	0.196049	5.26792	1.37977e-07	5.2675e-07	ENSNFUG00015005914	ctsba
479.532	1.03164	0.149586	6.8966	5.32612e-12	3.41147e-11	ENSNFUG00015010645	ccnd1
55.5528	1.03146	0.311492	3.31133	0.000928523	0.00198898	ENSNFUG00015024324	kazna
103.192	1.03137	0.275555	3.74287	0.000181929	0.000440198	ENSNFUG00015016946
73.2014	1.03015	0.223498	4.60919	4.04237e-06	1.25228e-05	ENSNFUG00015001701	PLIN1
123.597	1.02958	0.157705	6.52853	6.64184e-11	3.77667e-10	ENSNFUG00015015751
221.818	1.02938	0.124774	8.24995	1.58454e-16	1.53202e-15	ENSNFUG00015015094	si:dkey-240h12.4
431.753	1.02936	0.128409	8.01625	1.09021e-15	9.74107e-15	ENSNFUG00015002194	coro1b
90.1858	1.02935	0.387875	2.65382	0.00795856	0.0142018	ENSNFUG00015002721	prss35
73.1335	1.02927	0.259643	3.96418	7.36498e-05	0.000189857	ENSNFUG00015025402	lpar3
213.892	1.02888	0.167288	6.15036	7.73095e-10	3.88693e-09	ENSNFUG00015011817
81.7774	1.0285	0.167158	6.15285	7.61039e-10	3.82836e-09	ENSNFUG00015014328	svopa
161.375	1.02771	0.140448	7.31736	2.52902e-13	1.81481e-12	ENSNFUG00015020183	nudt12
198.46	1.02731	0.312814	3.2841	0.00102309	0.00217249	ENSNFUG00015017826	spi1b
477.825	1.0273	0.116805	8.79496	1.43097e-18	1.64824e-17	ENSNFUG00015008561	lipf
183.656	1.02617	0.118605	8.65198	5.06138e-18	5.58738e-17	ENSNFUG00015019801	tamalin
50.2666	1.02592	0.302573	3.39064	0.000697284	0.0015252	ENSNFUG00015020829	kcnma1b
360.166	1.02558	0.126047	8.13645	4.07051e-16	3.78601e-15	ENSNFUG00015020211
264.068	1.02557	0.179964	5.69875	1.20686e-08	5.25098e-08	ENSNFUG00015002498	spry1
619.171	1.02441	0.375707	2.72663	0.00639854	0.0116463	ENSNFUG00015014457	cyp17a2
151.639	1.02433	0.226282	4.52678	5.98906e-06	1.81502e-05	ENSNFUG00015006497	ogfrl1
79.936	1.02261	0.246725	4.14475	3.40184e-05	9.2556e-05	ENSNFUG00015022440
71.1514	1.02237	0.213039	4.79897	1.59485e-06	5.24765e-06	ENSNFUG00015017856	gabrr2b
53.3502	1.02225	0.306456	3.33571	0.000850815	0.00183483	ENSNFUG00015000393	eva1ba
286.567	1.02085	0.317017	3.22017	0.00128115	0.00267075	ENSNFUG00015006997	si:dkey-76k16.5
148.102	1.0208	0.195401	5.22415	1.74957e-07	6.59379e-07	ENSNFUG00015017362
3450.43	1.02062	0.109086	9.35609	8.27387e-21	1.16093e-19	ENSNFUG00015013339	thap4
1920.04	1.02037	0.0939876	10.8564	1.85864e-27	4.22998e-26	ENSNFUG00015022348	lonp2
166.153	1.01982	0.168525	6.05144	1.43553e-09	6.97372e-09	ENSNFUG00015003941	fgfrl1a
1460.36	1.01869	0.0692687	14.7063	5.86939e-49	4.22148e-47	ENSNFUG00015000797	adss2
125.389	1.01863	0.139964	7.27783	3.3922e-13	2.40582e-12	ENSNFUG00015003245	si:ch211-79k12.2
167.127	1.01689	0.201261	5.05259	4.35869e-07	1.55973e-06	ENSNFUG00015015323	zc3h12ab
177.802	1.01656	0.127207	7.99138	1.33432e-15	1.18772e-14	ENSNFUG00015001376	cited4b
178.443	1.01626	0.17363	5.85303	4.82695e-09	2.20507e-08	ENSNFUG00015007288	Nfu_g_1_016545
75.3254	1.01621	0.244143	4.16236	3.14969e-05	8.61433e-05	ENSNFUG00015000758	NXPE3
1746.01	1.01615	0.349737	2.90547	0.003667	0.0069919	ENSNFUG00015013878	tgm2b
56.7316	1.01609	0.163531	6.21347	5.18258e-10	2.6625e-09	ENSNFUG00015019232	bsk146
585.993	1.01555	0.244308	4.15685	3.22668e-05	8.8185e-05	ENSNFUG00015022121	entpd1
992.277	1.01553	0.107512	9.44575	3.52859e-21	5.07965e-20	ENSNFUG00015022615	Nfu_g_1_023239
137.58	1.01533	0.150752	6.73513	1.63788e-11	9.97227e-11	ENSNFUG00015019615
697.327	1.01446	0.180391	5.62366	1.86956e-08	7.95258e-08	ENSNFUG00015016064	id1
341.107	1.01374	0.211782	4.7867	1.69543e-06	5.55725e-06	ENSNFUG00015002104	CDK5R1
176.796	1.01367	0.280475	3.61413	0.000301356	0.000702642	ENSNFUG00015010066	luzp2
348.272	1.01361	0.121078	8.37154	5.68704e-17	5.76474e-16	ENSNFUG00015015370	si:ch73-89b15.3
89.5987	1.01316	0.28477	3.55781	0.000373958	0.000858222	ENSNFUG00015021213	cmya5
53.5267	1.01277	0.17914	5.65351	1.572e-08	6.75087e-08	ENSNFUG00015010600	amdhd1
165.901	1.01242	0.115005	8.80327	1.32891e-18	1.53632e-17	ENSNFUG00015013204	otud7a
72.307	1.0113	0.155374	6.50884	7.57325e-11	4.27958e-10	ENSNFUG00015016595
98.7475	1.01104	0.204017	4.95567	7.20823e-07	2.50243e-06	ENSNFUG00015016835	rbfox2
276.414	1.01089	0.128456	7.86956	3.55877e-15	3.06777e-14	ENSNFUG00015011475	trpm4b.2
111.673	1.01052	0.243442	4.15096	3.3109e-05	9.02641e-05	ENSNFUG00015003470	IL18R1
111.115	1.01022	0.198795	5.08172	3.74036e-07	1.35052e-06	ENSNFUG00015016255
1055.88	1.00854	0.168756	5.97635	2.28198e-09	1.08562e-08	ENSNFUG00015004528	B2M
271.585	1.00811	0.187001	5.39095	7.00873e-08	2.77521e-07	ENSNFUG00015008170	cnksr1
130.572	1.00802	0.169784	5.9371	2.90114e-09	1.35925e-08	ENSNFUG00015017992	slco4a1
90.1122	1.00763	0.240575	4.18842	2.80909e-05	7.73556e-05	ENSNFUG00015000827	CIITA
305.309	1.00761	0.110011	9.15918	5.22928e-20	6.85261e-19	ENSNFUG00015007217	alg11
265.408	1.00727	0.208087	4.84061	1.29442e-06	4.31487e-06	ENSNFUG00015015966
525.417	1.00718	0.108232	9.30569	1.33121e-20	1.8297e-19	ENSNFUG00015023103
85.8968	1.00649	0.191963	5.24315	1.57857e-07	5.97679e-07	ENSNFUG00015008681
155.999	1.00641	0.122164	8.23822	1.74795e-16	1.68224e-15	ENSNFUG00015012538	atp8b2
89.9081	1.00611	0.272479	3.69245	0.000222104	0.000529655	ENSNFUG00015022133	msi2a
63.925	1.00557	0.195304	5.14874	2.62246e-07	9.69543e-07	ENSNFUG00015006246	spegb
121.957	1.00539	0.223278	4.50287	6.70427e-06	2.02072e-05	ENSNFUG00015018817	syt7b
76.4525	1.00477	0.174488	5.75841	8.49096e-09	3.76125e-08	ENSNFUG00015015461
237.651	1.00408	0.302018	3.32458	0.000885522	0.00190336	ENSNFUG00015002792
161.111	1.00264	0.145056	6.91206	4.77682e-12	3.07531e-11	ENSNFUG00015017628	arhgap29a
322.381	1.002	0.155379	6.44877	1.12761e-10	6.25695e-10	ENSNFUG00015014434
298.149	1.00067	0.107147	9.33918	9.7084e-21	1.35415e-19	ENSNFUG00015004089	lama2
640.459	1.00035	0.13099	7.63682	2.22656e-14	1.78238e-13	ENSNFUG00015020255	lxn
837.587	-1.00136	0.130688	-7.66224	1.82714e-14	1.47139e-13	ENSNFUG00015006117
4352.13	-1.00224	0.06203	-16.1574	1.00728e-58	9.9378e-57	ENSNFUG00015020286	sarnp
56.8243	-1.00284	0.337737	-2.9693	0.00298476	0.00580023	ENSNFUG00015010617
397.827	-1.00403	0.128786	-7.79614	6.38303e-15	5.35299e-14	ENSNFUG00015019869	gins1
2509.59	-1.00414	0.0933543	-10.7562	5.53834e-27	1.22926e-25	ENSNFUG00015009208	mad2l1
717.016	-1.00535	0.103845	-9.68129	3.6213e-22	5.67246e-21	ENSNFUG00015009887
1841.14	-1.00635	0.0644372	-15.6176	5.52538e-55	4.93461e-53	ENSNFUG00015003789	helq
625.794	-1.0074	0.112293	-8.97118	2.93351e-19	3.57585e-18	ENSNFUG00015021303	cep97
383.404	-1.00759	0.124355	-8.10249	5.38473e-16	4.95701e-15	ENSNFUG00015020314	deaf1
1098.09	-1.00866	0.211506	-4.76897	1.85171e-06	6.03486e-06	ENSNFUG00015002872
714.248	-1.0087	0.0827369	-12.1916	3.44481e-34	1.20658e-32	ENSNFUG00015022508	nemp1
124.752	-1.01008	0.139912	-7.21942	5.22086e-13	3.63704e-12	ENSNFUG00015015251	upf3a
276.697	-1.01081	0.146737	-6.88856	5.63592e-12	3.59767e-11	ENSNFUG00015017576	dbn1
1048.78	-1.01201	0.0985482	-10.2692	9.70221e-25	1.82464e-23	ENSNFUG00015015244	yipf3
1047.66	-1.01224	0.0724495	-13.9716	2.32305e-44	1.3511e-42	ENSNFUG00015005092	KIAA0586
881.523	-1.01321	0.146158	-6.93225	4.14208e-12	2.68317e-11	ENSNFUG00015007228	PSMB11
4895.04	-1.01335	0.110315	-9.18593	4.0797e-20	5.38738e-19	ENSNFUG00015003589	numa1
245.169	-1.01424	0.120177	-8.43953	3.18617e-17	3.30618e-16	ENSNFUG00015020249	tp53rk
3128.57	-1.01484	0.342538	-2.9627	0.00304957	0.00591703	ENSNFUG00015006971
101.862	-1.01697	0.157488	-6.45746	1.06477e-10	5.924e-10	ENSNFUG00015016652	mpp3a
459.359	-1.01703	0.136066	-7.47452	7.74874e-14	5.89016e-13	ENSNFUG00015001711	dcp2
677.384	-1.01981	0.0834714	-12.2175	2.50605e-34	8.84344e-33	ENSNFUG00015017621	dctpp1
176.334	-1.01995	0.12827	-7.95163	1.84075e-15	1.61862e-14	ENSNFUG00015008043	ncam1a
200.442	-1.0206	0.144143	-7.08042	1.43717e-12	9.69638e-12	ENSNFUG00015014687	nlgn3b
16473	-1.02362	0.0748813	-13.6699	1.53588e-42	8.22218e-41	ENSNFUG00015011529	hsp90aa1.2
406.132	-1.02572	0.092346	-11.1074	1.15537e-28	2.84598e-27	ENSNFUG00015010467	entpd5b
2271.63	-1.02617	0.10434	-9.8348	7.97242e-23	1.31207e-21	ENSNFUG00015022429	cycsb
275.79	-1.02629	0.088842	-11.5518	7.22701e-31	2.11798e-29	ENSNFUG00015018415	pyroxd2
2887.83	-1.02768	0.0670151	-15.3351	4.45604e-53	3.76545e-51	ENSNFUG00015016396	ube2j2
542.896	-1.02888	0.106418	-9.66823	4.11446e-22	6.41298e-21	ENSNFUG00015017022	nmnat1
749.211	-1.02975	0.429885	-2.39542	0.0166014	0.0277289	ENSNFUG00015016101
120.09	-1.03042	0.19588	-5.26044	1.43713e-07	5.47648e-07	ENSNFUG00015012978	HIST1H2BD
131.237	-1.03118	0.27652	-3.72913	0.000192143	0.000463129	ENSNFUG00015016879	gpc1a
93.0545	-1.03228	0.20635	-5.00256	5.65752e-07	1.99645e-06	ENSNFUG00015004667	5_8S_rRNA
1732.73	-1.03272	0.119089	-8.67181	4.25296e-18	4.73657e-17	ENSNFUG00015011628	banf1
3560.25	-1.03292	0.085958	-12.0166	2.90702e-33	9.73001e-32	ENSNFUG00015018263	asf1bb
1783.87	-1.03382	0.173252	-5.96714	2.41447e-09	1.1426e-08	ENSNFUG00015011930
1215.97	-1.03384	0.11919	-8.67388	4.17642e-18	4.65683e-17	ENSNFUG00015018974	mak
1385.98	-1.03452	0.0694927	-14.8868	4.0167e-50	3.01557e-48	ENSNFUG00015006771	hpf1
122.409	-1.0358	0.141714	-7.30911	2.6891e-13	1.92309e-12	ENSNFUG00015006869	PRDM6
12978.6	-1.03849	0.0654894	-15.8574	1.24973e-56	1.16009e-54	ENSNFUG00015014638	pcna
3158.34	-1.03892	0.169716	-6.12153	9.26801e-10	4.62395e-09	ENSNFUG00015016116	dnah12
2281.05	-1.03955	0.142252	-7.30783	2.71487e-13	1.94079e-12	ENSNFUG00015011055	hsf2bp
801.236	-1.03993	0.0902887	-11.5179	1.07209e-30	3.09853e-29	ENSNFUG00015020835	coro1cb
522.241	-1.04008	0.0917646	-11.3342	8.88243e-30	2.39115e-28	ENSNFUG00015009119	aco2
794.934	-1.04009	0.174222	-5.96994	2.37345e-09	1.12545e-08	ENSNFUG00015010456
1419.38	-1.04016	0.102135	-10.1842	2.3339e-24	4.31599e-23	ENSNFUG00015013919	hyou1
175.652	-1.0403	0.169393	-6.1413	8.18508e-10	4.10758e-09	ENSNFUG00015003539	sagb
248.722	-1.04128	0.148318	-7.0206	2.20917e-12	1.4679e-11	ENSNFUG00015017776
71.3961	-1.04429	0.175566	-5.94812	2.71235e-09	1.27555e-08	ENSNFUG00015020777	arl10
424.976	-1.04446	0.163732	-6.3791	1.78129e-10	9.67616e-10	ENSNFUG00015023385	dars2
172.218	-1.04591	0.142115	-7.35956	1.84517e-13	1.3456e-12	ENSNFUG00015024394	map4l
583.119	-1.04594	0.13194	-7.92739	2.23802e-15	1.9579e-14	ENSNFUG00015013517	lrrc20
700.493	-1.04684	0.0628823	-16.6476	3.15018e-62	3.39211e-60	ENSNFUG00015006638	si:dkey-24l11.2
178.524	-1.04755	0.208773	-5.01766	5.23049e-07	1.85514e-06	ENSNFUG00015009305
1435.68	-1.04764	0.0702709	-14.9085	2.90126e-50	2.19564e-48	ENSNFUG00015001400	cdk9
1669.12	-1.04858	0.109805	-9.54946	1.3037e-21	1.93745e-20	ENSNFUG00015022762	parpbp
219.227	-1.05076	0.295291	-3.55839	0.000373135	0.000856647	ENSNFUG00015010699	padi2
1273.13	-1.05503	0.0740553	-14.2465	4.71093e-46	2.97895e-44	ENSNFUG00015025243	CDCA7L
236.259	-1.05636	0.181077	-5.83376	5.41933e-09	2.46314e-08	ENSNFUG00015017964
3660.04	-1.05792	0.196238	-5.39097	7.00772e-08	2.77521e-07	ENSNFUG00015016626	c4b
3775.53	-1.05825	0.0839061	-12.6123	1.80595e-36	7.01678e-35	ENSNFUG00015013520	uba2
510.908	-1.05839	0.150416	-7.03645	1.97205e-12	1.31498e-11	ENSNFUG00015015071
75.5991	-1.05846	0.23556	-4.49337	7.01054e-06	2.10898e-05	ENSNFUG00015019772	barx1
1791.25	-1.05933	0.0512168	-20.6832	4.91031e-95	1.30324e-92	ENSNFUG00015022178	commd9
108.312	-1.05969	0.269538	-3.9315	8.44192e-05	0.000215409	ENSNFUG00015002060	syt4
352.802	-1.06013	0.135328	-7.83381	4.73286e-15	4.02763e-14	ENSNFUG00015005772	oxnad1
7552.62	-1.0609	0.0932993	-11.3709	5.83589e-30	1.59148e-28	ENSNFUG00015003523	esco2
74.175	-1.0613	0.142958	-7.42385	1.1376e-13	8.48654e-13	ENSNFUG00015018164	si:dkey-121a9.3
2813.91	-1.06239	0.0510289	-20.8194	2.89072e-96	7.89459e-94	ENSNFUG00015025135	rbm4.3
490.972	-1.063	0.101093	-10.515	7.36484e-26	1.50361e-24	ENSNFUG00015015612	CDCA5
17817.3	-1.06379	0.0957538	-11.1096	1.12662e-28	2.7788e-27	ENSNFUG00015008345	top2a
134.44	-1.06418	0.143312	-7.42561	1.12261e-13	8.38132e-13	ENSNFUG00015011735
4806.3	-1.06678	0.0683023	-15.6185	5.4493e-55	4.88984e-53	ENSNFUG00015009619	prdx1
209.633	-1.06793	0.235943	-4.52619	6.00557e-06	1.81944e-05	ENSNFUG00015022970	pdlim2
8666.68	-1.06947	0.0995492	-10.7432	6.38171e-27	1.40487e-25	ENSNFUG00015006814	ddx19a
393.942	-1.07057	0.0782411	-13.683	1.28306e-42	6.92781e-41	ENSNFUG00015014049
7744.46	-1.07128	0.0904665	-11.8418	2.37427e-32	7.62193e-31	ENSNFUG00015011162
1985.19	-1.07139	0.0998109	-10.7342	7.03228e-27	1.54089e-25	ENSNFUG00015018326	smarcad1a
354.649	-1.07242	0.305056	-3.51548	0.000438966	0.000994336	ENSNFUG00015010284
723.47	-1.07284	0.0909181	-11.8001	3.89885e-32	1.23687e-30	ENSNFUG00015022147	dck
269.264	-1.07432	0.113078	-9.5007	2.08494e-21	3.05035e-20	ENSNFUG00015013153
79.2747	-1.07487	0.223392	-4.8116	1.4973e-06	4.94569e-06	ENSNFUG00015021249	fap
1049.02	-1.07585	0.128864	-8.34871	6.90108e-17	6.92829e-16	ENSNFUG00015010021
3560.29	-1.07684	0.0486256	-22.1456	1.1498e-108	4.08807e-106	ENSNFUG00015022398	ltn1
223.022	-1.07814	0.119356	-9.03298	1.67059e-19	2.07792e-18	ENSNFUG00015022006	naaladl1
1188.43	-1.07935	0.0583746	-18.4901	2.48286e-76	4.58696e-74	ENSNFUG00015010190	pex16
130.549	-1.08198	0.186368	-5.80561	6.41331e-09	2.88844e-08	ENSNFUG00015025053	CSRNP3
88.5204	-1.08213	0.207051	-5.22638	1.72857e-07	6.52117e-07	ENSNFUG00015015075	NMT1
142.729	-1.08261	0.292373	-3.70284	0.0002132	0.000510489	ENSNFUG00015023728	ncanb
174	-1.08489	0.150411	-7.21284	5.47953e-13	3.80598e-12	ENSNFUG00015011223	ankrd50l
2609.03	-1.08592	0.0503753	-21.5565	4.59987e-103	1.39806e-100	ENSNFUG00015021556	tars1
107.292	-1.08721	0.17563	-6.19038	6.00203e-10	3.05682e-09	ENSNFUG00015010992	pcdh9
1239.69	-1.0879	0.0710349	-15.315	6.07348e-53	5.08661e-51	ENSNFUG00015020800
1962.33	-1.0882	0.094087	-11.5658	6.13902e-31	1.81323e-29	ENSNFUG00015024897	qars1
1081.11	-1.08863	0.0914671	-11.9019	1.15685e-32	3.79125e-31	ENSNFUG00015006207	tha1
4024.26	-1.08923	0.142624	-7.63708	2.22205e-14	1.77953e-13	ENSNFUG00015024072
51.435	-1.09212	0.210721	-5.18277	2.1862e-07	8.15292e-07	ENSNFUG00015002763
412.694	-1.09226	0.132311	-8.25521	1.51639e-16	1.46839e-15	ENSNFUG00015023616
2401	-1.09307	0.0885779	-12.3402	5.5017e-35	2.01309e-33	ENSNFUG00015005550	smg6
1341.91	-1.09466	0.0927293	-11.8049	3.68174e-32	1.16996e-30	ENSNFUG00015004530	WBP4
254.726	-1.09529	0.0846145	-12.9444	2.52577e-38	1.09921e-36	ENSNFUG00015017575	RASAL1
1008.77	-1.09572	0.085821	-12.7675	2.48922e-37	1.01971e-35	ENSNFUG00015021764	zgc:63863
161.411	-1.09595	0.223775	-4.89755	9.70371e-07	3.30066e-06	ENSNFUG00015016084	ano1a
53.184	-1.09672	0.2416	-4.5394	5.6415e-06	1.71465e-05	ENSNFUG00015024292	ush1c
135.172	-1.09812	0.224018	-4.90195	9.48882e-07	3.23048e-06	ENSNFUG00015006428	CDR2
750.109	-1.09959	0.111856	-9.83044	8.32526e-23	1.36656e-21	ENSNFUG00015001180	chrnb1l
1076.83	-1.10024	0.0962515	-11.4309	2.9293e-30	8.17773e-29	ENSNFUG00015003061	SRF
3029.65	-1.10035	0.0542765	-20.2731	2.22058e-91	5.43436e-89	ENSNFUG00015017613	cacybp
1850.68	-1.10111	0.11393	-9.66476	4.25631e-22	6.62858e-21	ENSNFUG00015022662	gins4
764.509	-1.10239	0.135989	-8.10641	5.21366e-16	4.80656e-15	ENSNFUG00015008226	SLC25A29
111.352	-1.10604	0.182456	-6.06197	1.34465e-09	6.55593e-09	ENSNFUG00015014100	pdlim5a
14015.4	-1.10616	0.0937934	-11.7935	4.21404e-32	1.33461e-30	ENSNFUG00015015030	Nfu_g_1_007837
490.626	-1.10618	0.0764519	-14.4689	1.90368e-47	1.26313e-45	ENSNFUG00015006854	pink1
906.049	-1.10629	0.394434	-2.80476	0.00503539	0.00934479	ENSNFUG00015002368
732.798	-1.10798	0.281513	-3.9358	8.29184e-05	0.00021178	ENSNFUG00015020586
853.249	-1.10947	0.185703	-5.97445	2.30867e-09	1.09694e-08	ENSNFUG00015005027	OLA.3124
524.973	-1.11089	0.0984891	-11.2793	1.66067e-29	4.40135e-28	ENSNFUG00015008495
264.506	-1.11187	0.130402	-8.52646	1.50897e-17	1.60741e-16	ENSNFUG00015003308	selenoi
172.23	-1.11197	0.135148	-8.22782	1.90653e-16	1.82833e-15	ENSNFUG00015004545	cutc
3086.6	-1.11235	0.0638299	-17.4269	5.16098e-68	6.89741e-66	ENSNFUG00015022052	rpgrip1l
339.571	-1.11675	0.11706	-9.53999	1.42852e-21	2.12127e-20	ENSNFUG00015006746	znf668
298.15	-1.11783	0.0840489	-13.2998	2.32158e-40	1.13043e-38	ENSNFUG00015010765	gss
473.527	-1.11832	0.113314	-9.86922	5.66003e-23	9.45545e-22	ENSNFUG00015021896	mrps25
1016.87	-1.11934	0.199491	-5.611	2.01156e-08	8.51625e-08	ENSNFUG00015009027
102.519	-1.12044	0.287518	-3.89694	9.7414e-05	0.000246332	ENSNFUG00015004952	syngr1a
181.797	-1.12131	0.334727	-3.34994	0.000808296	0.00174934	ENSNFUG00015013183	socs2
468.638	-1.12375	0.0790306	-14.2191	6.9709e-46	4.3933e-44	ENSNFUG00015024669	rab9a
117.093	-1.12742	0.21871	-5.15487	2.5381e-07	9.40016e-07	ENSNFUG00015009616	sat2b
100.374	-1.12853	0.182882	-6.1708	6.79461e-10	3.44002e-09	ENSNFUG00015003927	ABHD1
169.286	-1.12905	0.127305	-8.86887	7.38913e-19	8.7353e-18	ENSNFUG00015024859	gna15.3
2570.65	-1.12947	0.0448726	-25.1705	8.42077e-140	5.66718e-137	ENSNFUG00015001330	cpsf2
475.003	-1.12971	0.071975	-15.6958	1.61548e-55	1.46356e-53	ENSNFUG00015015827	ndufaf8
2596.09	-1.13043	0.0727288	-15.543	1.77354e-54	1.54012e-52	ENSNFUG00015020508	ccnh
2896.66	-1.1307	0.082855	-13.6467	2.11184e-42	1.12417e-40	ENSNFUG00015022937	ift81
589.538	-1.13167	0.145136	-7.79729	6.32511e-15	5.30915e-14	ENSNFUG00015009676	tap2t
205.214	-1.13361	0.111623	-10.1557	3.12523e-24	5.71765e-23	ENSNFUG00015003675	nfil3
1101.61	-1.13429	0.0795058	-14.2668	3.52561e-46	2.24448e-44	ENSNFUG00015015360	gmcl1
730.636	-1.13434	0.123005	-9.22197	2.91687e-20	3.9038e-19	ENSNFUG00015004695	mrps18a
86.4336	-1.13454	0.232807	-4.8733	1.09748e-06	3.69766e-06	ENSNFUG00015019797
70.1779	-1.13508	0.213927	-5.30593	1.12101e-07	4.33052e-07	ENSNFUG00015017734	lrrc73
198.144	-1.13595	0.212644	-5.34206	9.18962e-08	3.58528e-07	ENSNFUG00015013798	pgp
61.124	-1.13706	0.312095	-3.64332	0.000269142	0.000632856	ENSNFUG00015023893
195.894	-1.13888	0.227782	-4.99987	5.73688e-07	2.02407e-06	ENSNFUG00015019814	nr4a1
166.414	-1.13936	0.216056	-5.27347	1.33867e-07	5.12409e-07	ENSNFUG00015005218	ednrba
143.696	-1.14167	0.237397	-4.80913	1.51592e-06	5.00281e-06	ENSNFUG00015012388	ace
120.615	-1.14416	0.190867	-5.99455	2.04056e-09	9.75698e-09	ENSNFUG00015018354
568.316	-1.14449	0.146441	-7.81541	5.47854e-15	4.63033e-14	ENSNFUG00015018092
402.823	-1.14702	0.103804	-11.0499	2.19492e-28	5.33691e-27	ENSNFUG00015016075
345.746	-1.14959	0.108361	-10.609	2.70752e-26	5.6879e-25	ENSNFUG00015010745	golt1ba
533.655	-1.15052	0.0746319	-15.4159	1.28055e-53	1.08696e-51	ENSNFUG00015012151
1372.95	-1.15476	0.126767	-9.10934	8.28869e-20	1.0647e-18	ENSNFUG00015014159
6601.31	-1.15651	0.116354	-9.9396	2.79949e-23	4.80452e-22	ENSNFUG00015010472	cdca8
298.079	-1.16133	0.103643	-11.2051	3.85105e-29	9.95462e-28	ENSNFUG00015011915	cskmt
1211.06	-1.16264	0.323358	-3.59551	0.000323757	0.000749954	ENSNFUG00015002946	sec24b
80.7701	-1.16344	0.397259	-2.92866	0.00340424	0.00653587	ENSNFUG00015016967
7044.9	-1.16409	0.10445	-11.1449	7.57992e-29	1.90957e-27	ENSNFUG00015009830
165.954	-1.16629	0.515305	-2.26331	0.0236168	0.0382136	ENSNFUG00015023113	ank1a
2501.38	-1.16638	0.0869285	-13.4177	4.76168e-41	2.38008e-39	ENSNFUG00015003744	RRM2
136.59	-1.16695	0.128427	-9.08646	1.02314e-19	1.30095e-18	ENSNFUG00015013386	ormdl3
1846.27	-1.17426	0.0696098	-16.8691	7.59005e-64	8.72115e-62	ENSNFUG00015006989
3104.8	-1.17652	0.105105	-11.1938	4.37518e-29	1.12477e-27	ENSNFUG00015022396	sypl2b
5069.79	-1.17709	0.0781422	-15.0635	2.81632e-51	2.21128e-49	ENSNFUG00015016141	nutf2
71.7103	-1.17781	0.317748	-3.70673	0.000209954	0.000503355	ENSNFUG00015016660	evla
623.703	-1.17949	0.1014	-11.6321	2.83198e-31	8.57971e-30	ENSNFUG00015013999	slc7a5
2337.68	-1.18082	0.0822899	-14.3495	1.07243e-46	6.89721e-45	ENSNFUG00015014646
1087.01	-1.18097	0.108412	-10.8934	1.23928e-27	2.87319e-26	ENSNFUG00015018229	Nfu_g_1_011169
2378.53	-1.18136	0.10372	-11.3899	4.69461e-30	1.28958e-28	ENSNFUG00015002746	ech1
2755.45	-1.18269	0.0588951	-20.0813	1.07561e-89	2.44203e-87	ENSNFUG00015000587	trap1
12575.2	-1.18373	0.106435	-11.1216	9.85215e-29	2.44926e-27	ENSNFUG00015009793
150.928	-1.18466	0.113592	-10.4291	1.82633e-25	3.60747e-24	ENSNFUG00015006597	ABLIM1
82.6504	-1.18677	0.185526	-6.39681	1.58658e-10	8.65342e-10	ENSNFUG00015000704
1697.05	-1.18697	0.0747383	-15.8817	8.48485e-57	7.99442e-55	ENSNFUG00015004574	nanog
128.637	-1.19063	0.143617	-8.29028	1.12986e-16	1.10949e-15	ENSNFUG00015017709	myripb
50.9268	-1.19406	0.418859	-2.85074	0.00436179	0.00818661	ENSNFUG00015023975	ano3
123.792	-1.19431	0.16058	-7.4375	1.02605e-13	7.69701e-13	ENSNFUG00015002638	ccdc43
554.426	-1.19523	0.101488	-11.777	5.12616e-32	1.62076e-30	ENSNFUG00015014058	usp42
742.857	-1.19743	0.196525	-6.09302	1.10798e-09	5.46566e-09	ENSNFUG00015016326	crot
75.1731	-1.19966	0.201589	-5.95101	2.66491e-09	1.25544e-08	ENSNFUG00015013122	LHFPL2
52.317	-1.20035	0.222114	-5.40422	6.50922e-08	2.58994e-07	ENSNFUG00015019446
5991.23	-1.20067	0.0940441	-12.7671	2.50307e-37	1.02316e-35	ENSNFUG00015024181	PL10
226.581	-1.20073	0.114663	-10.4718	1.16408e-25	2.33858e-24	ENSNFUG00015015703
1251.42	-1.20206	0.0544861	-22.0619	7.34992e-108	2.42986e-105	ENSNFUG00015025087	TOR1AIP2
778.044	-1.20433	0.104724	-11.5001	1.31748e-30	3.77879e-29	ENSNFUG00015019630
966.923	-1.2051	0.0666661	-18.0766	4.86982e-73	7.77686e-71	ENSNFUG00015019658	sapcd2
3431.28	-1.21026	0.0834759	-14.4983	1.24238e-47	8.45176e-46	ENSNFUG00015019692	iqgap3
1036.93	-1.21054	0.123907	-9.76977	1.51791e-22	2.45946e-21	ENSNFUG00015008272	zwilch
1280.95	-1.21268	0.132897	-9.12501	7.17292e-20	9.25798e-19	ENSNFUG00015010512	sumo2
50.601	-1.21455	0.533594	-2.27617	0.0228358	0.0370644	ENSNFUG00015006673	galnt16
487.768	-1.21705	0.125452	-9.70133	2.97585e-22	4.70049e-21	ENSNFUG00015009845
2765.58	-1.21851	0.0550699	-22.1266	1.75292e-108	6.11703e-106	ENSNFUG00015014927	slbp
271.539	-1.21883	0.132432	-9.20339	3.4682e-20	4.61219e-19	ENSNFUG00015024735	slc41a3
333.024	-1.22631	0.123848	-9.90177	4.08967e-23	6.92415e-22	ENSNFUG00015016242	creg1
2767.28	-1.22637	0.0582659	-21.0479	2.39085e-98	6.72435e-96	ENSNFUG00015010253	cfap20
72.5797	-1.22721	0.321445	-3.81778	0.000134659	0.000332797	ENSNFUG00015018313	5_8S_rRNA
775.291	-1.22792	0.141505	-8.67761	4.04166e-18	4.50924e-17	ENSNFUG00015004499	CSMD1
153.035	-1.22902	0.110534	-11.1189	1.0151e-28	2.51692e-27	ENSNFUG00015015374	TBCEL
177.912	-1.23079	0.337795	-3.6436	0.000268854	0.000632336	ENSNFUG00015012955	rdh10a
925.181	-1.23262	0.0964045	-12.7859	1.96654e-37	8.12664e-36	ENSNFUG00015022020	KLHDC10
1103.89	-1.23326	0.0699398	-17.6332	1.36966e-69	1.98537e-67	ENSNFUG00015016758	cdc45
339.948	-1.23408	0.0732437	-16.849	1.06759e-63	1.2119e-61	ENSNFUG00015021217	actmap
160.043	-1.23472	0.238351	-5.18024	2.21595e-07	8.25407e-07	ENSNFUG00015012749	cd248a
90.6228	-1.23578	0.141077	-8.75957	1.96001e-18	2.23457e-17	ENSNFUG00015019852	pnp4b
71.9833	-1.23696	0.313433	-3.94649	7.93058e-05	0.000203159	ENSNFUG00015022270
50.521	-1.23822	0.221242	-5.5967	2.1847e-08	9.20996e-08	ENSNFUG00015016503	acad11
343.481	-1.23834	0.154623	-8.00878	1.15848e-15	1.03462e-14	ENSNFUG00015009527	slc25a38b
68.8094	-1.23899	0.201841	-6.13844	8.33374e-10	4.18107e-09	ENSNFUG00015004500
252.529	-1.24397	0.0947332	-13.1313	2.17823e-39	1.00114e-37	ENSNFUG00015010428	armc7
7102.33	-1.2455	0.104124	-11.9617	5.63787e-33	1.87042e-31	ENSNFUG00015014069	aspm
268.051	-1.24978	0.168096	-7.43492	1.04633e-13	7.84288e-13	ENSNFUG00015003596
182.181	-1.25211	0.513891	-2.43654	0.0148285	0.0250003	ENSNFUG00015004637
259.809	-1.25304	0.113461	-11.0438	2.3477e-28	5.67909e-27	ENSNFUG00015015923	cax2
12729.1	-1.25391	0.13044	-9.61297	7.04869e-22	1.07813e-20	ENSNFUG00015004704	rsph9
57.9691	-1.25535	0.174999	-7.17348	7.31167e-13	5.03035e-12	ENSNFUG00015002642	ccdc43
121.543	-1.26036	0.397329	-3.17209	0.00151346	0.00311349	ENSNFUG00015016307	ITGA3A
52.2738	-1.26053	0.224108	-5.62464	1.85899e-08	7.91119e-08	ENSNFUG00015009720	si:dkeyp-59c12.1
2820.77	-1.2615	0.310808	-4.05878	4.93298e-05	0.000130613	ENSNFUG00015024212	col1a2
238.256	-1.26353	0.115671	-10.9235	8.90181e-28	2.08639e-26	ENSNFUG00015022313	adat1
164.917	-1.26432	0.112869	-11.2016	4.00328e-29	1.0334e-27	ENSNFUG00015021856	mix23
97.6622	-1.26698	0.195859	-6.46881	9.87778e-11	5.51027e-10	ENSNFUG00015019710
485.589	-1.26818	0.0935591	-13.5549	7.4106e-42	3.86829e-40	ENSNFUG00015005426	fbxo5
62.9671	-1.26867	0.261982	-4.84257	1.28168e-06	4.2762e-06	ENSNFUG00015006524	ptger1a
73.8079	-1.2717	0.166474	-7.63899	2.18929e-14	1.75532e-13	ENSNFUG00015001144	msgn1
290.518	-1.27178	0.128724	-9.87987	5.08985e-23	8.52932e-22	ENSNFUG00015014474
894.655	-1.27567	0.146618	-8.70062	3.30088e-18	3.71133e-17	ENSNFUG00015024223	pcsk5b
234.801	-1.27994	0.0841465	-15.2108	2.99901e-52	2.4571e-50	ENSNFUG00015017357	cracd
193.912	-1.28237	0.120125	-10.6752	1.32903e-26	2.85893e-25	ENSNFUG00015013043	crtac1a
672.588	-1.2874	0.0831471	-15.4834	4.48863e-54	3.84472e-52	ENSNFUG00015005127	EPS15L1
919.62	-1.29676	0.144945	-8.9466	3.66603e-19	4.41705e-18	ENSNFUG00015003691
2421.53	-1.2991	0.0663364	-19.5835	2.13848e-85	4.6319e-83	ENSNFUG00015004706
86.6889	-1.30096	0.125279	-10.3845	2.91713e-25	5.70825e-24	ENSNFUG00015003495	scara5
126.485	-1.30132	0.186281	-6.98581	2.83211e-12	1.86211e-11	ENSNFUG00015012434	PDE1C
255.251	-1.30341	0.512982	-2.54086	0.0110581	0.0191555	ENSNFUG00015025223	sorbs1
2232.5	-1.30656	0.122684	-10.6498	1.7478e-26	3.72575e-25	ENSNFUG00015016423	ift70
327.335	-1.30712	0.113792	-11.4869	1.53548e-30	4.3774e-29	ENSNFUG00015008201	ovca2
60.8269	-1.30716	0.311377	-4.19801	2.69275e-05	7.43692e-05	ENSNFUG00015000897	zc3h12aa
463.688	-1.30866	0.538869	-2.42852	0.0151606	0.025519	ENSNFUG00015001398	slc4a1a
792.12	-1.30884	0.133304	-9.81845	9.37722e-23	1.53656e-21	ENSNFUG00015013627	GOLPH3
192.224	-1.31058	0.240879	-5.44084	5.30291e-08	2.13293e-07	ENSNFUG00015012986
4975.28	-1.31074	0.0569938	-22.9979	4.88827e-117	2.09351e-114	ENSNFUG00015024519	hspa4a
867.426	-1.31075	0.0491646	-26.6604	1.3567e-156	1.11155e-153	ENSNFUG00015003162	mis12
235.511	-1.31154	0.198211	-6.61688	3.66848e-11	2.14286e-10	ENSNFUG00015023092
64.9977	-1.31196	0.205281	-6.39101	1.64794e-10	8.97509e-10	ENSNFUG00015024416	eya4
84.6611	-1.31288	0.196907	-6.66751	2.60178e-11	1.54273e-10	ENSNFUG00015021938	card14
2187.36	-1.31432	0.132847	-9.89345	4.44427e-23	7.50428e-22	ENSNFUG00015016696	si:dkey-28b4.8
144.23	-1.31477	0.333286	-3.94488	7.98411e-05	0.000204364	ENSNFUG00015024268	SUSD3
607.365	-1.31856	0.0797779	-16.5279	2.31204e-61	2.44764e-59	ENSNFUG00015007113
5881.3	-1.31943	0.0958665	-13.7632	4.24069e-43	2.32301e-41	ENSNFUG00015011108	dnaja
251.707	-1.3198	0.10141	-13.0145	1.01173e-38	4.49646e-37	ENSNFUG00015001808
789.514	-1.3208	0.159782	-8.26623	1.38264e-16	1.34579e-15	ENSNFUG00015018072	mcm9
71.7911	-1.32207	0.164902	-8.01727	1.08121e-15	9.67438e-15	ENSNFUG00015020214	etnk2
72.3793	-1.3236	0.150075	-8.81957	1.14896e-18	1.33649e-17	ENSNFUG00015000792	cacna1ib
890.438	-1.32871	0.235054	-5.65277	1.57879e-08	6.77383e-08	ENSNFUG00015025377	RPF1
163.526	-1.33103	0.245874	-5.41343	6.1827e-08	2.46575e-07	ENSNFUG00015016380
64.6451	-1.33311	0.167061	-7.97977	1.46612e-15	1.29767e-14	ENSNFUG00015010281
138.688	-1.33414	0.181528	-7.34946	1.99008e-13	1.44512e-12	ENSNFUG00015025279	col24a1
162.114	-1.33629	0.283787	-4.70878	2.49205e-06	7.95128e-06	ENSNFUG00015021536
475.566	-1.3418	0.0951105	-14.1078	3.39817e-45	2.08583e-43	ENSNFUG00015021806	psph
76.2829	-1.34209	0.177187	-7.57444	3.60693e-14	2.8344e-13	ENSNFUG00015006806
641.096	-1.34521	0.0865368	-15.545	1.72126e-54	1.50164e-52	ENSNFUG00015019767	dnajb1a
76.1158	-1.35199	0.259727	-5.2054	1.93576e-07	7.26354e-07	ENSNFUG00015005141	ankrd33bb
66.9585	-1.35469	0.180772	-7.49391	6.68526e-14	5.10442e-13	ENSNFUG00015022040
76.6097	-1.35979	0.425918	-3.19262	0.00140989	0.00291481	ENSNFUG00015013998	nt5c2l1
428.129	-1.36007	0.141441	-9.6158	6.85768e-22	1.05062e-20	ENSNFUG00015007884	C1orf146
1728.82	-1.3618	0.0632184	-21.5412	6.40104e-103	1.91462e-100	ENSNFUG00015003093	tmem209
82.8556	-1.3703	0.140322	-9.76537	1.58527e-22	2.56419e-21	ENSNFUG00015018124	nopchap1
4529.5	-1.37211	0.0580538	-23.6351	1.68164e-123	8.80243e-121	ENSNFUG00015009197	setdb1b
309.294	-1.37462	0.0924324	-14.8717	5.03536e-50	3.76533e-48	ENSNFUG00015007536	BPHL
90.1694	-1.37465	0.11286	-12.1801	3.96583e-34	1.38137e-32	ENSNFUG00015014245
365.333	-1.37642	0.143211	-9.61115	7.17419e-22	1.09644e-20	ENSNFUG00015023421
54.6078	-1.37885	0.381645	-3.61292	0.000302767	0.000705494	ENSNFUG00015000234	c1r
107.189	-1.38234	0.21562	-6.41102	1.44549e-10	7.90908e-10	ENSNFUG00015018861	si:ch73-52e5.2
56.5982	-1.38249	0.2919	-4.73618	2.17788e-06	7.02988e-06	ENSNFUG00015020879
400.236	-1.38556	0.149763	-9.25166	2.21025e-20	2.98994e-19	ENSNFUG00015006073	si:dkey-184a18.5
439.422	-1.38718	0.0828375	-16.7458	6.07451e-63	6.65512e-61	ENSNFUG00015008361	slc35a5
723.376	-1.38893	0.0909387	-15.2733	1.15249e-52	9.56719e-51	ENSNFUG00015021932	klf8
263.452	-1.39114	0.208113	-6.68456	2.31618e-11	1.38647e-10	ENSNFUG00015022806	hephl1b
775.214	-1.39116	0.0941758	-14.7719	2.22293e-49	1.62992e-47	ENSNFUG00015007024	ccsapb
164.368	-1.39148	0.0995782	-13.9737	2.25614e-44	1.32033e-42	ENSNFUG00015006276	tpk2
50.7058	-1.39613	0.306789	-4.5508	5.3443e-06	1.62747e-05	ENSNFUG00015011741	OLA.1488
293.285	-1.4029	0.235156	-5.96582	2.43411e-09	1.15102e-08	ENSNFUG00015004591	lhfpl2a
1158.05	-1.40333	0.0817287	-17.1706	4.40741e-66	5.6117e-64	ENSNFUG00015007402	cobll1a
874.108	-1.40372	0.117442	-11.9525	6.30135e-33	2.0832e-31	ENSNFUG00015021101	ciao1
374.833	-1.40432	0.365419	-3.84303	0.000121523	0.000302587	ENSNFUG00015017198	CCL-C5A
1582.16	-1.40753	0.109148	-12.8957	4.76086e-38	2.03432e-36	ENSNFUG00015024148	oat
2743.8	-1.41779	0.0779197	-18.1955	5.59965e-74	9.33804e-72	ENSNFUG00015002985	KIAA1009
2277.09	-1.41815	0.111475	-12.7217	4.48162e-37	1.81616e-35	ENSNFUG00015003543	tmem214
1259.43	-1.42014	0.127815	-11.1108	1.11103e-28	2.74754e-27	ENSNFUG00015010606	them4
1155.72	-1.424	0.624178	-2.2814	0.0225245	0.0366097	ENSNFUG00015018491
471.957	-1.42575	0.0817407	-17.4424	3.93215e-68	5.29267e-66	ENSNFUG00015012265	pld6
236.707	-1.42715	0.0850147	-16.7871	3.03219e-63	3.38099e-61	ENSNFUG00015022220	acyp1
1490.41	-1.43073	0.127758	-11.1988	4.1339e-29	1.0642e-27	ENSNFUG00015001951	gys1
212.388	-1.43616	0.171437	-8.37722	5.41906e-17	5.51386e-16	ENSNFUG00015010925	cldnj
223.4	-1.43791	0.0951345	-15.1145	1.29994e-51	1.02924e-49	ENSNFUG00015021670	ADK
389.068	-1.43795	0.133631	-10.7606	5.28466e-27	1.17712e-25	ENSNFUG00015017023	ptprfa
484.559	-1.43935	0.147807	-9.738	2.07605e-22	3.32662e-21	ENSNFUG00015010921	ten1
207.304	-1.44511	0.0913965	-15.8114	2.59562e-56	2.38594e-54	ENSNFUG00015018627	IMPACT
1760.3	-1.44881	0.142915	-10.1376	3.76393e-24	6.87282e-23	ENSNFUG00015006440	cenpv
124.168	-1.45063	0.220145	-6.58941	4.41575e-11	2.55403e-10	ENSNFUG00015013726
207.718	-1.45323	0.136799	-10.6231	2.32818e-26	4.91842e-25	ENSNFUG00015014858	slc5a10
2679.58	-1.46361	0.079668	-18.3714	2.22703e-75	3.95908e-73	ENSNFUG00015012052	prep
172.975	-1.46961	0.140238	-10.4794	1.07432e-25	2.16287e-24	ENSNFUG00015022857	tmem170b
361.745	-1.47238	0.120133	-12.2562	1.55554e-34	5.56218e-33	ENSNFUG00015009300	cdr2l
85.0503	-1.48324	0.248518	-5.96835	2.3967e-09	1.13533e-08	ENSNFUG00015000907
52.7832	-1.48326	0.43966	-3.37366	0.00074176	0.00161648	ENSNFUG00015024353	SPRED2A
511.4	-1.48459	0.0777685	-19.0899	3.064e-81	6.27587e-79	ENSNFUG00015021658	timm10b
1055.73	-1.48592	0.118057	-12.5865	2.50608e-36	9.69702e-35	ENSNFUG00015000404	slc35b2
448.686	-1.48857	0.490052	-3.03759	0.00238481	0.00471408	ENSNFUG00015013077	U1
54.4619	-1.48863	0.495863	-3.0021	0.00268125	0.00525158	ENSNFUG00015009889	wipi1
188.41	-1.49071	0.157219	-9.48176	2.50031e-21	3.64957e-20	ENSNFUG00015022021	nox5
55.227	-1.49338	0.471186	-3.16941	0.00152747	0.00314061	ENSNFUG00015002361	si:ch211-113a14.27
206.677	-1.49382	0.205507	-7.26896	3.62256e-13	2.55956e-12	ENSNFUG00015002371
407.881	-1.49804	0.0729453	-20.5366	1.01502e-93	2.58473e-91	ENSNFUG00015010615	casp7
322.035	-1.49886	0.125548	-11.9385	7.452e-33	2.45499e-31	ENSNFUG00015010229
367.161	-1.50179	0.116709	-12.8678	6.83114e-38	2.87335e-36	ENSNFUG00015020781	dpm3
144.972	-1.50324	0.27613	-5.44397	5.21053e-08	2.09757e-07	ENSNFUG00015016181	eml1
889.409	-1.50707	0.0654562	-23.0241	2.67431e-117	1.17197e-114	ENSNFUG00015002957	ankrd13d
2067.2	-1.51193	0.202323	-7.47286	7.84708e-14	5.95771e-13	ENSNFUG00015017208
181.777	-1.51682	0.200379	-7.56978	3.73852e-14	2.93414e-13	ENSNFUG00015016537	MFSD4A
108.869	-1.52242	0.181822	-8.37311	5.61178e-17	5.69458e-16	ENSNFUG00015017939
87.5156	-1.52623	0.278543	-5.47932	4.26962e-08	1.73773e-07	ENSNFUG00015016854	si:ch211-76l23.7
90.4999	-1.52628	0.187981	-8.1193	4.68884e-16	4.33545e-15	ENSNFUG00015009295
132.849	-1.53239	0.217112	-7.05806	1.68839e-12	1.13184e-11	ENSNFUG00015009644	sgsm1b
486.825	-1.53241	0.0672749	-22.7783	7.51959e-115	2.89182e-112	ENSNFUG00015001826	znf384b
56.0171	-1.5337	0.295479	-5.19055	2.09676e-07	7.83801e-07	ENSNFUG00015012268	viml
90.5167	-1.54188	0.282801	-5.45217	4.97599e-08	2.0083e-07	ENSNFUG00015022814
2196.42	-1.55057	0.0741397	-20.9142	3.9744e-97	1.10138e-94	ENSNFUG00015023731	emc1
115.956	-1.55509	0.151994	-10.2312	1.43681e-24	2.68073e-23	ENSNFUG00015005484
115.119	-1.55601	0.162227	-9.59155	8.67682e-22	1.3112e-20	ENSNFUG00015022293	si:dkey-266f7.9
395.611	-1.56234	0.0923795	-16.9122	3.6601e-64	4.31068e-62	ENSNFUG00015004703	atpsckmt
556.866	-1.56383	0.335885	-4.65584	3.22665e-06	1.0122e-05	ENSNFUG00015022439	snapin
312.704	-1.57915	0.271407	-5.81838	5.94198e-09	2.69031e-08	ENSNFUG00015011234
117.488	-1.5816	0.184675	-8.56425	1.08783e-17	1.17271e-16	ENSNFUG00015023397
474.602	-1.58196	0.0936162	-16.8984	4.62304e-64	5.37756e-62	ENSNFUG00015002874	ELOF1
295.595	-1.58415	0.214923	-7.37075	1.69673e-13	1.24265e-12	ENSNFUG00015014189	jak3
314.757	-1.58605	0.215338	-7.36542	1.76594e-13	1.29232e-12	ENSNFUG00015008477
132.029	-1.59198	0.20359	-7.81954	5.30159e-15	4.49003e-14	ENSNFUG00015023370
118.97	-1.59228	0.189774	-8.39039	4.84521e-17	4.95405e-16	ENSNFUG00015022651	Nfu_g_1_008066
55.9204	-1.60612	0.176796	-9.08459	1.04087e-19	1.32171e-18	ENSNFUG00015024677
59.5152	-1.60621	0.255014	-6.29852	3.00497e-10	1.59061e-09	ENSNFUG00015013874
64.3241	-1.62201	0.279081	-5.81195	6.17487e-09	2.79039e-08	ENSNFUG00015004475	asb15b
103.305	-1.62813	0.132855	-12.2549	1.58164e-34	5.64477e-33	ENSNFUG00015004565	HIP1R
172.871	-1.63835	0.199478	-8.21318	2.15409e-16	2.05528e-15	ENSNFUG00015014623	cyth4a
73.2108	-1.63904	0.225774	-7.25966	3.8806e-13	2.7296e-12	ENSNFUG00015010310	BSN
3064.32	-1.65836	0.200351	-8.27726	1.26044e-16	1.23129e-15	ENSNFUG00015002087	stag3
62.4639	-1.66102	0.173071	-9.59737	8.20078e-22	1.24525e-20	ENSNFUG00015013932	hapln3
1679.27	-1.66116	0.114528	-14.5044	1.13631e-47	7.75819e-46	ENSNFUG00015009270
61.0618	-1.66141	0.237595	-6.99262	2.69801e-12	1.77891e-11	ENSNFUG00015002909	sybu
358.996	-1.66217	0.144098	-11.535	8.7855e-31	2.55484e-29	ENSNFUG00015005251	chchd4a
426.049	-1.66279	0.20661	-8.04797	8.41775e-16	7.60787e-15	ENSNFUG00015002082
137.158	-1.66377	0.144132	-11.5434	7.97403e-31	2.32245e-29	ENSNFUG00015013018
619.635	-1.67056	0.0874546	-19.102	2.429e-81	5.0299e-79	ENSNFUG00015000352	slc38a4
159.583	-1.67186	0.394491	-4.23803	2.25492e-05	6.29787e-05	ENSNFUG00015004958	slc22a2
809.836	-1.67438	0.0890943	-18.7933	8.56399e-79	1.66371e-76	ENSNFUG00015018710	RANGAP1
56.8454	-1.67758	0.633463	-2.64827	0.00809058	0.014417	ENSNFUG00015011768
830.907	-1.6803	0.0974162	-17.2487	1.14476e-66	1.47752e-64	ENSNFUG00015003651
766.294	-1.68237	0.164792	-10.2091	1.8055e-24	3.352e-23	ENSNFUG00015004725	zgc:172121
711.614	-1.69558	0.335358	-5.05602	4.2809e-07	1.53334e-06	ENSNFUG00015010565	col4a5
147.773	-1.70323	0.175353	-9.71316	2.64999e-22	4.19987e-21	ENSNFUG00015012480	slc39a14
547.823	-1.71347	0.139051	-12.3226	6.84489e-35	2.48526e-33	ENSNFUG00015018968	A3GALT2
86.3605	-1.716	0.331556	-5.17559	2.27187e-07	8.45066e-07	ENSNFUG00015023337	INSYN2A
65.7175	-1.72181	0.280717	-6.13363	8.58977e-10	4.30379e-09	ENSNFUG00015001495	spry2
71.3689	-1.72513	0.254986	-6.76561	1.32749e-11	8.13504e-11	ENSNFUG00015002134	Nfu_g_1_009551
108.373	-1.73233	0.387101	-4.47514	7.63626e-06	2.28373e-05	ENSNFUG00015003442	dcc
91.9505	-1.74203	0.367838	-4.73585	2.18137e-06	7.03986e-06	ENSNFUG00015012975
109.439	-1.75175	0.324563	-5.39724	6.76746e-08	2.68419e-07	ENSNFUG00015001295	si:dkey-93h22.7
70.4176	-1.75818	0.256639	-6.85078	7.34499e-12	4.62906e-11	ENSNFUG00015014350
71.9946	-1.76265	0.371212	-4.74835	2.05079e-06	6.64575e-06	ENSNFUG00015025114	neto1
60.0913	-1.76405	0.279674	-6.30753	2.83531e-10	1.50546e-09	ENSNFUG00015015038
290.468	-1.77678	0.172808	-10.2818	8.51123e-25	1.60386e-23	ENSNFUG00015016452	qng1
724.403	-1.78438	0.141367	-12.6223	1.5908e-36	6.19362e-35	ENSNFUG00015019865
89.6901	-1.787	0.175189	-10.2004	1.97417e-24	3.65794e-23	ENSNFUG00015010817
64.436	-1.79168	0.240332	-7.45504	8.98438e-14	6.77749e-13	ENSNFUG00015020442	shisa9a
123.929	-1.81799	0.140976	-12.8958	4.75549e-38	2.03432e-36	ENSNFUG00015015279
120.526	-1.82158	0.138247	-13.1762	1.20272e-39	5.666e-38	ENSNFUG00015002530
54.9279	-1.83531	0.294625	-6.22932	4.68455e-10	2.4205e-09	ENSNFUG00015009658
346.484	-1.84379	0.301028	-6.12496	9.07049e-10	4.529e-09	ENSNFUG00015000214
198.966	-1.84681	0.169435	-10.8998	1.15487e-27	2.69004e-26	ENSNFUG00015008009
2534.06	-1.85989	0.09006	-20.6517	9.42785e-95	2.46748e-92	ENSNFUG00015018979
50.3301	-1.86695	0.326619	-5.71597	1.09083e-08	4.77148e-08	ENSNFUG00015019681
836.033	-1.86875	0.0665069	-28.0986	1.01845e-173	1.19948e-170	ENSNFUG00015022941
486.263	-1.86978	0.120194	-15.5564	1.43938e-54	1.26746e-52	ENSNFUG00015003455	ildr1a
15218.2	-1.87454	0.587908	-3.18849	0.00143019	0.00295412	ENSNFUG00015007606	ba1l
121.807	-1.88166	0.154637	-12.1682	4.58976e-34	1.59281e-32	ENSNFUG00015002983	CHST12
153.503	-1.8822	0.139179	-13.5236	1.1354e-41	5.86176e-40	ENSNFUG00015011404
104.136	-1.88573	0.252186	-7.47754	7.57289e-14	5.76114e-13	ENSNFUG00015008028	gas1b
174.543	-1.88842	0.528003	-3.57654	0.000348178	0.000802971	ENSNFUG00015001324
51.9299	-1.89961	0.251177	-7.56285	3.94329e-14	3.08202e-13	ENSNFUG00015005571	nlrc3
10950.3	-1.90492	0.587678	-3.24143	0.0011893	0.00249596	ENSNFUG00015007598	Nfu_g_1_007730
98.8516	-1.90906	0.266925	-7.15204	8.54969e-13	5.85856e-12	ENSNFUG00015020150	MYOM3
219.345	-1.91541	0.582785	-3.28666	0.00101385	0.00215437	ENSNFUG00015018792	saa
55.1837	-1.91643	0.206734	-9.26998	1.86175e-20	2.53489e-19	ENSNFUG00015006282	tmeff2a
147.537	-1.91729	0.226973	-8.4472	2.9836e-17	3.10281e-16	ENSNFUG00015006714	htr2cl1
69.2148	-1.91833	0.245978	-7.79877	6.25149e-15	5.24969e-14	ENSNFUG00015003048	mat1a
822.545	-1.92208	0.0688302	-27.9249	1.32946e-171	1.3918e-168	ENSNFUG00015021370	Nfu_g_1_013066
118.033	-1.93102	0.119648	-16.1391	1.35561e-58	1.32359e-56	ENSNFUG00015006820	nrsn1
323.73	-1.94244	0.188721	-10.2927	7.603e-25	1.43846e-23	ENSNFUG00015001983
86.2351	-1.96743	0.383166	-5.13466	2.82655e-07	1.0403e-06	ENSNFUG00015020026
109.019	-1.97152	0.196151	-10.051	9.09111e-24	1.62382e-22	ENSNFUG00015011246	SLC25A28
1678.25	-1.98355	0.103303	-19.2013	3.61073e-82	7.56007e-80	ENSNFUG00015012039
370.725	-1.98566	0.135079	-14.7	6.44356e-49	4.59934e-47	ENSNFUG00015016377	igsf8
829.935	-1.99199	0.164636	-12.0994	1.06441e-33	3.64685e-32	ENSNFUG00015006348	serpinh1b
3033.48	-2.04466	0.133411	-15.3259	5.13081e-53	4.31629e-51	ENSNFUG00015013511	hmmr
2281.48	-2.05134	0.195675	-10.4834	1.02949e-25	2.08152e-24	ENSNFUG00015023799
86.0057	-2.05325	0.528897	-3.88213	0.000103546	0.000260789	ENSNFUG00015020764	mss51
6239.71	-2.05426	0.566128	-3.62862	0.000284938	0.000667251	ENSNFUG00015007666	Nfu_g_1_007654
633.857	-2.05526	0.363559	-5.65316	1.57526e-08	6.76264e-08	ENSNFUG00015008403	f5
2405.89	-2.05916	0.0944781	-21.7951	2.58349e-105	7.98088e-103	ENSNFUG00015000127	slc38a2
116.692	-2.05938	0.246302	-8.3612	6.20819e-17	6.26546e-16	ENSNFUG00015020031	vipr2
164.705	-2.05993	0.178332	-11.5511	7.29042e-31	2.12993e-29	ENSNFUG00015004953	serp2
58.0762	-2.07104	0.159933	-12.9494	2.36726e-38	1.03563e-36	ENSNFUG00015015752
1630.01	-2.07732	0.357697	-5.80748	6.34212e-09	2.85911e-08	ENSNFUG00015004023	zgc:136929
1903.56	-2.07837	0.113156	-18.3674	2.39821e-75	4.22354e-73	ENSNFUG00015018193	FAM187A
1560.36	-2.08179	0.109094	-19.0825	3.52984e-81	7.15229e-79	ENSNFUG00015019915	psme2
96.1217	-2.09566	0.16385	-12.7901	1.86327e-37	7.7338e-36	ENSNFUG00015013580	itk
1536.28	-2.10419	0.145242	-14.4874	1.4547e-47	9.72072e-46	ENSNFUG00015005723	Nfu_g_1_011869
68.9472	-2.11461	0.513085	-4.12136	3.76649e-05	0.000101757	ENSNFUG00015019065	lgals3b
234.494	-2.12573	0.33086	-6.42487	1.3198e-10	7.26563e-10	ENSNFUG00015012972	si:dkey-108k21.21
277.924	-2.12845	0.237806	-8.95038	3.54249e-19	4.27641e-18	ENSNFUG00015012309
238.898	-2.12888	0.255374	-8.33629	7.66568e-17	7.67546e-16	ENSNFUG00015003648	adgrb3
874.444	-2.13823	0.0890545	-24.0103	2.16991e-127	1.20264e-124	ENSNFUG00015006950	hdac4
65.2552	-2.14121	0.29325	-7.30166	2.84229e-13	2.02803e-12	ENSNFUG00015004804	slc43a3a
1102.89	-2.15766	0.0506508	-42.5986	0	0	ENSNFUG00015010480	kiaa0895l
63.9443	-2.16268	0.23379	-9.25054	2.23365e-20	3.01944e-19	ENSNFUG00015024418	cd8b
50.2314	-2.17005	0.241662	-8.97967	2.7157e-19	3.32087e-18	ENSNFUG00015014334	rpe65b
112.666	-2.17083	0.198792	-10.9201	9.23635e-28	2.16211e-26	ENSNFUG00015018745	six6a
166.816	-2.18654	0.155598	-14.0526	7.42935e-45	4.45856e-43	ENSNFUG00015013095	cdh17
109.522	-2.19509	0.410804	-5.34341	9.12153e-08	3.56019e-07	ENSNFUG00015008436	Nfu_g_1_006903
118.84	-2.20577	0.553656	-3.98401	6.77631e-05	0.000175571	ENSNFUG00015010627
2461.18	-2.20589	0.0533757	-41.3277	0	0	ENSNFUG00015004861	gba2
102.828	-2.22006	0.182139	-12.1888	3.56505e-34	1.24407e-32	ENSNFUG00015002226
76.4542	-2.26114	0.199373	-11.3412	8.19695e-30	2.21294e-28	ENSNFUG00015009745	brinp3a.2
1008.91	-2.26217	1.01871	-2.22063	0.0263762	0.042272	ENSNFUG00015010608
70.8476	-2.2657	0.169292	-13.3834	7.562e-41	3.74995e-39	ENSNFUG00015016125
115.224	-2.2714	0.47611	-4.77075	1.83543e-06	5.98284e-06	ENSNFUG00015020375
286.53	-2.28353	0.321443	-7.10398	1.21212e-12	8.21196e-12	ENSNFUG00015014467	gstr
233.155	-2.31228	0.162991	-14.1866	1.10923e-45	6.92131e-44	ENSNFUG00015004846	dtx3
66.0534	-2.31305	0.275667	-8.39074	4.83103e-17	4.94223e-16	ENSNFUG00015003476	cacna2d1a
58.8792	-2.3133	0.527908	-4.38201	1.17589e-05	3.419e-05	ENSNFUG00015015772
90.3322	-2.32475	0.192535	-12.0744	1.4415e-33	4.90319e-32	ENSNFUG00015013380	sqlea
54.784	-2.33837	0.283955	-8.23501	1.79548e-16	1.72535e-15	ENSNFUG00015017642	rd3
613.014	-2.34614	0.139652	-16.8	2.44185e-63	2.73894e-61	ENSNFUG00015006982
5910.34	-2.35157	0.106373	-22.1068	2.7175e-108	9.31064e-106	ENSNFUG00015013572	dohh
226.75	-2.36835	0.131312	-18.036	1.0165e-72	1.59624e-70	ENSNFUG00015009586
97.634	-2.3771	0.417411	-5.69487	1.23466e-08	5.36823e-08	ENSNFUG00015006426	si:dkey-219c10.4
63.4328	-2.38628	0.578658	-4.12382	3.72636e-05	0.000100789	ENSNFUG00015016004
1098.59	-2.41259	0.122881	-19.6336	7.98776e-86	1.75025e-83	ENSNFUG00015004715	tmem63a
62.336	-2.41718	0.181934	-13.286	2.79169e-40	1.34889e-38	ENSNFUG00015022100	stox2a
1149.48	-2.44613	0.0744557	-32.8535	1.01547e-236	2.12617e-233	ENSNFUG00015011771	fggy
2461.39	-2.44718	0.165938	-14.7476	3.18855e-49	2.31096e-47	ENSNFUG00015012930	slc25a55a
133.077	-2.45018	0.260012	-9.42334	4.36978e-21	6.24292e-20	ENSNFUG00015017731	dlk2
56.6695	-2.49934	0.285795	-8.74523	2.22567e-18	2.52653e-17	ENSNFUG00015020146	cyb5r2
74.3133	-2.50372	0.27409	-9.13465	6.56204e-20	8.52206e-19	ENSNFUG00015013505	gstt1a
131.93	-2.52155	0.136244	-18.5076	1.793e-76	3.34528e-74	ENSNFUG00015010296
191.908	-2.55161	0.256699	-9.94007	2.78643e-23	4.78647e-22	ENSNFUG00015014774
59.615	-2.55633	0.234548	-10.899	1.16579e-27	2.70878e-26	ENSNFUG00015013295	smpx
69.1921	-2.57787	0.255757	-10.0793	6.81798e-24	1.22593e-22	ENSNFUG00015023235	igfbp1b
103.189	-2.64763	0.419961	-6.30446	2.89203e-10	1.53427e-09	ENSNFUG00015001522	fstl5
116.986	-2.68187	0.234383	-11.4422	2.57186e-30	7.20121e-29	ENSNFUG00015019701	mmrn2
57.345	-2.72123	0.427489	-6.36562	1.94506e-10	1.05173e-09	ENSNFUG00015022733
92.866	-2.72343	0.202815	-13.4282	4.13473e-41	2.08329e-39	ENSNFUG00015005543	H2BC6
177.505	-2.74248	0.199404	-13.7534	4.86193e-43	2.64792e-41	ENSNFUG00015019017
93.2269	-2.78558	0.223153	-12.4828	9.26674e-36	3.50648e-34	ENSNFUG00015014585
79.5557	-2.79409	0.739657	-3.77756	0.000158375	0.000386634	ENSNFUG00015009146	ephb1
461.624	-2.80695	0.126567	-22.1775	5.65837e-109	2.05051e-106	ENSNFUG00015024718	ccng1
71.5894	-2.81934	0.385024	-7.32251	2.43373e-13	1.7511e-12	ENSNFUG00015005383	lrrc2
373.043	-2.84204	0.524001	-5.42373	5.8367e-08	2.33518e-07	ENSNFUG00015010138	cahz
76.1114	-2.88017	0.350392	-8.21986	2.03748e-16	1.94598e-15	ENSNFUG00015023005
380.284	-2.88538	0.17193	-16.7823	3.28717e-63	3.62242e-61	ENSNFUG00015018740	six4a
1500.6	-2.91126	0.126823	-22.9552	1.30722e-116	5.35505e-114	ENSNFUG00015006406	ribc1
117.848	-2.92386	0.444227	-6.58191	4.64455e-11	2.68061e-10	ENSNFUG00015005567
341.567	-2.93531	0.166721	-17.6061	2.21271e-69	3.15881e-67	ENSNFUG00015003451	loxhd1a
62.7425	-2.94349	0.705907	-4.1698	3.04871e-05	8.35026e-05	ENSNFUG00015010237
145.829	-2.96	0.851588	-3.47586	0.000509211	0.00113989	ENSNFUG00015006895	slc17a7b
52.5556	-3.01611	0.2317	-13.0173	9.75761e-39	4.34687e-37	ENSNFUG00015010749
807.66	-3.03486	0.677923	-4.47669	7.58081e-06	2.26894e-05	ENSNFUG00015012842
121.379	-3.03922	0.378558	-8.02842	9.87331e-16	8.85965e-15	ENSNFUG00015002366
880.526	-3.09947	0.116329	-26.6439	2.10514e-156	1.65288e-153	ENSNFUG00015021001	ZDHHC12
74.8397	-3.11886	0.414069	-7.53222	4.98838e-14	3.862e-13	ENSNFUG00015001846	gdpd2
308.913	-3.1566	0.335138	-9.41881	4.56235e-21	6.50817e-20	ENSNFUG00015009692	slc22a16
754.858	-3.17053	0.103149	-30.7374	1.80149e-207	2.61133e-204	ENSNFUG00015020481	FNDC7
210.397	-3.17074	0.218243	-14.5285	7.99866e-48	5.54142e-46	ENSNFUG00015006860
255.348	-3.17668	0.336893	-9.42934	4.12679e-21	5.90472e-20	ENSNFUG00015018432	sema3d
199.12	-3.19407	0.182052	-17.5448	6.52244e-69	9.03742e-67	ENSNFUG00015011521	dmbx1a
79.7374	-3.20491	0.283452	-11.3067	1.21573e-29	3.24953e-28	ENSNFUG00015014524	tuba8l5
63.14	-3.2078	0.395872	-8.10312	5.35655e-16	4.93347e-15	ENSNFUG00015014908
89.8066	-3.27364	0.233234	-14.0358	9.40724e-45	5.59212e-43	ENSNFUG00015005525	H2BC1
391.904	-3.2857	0.108866	-30.1811	4.18792e-200	5.26114e-197	ENSNFUG00015006494	myo16
281.655	-3.2937	0.0827666	-39.7951	0	0	ENSNFUG00015019657
204.18	-3.31709	0.281822	-11.7702	5.56207e-32	1.7527e-30	ENSNFUG00015003776	notch1a
122.314	-3.40239	0.607129	-5.60406	2.09384e-08	8.84826e-08	ENSNFUG00015005514	dok7b
75.5592	-3.42401	0.261876	-13.0749	4.58089e-39	2.07505e-37	ENSNFUG00015023779	pnkd
78.3477	-3.48205	0.297772	-11.6937	1.37288e-31	4.23413e-30	ENSNFUG00015002322	anxa5a
120.042	-3.48606	0.311765	-11.1817	5.01264e-29	1.27992e-27	ENSNFUG00015022981	ANKRD63
106.876	-3.54522	0.341521	-10.3807	3.03549e-25	5.9214e-24	ENSNFUG00015001779	elfn2a
137.708	-3.55652	0.339731	-10.4686	1.2039e-25	2.41344e-24	ENSNFUG00015007734
110.074	-3.5624	0.20245	-17.5965	2.62179e-69	3.71466e-67	ENSNFUG00015015852
162.386	-3.57019	0.455128	-7.84438	4.35107e-15	3.71676e-14	ENSNFUG00015002316	scara3
57.7385	-3.73395	0.830708	-4.4949	6.9603e-06	2.09487e-05	ENSNFUG00015001183	zgc:153372
57.6812	-3.76499	0.570251	-6.60234	4.04724e-11	2.35172e-10	ENSNFUG00015003853
454.249	-3.78614	0.117275	-32.2843	1.16308e-228	1.99246e-225	ENSNFUG00015010634	mdm1
99.1812	-3.903	0.235871	-16.5472	1.67717e-61	1.78557e-59	ENSNFUG00015003434
118.245	-3.90308	0.224503	-17.3854	1.06376e-67	1.39205e-65	ENSNFUG00015004451	SLC2A13
71.8217	-3.91397	0.372671	-10.5025	8.41339e-26	1.70843e-24	ENSNFUG00015016451	KIF5A
374.856	-3.91678	0.22943	-17.0718	2.40675e-65	2.96424e-63	ENSNFUG00015020301	tuba1c
80.6061	-3.96074	0.263183	-15.0494	3.48559e-51	2.72541e-49	ENSNFUG00015001480	APOC2
141.079	-3.99773	0.269476	-14.8352	8.67382e-50	6.43502e-48	ENSNFUG00015002347	scg5
91.9486	-4.0433	0.41319	-9.78556	1.29868e-22	2.1115e-21	ENSNFUG00015010582
68.8764	-4.08784	0.743328	-5.49937	3.81145e-08	1.56171e-07	ENSNFUG00015003223	acot22
1687	-4.12988	0.863327	-4.78368	1.72118e-06	5.63479e-06	ENSNFUG00015018389	MIB2
369.369	-4.15651	0.12952	-32.0917	5.76255e-226	9.04912e-223	ENSNFUG00015020013	ISYNA1
68.5904	-4.18404	0.556845	-7.51383	5.74209e-14	4.41288e-13	ENSNFUG00015017892	mgll
105.74	-4.21009	0.229296	-18.361	2.69719e-75	4.7061e-73	ENSNFUG00015003141
226.469	-4.25793	0.20505	-20.7653	8.91279e-96	2.39932e-93	ENSNFUG00015007833	and2
619.784	-4.31744	0.890306	-4.84939	1.23842e-06	4.14287e-06	ENSNFUG00015011977
68.9718	-4.32107	0.292857	-14.7549	2.86156e-49	2.09005e-47	ENSNFUG00015001417	si:dkey-174m14.3
2555.07	-4.48458	0.276651	-16.2103	4.26792e-59	4.25528e-57	ENSNFUG00015003066	c3b.1
275.322	-4.53908	0.162294	-27.9683	3.94639e-172	4.37446e-169	ENSNFUG00015019363	hdhd2
82.1688	-4.67606	0.221375	-21.1228	4.90798e-99	1.42286e-96	ENSNFUG00015008452	rhobtb2a
908.57	-4.6811	0.324384	-14.4307	3.31532e-47	2.16173e-45	ENSNFUG00015022782	si:zfos-323e3.4
81.8889	-4.85683	0.653378	-7.43342	1.05822e-13	7.92572e-13	ENSNFUG00015000071	PRSS35
336.737	-5.03239	0.465375	-10.8136	2.96725e-27	6.70442e-26	ENSNFUG00015010302
575.994	-5.0479	0.193602	-26.0736	7.26607e-150	5.47687e-147	ENSNFUG00015003146
1167.84	-5.10228	0.319376	-15.9758	1.88476e-57	1.82135e-55	ENSNFUG00015015438	postnb
125.032	-5.14039	0.278998	-18.4245	8.36179e-76	1.51509e-73	ENSNFUG00015010655	cntnap5a
116.609	-5.48164	0.333235	-16.4498	8.41394e-61	8.80846e-59	ENSNFUG00015018046
148.33	-5.48945	0.235476	-23.3121	3.33959e-120	1.61362e-117	ENSNFUG00015007553	lyrm1
135.98	-5.68498	0.714561	-7.9559	1.77832e-15	1.56445e-14	ENSNFUG00015015450	tp53bp2b
237.365	-5.74072	0.173395	-33.1078	2.29789e-240	5.41268e-237	ENSNFUG00015009943	PIP5K1C
56.6946	-5.94916	0.442937	-13.4312	3.97035e-41	2.00583e-39	ENSNFUG00015018456	nop2
105.691	-6.00425	0.334609	-17.9441	5.34117e-72	8.24992e-70	ENSNFUG00015014326	cct4
478.388	-6.06877	0.236472	-25.6638	2.96613e-145	2.07014e-142	ENSNFUG00015005130	pef1
102.15	-6.14564	0.802703	-7.65618	1.9155e-14	1.54123e-13	ENSNFUG00015010184	Nfu_g_1_020056
191.883	-6.39215	0.874423	-7.31013	2.66888e-13	1.90935e-12	ENSNFUG00015011016	dner
382.985	-6.56561	0.286948	-22.8809	7.20712e-116	2.8294e-113	ENSNFUG00015001245
60.2152	-6.63286	0.456647	-14.5251	8.39835e-48	5.79701e-46	ENSNFUG00015023935
1274.73	-6.87839	0.177157	-38.8265	0	0	ENSNFUG00015004186
85.9851	-7.3813	0.657514	-11.2261	3.03635e-29	7.90289e-28	ENSNFUG00015005063
95.6116	-7.94574	0.504244	-15.7577	6.07775e-56	5.53281e-54	ENSNFUG00015002222	cryba4
489.497	-8.47974	1.14098	-7.432	1.06966e-13	8.00824e-13	ENSNFUG00015006249	calml4a
98.1566	-9.55365	2.08932	-4.57261	4.81698e-06	1.47643e-05	ENSNFUG00015022589
191.648	-11.5437	1.49551	-7.71894	1.17301e-14	9.62729e-14	ENSNFUG00015022834
