# Supplementary material
Source: Research Square preprint supplement (doi:10.21203/rs.3.rs-8995976/v1)
Supplement: Supplementary file 2 [file 22f6a831dfc85487fdeaeca5.xlsx]

## Sheet: Sheet 1
category
