# Supplementary material
Source: Research Square preprint supplement (doi:10.21203/rs.3.rs-8995976/v1)
Supplement: Supplementary file 3 [file 430b55b302184dbb1c2673cc.xlsx]

## Sheet: Sheet 1
baseMean	log2FoldChange	lfcSE	stat	pvalue	padj	ensembl	external_gene_name
193.962	10.0407	0.731469	13.7268	7.01486e-43	8.36633e-41	ENSNFUG00015023473	gabrr3a
93.272	9.78701	2.05866	4.75407	1.99361e-06	1.08108e-05	ENSNFUG00015011839
75.5068	7.50465	0.517454	14.503	1.15922e-47	1.63017e-45	ENSNFUG00015020474
105.263	7.04084	1.20929	5.8223	5.80445e-09	4.83978e-08	ENSNFUG00015008983
64.5833	6.85396	0.453645	15.1086	1.42044e-51	2.34797e-49	ENSNFUG00015002412	dusp3b
130.637	6.36203	0.280847	22.653	1.30379e-113	9.4495e-111	ENSNFUG00015024949
209.63	6.31783	0.556092	11.3611	6.53001e-30	3.7862e-28	ENSNFUG00015006722	frmd5a
100.608	6.29097	0.502164	12.5277	5.26451e-36	4.5928e-34	ENSNFUG00015004195
93.7956	6.03914	0.418866	14.4178	3.99734e-47	5.57969e-45	ENSNFUG00015006710	trim54
193.78	6.00486	0.786138	7.63843	2.19883e-14	3.68637e-13	ENSNFUG00015007620
414.584	5.80944	0.362857	16.0103	1.08363e-57	2.08366e-55	ENSNFUG00015022411
56.1693	5.63695	0.350315	16.0911	2.9457e-58	5.78216e-56	ENSNFUG00015013971	ugt5d1
364.265	5.35502	0.145147	36.8938	5.80981e-298	2.1896e-294	ENSNFUG00015014701
71.8644	5.35069	0.272286	19.651	5.66422e-86	2.13473e-83	ENSNFUG00015024662	slc12a5b
155.831	5.31302	0.264054	20.121	4.83361e-90	1.9801e-87	ENSNFUG00015013816	nkx1.2lb
64.6491	5.25597	0.292583	17.9641	3.72584e-72	1.09703e-69	ENSNFUG00015007891	glmnb
547.892	5.14846	0.201461	25.5557	4.74999e-144	4.97271e-141	ENSNFUG00015005244	krt97
211.301	4.87981	0.228077	21.3955	1.47278e-101	7.50083e-99	ENSNFUG00015019730	saga
74.7207	4.81547	0.938589	5.13054	2.88915e-07	1.82084e-06	ENSNFUG00015007361
376.985	4.72784	0.170044	27.8036	3.924e-170	7.39439e-167	ENSNFUG00015019595
87.2109	4.70539	0.295688	15.9133	5.12011e-57	9.5528e-55	ENSNFUG00015013050	cacna2d3
70.5043	4.63502	0.538586	8.60591	7.57149e-18	1.75279e-16	ENSNFUG00015015433	fscn2b
447.588	4.42513	0.17069	25.9249	3.49279e-148	3.87166e-145	ENSNFUG00015020195
695.053	4.38023	0.197906	22.1329	1.52451e-108	9.26704e-106	ENSNFUG00015011150
655.973	4.36555	0.111176	39.2669	0	0	ENSNFUG00015003550
546.664	4.30704	0.193082	22.3068	3.17273e-110	1.9929e-107	ENSNFUG00015007847	slc22a7b.2
954.086	4.28102	0.450291	9.50723	1.95805e-21	6.24322e-20	ENSNFUG00015016649
402.408	4.2327	0.160167	26.4268	6.73686e-154	7.93434e-151	ENSNFUG00015021407	antxr2b
151.97	4.10164	0.228583	17.9438	5.36471e-72	1.55527e-69	ENSNFUG00015014636
60.6737	4.05411	0.223797	18.1151	2.42121e-73	7.24209e-71	ENSNFUG00015007589	fam83b
879.831	3.9593	0.145168	27.2739	8.65294e-164	1.3588e-160	ENSNFUG00015022088	spata18
99.5796	3.75373	0.232003	16.1797	7.01559e-59	1.3916e-56	ENSNFUG00015004965	trmo
100.22	3.70999	0.465107	7.97664	1.50373e-15	2.87094e-14	ENSNFUG00015005425	tyrp1a
227.901	3.57437	0.200109	17.8621	2.32805e-71	6.64693e-69	ENSNFUG00015002902	grik5
58.9192	3.56083	0.334122	10.6573	1.6124e-26	7.37478e-25	ENSNFUG00015009881	cabp5a
94.6282	3.47392	0.377126	9.21158	3.2137e-20	9.31678e-19	ENSNFUG00015024468	slc41a2a
72.8209	3.43086	0.24868	13.7963	2.68458e-43	3.26375e-41	ENSNFUG00015013625	myt1la
160.843	3.41724	0.309275	11.0492	2.21126e-28	1.15747e-26	ENSNFUG00015013453
131.605	3.41655	0.196547	17.3829	1.11261e-67	2.75868e-65	ENSNFUG00015001373	syt14b
1038.84	3.41331	0.300352	11.3644	6.29222e-30	3.65959e-28	ENSNFUG00015024763	cfap210
340.173	3.37991	0.102181	33.0778	6.20079e-240	1.66925e-236	ENSNFUG00015016344	hpcal1
642.012	3.31183	0.123983	26.712	3.41552e-157	4.59728e-154	ENSNFUG00015005370	zufsp
64.479	3.2959	0.725126	4.54527	5.48638e-06	2.75327e-05	ENSNFUG00015020483
88.8449	3.29128	0.61135	5.38362	7.30019e-08	5.09688e-07	ENSNFUG00015003926	ntrk2b
160.258	3.21562	0.552149	5.82382	5.75169e-09	4.80429e-08	ENSNFUG00015016540
690.84	3.19022	0.215522	14.8023	1.4148e-49	2.16752e-47	ENSNFUG00015000241	zgc:175214
341.863	3.17401	0.141685	22.4019	3.76988e-111	2.44964e-108	ENSNFUG00015002661	slc1a3b
65.5921	3.14075	0.470648	6.67326	2.50186e-11	2.88349e-10	ENSNFUG00015013700	hey2
60.2152	3.13968	0.892671	3.51718	0.000436161	0.00147136	ENSNFUG00015023935
410.662	3.13544	0.161442	19.4215	5.07619e-84	1.80483e-81	ENSNFUG00015001603	slc2a15a
742.314	3.11081	0.732274	4.24815	2.1554e-05	9.62699e-05	ENSNFUG00015024514
86.5958	3.09998	0.229199	13.5253	1.10952e-41	1.26713e-39	ENSNFUG00015018440	grik1a
110.404	3.02575	0.331324	9.13233	6.70436e-20	1.9142e-18	ENSNFUG00015018038	rrh
1146.38	3.013	0.22957	13.1245	2.38336e-39	2.42768e-37	ENSNFUG00015022561
82.1163	2.98447	0.21617	13.8061	2.34053e-43	2.86396e-41	ENSNFUG00015014711
136.508	2.95118	0.269871	10.9355	7.79428e-28	3.8969e-26	ENSNFUG00015010803	gys2
243.925	2.91758	0.253294	11.5186	1.06376e-30	6.59393e-29	ENSNFUG00015018481	syne2b
65.8563	2.91473	0.171236	17.0217	5.67248e-65	1.33615e-62	ENSNFUG00015006639	trpc6b
75.6718	2.90887	0.276099	10.5356	5.91842e-26	2.62416e-24	ENSNFUG00015014702
285.476	2.90831	0.192884	15.078	2.25927e-51	3.70205e-49	ENSNFUG00015009369
121.981	2.86119	0.161044	17.7665	1.28495e-70	3.50921e-68	ENSNFUG00015009627
135.555	2.85839	0.620668	4.60534	4.11785e-06	2.11148e-05	ENSNFUG00015017009	adamts13
316.396	2.8421	0.137185	20.7173	2.41789e-95	1.08483e-92	ENSNFUG00015007104	Nfu_g_1_016565
96.9295	2.80197	0.220864	12.6864	7.03377e-37	6.34183e-35	ENSNFUG00015003385	inpp4b
76.2117	2.76597	0.306445	9.02599	1.78077e-19	4.93481e-18	ENSNFUG00015006692	OSBPL1A
66.6405	2.74969	0.247956	11.0894	1.41211e-28	7.49569e-27	ENSNFUG00015013090	SNX4
153.472	2.74069	0.155262	17.652	9.81411e-70	2.60475e-67	ENSNFUG00015018949	ARSI
70.4075	2.73838	0.30609	8.94632	3.67519e-19	9.76802e-18	ENSNFUG00015012578
84.6225	2.73028	0.233723	11.6817	1.58127e-31	1.03105e-29	ENSNFUG00015021709	slc22a6l
89.1938	2.72354	0.196806	13.8387	1.48846e-43	1.83324e-41	ENSNFUG00015002135	arrb1
298.19	2.71452	0.176166	15.4089	1.42644e-53	2.46604e-51	ENSNFUG00015014411	Nfu_g_1_012687
78.6202	2.69653	0.769461	3.50444	0.000457561	0.00153285	ENSNFUG00015002021
252.691	2.67469	0.212847	12.5662	3.23776e-36	2.86984e-34	ENSNFUG00015010556	b3gnt5b
66.2973	2.67281	0.5029	5.3148	1.06776e-07	7.25336e-07	ENSNFUG00015007172
151.6	2.65174	0.245445	10.8038	3.3018e-27	1.58318e-25	ENSNFUG00015016162
194.848	2.65116	0.707197	3.74882	0.000177669	0.000655569	ENSNFUG00015016640
263.041	2.64867	0.132769	19.9494	1.51773e-88	6.08513e-86	ENSNFUG00015010833
62.9424	2.61583	0.215219	12.1543	5.44176e-34	4.08544e-32	ENSNFUG00015000379
452.4	2.58768	0.886171	2.92007	0.00349956	0.00942756	ENSNFUG00015009000	fam241a
545.694	2.56324	0.273554	9.37017	7.24182e-21	2.21175e-19	ENSNFUG00015019120	klf9
984.693	2.5266	0.307881	8.20644	2.27853e-16	4.64681e-15	ENSNFUG00015015773	cebpb
85.0503	2.47765	0.279391	8.86805	7.44395e-19	1.90589e-17	ENSNFUG00015000907
68.4816	2.47616	0.183619	13.4853	1.90863e-41	2.11566e-39	ENSNFUG00015019405	unc5a
714.113	2.44443	0.992309	2.46338	0.0137634	0.0311577	ENSNFUG00015021774	tspo
194.198	2.43542	0.200892	12.123	7.97423e-34	5.93938e-32	ENSNFUG00015025426	TMEM47
158.082	2.43372	0.387547	6.27983	3.38954e-10	3.35641e-09	ENSNFUG00015002616	mylk5
85.9434	2.38891	0.28023	8.52482	1.53052e-17	3.46232e-16	ENSNFUG00015019713	abcc8
156.885	2.37953	0.183125	12.9941	1.32231e-38	1.29107e-36	ENSNFUG00015017239
449.388	2.37791	0.113033	21.0373	2.98958e-98	1.40839e-95	ENSNFUG00015004014	asb13a.1
1050.99	2.35832	0.237438	9.93237	3.01012e-23	1.09715e-21	ENSNFUG00015021761	bbof1b
664.29	2.35725	0.623165	3.7827	0.000155135	0.000579574	ENSNFUG00015022546	ARHGAP40
243.833	2.33959	0.811029	2.88472	0.00391761	0.0104021	ENSNFUG00015007820
105.735	2.30245	0.208489	11.0435	2.35652e-28	1.22332e-26	ENSNFUG00015009721	ADAM11
204.453	2.29979	0.278405	8.26057	1.44982e-16	3.00224e-15	ENSNFUG00015025196	rbp4l
51.6447	2.29627	0.264097	8.69483	3.4736e-18	8.35971e-17	ENSNFUG00015002002	abcg8
331.439	2.25683	0.397872	5.67224	1.40939e-08	1.10202e-07	ENSNFUG00015017453
90.6228	2.22075	0.18101	12.2686	1.33522e-34	1.03956e-32	ENSNFUG00015019852	pnp4b
103.734	2.21254	0.301418	7.34046	2.12857e-13	3.14348e-12	ENSNFUG00015006241
56.4087	2.20305	0.318349	6.92023	4.5091e-12	5.71032e-11	ENSNFUG00015013643	agxta
221.985	2.194	0.107695	20.3723	2.94454e-92	1.2904e-89	ENSNFUG00015008652	MPV17L
99.7657	2.16983	0.188371	11.5189	1.05907e-30	6.58653e-29	ENSNFUG00015003148	nrxn2b
266.789	2.16007	0.188768	11.443	2.54885e-30	1.51995e-28	ENSNFUG00015023236	lingo2b
439.532	2.14669	0.134379	15.9749	1.91225e-57	3.63983e-55	ENSNFUG00015000591	ppm1ka
68.8764	2.14548	0.77993	2.75086	0.0059439	0.0149842	ENSNFUG00015003223	acot22
92.8396	2.14311	0.24065	8.90552	5.3136e-19	1.38683e-17	ENSNFUG00015015753	pcbd1
207.236	2.14281	0.203928	10.5077	7.96187e-26	3.48915e-24	ENSNFUG00015019761	myoc
122.208	2.12479	0.120921	17.5717	4.05922e-69	1.06239e-66	ENSNFUG00015009805
355.097	2.11408	0.212067	9.96893	2.08461e-23	7.68735e-22	ENSNFUG00015001467	dusp1
324.673	2.09384	0.482393	4.34054	1.42134e-05	6.6035e-05	ENSNFUG00015007488	acy3.1
94.1963	2.08839	0.213249	9.7932	1.20426e-22	4.16387e-21	ENSNFUG00015001941	abcg5
1206.1	2.08573	0.122301	17.0541	3.25866e-65	7.77294e-63	ENSNFUG00015017401
2240.95	2.06966	0.0542332	38.1622	0	0	ENSNFUG00015023046	tars3
61.9595	2.05463	0.199791	10.2839	8.32787e-25	3.44146e-23	ENSNFUG00015006668	nsg2
256.064	2.04989	0.520118	3.9412	8.10734e-05	0.000323264	ENSNFUG00015020566	si:dkey-15h8.17
459.256	2.04066	0.121536	16.7905	2.86251e-63	6.49894e-61	ENSNFUG00015022727
53.2893	2.03614	0.304623	6.68413	2.32301e-11	2.68722e-10	ENSNFUG00015006880	c1qtnf9
1417.81	2.03222	0.198743	10.2254	1.52621e-24	6.18492e-23	ENSNFUG00015008751	PLCB4
201.355	2.02945	0.176433	11.5027	1.27847e-30	7.84738e-29	ENSNFUG00015005100	tmem110l
77.6257	2.0115	0.133993	15.012	6.12643e-51	9.86722e-49	ENSNFUG00015019057
88.2926	1.98685	0.348662	5.6985	1.20863e-08	9.58813e-08	ENSNFUG00015017012	CR762483.1
212.06	1.98496	0.176926	11.2191	3.28429e-29	1.81493e-27	ENSNFUG00015022355	gnb3b
318.36	1.98473	0.159443	12.4479	1.4357e-35	1.20778e-33	ENSNFUG00015001546	GABRA5
182.606	1.98269	0.137778	14.3905	5.93961e-47	8.16978e-45	ENSNFUG00015013630	krt1-19d
76.0898	1.98128	0.4608	4.29965	1.71067e-05	7.77893e-05	ENSNFUG00015005031	lrrc4ba
122.921	1.95975	0.283917	6.90253	5.10837e-12	6.42605e-11	ENSNFUG00015017701	tgfbr2b
433.564	1.95232	0.100145	19.4949	1.21235e-84	4.39336e-82	ENSNFUG00015012867	tulp1b
434.417	1.93778	0.398095	4.86762	1.12953e-06	6.42077e-06	ENSNFUG00015012906	ASB15
128.869	1.92376	0.117082	16.4308	1.15122e-60	2.35801e-58	ENSNFUG00015001696
109.875	1.92343	0.14254	13.4939	1.69774e-41	1.90429e-39	ENSNFUG00015011461	gnmt
118.779	1.91481	0.688281	2.78202	0.0054021	0.0137974	ENSNFUG00015012785	tfa
60.4007	1.89594	0.262445	7.22412	5.04352e-13	7.12979e-12	ENSNFUG00015016464	mllt11
162.818	1.89408	0.121658	15.5689	1.18466e-54	2.10601e-52	ENSNFUG00015002172
2281.48	1.89355	0.189895	9.9716	2.02928e-23	7.498e-22	ENSNFUG00015023799
449.494	1.88547	0.25546	7.38067	1.575e-13	2.37625e-12	ENSNFUG00015016429	TSPAN8
122.017	1.87658	0.15544	12.0727	1.47188e-33	1.07922e-31	ENSNFUG00015015806
854.583	1.87452	0.0925722	20.2492	3.60706e-91	1.54481e-88	ENSNFUG00015012166	DFNA5
171.264	1.87084	0.24494	7.63796	2.20697e-14	3.69673e-13	ENSNFUG00015017912	tagapb
83.7254	1.86323	0.331028	5.62862	1.81658e-08	1.39664e-07	ENSNFUG00015024682	KCNH4
357.348	1.86177	0.597978	3.11344	0.00184922	0.00535525	ENSNFUG00015018923
50.6322	1.86129	0.196029	9.49502	2.20177e-21	6.99666e-20	ENSNFUG00015006988	twf2b
209.191	1.84113	0.248063	7.42204	1.15327e-13	1.77695e-12	ENSNFUG00015016845	tpd52l2a
184.407	1.839	0.119467	15.3934	1.81242e-53	3.10484e-51	ENSNFUG00015000052	gas2l3
116.611	1.83836	0.209378	8.78011	1.63309e-18	4.05454e-17	ENSNFUG00015014630	ndrg4
222.41	1.83482	0.186495	9.83845	7.68862e-23	2.70307e-21	ENSNFUG00015012354	lrrc23
349.057	1.82977	0.0987581	18.5278	1.2317e-76	3.93393e-74	ENSNFUG00015019779
299.769	1.82943	0.455215	4.01883	5.84888e-05	0.00024091	ENSNFUG00015018904	myadma
52.2738	1.8264	0.255856	7.1384	9.44265e-13	1.29976e-11	ENSNFUG00015009720	si:dkeyp-59c12.1
121.515	1.824	0.202686	8.9991	2.27576e-19	6.19339e-18	ENSNFUG00015007918	kiaa0319
97.7968	1.82319	0.284145	6.41642	1.39519e-10	1.46713e-09	ENSNFUG00015006486	itga9
327.644	1.81935	0.154027	11.8119	3.38759e-32	2.29625e-30	ENSNFUG00015011275	map3k15
55.1095	1.81927	0.206056	8.82901	1.05606e-18	2.67119e-17	ENSNFUG00015002375
62.1293	1.81591	0.226523	8.01643	1.0886e-15	2.1018e-14	ENSNFUG00015006891	gria4b
901.061	1.80711	0.180118	10.0329	1.09207e-23	4.14065e-22	ENSNFUG00015023142
355.498	1.80615	0.173563	10.4063	2.32138e-25	9.91931e-24	ENSNFUG00015015176
215.903	1.79894	0.175506	10.25	1.18376e-24	4.84929e-23	ENSNFUG00015000155	sall1a
200.138	1.79435	0.127662	14.0555	7.12998e-45	9.33037e-43	ENSNFUG00015022379	lrrc31
1336.27	1.77813	0.087934	20.2212	6.36638e-91	2.66596e-88	ENSNFUG00015004210	klhl3
448.915	1.77709	0.27438	6.47675	9.37178e-11	1.00858e-09	ENSNFUG00015011812
215.683	1.77689	0.449146	3.95615	7.61674e-05	0.000305904	ENSNFUG00015012267
232.199	1.76349	0.144472	12.2064	2.87171e-34	2.18203e-32	ENSNFUG00015018977	ccdc30
132.782	1.76289	0.377016	4.6759	2.92665e-06	1.53878e-05	ENSNFUG00015010934	SLC9A9
73.9991	1.75556	0.19717	8.90377	5.39816e-19	1.40307e-17	ENSNFUG00015014899
389.518	1.75523	0.162361	10.8107	3.06461e-27	1.47697e-25	ENSNFUG00015007852
272.942	1.75027	0.204598	8.55466	1.18214e-17	2.69689e-16	ENSNFUG00015007457	si:dkey-69o16.5
173.737	1.74377	0.393294	4.43375	9.26073e-06	4.45404e-05	ENSNFUG00015006183	GPR4
117.261	1.72823	0.202242	8.54535	1.28147e-17	2.91643e-16	ENSNFUG00015021426	CLPTM1L
122.048	1.72569	0.221265	7.79921	6.22976e-15	1.10644e-13	ENSNFUG00015015588
150.652	1.7204	0.196034	8.77601	1.69379e-18	4.18868e-17	ENSNFUG00015022988
74.8232	1.71473	0.290703	5.89855	3.6672e-09	3.17869e-08	ENSNFUG00015005238
600.385	1.71308	0.351724	4.87052	1.11306e-06	6.33862e-06	ENSNFUG00015017743	necap1
398.165	1.7117	0.088453	19.3516	1.97772e-83	6.90153e-81	ENSNFUG00015018611	dgke
117.185	1.70804	0.112376	15.1994	3.56915e-52	5.95195e-50	ENSNFUG00015023565	RNF207
102.354	1.70623	0.347104	4.91563	8.84984e-07	5.14235e-06	ENSNFUG00015002433	slc47a3
51.5563	1.70292	0.27044	6.29685	3.03748e-10	3.03974e-09	ENSNFUG00015007613	adamtsl5
286.567	1.70261	0.305348	5.57596	2.46167e-08	1.85774e-07	ENSNFUG00015006997	si:dkey-76k16.5
578	1.68995	0.0799588	21.1353	3.76801e-99	1.82063e-96	ENSNFUG00015020166	PACS1
117.524	1.6866	0.189419	8.90409	5.38241e-19	1.40091e-17	ENSNFUG00015024147
156.872	1.68656	0.129477	13.0259	8.7142e-39	8.64265e-37	ENSNFUG00015024171	ano9a
359.238	1.68504	0.252915	6.66248	2.69254e-11	3.09379e-10	ENSNFUG00015001390	jag2b
429.198	1.67678	0.122354	13.7043	9.56388e-43	1.13347e-40	ENSNFUG00015010831	nipsnap1
1066.3	1.67131	0.112818	14.8142	1.18639e-49	1.83248e-47	ENSNFUG00015021864
128.859	1.66929	0.408434	4.08705	4.36885e-05	0.000184135	ENSNFUG00015025284	ccn1
341.087	1.66787	0.186556	8.94029	3.88137e-19	1.03015e-17	ENSNFUG00015021266
90.7846	1.66129	0.206929	8.02831	9.88231e-16	1.91982e-14	ENSNFUG00015010463
981.046	1.66015	0.502508	3.30372	0.000954098	0.00296977	ENSNFUG00015001764	qdpra
4211.04	1.6601	0.0762205	21.7803	3.57056e-105	2.0389e-102	ENSNFUG00015017120
513.163	1.65691	0.167863	9.87058	5.58389e-23	1.98534e-21	ENSNFUG00015009092
338.299	1.65137	0.151239	10.9189	9.36051e-28	4.64183e-26	ENSNFUG00015014768	pgap1
282.987	1.65126	0.281199	5.8722	4.30051e-09	3.68694e-08	ENSNFUG00015005428	KLF2
62.1401	1.64453	0.376316	4.37009	1.24195e-05	5.83264e-05	ENSNFUG00015001939
146.824	1.6286	0.281884	5.77755	7.57942e-09	6.21255e-08	ENSNFUG00015010283
78.2738	1.62613	0.321014	5.0656	4.0711e-07	2.50215e-06	ENSNFUG00015016766	sostdc1a
343.174	1.62597	0.168403	9.65524	4.67078e-22	1.56057e-20	ENSNFUG00015009256	nr1d2a
92.7319	1.61804	0.209226	7.73345	1.0467e-14	1.81621e-13	ENSNFUG00015016243	cax1
497.18	1.61684	0.289221	5.59032	2.26656e-08	1.71807e-07	ENSNFUG00015008025	AP3B2
111.521	1.61614	0.167812	9.63068	5.93367e-22	1.96165e-20	ENSNFUG00015024665
237.17	1.61378	0.203003	7.94953	1.87223e-15	3.53157e-14	ENSNFUG00015004217	lrmp
139.741	1.61368	0.160617	10.0468	9.49396e-24	3.64367e-22	ENSNFUG00015005517
57.0631	1.60994	0.156105	10.3132	6.14006e-25	2.55981e-23	ENSNFUG00015024005
50.4754	1.60465	0.270007	5.94301	2.79836e-09	2.46758e-08	ENSNFUG00015024431
50.132	1.60217	0.223114	7.18093	6.9237e-13	9.6573e-12	ENSNFUG00015023903
69.5143	1.60127	0.156579	10.2266	1.50651e-24	6.11825e-23	ENSNFUG00015008612	ARF3
71.3879	1.59809	0.21375	7.47644	7.63601e-14	1.20312e-12	ENSNFUG00015003974	glt8d2
195.936	1.59717	0.332861	4.79832	1.60005e-06	8.84463e-06	ENSNFUG00015003951
352.623	1.59346	0.235517	6.76583	1.32548e-11	1.58889e-10	ENSNFUG00015002854	rab3db
116.755	1.58601	0.422732	3.75182	0.000175554	0.000648529	ENSNFUG00015010598	neff2
70.6723	1.58413	0.180955	8.75427	2.05423e-18	5.04034e-17	ENSNFUG00015021188	tmem182a
87.1795	1.58045	0.157247	10.0508	9.11703e-24	3.51332e-22	ENSNFUG00015001276	glra3
378.286	1.57858	0.276901	5.70088	1.19194e-08	9.48116e-08	ENSNFUG00015002643	arrdc3b
194.183	1.57646	0.11761	13.4041	5.72324e-41	6.23403e-39	ENSNFUG00015004213	niban2a
611.462	1.57624	0.158931	9.91772	3.48617e-23	1.26577e-21	ENSNFUG00015020499	Nfu_g_1_019980
117.638	1.56995	0.130811	12.0017	3.4821e-33	2.51405e-31	ENSNFUG00015019850	nde1
763.087	1.56679	0.224445	6.98074	2.93633e-12	3.83186e-11	ENSNFUG00015016467	cebpd
1039.03	1.55969	0.0646223	24.1355	1.06014e-128	9.08057e-126	ENSNFUG00015024515	HDAC4
129.866	1.54648	0.330459	4.67979	2.87166e-06	1.51324e-05	ENSNFUG00015004899	CACNG5
1261.27	1.54487	0.63978	2.4147	0.0157483	0.0350078	ENSNFUG00015006320	WU:FK11D03
68.4115	1.54141	0.434487	3.54765	0.000388678	0.00132878	ENSNFUG00015004466
89.0338	1.54133	0.257802	5.97875	2.24859e-09	2.0139e-08	ENSNFUG00015007848
4613.34	1.54064	0.203208	7.58157	3.41411e-14	5.60414e-13	ENSNFUG00015001509	apoeb
152.895	1.53949	0.162786	9.45714	3.16469e-21	9.84082e-20	ENSNFUG00015004558	swap70a
63.721	1.53792	0.183378	8.38661	5.00359e-17	1.08128e-15	ENSNFUG00015011477
341.767	1.52845	0.206072	7.41706	1.19752e-13	1.83463e-12	ENSNFUG00015020686	rasgef1bb
149.336	1.52821	0.176091	8.6785	4.01007e-18	9.57742e-17	ENSNFUG00015012568	pthlha
804.836	1.52093	0.140942	10.7912	3.78946e-27	1.8124e-25	ENSNFUG00015017865	nfkbiaa
282.003	1.51792	0.171	8.87671	6.8865e-19	1.76797e-17	ENSNFUG00015013793
131.958	1.51528	0.211778	7.15503	8.36562e-13	1.15913e-11	ENSNFUG00015021730	cables2b
128.754	1.51287	0.135003	11.2062	3.80019e-29	2.08171e-27	ENSNFUG00015011958
137.654	1.51245	0.201803	7.4947	6.64517e-14	1.05762e-12	ENSNFUG00015023788	gadd45ba
327.768	1.51169	0.0674563	22.41	3.14532e-111	2.1168e-108	ENSNFUG00015011994
428.871	1.51013	0.200387	7.53607	4.84333e-14	7.84086e-13	ENSNFUG00015024628
78.0777	1.50737	0.434595	3.46844	0.000523481	0.00173091	ENSNFUG00015025143	tifa
463.688	1.50156	0.519418	2.89085	0.00384206	0.0102317	ENSNFUG00015001398	slc4a1a
180.15	1.49997	0.195577	7.66947	1.7271e-14	2.93467e-13	ENSNFUG00015012966
249.2	1.49996	0.122231	12.2715	1.28804e-34	1.00713e-32	ENSNFUG00015024582	cry1b
652.747	1.49752	0.0634655	23.5958	4.25234e-123	3.3388e-120	ENSNFUG00015014098
115.682	1.49746	0.181277	8.26059	1.44958e-16	3.00224e-15	ENSNFUG00015015905
331.057	1.49666	0.0902799	16.578	1.00486e-61	2.2018e-59	ENSNFUG00015019336	ctnnal1
1746.01	1.49485	0.336071	4.44802	8.66669e-06	4.18971e-05	ENSNFUG00015013878	tgm2b
87.9831	1.49417	0.149825	9.97277	2.00557e-23	7.43954e-22	ENSNFUG00015014679	pglyrp6
53.5555	1.49193	0.20777	7.18068	6.9363e-13	9.66773e-12	ENSNFUG00015015263
135.595	1.4867	0.149084	9.97221	2.01686e-23	7.46673e-22	ENSNFUG00015003719	kcnh5a
601.597	1.486	0.0890327	16.6905	1.53693e-62	3.40729e-60	ENSNFUG00015007791	slc37a4b
2022.08	1.48402	0.104934	14.1424	2.08076e-45	2.78084e-43	ENSNFUG00015016943
184.772	1.47594	0.105733	13.9591	2.7686e-44	3.54908e-42	ENSNFUG00015018261	ZC3H12D
106.269	1.47327	0.132145	11.1489	7.2499e-29	3.89223e-27	ENSNFUG00015012502	SRRM3
230.642	1.4642	0.184291	7.94503	1.94146e-15	3.64028e-14	ENSNFUG00015005561	gulp1a
116.059	1.46273	0.138973	10.5253	6.60204e-26	2.91356e-24	ENSNFUG00015024558	fam167ab
59.0988	1.4615	0.243906	5.99207	2.07192e-09	1.86364e-08	ENSNFUG00015000980	fosab
193.716	1.45282	0.332167	4.37377	1.22119e-05	5.74161e-05	ENSNFUG00015012140	mybphb
115.009	1.44922	0.193253	7.49909	6.42643e-14	1.02453e-12	ENSNFUG00015003297	DVL3
302.935	1.44872	0.129291	11.2052	3.84643e-29	2.10093e-27	ENSNFUG00015019496
118.521	1.44814	0.446766	3.24138	0.00118955	0.00361164	ENSNFUG00015012371	cxcr4a
138.812	1.44629	0.137707	10.5027	8.39562e-26	3.6707e-24	ENSNFUG00015005696	slc4a10a
150.681	1.44381	0.228962	6.30589	2.86545e-10	2.87981e-09	ENSNFUG00015002333	ier2b
91.6092	1.44285	0.134561	10.7227	7.96617e-27	3.7435e-25	ENSNFUG00015014615
619.695	1.44275	0.110972	13.001	1.20778e-38	1.18538e-36	ENSNFUG00015008628	C8orf82
58.3139	1.44221	0.202907	7.10773	1.1797e-12	1.60973e-11	ENSNFUG00015015834
65.1862	1.44206	0.198187	7.27625	3.4324e-13	4.95633e-12	ENSNFUG00015023181
155.999	1.43991	0.118659	12.1349	6.90005e-34	5.1597e-32	ENSNFUG00015012538	atp8b2
337.401	1.43968	0.167719	8.58388	9.17238e-18	2.11301e-16	ENSNFUG00015008546	hspbap1
305.277	1.43955	0.183867	7.8293	4.90605e-15	8.82996e-14	ENSNFUG00015023196	larp6a
134.465	1.43566	0.166918	8.60102	7.9014e-18	1.82692e-16	ENSNFUG00015014715
114.072	1.43429	0.145223	9.87647	5.2653e-23	1.88272e-21	ENSNFUG00015016932	hbegfa
67.8981	1.43417	0.272444	5.26411	1.40868e-07	9.3667e-07	ENSNFUG00015013895
59.6289	1.42803	0.299714	4.76464	1.89195e-06	1.02921e-05	ENSNFUG00015015912	fam20a
63.7653	1.41476	0.203149	6.96412	3.30456e-12	4.27393e-11	ENSNFUG00015005379	msrab
151.191	1.41391	0.252419	5.60147	2.12547e-08	1.61893e-07	ENSNFUG00015013879	agpat4
110.912	1.41367	0.159379	8.86987	7.32307e-19	1.8775e-17	ENSNFUG00015023118	lhfpl4b
130.559	1.41104	0.368009	3.83426	0.000125941	0.000480898	ENSNFUG00015015418	mybpc2b
85.0682	1.40549	0.192952	7.28412	3.23773e-13	4.68464e-12	ENSNFUG00015006561
63.4476	1.40504	0.216263	6.49691	8.19864e-11	8.92005e-10	ENSNFUG00015024589	si:dkey-178k16.1
99.1756	1.4013	0.155945	8.98589	2.56647e-19	6.93866e-18	ENSNFUG00015002701
63.925	1.3981	0.189078	7.39433	1.42122e-13	2.15284e-12	ENSNFUG00015006246	spegb
69.1467	1.39805	0.263861	5.29842	1.16807e-07	7.87517e-07	ENSNFUG00015009289	pcdh19
280.893	1.39734	0.308795	4.52514	6.03547e-06	3.00482e-05	ENSNFUG00015002164	ccn2a
145.082	1.39422	0.191407	7.28406	3.23928e-13	4.68464e-12	ENSNFUG00015010411	egln3
171.209	1.38764	0.139349	9.958	2.3269e-23	8.54738e-22	ENSNFUG00015016122	spata20
495.496	1.38726	0.184767	7.50816	5.99631e-14	9.59205e-13	ENSNFUG00015021570	zgc:101858
4479.67	1.38662	0.259208	5.34946	8.82156e-08	6.0647e-07	ENSNFUG00015015253	fam8a1a
2680.59	1.38635	0.189025	7.33418	2.2308e-13	3.28864e-12	ENSNFUG00015018866	zgc:113531
74.6786	1.3827	0.392555	3.52231	0.000427807	0.00144681	ENSNFUG00015009031	U3
52.2886	1.37486	0.203786	6.74657	1.51378e-11	1.802e-10	ENSNFUG00015007184	fah
165.604	1.36886	0.177219	7.72409	1.12655e-14	1.94403e-13	ENSNFUG00015009396	tnmd
60.7948	1.3681	0.174054	7.86019	3.8355e-15	6.96974e-14	ENSNFUG00015009336
137.444	1.36576	0.253874	5.37967	7.46225e-08	5.20617e-07	ENSNFUG00015008794	gadd45ab
50.807	1.36434	0.198216	6.88311	5.85589e-12	7.32725e-11	ENSNFUG00015021539
261.518	1.36415	0.181698	7.50778	6.01364e-14	9.61163e-13	ENSNFUG00015002275	P2RY6
72.8515	1.36307	0.208898	6.52504	6.79853e-11	7.45701e-10	ENSNFUG00015022384	vwa5b2
71.5894	1.36025	0.402043	3.38333	0.000716115	0.00229342	ENSNFUG00015005383	lrrc2
74.5851	1.35865	0.127605	10.6474	1.79392e-26	8.16535e-25	ENSNFUG00015014815
144.706	1.3583	0.287641	4.72219	2.33315e-06	1.25081e-05	ENSNFUG00015024762
52.6482	1.3569	0.181841	7.46204	8.51943e-14	1.33561e-12	ENSNFUG00015015887
2065.33	1.35653	0.39493	3.43486	0.00059287	0.00193791	ENSNFUG00015014000	star
716.985	1.33783	0.0719687	18.5891	3.93551e-77	1.27863e-74	ENSNFUG00015005975	usp49
53.4165	1.33747	0.341068	3.92142	8.80278e-05	0.000348487	ENSNFUG00015023517	sdr42e2
194.818	1.33698	0.125324	10.6682	1.43386e-26	6.59015e-25	ENSNFUG00015017348	mpp2a
2344.81	1.33207	0.100087	13.3092	2.04707e-40	2.17937e-38	ENSNFUG00015014329	BX248124.2
579.829	1.33174	0.0909748	14.6386	1.59341e-48	2.3097e-46	ENSNFUG00015013954	cpt1a2b
213.164	1.3312	0.171638	7.75586	8.77476e-15	1.5353e-13	ENSNFUG00015013767
922.826	1.33062	0.137289	9.69212	3.25707e-22	1.09796e-20	ENSNFUG00015000169
755.24	1.32833	0.108577	12.234	2.04565e-34	1.5734e-32	ENSNFUG00015021715	THSD1
70.2666	1.32681	0.223232	5.94364	2.78766e-09	2.4593e-08	ENSNFUG00015019031	phlda2
293.876	1.32033	0.0882374	14.9634	1.27326e-50	2.03334e-48	ENSNFUG00015016972	malsu1
1411.27	1.31836	0.0673904	19.563	3.19788e-85	1.18159e-82	ENSNFUG00015013566	zgc:123305
880.52	1.31458	0.0775658	16.9479	1.99426e-64	4.5829e-62	ENSNFUG00015012474
251.672	1.31443	0.0965438	13.6148	3.26939e-42	3.77965e-40	ENSNFUG00015000451	Nfu_g_1_003722
118.549	1.31338	0.178071	7.37556	1.6365e-13	2.45722e-12	ENSNFUG00015015116
74.2457	1.31099	0.143663	9.12547	7.14278e-20	2.03014e-18	ENSNFUG00015022097	TMEM158
126.147	1.31044	0.168385	7.78243	7.11458e-15	1.25531e-13	ENSNFUG00015002499	lpar4
174.874	1.30208	0.185638	7.01408	2.3146e-12	3.04583e-11	ENSNFUG00015015534	smad9
54.0689	1.30021	0.237268	5.47994	4.25476e-08	3.08609e-07	ENSNFUG00015006316	uncx4.1
75.3579	1.29927	0.320661	4.05185	5.08141e-05	0.000211798	ENSNFUG00015007846	NEURL
65.3922	1.29788	0.231805	5.59904	2.15542e-08	1.63843e-07	ENSNFUG00015020641	nab2
666.115	1.29463	0.083196	15.5611	1.33685e-54	2.35435e-52	ENSNFUG00015022208	psma6l
275.303	1.29432	0.140682	9.20038	3.5668e-20	1.03245e-18	ENSNFUG00015010466	airim
60.9173	1.29377	0.226033	5.72378	1.0418e-08	8.36455e-08	ENSNFUG00015011364	cd59a
850.332	1.29375	0.569852	2.27033	0.0231874	0.0490232	ENSNFUG00015023275
184.522	1.29354	0.211312	6.12149	9.27023e-10	8.64365e-09	ENSNFUG00015018421	ackr4b
162.063	1.29318	0.137186	9.4265	4.24015e-21	1.31417e-19	ENSNFUG00015023515	gba3
197.696	1.29308	0.1482	8.72523	2.65631e-18	6.44215e-17	ENSNFUG00015011497
3845.43	1.29155	0.179128	7.21022	5.58604e-13	7.87309e-12	ENSNFUG00015014936
76.8406	1.29146	0.299584	4.31085	1.62629e-05	7.4275e-05	ENSNFUG00015015368	ace
728.134	1.28608	0.101898	12.6212	1.61376e-36	1.44122e-34	ENSNFUG00015019206	hspa4l
308.889	1.28417	0.186231	6.89556	5.36543e-12	6.73593e-11	ENSNFUG00015004587
51.3784	1.28363	0.19144	6.70515	2.01201e-11	2.35347e-10	ENSNFUG00015018373	runx1t1
2113.87	1.27992	0.152942	8.36865	5.82817e-17	1.25087e-15	ENSNFUG00015000188
122.248	1.27746	0.136242	9.37638	6.82786e-21	2.0887e-19	ENSNFUG00015001936	b3galt11
69.0924	1.27024	0.161032	7.88815	3.0671e-15	5.65523e-14	ENSNFUG00015015750
173.607	1.27014	0.243849	5.20872	1.90145e-07	1.23598e-06	ENSNFUG00015008496	Nfu_g_1_009099
153.66	1.26815	0.225243	5.63014	1.80064e-08	1.38608e-07	ENSNFUG00015003075
282.175	1.26675	0.126114	10.0444	9.72059e-24	3.72307e-22	ENSNFUG00015000631	si:ch211-212k18.5
104.342	1.26537	0.247411	5.11446	3.14643e-07	1.97374e-06	ENSNFUG00015011889	slc23a1
60.5639	1.26529	0.292901	4.31986	1.56129e-05	7.17759e-05	ENSNFUG00015024695	pappa2
55.3598	1.26451	0.408959	3.09202	0.00198797	0.00571405	ENSNFUG00015022858	mmp9
371.889	1.26449	0.0973901	12.9838	1.51198e-38	1.46865e-36	ENSNFUG00015010331	map2k5
160.021	1.26352	0.113484	11.1339	8.58379e-29	4.58223e-27	ENSNFUG00015010191	ecel1
90.8036	1.263	0.200669	6.29394	3.09508e-10	3.0941e-09	ENSNFUG00015011252
375.475	1.2619	0.0988361	12.7676	2.48666e-37	2.27469e-35	ENSNFUG00015023225	THSD4
65.6218	1.25682	0.142538	8.81744	1.17103e-18	2.93833e-17	ENSNFUG00015024801	pgbd5
51.0585	1.25437	0.328312	3.82066	0.000133097	0.000505457	ENSNFUG00015008328	colec12
52.183	1.25039	0.266916	4.6846	2.80511e-06	1.48066e-05	ENSNFUG00015014492	si:dkey-266j7.2
51.86	1.24959	0.270767	4.61502	3.93057e-06	2.02315e-05	ENSNFUG00015016558	slc4a11
159.258	1.24923	0.142799	8.7482	2.16792e-18	5.3055e-17	ENSNFUG00015016459	plxna4
95.3324	1.24804	0.202165	6.17338	6.68438e-10	6.35202e-09	ENSNFUG00015013925	RELL2
120.291	1.24625	0.1641	7.59442	3.0917e-14	5.10605e-13	ENSNFUG00015022322	ahdc1
2735.02	1.24117	0.127822	9.71009	2.73085e-22	9.2721e-21	ENSNFUG00015025113
229.789	1.23944	0.138646	8.93956	3.90728e-19	1.03266e-17	ENSNFUG00015009539	slc7a6
137.166	1.23693	0.123175	10.0421	9.95785e-24	3.80415e-22	ENSNFUG00015013398	syt16
70.0319	1.23115	0.312527	3.93935	8.17042e-05	0.000325642	ENSNFUG00015008207	dock3
147.074	1.22686	0.179048	6.85214	7.27524e-12	8.99414e-11	ENSNFUG00015003552
83.8465	1.22577	0.159106	7.70415	1.31719e-14	2.26284e-13	ENSNFUG00015001750	mttp
77.1276	1.22538	0.392865	3.1191	0.00181404	0.00526796	ENSNFUG00015020774	trim46b
138.688	1.22485	0.187674	6.52645	6.73488e-11	7.40012e-10	ENSNFUG00015025279	col24a1
267.915	1.22176	0.16311	7.49041	6.86591e-14	1.08815e-12	ENSNFUG00015003283	cfap184
99.6629	1.21591	0.208155	5.84138	5.17706e-09	4.36885e-08	ENSNFUG00015007252
77.6846	1.21585	0.174958	6.94936	3.66953e-12	4.6976e-11	ENSNFUG00015010698	RBM20
195.324	1.21556	0.105916	11.4767	1.72786e-30	1.05032e-28	ENSNFUG00015000259
130.166	1.21219	0.219708	5.5173	3.44252e-08	2.53798e-07	ENSNFUG00015020074	NPY2R
65.3482	1.21099	0.20053	6.03893	1.55137e-09	1.41275e-08	ENSNFUG00015022757	pfkfb1
65.2552	1.20872	0.309266	3.90836	9.29238e-05	0.000365947	ENSNFUG00015004804	slc43a3a
63.2211	1.20496	0.252868	4.76517	1.88697e-06	1.0268e-05	ENSNFUG00015005356	col5a3a
272.336	1.20105	0.227387	5.28196	1.27811e-07	8.5619e-07	ENSNFUG00015022848	cxxc1a
108.756	1.20032	0.231057	5.19492	2.04804e-07	1.3235e-06	ENSNFUG00015015232	map1ab
1905.17	1.19649	0.343107	3.48722	0.000488062	0.00162263	ENSNFUG00015017670	COX6B1
55.1937	1.1964	0.337186	3.54818	0.0003879	0.00132685	ENSNFUG00015024019
336.289	1.19557	0.183112	6.5292	6.61217e-11	7.27377e-10	ENSNFUG00015022351	CLEP
161.122	1.19542	0.169937	7.03452	1.99948e-12	2.66466e-11	ENSNFUG00015015920
168.096	1.19485	0.227226	5.25841	1.45303e-07	9.62422e-07	ENSNFUG00015014194	lmtk3
1836.39	1.19316	0.155271	7.68439	1.53732e-14	2.62402e-13	ENSNFUG00015015058	cntn1b
237.805	1.192	0.202726	5.87988	4.10558e-09	3.53249e-08	ENSNFUG00015013452	ppa1a
1067.46	1.18976	0.0548054	21.7089	1.69165e-104	9.3757e-102	ENSNFUG00015014850	brd9
178.81	1.18913	0.0921388	12.9058	4.174e-38	3.97246e-36	ENSNFUG00015014129
94.4615	1.18884	0.25388	4.68269	2.83137e-06	1.49368e-05	ENSNFUG00015023074
258.067	1.18599	0.11802	10.0491	9.27217e-24	3.56581e-22	ENSNFUG00015013281	tiam1b
302.627	1.1838	0.13246	8.93708	3.99585e-19	1.05459e-17	ENSNFUG00015005755	gucy2f
222.198	1.18222	0.114841	10.2945	7.46393e-25	3.09122e-23	ENSNFUG00015009533	adam8b
348.274	1.18169	0.134751	8.76947	1.79505e-18	4.42747e-17	ENSNFUG00015009271	eif4ebp1
427.742	1.17706	0.496821	2.36917	0.0178279	0.0390185	ENSNFUG00015018516	gpnmb
215.279	1.17701	0.12272	9.59101	8.72285e-22	2.83892e-20	ENSNFUG00015022859	nedd9
529.733	1.17172	0.174783	6.70386	2.02989e-11	2.36883e-10	ENSNFUG00015018410
141.93	1.1711	0.19238	6.08744	1.14728e-09	1.05409e-08	ENSNFUG00015014150	hey1
210.476	1.16689	0.104008	11.2192	3.28306e-29	1.81493e-27	ENSNFUG00015004933	pnpla2
94.819	1.16591	0.144726	8.056	7.88303e-16	1.53936e-14	ENSNFUG00015010450	ephb3a
52.2603	1.16535	0.256964	4.53505	5.75894e-06	2.87779e-05	ENSNFUG00015010164	dlgap1a
411.552	1.16417	0.274166	4.24622	2.17402e-05	9.701e-05	ENSNFUG00015020157	csrnp1b
135.268	1.16334	0.180177	6.45666	1.07036e-10	1.14732e-09	ENSNFUG00015022282	matn1
1507.96	1.16277	0.0538245	21.6029	1.68626e-103	8.82662e-101	ENSNFUG00015016902
398.917	1.15949	0.170529	6.79938	1.05071e-11	1.27657e-10	ENSNFUG00015015779
72.9348	1.15592	0.254935	4.53419	5.78249e-06	2.88803e-05	ENSNFUG00015023703
217.468	1.1529	0.101969	11.3063	1.22099e-29	6.93021e-28	ENSNFUG00015017202	cacna1eb
50.9739	1.15285	0.2491	4.62807	3.69093e-06	1.90501e-05	ENSNFUG00015018369
50.2314	1.15285	0.272912	4.22426	2.39731e-05	0.000106269	ENSNFUG00015014334	rpe65b
5096.87	1.15181	0.100459	11.4655	1.96592e-30	1.17606e-28	ENSNFUG00015020792	wwc1
74.3237	1.15124	0.245903	4.68167	2.84544e-06	1.50068e-05	ENSNFUG00015001104	lpin1a
87.2633	1.1475	0.154649	7.42002	1.17101e-13	1.79695e-12	ENSNFUG00015000706	pcdh2aa1
174.215	1.14523	0.217114	5.27478	1.32914e-07	8.89116e-07	ENSNFUG00015015135	smtnl
226.35	1.14409	0.175871	6.50531	7.75348e-11	8.46994e-10	ENSNFUG00015024497
3156.46	1.14391	0.168505	6.78855	1.13269e-11	1.36999e-10	ENSNFUG00015009521	C23H1ORF192
69.4222	1.1399	0.228719	4.98384	6.23331e-07	3.72535e-06	ENSNFUG00015020689	mturn
146.375	1.13976	0.17864	6.38019	1.76866e-10	1.83077e-09	ENSNFUG00015016677	dhrs12la
802.222	1.1361	0.110301	10.3	7.04479e-25	2.92405e-23	ENSNFUG00015015168	dnph1
58.4353	1.13033	0.141624	7.98119	1.44933e-15	2.77271e-14	ENSNFUG00015010257
365.573	1.12907	0.0975363	11.5759	5.45974e-31	3.45246e-29	ENSNFUG00015009955	eaf1
368.749	1.12763	0.18274	6.17069	6.79916e-10	6.45783e-09	ENSNFUG00015020688	arrdc1a
91.7748	1.12754	0.160679	7.01737	2.26088e-12	2.98347e-11	ENSNFUG00015001502
82.9794	1.12677	0.22196	5.07645	3.8456e-07	2.36973e-06	ENSNFUG00015015886
284.673	1.12407	0.150048	7.49139	6.8147e-14	1.0821e-12	ENSNFUG00015011907	brms1
143.892	1.12186	0.180292	6.22245	4.89443e-10	4.74681e-09	ENSNFUG00015015508
141.543	1.12025	0.142506	7.86105	3.80919e-15	6.9286e-14	ENSNFUG00015016604	PPEF2
296.121	1.11728	0.258449	4.323	1.53922e-05	7.0865e-05	ENSNFUG00015009250	lmo7b
4391.86	1.1172	0.0826172	13.5226	1.15081e-41	1.30638e-39	ENSNFUG00015001740	ect2l
1847.5	1.11679	0.131486	8.49362	2.00299e-17	4.47209e-16	ENSNFUG00015015079	rassf2a
66.2302	1.11665	0.191265	5.83823	5.27574e-09	4.44218e-08	ENSNFUG00015003079	rnd2
621.314	1.11528	0.237629	4.69336	2.68754e-06	1.42218e-05	ENSNFUG00015004968
1151.07	1.11394	0.23307	4.77942	1.75804e-06	9.6444e-06	ENSNFUG00015000233
64.8177	1.11378	0.177851	6.26245	3.7898e-10	3.72147e-09	ENSNFUG00015020762	sinhcaf
73.6883	1.11212	0.15994	6.95333	3.56756e-12	4.57327e-11	ENSNFUG00015015266	glis1b
319.144	1.11116	0.288842	3.84696	0.000119594	0.000458988	ENSNFUG00015000838
322.381	1.11079	0.148778	7.46609	8.26155e-14	1.29734e-12	ENSNFUG00015014434
123.849	1.10884	0.133477	8.30733	9.78824e-17	2.06319e-15	ENSNFUG00015004982	gtf2f2b
78.7371	1.10715	0.187337	5.90994	3.42242e-09	2.9816e-08	ENSNFUG00015005998	si:ch211-156b7.4
604.445	1.10576	0.088154	12.5435	4.31744e-36	3.78409e-34	ENSNFUG00015016957	smpd5
113.506	1.10453	0.209524	5.2716	1.3524e-07	9.0339e-07	ENSNFUG00015009624
98.5395	1.1045	0.209974	5.26018	1.43914e-07	9.54898e-07	ENSNFUG00015009394	lpar6a
58.952	1.10276	0.245964	4.48344	7.34486e-06	3.60569e-05	ENSNFUG00015013663	abcc12
63.9751	1.09969	0.193691	5.67751	1.36666e-08	1.07171e-07	ENSNFUG00015019345	si:dkey-190g11.3
230.144	1.09842	0.130633	8.40839	4.15681e-17	9.04514e-16	ENSNFUG00015013014	mppe1
153.133	1.09688	0.107634	10.1908	2.1801e-24	8.68536e-23	ENSNFUG00015015196	ap5s1
4865.26	1.09658	0.121959	8.99133	2.44254e-19	6.62262e-18	ENSNFUG00015005728	mthfr
71.9638	1.09498	0.190937	5.73475	9.76573e-09	7.86769e-08	ENSNFUG00015017533	nfil3-6
147.824	1.09388	0.26559	4.11868	3.81042e-05	0.000162877	ENSNFUG00015007990	acbd5b
284.058	1.09343	0.113573	9.62752	6.11883e-22	2.01579e-20	ENSNFUG00015022436
1617.09	1.09334	0.174854	6.25285	4.03036e-10	3.94536e-09	ENSNFUG00015002009	YBX2
406.181	1.09263	0.222491	4.9109	9.06584e-07	5.26137e-06	ENSNFUG00015024403
75.4528	1.09129	0.448339	2.43407	0.0149301	0.0334056	ENSNFUG00015000928
1367.56	1.09127	0.0597395	18.2671	1.51148e-74	4.66922e-72	ENSNFUG00015002618	nadk2
53.852	1.09053	0.384972	2.83277	0.00461472	0.0120293	ENSNFUG00015020365	prr5a
146.65	1.08925	0.171012	6.36943	1.89737e-10	1.95058e-09	ENSNFUG00015000374
173.062	1.08889	0.250408	4.34846	1.37097e-05	6.38207e-05	ENSNFUG00015013424	Nfu_g_1_013830
107.767	1.0867	0.225188	4.82575	1.39476e-06	7.80602e-06	ENSNFUG00015019412
182.205	1.08655	0.114478	9.49133	2.28095e-21	7.22391e-20	ENSNFUG00015009812
97.4411	1.08645	0.19684	5.51947	3.40018e-08	2.50971e-07	ENSNFUG00015017915
83.7243	1.08421	0.191284	5.66808	1.44407e-08	1.12726e-07	ENSNFUG00015021212
508.504	1.08329	0.141941	7.63195	2.31225e-14	3.86277e-13	ENSNFUG00015011229
217.547	1.083	0.0928659	11.662	1.99342e-31	1.29531e-29	ENSNFUG00015019899	cpsf3
111.115	1.08255	0.189595	5.70981	1.13099e-08	9.02687e-08	ENSNFUG00015016255
219.754	1.08253	0.297223	3.64214	0.000270386	0.000960624	ENSNFUG00015019161
93.1203	1.08197	0.15847	6.82757	8.63621e-12	1.05886e-10	ENSNFUG00015006645	nr1i2
212.85	1.08193	0.145313	7.44552	9.65617e-14	1.50381e-12	ENSNFUG00015023993	sall4
121.079	1.08159	0.141165	7.66191	1.83184e-14	3.10424e-13	ENSNFUG00015010459	plbd1a
456.68	1.08135	0.201662	5.36218	8.22236e-08	5.68595e-07	ENSNFUG00015022043
113.331	1.08111	0.228287	4.73577	2.1823e-06	1.17562e-05	ENSNFUG00015010465
64.3675	1.08076	0.151864	7.11664	1.10588e-12	1.51227e-11	ENSNFUG00015020210	dntt
153.608	1.07686	0.153432	7.01848	2.243e-12	2.96403e-11	ENSNFUG00015014158
421.741	1.07639	0.0724582	14.8554	6.42133e-50	1.00836e-47	ENSNFUG00015008325	map2k1
566.22	1.07604	0.335773	3.20466	0.00135221	0.00404588	ENSNFUG00015024401	alas2
4723.85	1.07443	0.12185	8.81764	1.16898e-18	2.93711e-17	ENSNFUG00015020306	tuba1a
103.516	1.07369	0.140053	7.66628	1.77055e-14	3.00579e-13	ENSNFUG00015015844
84.8437	1.0667	0.295868	3.60532	0.000311766	0.00108956	ENSNFUG00015016563	loxa
127.097	1.06613	0.325051	3.27988	0.00103851	0.00320762	ENSNFUG00015011280	nos1
512.705	1.06469	0.463443	2.29736	0.0215985	0.0460462	ENSNFUG00015009718
91.8364	1.0639	0.149355	7.1233	1.05373e-12	1.44306e-11	ENSNFUG00015000699
244.453	1.06232	0.0914576	11.6155	3.43819e-31	2.18883e-29	ENSNFUG00015017331	GADL1
1295.45	1.06129	0.204739	5.18362	2.17618e-07	1.39911e-06	ENSNFUG00015001971	zgc:162730
119.127	1.05963	0.179275	5.91064	3.40786e-09	2.97167e-08	ENSNFUG00015010640	sema3c
104.919	1.05823	0.165412	6.39752	1.57924e-10	1.64656e-09	ENSNFUG00015016554	inka1a
727.404	1.05788	0.162663	6.50351	7.84693e-11	8.56211e-10	ENSNFUG00015002350
1237.17	1.05784	0.097478	10.8521	1.94859e-27	9.43941e-26	ENSNFUG00015005445
209.449	1.0576	0.141571	7.47045	7.99187e-14	1.25814e-12	ENSNFUG00015004967	tln2b
163.646	1.0576	0.130092	8.12964	4.30575e-16	8.59509e-15	ENSNFUG00015014610
124.089	1.05604	0.121299	8.70608	3.14556e-18	7.58963e-17	ENSNFUG00015019695	celf3a
317.068	1.05539	0.182881	5.77095	7.88271e-09	6.44992e-08	ENSNFUG00015020967	pou2f2a
78.0084	1.05276	0.188825	5.5753	2.47098e-08	1.86334e-07	ENSNFUG00015000372
120.017	1.05264	0.262986	4.00265	6.26361e-05	0.00025659	ENSNFUG00015014242	slc44a5b
63.219	1.0523	0.188584	5.58002	2.40496e-08	1.81858e-07	ENSNFUG00015001669
237.995	1.05176	0.186527	5.63867	1.71366e-08	1.324e-07	ENSNFUG00015000983	OLA.5669
1837.04	1.05109	0.0713965	14.7218	4.66851e-49	6.92704e-47	ENSNFUG00015014788	rab6ba
270.582	1.05088	0.132202	7.94901	1.88006e-15	3.53924e-14	ENSNFUG00015018833
150.487	1.04792	0.117024	8.95473	3.40571e-19	9.11608e-18	ENSNFUG00015014802	iah1
205.327	1.04659	0.152239	6.87468	6.21281e-12	7.743e-11	ENSNFUG00015011421
1364.07	1.04593	0.11248	9.29884	1.41983e-20	4.26718e-19	ENSNFUG00015012994	angel1
64.6025	1.04197	0.17779	5.86071	4.60884e-09	3.92095e-08	ENSNFUG00015019719	tecra
993.624	1.0419	0.117194	8.89041	6.08844e-19	1.57165e-17	ENSNFUG00015002990
333.509	1.03875	0.179188	5.79696	6.75285e-09	5.58117e-08	ENSNFUG00015008375
101.07	1.03811	0.262511	3.95453	7.6686e-05	0.000307789	ENSNFUG00015014637
60.9108	1.03764	0.290526	3.5716	0.000354809	0.00122455	ENSNFUG00015001569	C1QL2
9304.97	1.0367	0.192447	5.38696	7.16598e-08	5.00887e-07	ENSNFUG00015000694	krt95
126.731	1.03569	0.128255	8.07524	6.73415e-16	1.32186e-14	ENSNFUG00015015797
52.6435	1.0343	0.181505	5.69846	1.20895e-08	9.58813e-08	ENSNFUG00015002143	itga6l
96.1845	1.03253	0.187836	5.49698	3.86341e-08	2.82345e-07	ENSNFUG00015005390
146.998	1.03138	0.133143	7.74642	9.45224e-15	1.64619e-13	ENSNFUG00015007546	gbp
110.38	1.02765	0.106458	9.6531	4.76912e-22	1.5878e-20	ENSNFUG00015012899	gprc5bb
132.441	1.02507	0.112348	9.12406	7.23617e-20	2.05359e-18	ENSNFUG00015018085	ppm1h
161.444	1.02483	0.221546	4.6258	3.73163e-06	1.92496e-05	ENSNFUG00015018700	pkmb
155.123	1.02302	0.18558	5.51256	3.53648e-08	2.60115e-07	ENSNFUG00015008061	phldb1a
205.829	1.02125	0.135021	7.56366	3.91896e-14	6.38831e-13	ENSNFUG00015023809
111.835	1.02058	0.152422	6.69579	2.14505e-11	2.4936e-10	ENSNFUG00015018757	hyal1
225.88	1.02058	0.114616	8.90436	5.36952e-19	1.39949e-17	ENSNFUG00015007484	prex2
296.278	1.02	0.280953	3.63049	0.000282885	0.00100088	ENSNFUG00015023775	CXCR4
126.803	1.01935	0.211996	4.80836	1.52176e-06	8.45152e-06	ENSNFUG00015020685	sh3bp5a
4022.95	1.0192	0.115059	8.85806	8.14192e-19	2.07614e-17	ENSNFUG00015023839	prpf40a
54.3851	1.01882	0.350304	2.90838	0.00363302	0.00974112	ENSNFUG00015015668	arvcfa
141.907	1.01803	0.233087	4.36758	1.2563e-05	5.8919e-05	ENSNFUG00015010510	CYP2J2
314.757	1.0174	0.211942	4.80035	1.58387e-06	8.77577e-06	ENSNFUG00015008477
473.718	1.0168	0.119264	8.52564	1.51968e-17	3.45022e-16	ENSNFUG00015012919	dcxr
119.278	1.01656	0.289351	3.51324	0.000442681	0.00149042	ENSNFUG00015023686	mmp19
160.762	1.01649	0.132314	7.68238	1.56156e-14	2.65818e-13	ENSNFUG00015006636
112.234	1.01583	0.2944	3.45051	0.000559531	0.00183946	ENSNFUG00015009511
75.3254	1.01482	0.232297	4.36861	1.25038e-05	5.86852e-05	ENSNFUG00015000758	NXPE3
91.4072	1.01437	0.157122	6.4559	1.07576e-10	1.15049e-09	ENSNFUG00015016790	rundc3b
83.8555	1.01429	0.185242	5.4755	4.3629e-08	3.1548e-07	ENSNFUG00015008255	rfesd
370.142	1.01385	0.159143	6.37066	1.88211e-10	1.94124e-09	ENSNFUG00015017081
60.0264	1.01295	0.189384	5.34867	8.86044e-08	6.08847e-07	ENSNFUG00015014186	tnr
290.093	1.01168	0.0726319	13.9289	4.22791e-44	5.34703e-42	ENSNFUG00015013829	ptdss1a
62.7086	1.01131	0.177905	5.68455	1.31158e-08	1.03325e-07	ENSNFUG00015024204
200.513	1.00832	0.101839	9.90109	4.11743e-23	1.4807e-21	ENSNFUG00015007501
149.55	1.00711	0.102911	9.78623	1.29019e-22	4.44468e-21	ENSNFUG00015024761
535.479	1.00456	0.13646	7.36157	1.8176e-13	2.71186e-12	ENSNFUG00015000062	proza
106.921	1.00382	0.122225	8.21288	2.15946e-16	4.40877e-15	ENSNFUG00015004811	tmem30b
315.085	1.00109	0.108211	9.25129	2.21803e-20	6.53072e-19	ENSNFUG00015000195	nkx6.2
114.158	1.00016	0.151974	6.58115	4.66818e-11	5.23303e-10	ENSNFUG00015006580
127.838	1.00015	0.105241	9.50346	2.03021e-21	6.46238e-20	ENSNFUG00015018870	marveld3
74.7299	-1.00199	0.168244	-5.95557	2.59172e-09	2.29611e-08	ENSNFUG00015012852	tmem108
676.642	-1.00267	0.404626	-2.47803	0.0132112	0.0301066	ENSNFUG00015014913	itgb2
60.9922	-1.00398	0.21401	-4.6913	2.71474e-06	1.43577e-05	ENSNFUG00015005526	ABCC2
321.263	-1.00443	0.270764	-3.70962	0.000207572	0.000754385	ENSNFUG00015019346	pik3ip1
370.725	-1.00564	0.131476	-7.6488	2.02871e-14	3.41636e-13	ENSNFUG00015016377	igsf8
70.818	-1.00586	0.210115	-4.7872	1.69125e-06	9.31325e-06	ENSNFUG00015002910	PLXDC1
249.66	-1.0077	0.397314	-2.53629	0.0112035	0.0259999	ENSNFUG00015022871	NRCAM
798.048	-1.00861	0.221385	-4.55592	5.21562e-06	2.62719e-05	ENSNFUG00015001227	ogal
619.219	-1.00912	0.143605	-7.02702	2.10984e-12	2.79591e-11	ENSNFUG00015001446	bcam
193.346	-1.01073	0.311294	-3.24687	0.00116683	0.00355387	ENSNFUG00015019862	adcy6a
1208.7	-1.01092	0.125946	-8.02658	1.00229e-15	1.94513e-14	ENSNFUG00015007259	pik3c2a
76.4542	-1.01114	0.198865	-5.08458	3.68434e-07	2.27931e-06	ENSNFUG00015009745	brinp3a.2
114.298	-1.01162	0.146776	-6.89227	5.4908e-12	6.88414e-11	ENSNFUG00015018583	marchf8
199.913	-1.01276	0.190747	-5.30943	1.09968e-07	7.45143e-07	ENSNFUG00015004405	anks1b
575.994	-1.01357	0.19352	-5.23757	1.62702e-07	1.0679e-06	ENSNFUG00015003146
631.799	-1.01383	0.145988	-6.94459	3.79551e-12	4.84898e-11	ENSNFUG00015022873	apol1
304.599	-1.01554	0.195549	-5.19328	2.06623e-07	1.33434e-06	ENSNFUG00015007875	IL2RGA
64.436	-1.01846	0.235045	-4.33302	1.47076e-05	6.79789e-05	ENSNFUG00015020442	shisa9a
53.672	-1.01864	0.336402	-3.02804	0.00246146	0.00690955	ENSNFUG00015002179
547.535	-1.01972	0.136821	-7.45293	9.12873e-14	1.42638e-12	ENSNFUG00015024240	slc35e3
145.084	-1.02062	0.256142	-3.98458	6.76e-05	0.000274656	ENSNFUG00015018827	bco1
293.285	-1.02097	0.226328	-4.51102	6.45157e-06	3.19846e-05	ENSNFUG00015004591	lhfpl2a
385.477	-1.02114	0.385105	-2.65159	0.0080113	0.0194067	ENSNFUG00015010382	Nfu_g_1_022803
118.97	-1.02509	0.184309	-5.56178	2.67038e-08	2.0056e-07	ENSNFUG00015022651	Nfu_g_1_008066
488.645	-1.02808	0.221408	-4.64336	3.42788e-06	1.78242e-05	ENSNFUG00015012246	afap1l2
471.957	-1.02886	0.0792752	-12.9783	1.62347e-38	1.56886e-36	ENSNFUG00015012265	pld6
154.379	-1.029	0.199721	-5.1522	2.57452e-07	1.63513e-06	ENSNFUG00015009257	fblim1
350.758	-1.02953	0.0934736	-11.0141	3.26771e-28	1.66875e-26	ENSNFUG00015003930	hnrpkl
1987.67	-1.02993	0.0676013	-15.2354	2.05802e-52	3.46262e-50	ENSNFUG00015015122	cs
218.806	-1.03033	0.141804	-7.26582	3.70773e-13	5.32129e-12	ENSNFUG00015006926	smpdl3a
354.57	-1.03275	0.138759	-7.44272	9.86316e-14	1.53478e-12	ENSNFUG00015001253
1977.03	-1.03556	0.0789458	-13.1174	2.61733e-39	2.65167e-37	ENSNFUG00015022768	nup37
172.871	-1.03576	0.193057	-5.36504	8.09318e-08	5.60897e-07	ENSNFUG00015014623	cyth4a
125.104	-1.03624	0.182886	-5.66604	1.46137e-08	1.13935e-07	ENSNFUG00015024893	chst15
350.579	-1.03652	0.241513	-4.29178	1.7725e-05	8.03102e-05	ENSNFUG00015006097	fbln5
676.901	-1.03663	0.0766918	-13.5169	1.24322e-41	1.40283e-39	ENSNFUG00015012586	rrp7a
865.971	-1.03712	0.177537	-5.8417	5.16719e-09	4.36248e-08	ENSNFUG00015016552	jpt1a
204.427	-1.03755	0.0962162	-10.7835	4.11828e-27	1.96468e-25	ENSNFUG00015015803	fam222ba
943.994	-1.0392	0.0880351	-11.8044	3.70592e-32	2.50303e-30	ENSNFUG00015021359	VDAC2
203.816	-1.03972	0.16327	-6.36808	1.91406e-10	1.96559e-09	ENSNFUG00015024876	ehhadh
600.244	-1.03981	0.228988	-4.54088	5.60192e-06	2.80677e-05	ENSNFUG00015021716	fdxr
1862.08	-1.04044	0.338325	-3.07526	0.00210319	0.00600673	ENSNFUG00015012075	col6a1
403.641	-1.04223	0.219665	-4.74463	2.08886e-06	1.12948e-05	ENSNFUG00015000913	spock3
1760.3	-1.04232	0.137428	-7.58453	3.33697e-14	5.48707e-13	ENSNFUG00015006440	cenpv
127.813	-1.04236	0.163338	-6.38165	1.75192e-10	1.8159e-09	ENSNFUG00015014659
66.7104	-1.04335	0.347209	-3.00495	0.00265626	0.00740232	ENSNFUG00015006590	trim55a
50.7058	-1.0435	0.296337	-3.52134	0.000429369	0.00145104	ENSNFUG00015011741	OLA.1488
357.92	-1.04403	0.269463	-3.87448	0.000106853	0.000415078	ENSNFUG00015017409
877.051	-1.04714	0.12906	-8.11361	4.91383e-16	9.78817e-15	ENSNFUG00015004839	olfml3b
349.448	-1.04898	0.10613	-9.88388	4.89043e-23	1.752e-21	ENSNFUG00015021843	SFMBT1
1444.61	-1.05124	0.404835	-2.59671	0.00941224	0.0223316	ENSNFUG00015002879	cnn1b
1786.78	-1.05396	0.285224	-3.6952	0.000219717	0.000795454	ENSNFUG00015020571
76.0706	-1.05505	0.457917	-2.30401	0.0212221	0.0453364	ENSNFUG00015013966	GNAZ
400.236	-1.05623	0.144268	-7.32126	2.45646e-13	3.5967e-12	ENSNFUG00015006073	si:dkey-184a18.5
96.1313	-1.05632	0.230752	-4.57773	4.7005e-06	2.383e-05	ENSNFUG00015014968	hspb8
76.5436	-1.05706	0.235136	-4.49552	6.94002e-06	3.4253e-05	ENSNFUG00015003834	MYOM2
205.214	-1.05829	0.107156	-9.87612	5.28367e-23	1.88571e-21	ENSNFUG00015003675	nfil3
122.593	-1.05943	0.13368	-7.92514	2.27882e-15	4.25168e-14	ENSNFUG00015002454	cacna1ab
85.4511	-1.05965	0.162385	-6.52555	6.77517e-11	7.43572e-10	ENSNFUG00015016062	slc52a2
636.873	-1.05968	0.272296	-3.89164	9.957e-05	0.000388789	ENSNFUG00015025418
86.6125	-1.06271	0.200681	-5.29551	1.18686e-07	7.99328e-07	ENSNFUG00015020001	mdfi
178.524	-1.06275	0.200296	-5.30592	1.12104e-07	7.57438e-07	ENSNFUG00015009305
5476.27	-1.06423	0.121999	-8.72324	2.7036e-18	6.54841e-17	ENSNFUG00015022712
194.825	-1.06434	0.0987701	-10.7759	4.4725e-27	2.12828e-25	ENSNFUG00015010202	FAM222A
837.587	-1.06485	0.125419	-8.49039	2.05941e-17	4.59261e-16	ENSNFUG00015006117
417.393	-1.06547	0.205141	-5.19382	2.06025e-07	1.33093e-06	ENSNFUG00015023248	IGFBP3
75.6019	-1.0658	0.220409	-4.83557	1.32764e-06	7.45251e-06	ENSNFUG00015007208	slc38a3b
189.084	-1.06972	0.21909	-4.88254	1.04727e-06	5.98388e-06	ENSNFUG00015019462	sgcg
288.847	-1.06979	0.134223	-7.97026	1.58337e-15	3.00777e-14	ENSNFUG00015018030	slc5a6a
277.866	-1.07032	0.128133	-8.35321	6.64347e-17	1.41778e-15	ENSNFUG00015018347	dglucy
295.145	-1.0707	0.148862	-7.19261	6.35658e-13	8.88601e-12	ENSNFUG00015016166	TLR3
1372.95	-1.07298	0.121789	-8.81018	1.24946e-18	3.13097e-17	ENSNFUG00015014159
166.414	-1.07891	0.207498	-5.19962	1.99699e-07	1.29317e-06	ENSNFUG00015005218	ednrba
425.844	-1.08247	0.124832	-8.67141	4.26801e-18	1.01548e-16	ENSNFUG00015001115	cmasa
85.958	-1.08259	0.257049	-4.2116	2.53566e-05	0.000112033	ENSNFUG00015009884	ghra
339.387	-1.08321	0.0693135	-15.6276	4.72031e-55	8.55284e-53	ENSNFUG00015015391	mgat1b
77.8608	-1.08396	0.227746	-4.75951	1.94063e-06	1.05417e-05	ENSNFUG00015025348	rgs9b
79.968	-1.08428	0.169537	-6.39555	1.59966e-10	1.66449e-09	ENSNFUG00015005420
52.5215	-1.08441	0.236177	-4.59152	4.40022e-06	2.24162e-05	ENSNFUG00015022772	slc5a9
202.29	-1.086	0.329054	-3.30036	0.000965618	0.00300266	ENSNFUG00015006007
54.877	-1.08645	0.300572	-3.61459	0.000300818	0.0010564	ENSNFUG00015022657	arid5a
90.4999	-1.08683	0.182564	-5.95316	2.63017e-09	2.3269e-08	ENSNFUG00015009295
1616.4	-1.08776	0.106275	-10.2353	1.37715e-24	5.60495e-23	ENSNFUG00015025210
53.9825	-1.08983	0.209066	-5.21286	1.85948e-07	1.21036e-06	ENSNFUG00015013065	zgc:136493
587.191	-1.09004	0.0621145	-17.5489	6.06237e-69	1.56492e-66	ENSNFUG00015017158	arfip1
160.092	-1.0902	0.391329	-2.7859	0.00533797	0.0136595	ENSNFUG00015012689
211.658	-1.09171	0.304159	-3.58926	0.000331621	0.00115148	ENSNFUG00015012376
1419.38	-1.0918	0.0980329	-11.1371	8.27763e-29	4.43136e-27	ENSNFUG00015013919	hyou1
502.399	-1.09227	0.162637	-6.71598	1.86802e-11	2.19184e-10	ENSNFUG00015023393	poglut2
853.081	-1.09684	0.190931	-5.74467	9.21002e-09	7.45825e-08	ENSNFUG00015015397	pygl
92.2247	-1.09836	0.170081	-6.45787	1.06187e-10	1.13886e-09	ENSNFUG00015017861	si:ch211-272n13.7
563.455	-1.09876	0.0668298	-16.4411	9.71121e-61	2.01097e-58	ENSNFUG00015020297	gfm1
480.059	-1.10403	0.334044	-3.30505	0.000949609	0.00295922	ENSNFUG00015002376	gapdh
130.549	-1.10476	0.178609	-6.18535	6.19642e-10	5.93621e-09	ENSNFUG00015025053	CSRNP3
452.79	-1.10578	0.179204	-6.17054	6.80586e-10	6.46093e-09	ENSNFUG00015018409	tap2a
925.181	-1.10699	0.0926657	-11.946	6.80875e-33	4.86e-31	ENSNFUG00015022020	KLHDC10
147.499	-1.1078	0.101303	-10.9355	7.79629e-28	3.8969e-26	ENSNFUG00015003474	nyap2a
156.076	-1.11086	0.115756	-9.59656	8.26545e-22	2.69471e-20	ENSNFUG00015024105	ncbp2as2
499.67	-1.11204	0.0749963	-14.828	9.66291e-50	1.50486e-47	ENSNFUG00015005293	mrpl57
61.0618	-1.11315	0.231295	-4.81267	1.48927e-06	8.28821e-06	ENSNFUG00015002909	sybu
439.422	-1.11471	0.0800781	-13.9203	4.7674e-44	5.98913e-42	ENSNFUG00015008361	slc35a5
66.5292	-1.11478	0.205658	-5.42055	5.94147e-08	4.2154e-07	ENSNFUG00015015504	mapk12b
121.782	-1.11551	0.170934	-6.52597	6.75635e-11	7.41938e-10	ENSNFUG00015009509	nsun3
68.8502	-1.11599	0.263689	-4.23221	2.31402e-05	0.000102876	ENSNFUG00015024160	CHST15
208.725	-1.11695	0.187013	-5.97256	2.33555e-09	2.08485e-08	ENSNFUG00015001614	rasip1
430.274	-1.11702	0.201048	-5.55596	2.76089e-08	2.06646e-07	ENSNFUG00015014758	eno3
196.504	-1.11816	0.184205	-6.07021	1.27742e-09	1.16966e-08	ENSNFUG00015004110	si:dkey-5i3.5
3969.61	-1.11923	0.0600591	-18.6355	1.65752e-77	5.47969e-75	ENSNFUG00015016121	bckdk
53.4483	-1.11985	0.181149	-6.18193	6.33237e-10	6.05414e-09	ENSNFUG00015004164	PDE2A
220.405	-1.12239	0.313913	-3.57546	0.000349608	0.00120814	ENSNFUG00015010616	ADAP1
112.893	-1.12326	0.142439	-7.88591	3.1226e-15	5.75193e-14	ENSNFUG00015000818
131.07	-1.1247	0.131249	-8.56918	1.04225e-17	2.38642e-16	ENSNFUG00015018325	MFSD14B
59.2834	-1.12524	0.230087	-4.89048	1.00592e-06	5.76934e-06	ENSNFUG00015019386
76.2829	-1.12655	0.171158	-6.58194	4.6434e-11	5.20835e-10	ENSNFUG00015006806
104.167	-1.12723	0.173716	-6.48891	8.64607e-11	9.37976e-10	ENSNFUG00015002509	cavin1a
338.953	-1.13205	0.0771785	-14.6679	1.03424e-48	1.51079e-46	ENSNFUG00015024314
70.4401	-1.13746	0.24055	-4.72858	2.26094e-06	1.21382e-05	ENSNFUG00015017072	si:ch1073-443f11.2
82.1688	-1.1383	0.243997	-4.66523	3.08276e-06	1.61276e-05	ENSNFUG00015008452	rhobtb2a
290.468	-1.13968	0.167084	-6.821	9.04076e-12	1.10339e-10	ENSNFUG00015016452	qng1
328.485	-1.14005	0.0864398	-13.189	1.01516e-39	1.05689e-37	ENSNFUG00015020369	dcun1d2b
336.737	-1.14172	0.452105	-2.52534	0.0115587	0.0267025	ENSNFUG00015010302
80.1587	-1.14226	0.197588	-5.781	7.42576e-09	6.09721e-08	ENSNFUG00015022344
1192.05	-1.14455	0.171915	-6.65767	2.78205e-11	3.18887e-10	ENSNFUG00015003814	slc52a3-2b
71.311	-1.14558	0.267153	-4.2881	1.80207e-05	8.15146e-05	ENSNFUG00015001754	ano7
177.912	-1.14676	0.32455	-3.53339	0.000410274	0.00139402	ENSNFUG00015012955	rdh10a
57.9045	-1.149	0.219371	-5.23767	1.62616e-07	1.06771e-06	ENSNFUG00015023730	iqsec2a
85.7074	-1.14996	0.164675	-6.98319	2.88558e-12	3.77348e-11	ENSNFUG00015025126	aatkb
329.343	-1.1513	0.315903	-3.64449	0.000267925	0.000952419	ENSNFUG00015011799	lnx1
52.317	-1.15338	0.213112	-5.41211	6.22875e-08	4.40761e-07	ENSNFUG00015019446
269.07	-1.15502	0.179791	-6.42423	1.32542e-10	1.40237e-09	ENSNFUG00015000267	rbp5
138.238	-1.15519	0.157157	-7.35055	1.97387e-13	2.92879e-12	ENSNFUG00015013307	nrip2
4010.66	-1.15575	0.0782923	-14.762	2.57543e-49	3.88251e-47	ENSNFUG00015004024	inppl1a
1081.11	-1.16102	0.0877285	-13.2342	5.56912e-40	5.86282e-38	ENSNFUG00015006207	tha1
163.291	-1.16129	0.115927	-10.0174	1.27877e-23	4.80983e-22	ENSNFUG00015005614
59.7867	-1.16679	0.403955	-2.88841	0.00387198	0.0102994	ENSNFUG00015002022	si:ch211-136a13.1
100.548	-1.17056	0.187309	-6.24932	4.12244e-10	4.02921e-09	ENSNFUG00015002197
1849.32	-1.17481	0.0815887	-14.3991	5.24089e-47	7.26172e-45	ENSNFUG00015020045	kyat3.2
118.033	-1.17621	0.119412	-9.85004	6.85193e-23	2.42247e-21	ENSNFUG00015006820	nrsn1
1139.51	-1.18037	0.244949	-4.81882	1.44411e-06	8.06068e-06	ENSNFUG00015002864	CXCL12
924.635	-1.18037	0.114183	-10.3375	4.76583e-25	2.00016e-23	ENSNFUG00015001765
12729.1	-1.18124	0.125322	-9.4256	4.27645e-21	1.32324e-19	ENSNFUG00015004704	rsph9
262.895	-1.18372	0.101167	-11.7006	1.26487e-31	8.36325e-30	ENSNFUG00015007668	acp6
62.2655	-1.18406	0.169654	-6.97926	2.96744e-12	3.86712e-11	ENSNFUG00015007432	flvcr1
180.156	-1.18661	0.148798	-7.97465	1.52815e-15	2.90864e-14	ENSNFUG00015012987
262.552	-1.18666	0.263744	-4.49928	6.81849e-06	3.36973e-05	ENSNFUG00015024123	gldc
55.9405	-1.18709	0.169079	-7.02091	2.20432e-12	2.91497e-11	ENSNFUG00015020572	USP31
855.071	-1.18746	0.208475	-5.69595	1.22689e-08	9.71405e-08	ENSNFUG00015020515	itgb5
50.914	-1.19103	0.263412	-4.52154	6.13915e-06	3.05321e-05	ENSNFUG00015019171	RAB15
589.538	-1.19201	0.139289	-8.55777	1.1507e-17	2.62834e-16	ENSNFUG00015009676	tap2t
206.502	-1.19222	0.255269	-4.67044	3.00555e-06	1.57455e-05	ENSNFUG00015004211
2306.23	-1.19234	0.167972	-7.09847	1.26148e-12	1.71139e-11	ENSNFUG00015024526
2523.09	-1.19315	0.326517	-3.65416	0.000258023	0.000919825	ENSNFUG00015002311	clu
147.328	-1.19425	0.379811	-3.14433	0.00166466	0.00487738	ENSNFUG00015018847	si:dkey-183j2.10
1560.36	-1.19869	0.105271	-11.3866	4.87374e-30	2.8522e-28	ENSNFUG00015019915	psme2
237.304	-1.19933	0.126689	-9.46668	2.88876e-21	9.0443e-20	ENSNFUG00015021389	dusp12
150.912	-1.20142	0.385292	-3.11821	0.00181952	0.00528062	ENSNFUG00015003355	efemp1
830.907	-1.20556	0.0940691	-12.8157	1.33938e-37	1.24947e-35	ENSNFUG00015003651
51.6805	-1.2071	0.210067	-5.74629	9.12232e-09	7.39359e-08	ENSNFUG00015006702	tmem198ab
66.4262	-1.2084	0.314993	-3.83628	0.000124913	0.000477615	ENSNFUG00015013443	dpp6a
76.1705	-1.20998	0.209275	-5.78178	7.39127e-09	6.07154e-08	ENSNFUG00015016706	RASGRP1
97.6622	-1.21089	0.188099	-6.43753	1.21437e-10	1.28994e-09	ENSNFUG00015019710
70.8476	-1.21699	0.17033	-7.14489	9.00671e-13	1.24339e-11	ENSNFUG00015016125
206.811	-1.21772	0.341834	-3.56231	0.000367606	0.00126431	ENSNFUG00015008054	mmp28
456.039	-1.2222	0.251072	-4.86795	1.12761e-06	6.41385e-06	ENSNFUG00015014559
150.82	-1.22593	0.168793	-7.26295	3.78733e-13	5.42725e-12	ENSNFUG00015002610
142.729	-1.22707	0.2804	-4.37614	1.20798e-05	5.6908e-05	ENSNFUG00015023728	ncanb
1131.89	-1.2283	0.156574	-7.84485	4.33477e-15	7.8392e-14	ENSNFUG00015024021	cth
878.197	-1.2289	0.331656	-3.70533	0.000211115	0.000766524	ENSNFUG00015009520	cyp11c1
174	-1.234	0.143691	-8.58786	8.86029e-18	2.04361e-16	ENSNFUG00015011223	ankrd50l
287.712	-1.23592	0.20967	-5.8946	3.756e-09	3.25118e-08	ENSNFUG00015003265	lipeb
131.93	-1.23698	0.137417	-9.00165	2.22346e-19	6.06351e-18	ENSNFUG00015010296
195.409	-1.23913	0.107205	-11.5585	6.68554e-31	4.19941e-29	ENSNFUG00015019214	itih3b.1
391.904	-1.24084	0.109694	-11.3118	1.14687e-29	6.52919e-28	ENSNFUG00015006494	myo16
928.501	-1.24085	0.157357	-7.88559	3.13041e-15	5.76069e-14	ENSNFUG00015002185
355.618	-1.2469	0.106706	-11.6854	1.51452e-31	9.90957e-30	ENSNFUG00015017952	kdf1b
97.9725	-1.24773	0.251204	-4.96701	6.79928e-07	4.038e-06	ENSNFUG00015018494	kcnip3b
225.544	-1.25103	0.328463	-3.80874	0.000139677	0.000527362	ENSNFUG00015024080
846.687	-1.25213	0.525931	-2.38079	0.0172755	0.0379504	ENSNFUG00015004212	vwa11
62.8641	-1.25352	0.383341	-3.26998	0.00107554	0.00330844	ENSNFUG00015006619	il13ra2
192.438	-1.25411	0.102162	-12.2757	1.22266e-34	9.59992e-33	ENSNFUG00015002619	mettl25
1151.77	-1.25422	0.066282	-18.9225	7.44886e-80	2.55212e-77	ENSNFUG00015000651	cluha
127.382	-1.25711	0.147123	-8.54458	1.29001e-17	2.93232e-16	ENSNFUG00015007098	si:ch73-290k24.6
89.4935	-1.25914	0.285882	-4.40439	1.06083e-05	5.04807e-05	ENSNFUG00015001558	mfap5
1348.34	-1.26047	0.077229	-16.3212	6.97586e-60	1.41347e-57	ENSNFUG00015001638	matr3
83.342	-1.26048	0.372342	-3.38528	0.00071107	0.00227803	ENSNFUG00015023830	CYP19A1
184.772	-1.26116	0.338091	-3.73023	0.000191308	0.0007	ENSNFUG00015017749	ldha
156.262	-1.2651	0.277704	-4.55559	5.22387e-06	2.63064e-05	ENSNFUG00015024545	ednraa
1397.41	-1.26616	0.150836	-8.39426	4.68818e-17	1.01545e-15	ENSNFUG00015002869
991.082	-1.26708	0.0984206	-12.8741	6.29778e-38	5.96359e-36	ENSNFUG00015015533
148.853	-1.26767	0.275494	-4.60145	4.19565e-06	2.14948e-05	ENSNFUG00015002174
732.798	-1.27032	0.270363	-4.69858	2.61975e-06	1.39132e-05	ENSNFUG00015020586
231.154	-1.27039	0.283925	-4.47437	7.66375e-06	3.74911e-05	ENSNFUG00015000476
209.633	-1.27039	0.22616	-5.61723	1.94041e-08	1.48578e-07	ENSNFUG00015022970	pdlim2
633.76	-1.27191	0.118615	-10.723	7.93616e-27	3.73873e-25	ENSNFUG00015019510	zgc:136908
223.4	-1.27234	0.0918618	-13.8506	1.26099e-43	1.5633e-41	ENSNFUG00015021670	ADK
365.909	-1.27278	0.19501	-6.52674	6.72178e-11	7.39003e-10	ENSNFUG00015001691	FAM160A1
1310.95	-1.27967	0.288773	-4.4314	9.36225e-06	4.49942e-05	ENSNFUG00015008000	mrc1b
499.352	-1.28012	0.341384	-3.74981	0.000176968	0.000653239	ENSNFUG00015022109	anpepb.1
2405.89	-1.28189	0.0910731	-14.0754	5.3763e-45	7.13458e-43	ENSNFUG00015000127	slc38a2
322.941	-1.28362	0.16153	-7.94662	1.91677e-15	3.60474e-14	ENSNFUG00015016561
166.849	-1.28991	0.177103	-7.2834	3.25519e-13	4.70405e-12	ENSNFUG00015017619	slc35g1
681.925	-1.29013	0.161022	-8.01214	1.12732e-15	2.1721e-14	ENSNFUG00015004988	entpd3
1039.68	-1.29273	0.382659	-3.37829	0.000729378	0.00233193	ENSNFUG00015009007
3658.7	-1.29285	0.140931	-9.17366	4.57242e-20	1.31345e-18	ENSNFUG00015010961	si:busm1-194e12.8
55.5049	-1.29324	0.206381	-6.26629	3.69756e-10	3.63861e-09	ENSNFUG00015023631	HCN2
268.691	-1.294	0.173227	-7.46999	8.0202e-14	1.26154e-12	ENSNFUG00015005507	slc6a11b
389.068	-1.29712	0.128546	-10.0908	6.0688e-24	2.37756e-22	ENSNFUG00015017023	ptprfa
291.396	-1.29826	0.230022	-5.64409	1.66062e-08	1.28407e-07	ENSNFUG00015024646
322.892	-1.29856	0.222389	-5.83915	5.24673e-09	4.41973e-08	ENSNFUG00015006321	parp14rs1
116.986	-1.30028	0.229971	-5.6541	1.56666e-08	1.21741e-07	ENSNFUG00015019701	mmrn2
629.801	-1.30133	0.185079	-7.03121	2.04746e-12	2.71898e-11	ENSNFUG00015009964	gabrb2a
183.727	-1.30196	0.15969	-8.153	3.54993e-16	7.13926e-15	ENSNFUG00015008772	aspa
2337.68	-1.30234	0.0789717	-16.4912	4.24483e-61	8.9876e-59	ENSNFUG00015014646
232.4	-1.30679	0.212951	-6.13659	8.43141e-10	7.90455e-09	ENSNFUG00015010436	il12rb2
233.274	-1.3099	0.292908	-4.47206	7.74704e-06	3.78494e-05	ENSNFUG00015014600	myo1ea
1371.9	-1.31041	0.151302	-8.66088	4.68137e-18	1.10963e-16	ENSNFUG00015017907
462.886	-1.31146	0.144719	-9.06213	1.27923e-19	3.57124e-18	ENSNFUG00015003632	si:dkey-6i22.5
271.539	-1.31384	0.126832	-10.3589	3.81513e-25	1.61193e-23	ENSNFUG00015024735	slc41a3
61.0336	-1.31384	0.173733	-7.56238	3.95755e-14	6.44564e-13	ENSNFUG00015021785	parvb
66.2101	-1.31515	0.258333	-5.09091	3.56347e-07	2.21034e-06	ENSNFUG00015000465	proca1
136.396	-1.32493	0.120404	-11.0041	3.65216e-28	1.85004e-26	ENSNFUG00015022547	si:dkey-28n18.9
251.707	-1.32634	0.0972051	-13.6448	2.16824e-42	2.52211e-40	ENSNFUG00015001808
2039.92	-1.32779	0.144136	-9.21209	3.19841e-20	9.28672e-19	ENSNFUG00015014672	ttll7
285.167	-1.32868	0.217043	-6.12174	9.25603e-10	8.63468e-09	ENSNFUG00015005178	ctnnd2b
374.833	-1.33012	0.351101	-3.78842	0.00015161	0.00056764	ENSNFUG00015017198	CCL-C5A
293.575	-1.33229	0.465058	-2.86478	0.00417302	0.0109858	ENSNFUG00015015241	CDH6
259.809	-1.3417	0.108551	-12.36	4.30017e-35	3.52315e-33	ENSNFUG00015015923	cax2
79.4615	-1.34275	0.258471	-5.195	2.04725e-07	1.32345e-06	ENSNFUG00015012494	hsd17b12a
485.981	-1.34685	0.119572	-11.2639	1.97809e-29	1.10938e-27	ENSNFUG00015001231	cerk
153.035	-1.34922	0.105207	-12.8244	1.19759e-37	1.12276e-35	ENSNFUG00015015374	TBCEL
479.532	-1.35146	0.137782	-9.8087	1.03287e-22	3.6014e-21	ENSNFUG00015010645	ccnd1
393.708	-1.35194	0.429287	-3.14926	0.00163684	0.00480447	ENSNFUG00015016322	flnca
74.3133	-1.35401	0.268566	-5.04161	4.6162e-07	2.81787e-06	ENSNFUG00015013505	gstt1a
212.679	-1.35463	0.160689	-8.43011	3.45337e-17	7.57571e-16	ENSNFUG00015014107
406.132	-1.36258	0.0876948	-15.5378	1.92525e-54	3.35921e-52	ENSNFUG00015010467	entpd5b
147.537	-1.36345	0.219502	-6.21155	5.24646e-10	5.07256e-09	ENSNFUG00015006714	htr2cl1
411.993	-1.36551	0.376904	-3.62297	0.000291236	0.00102638	ENSNFUG00015018539	nherf4b
206.499	-1.369	0.276076	-4.95878	7.09372e-07	4.19699e-06	ENSNFUG00015015947	slc48a1b
153.43	-1.37213	0.291117	-4.71334	2.43691e-06	1.30199e-05	ENSNFUG00015020608	ccdc85al
57.8974	-1.37679	0.406119	-3.39013	0.000698595	0.00224303	ENSNFUG00015007477	tgfb5
1118.99	-1.37699	0.350499	-3.92867	8.54168e-05	0.000339291	ENSNFUG00015008181	COL6A6
58.6927	-1.38643	0.298624	-4.64273	3.43832e-06	1.78698e-05	ENSNFUG00015015885	grip2b
108.869	-1.38688	0.175142	-7.91863	2.40136e-15	4.47589e-14	ENSNFUG00015017939
433.506	-1.38841	0.104804	-13.2477	4.64979e-40	4.92251e-38	ENSNFUG00015005459	parp12a
64.3241	-1.39657	0.269119	-5.18943	2.10937e-07	1.35987e-06	ENSNFUG00015004475	asb15b
711.614	-1.39788	0.322305	-4.33713	1.44356e-05	6.69021e-05	ENSNFUG00015010565	col4a5
107.189	-1.39868	0.206931	-6.75916	1.38794e-11	1.65849e-10	ENSNFUG00015018861	si:ch73-52e5.2
80.2373	-1.39937	0.261869	-5.34377	9.10306e-08	6.24911e-07	ENSNFUG00015019483	tlr18
689.595	-1.40194	0.123811	-11.3232	1.00688e-29	5.74958e-28	ENSNFUG00015021310	mpc2b
182.181	-1.40278	0.493534	-2.84231	0.00447873	0.0117072	ENSNFUG00015004637
1535.38	-1.40676	0.127525	-11.0313	2.6999e-28	1.39389e-26	ENSNFUG00015005077	mov10a
1169.38	-1.41019	0.0885615	-15.9232	4.37236e-57	8.23928e-55	ENSNFUG00015024554	grb7
50.521	-1.41151	0.210711	-6.69877	2.10186e-11	2.44642e-10	ENSNFUG00015016503	acad11
58.0762	-1.41189	0.159796	-8.83557	9.95882e-19	2.52917e-17	ENSNFUG00015015752
50.711	-1.42241	0.181662	-7.82996	4.88033e-15	8.79207e-14	ENSNFUG00015017040	klhl14
345.861	-1.42599	0.154246	-9.24493	2.35396e-20	6.92012e-19	ENSNFUG00015012413	ptn
65.246	-1.42938	0.36197	-3.94888	7.85161e-05	0.000314198	ENSNFUG00015003475
321.991	-1.4313	0.597673	-2.39479	0.01663	0.0367208	ENSNFUG00015012500
104.849	-1.43675	0.18005	-7.97973	1.46657e-15	2.80284e-14	ENSNFUG00015016218
1582.16	-1.44189	0.10483	-13.7545	4.7829e-43	5.7407e-41	ENSNFUG00015024148	oat
285.4	-1.44444	0.141496	-10.2083	1.81939e-24	7.35723e-23	ENSNFUG00015000157	IGSF9B
613.014	-1.44991	0.135137	-10.7291	7.42819e-27	3.50819e-25	ENSNFUG00015006982
213.019	-1.46098	0.351479	-4.15667	3.22915e-05	0.000139821	ENSNFUG00015009326	osr2
822.545	-1.46337	0.0668438	-21.8923	3.07442e-106	1.81045e-103	ENSNFUG00015021370	Nfu_g_1_013066
304.892	-1.4681	0.52152	-2.81505	0.00487698	0.0126187	ENSNFUG00015015326	olmf4l1
619.635	-1.47068	0.0843284	-17.4399	4.10669e-68	1.03182e-65	ENSNFUG00015000352	slc38a4
51.7904	-1.47954	0.475331	-3.11265	0.00185417	0.00536712	ENSNFUG00015018130	si:ch211-236l14.4
2461.39	-1.48028	0.159649	-9.27204	1.82627e-20	5.44528e-19	ENSNFUG00015012930	slc25a55a
250.205	-1.48414	0.140309	-10.5777	3.783e-26	1.6973e-24	ENSNFUG00015003636	tmx2a
54.6078	-1.49308	0.366045	-4.07896	4.52367e-05	0.000190149	ENSNFUG00015000234	c1r
111.352	-1.5055	0.173224	-8.69106	3.59059e-18	8.60828e-17	ENSNFUG00015014100	pdlim5a
331.443	-1.50977	0.273128	-5.5277	3.24458e-08	2.40239e-07	ENSNFUG00015002769	slc7a9
59.426	-1.51327	0.466864	-3.24135	0.00118963	0.00361164	ENSNFUG00015017149	MAP7
152.895	-1.5187	0.482674	-3.14642	0.00165282	0.00484985	ENSNFUG00015023104	lygl1
267.717	-1.51922	0.25301	-6.00457	1.91838e-09	1.73215e-08	ENSNFUG00015020063	ccl25b
234.008	-1.52222	0.164375	-9.26066	2.0317e-20	6.01971e-19	ENSNFUG00015018959	cyp24a1
157.585	-1.52738	0.130117	-11.7385	8.08919e-32	5.42465e-30	ENSNFUG00015005312	zbtb3
65.6307	-1.52913	0.417763	-3.66027	0.000251953	0.000900398	ENSNFUG00015019007	mast1a
108.373	-1.5335	0.372336	-4.1186	3.81177e-05	0.000162877	ENSNFUG00015003442	dcc
261.395	-1.53505	0.32623	-4.70543	2.53332e-06	1.34663e-05	ENSNFUG00015012843	cdo1
3660.04	-1.53714	0.18847	-8.15589	3.4662e-16	6.98578e-15	ENSNFUG00015016626	c4b
303.343	-1.53882	0.229862	-6.69454	2.16345e-11	2.5119e-10	ENSNFUG00015000580
114.423	-1.54748	0.184342	-8.3946	4.67475e-17	1.01371e-15	ENSNFUG00015012669
766.294	-1.55306	0.158418	-9.80355	1.08699e-22	3.76532e-21	ENSNFUG00015004725	zgc:172121
53.1894	-1.55502	0.345347	-4.50278	6.70687e-06	3.31805e-05	ENSNFUG00015020725	PARD3
672.097	-1.55548	0.266209	-5.84307	5.12478e-09	4.32861e-08	ENSNFUG00015002822
158.635	-1.55608	0.30853	-5.04352	4.57033e-07	2.79168e-06	ENSNFUG00015013991	anpepa
76.6195	-1.5588	0.210623	-7.40089	1.35271e-13	2.05568e-12	ENSNFUG00015007254	mthfs
208.049	-1.56026	0.449894	-3.46807	0.000524219	0.00173305	ENSNFUG00015021948
179.792	-1.56071	0.258765	-6.03137	1.62577e-09	1.47715e-08	ENSNFUG00015014286	Nfu_g_1_012085
63.9443	-1.56161	0.228317	-6.83968	7.93725e-12	9.77579e-11	ENSNFUG00015024418	cd8b
68.5904	-1.56698	0.544007	-2.88044	0.00397119	0.0105265	ENSNFUG00015017892	mgll
3158.34	-1.57075	0.162956	-9.63907	5.4681e-22	1.8141e-20	ENSNFUG00015016116	dnah12
474.861	-1.58269	0.229151	-6.90674	4.9592e-12	6.24673e-11	ENSNFUG00015014254	SLC6A6
522.241	-1.58291	0.0869939	-18.1956	5.59285e-74	1.69987e-71	ENSNFUG00015009119	aco2
57.1322	-1.58339	0.239987	-6.59782	4.17258e-11	4.70827e-10	ENSNFUG00015013866	LRRN2
55.2358	-1.58949	0.284491	-5.58713	2.30854e-08	1.74848e-07	ENSNFUG00015024175	ttc39a
547.823	-1.5926	0.133746	-11.9077	1.07905e-32	7.55899e-31	ENSNFUG00015018968	A3GALT2
70.5915	-1.59508	0.295307	-5.40143	6.61108e-08	4.66065e-07	ENSNFUG00015009546	EGFR
792.12	-1.59555	0.127807	-12.4841	9.11772e-36	7.7744e-34	ENSNFUG00015013627	GOLPH3
836.033	-1.60133	0.0643478	-24.8856	1.06636e-136	1.00472e-133	ENSNFUG00015022941
487.768	-1.6037	0.119901	-13.3752	8.4471e-41	9.09583e-39	ENSNFUG00015009845
71.3689	-1.60481	0.245611	-6.53396	6.40534e-11	7.06687e-10	ENSNFUG00015002134	Nfu_g_1_009551
172.026	-1.60694	0.21094	-7.61799	2.57664e-14	4.28924e-13	ENSNFUG00015009104	gpc1b
117.861	-1.61228	0.227483	-7.08748	1.36576e-12	1.84755e-11	ENSNFUG00015000145	SLC6A20
61.124	-1.61658	0.29733	-5.43699	5.41878e-08	3.86932e-07	ENSNFUG00015023893
113.486	-1.62649	0.332305	-4.89458	9.85178e-07	5.65987e-06	ENSNFUG00015010443	ndel1a
541.987	-1.62653	0.102931	-15.8021	3.01067e-56	5.50807e-54	ENSNFUG00015007870	ephx4
1110.91	-1.63553	0.139679	-11.7092	1.14405e-31	7.61784e-30	ENSNFUG00015003197	nqo1
207.718	-1.63762	0.130824	-12.5178	5.97028e-36	5.18451e-34	ENSNFUG00015014858	slc5a10
62.7464	-1.6392	0.260848	-6.28411	3.29727e-10	3.27537e-09	ENSNFUG00015002982	c1qtnf6a
74.8397	-1.64016	0.402677	-4.07313	4.63847e-05	0.000194584	ENSNFUG00015001846	gdpd2
1088.29	-1.64482	0.414758	-3.96573	7.31704e-05	0.000295188	ENSNFUG00015011449	aqp1a.1
144.118	-1.65377	0.309632	-5.3411	9.23829e-08	6.33502e-07	ENSNFUG00015011188	ANPEP
121.807	-1.65916	0.149728	-11.0812	1.5484e-28	8.1731e-27	ENSNFUG00015002983	CHST12
100.374	-1.66083	0.172809	-9.61078	7.19993e-22	2.36368e-20	ENSNFUG00015003927	ABHD1
170.133	-1.67017	0.500785	-3.33511	0.000852646	0.00268504	ENSNFUG00015005849	slc6a15
395.9	-1.67266	0.141231	-11.8435	2.32626e-32	1.59404e-30	ENSNFUG00015002999
100.872	-1.68437	0.157319	-10.7068	9.46038e-27	4.41266e-25	ENSNFUG00015010896	MDGA2
53.431	-1.70675	0.322589	-5.29078	1.21793e-07	8.19373e-07	ENSNFUG00015018081	tiam1a
378.822	-1.74307	0.186881	-9.32719	1.08714e-20	3.28302e-19	ENSNFUG00015002378	gjc4a.2
199.12	-1.75002	0.178996	-9.77685	1.41544e-22	4.86725e-21	ENSNFUG00015011521	dmbx1a
95.4732	-1.76637	0.169818	-10.4015	2.43961e-25	1.04009e-23	ENSNFUG00015012583
906.049	-1.76742	0.37878	-4.6661	3.06973e-06	1.60639e-05	ENSNFUG00015002368
52.6569	-1.77287	0.334089	-5.30656	1.11711e-07	7.55051e-07	ENSNFUG00015024870	prickle2a
57.345	-1.78941	0.414493	-4.3171	1.58094e-05	7.25103e-05	ENSNFUG00015022733
79.7855	-1.79767	0.366951	-4.89894	9.63539e-07	5.55258e-06	ENSNFUG00015018722	mapk8ip2
54.3648	-1.80336	0.207436	-8.69361	3.51091e-18	8.43872e-17	ENSNFUG00015000336	pla2g10
174.543	-1.80984	0.507417	-3.56677	0.000361406	0.00124526	ENSNFUG00015001324
62.2686	-1.812	0.301296	-6.01402	1.80983e-09	1.63728e-08	ENSNFUG00015003770	drp2
393.338	-1.81891	0.495914	-3.66779	0.00024466	0.000877331	ENSNFUG00015013412	ptx3a
105.985	-1.84422	0.2256	-8.17473	2.96532e-16	6.00199e-15	ENSNFUG00015018838	cpt1b
355.851	-1.84611	0.514667	-3.587	0.000334506	0.00116107	ENSNFUG00015015344	olfm4l2
431.151	-1.86643	0.195766	-9.53399	1.51358e-21	4.85893e-20	ENSNFUG00015017960	adamts12
169.686	-1.87054	0.136604	-13.6932	1.11458e-42	1.31269e-40	ENSNFUG00015017929	NPC1L1
65.7175	-1.87591	0.269211	-6.96816	3.21119e-12	4.16747e-11	ENSNFUG00015001495	spry2
198.144	-1.89527	0.202576	-9.35587	8.2917e-21	2.51608e-19	ENSNFUG00015013798	pgp
71.1836	-1.9057	0.529947	-3.59603	0.000323111	0.00112608	ENSNFUG00015004073	b3gnt2l
1081.81	-1.91357	0.490993	-3.89735	9.72505e-05	0.000380996	ENSNFUG00015003449
62.7425	-1.91926	0.680604	-2.81994	0.00480321	0.0124534	ENSNFUG00015010237
212.897	-1.92724	0.161553	-11.9294	8.31499e-33	5.91274e-31	ENSNFUG00015013868
633.857	-1.94101	0.349375	-5.55568	2.76536e-08	2.06869e-07	ENSNFUG00015008403	f5
123.467	-1.95374	0.21695	-9.00549	2.14705e-19	5.87213e-18	ENSNFUG00015016096	eppk1
172.502	-1.95684	0.139136	-14.0642	6.30043e-45	8.30246e-43	ENSNFUG00015002211	tubb5
307.81	-1.95826	0.303301	-6.4565	1.0715e-10	1.14789e-09	ENSNFUG00015025440	fbn2b
87.2569	-1.9655	0.227357	-8.645	5.38062e-18	1.26267e-16	ENSNFUG00015018358
64.3485	-1.9744	0.187346	-10.5388	5.72214e-26	2.54311e-24	ENSNFUG00015018315
102.519	-1.97631	0.273456	-7.22715	4.93225e-13	6.97773e-12	ENSNFUG00015004952	syngr1a
85.2815	-1.97645	0.301919	-6.5463	5.898e-11	6.53007e-10	ENSNFUG00015000763
160.653	-1.99417	0.371099	-5.37368	7.71478e-08	5.36052e-07	ENSNFUG00015014834
10241.1	-2.00304	0.200349	-9.99776	1.55882e-23	5.8052e-22	ENSNFUG00015018156
255.982	-2.00675	0.570979	-3.51457	0.000440459	0.001484	ENSNFUG00015017688
58.616	-2.02709	0.549343	-3.69003	0.000224228	0.000809766	ENSNFUG00015004243	map1lc3cl
308.913	-2.03606	0.323147	-6.30073	2.96246e-10	2.97413e-09	ENSNFUG00015009692	slc22a16
62.336	-2.03763	0.17867	-11.4044	3.97515e-30	2.33357e-28	ENSNFUG00015022100	stox2a
54.3152	-2.03798	0.358891	-5.67855	1.35839e-08	1.06591e-07	ENSNFUG00015023447	gata5
77.4567	-2.03893	0.229217	-8.89516	5.83343e-19	1.50789e-17	ENSNFUG00015009530	NIPAL2
2478.29	-2.03979	0.547581	-3.7251	0.000195238	0.000713134	ENSNFUG00015002962	si:ch211-256m1.8
277.924	-2.04837	0.228738	-8.95508	3.395e-19	9.10034e-18	ENSNFUG00015012309
125.032	-2.05425	0.282385	-7.27464	3.4735e-13	5.00418e-12	ENSNFUG00015010655	cntnap5a
57.6986	-2.06934	0.381907	-5.41843	6.01257e-08	4.26103e-07	ENSNFUG00015004132
87.3252	-2.07519	0.450997	-4.60134	4.1978e-06	2.14955e-05	ENSNFUG00015012055	si:dkey-22o22.2
229.417	-2.08714	0.366154	-5.70018	1.19683e-08	9.50807e-08	ENSNFUG00015005163	lhcgr
60.3909	-2.09143	0.241251	-8.66913	4.35434e-18	1.03472e-16	ENSNFUG00015000824
263.452	-2.09596	0.198838	-10.541	5.58811e-26	2.48942e-24	ENSNFUG00015022806	hephl1b
884.015	-2.10986	0.451231	-4.6758	2.92817e-06	1.53915e-05	ENSNFUG00015014613	Nfu_g_1_012693
385.288	-2.12268	0.474407	-4.47438	7.66339e-06	3.74911e-05	ENSNFUG00015017923	si:ch1073-390k14.1
177.505	-2.12799	0.193545	-10.9948	4.04679e-28	2.03897e-26	ENSNFUG00015019017
288.808	-2.13537	0.250894	-8.51103	1.72393e-17	3.8812e-16	ENSNFUG00015018272	cspg5b
133.077	-2.13985	0.250997	-8.52541	1.52269e-17	3.45289e-16	ENSNFUG00015017731	dlk2
807.66	-2.14093	0.651508	-3.28612	0.00101579	0.0031426	ENSNFUG00015012842
607.9	-2.14107	0.378024	-5.66385	1.48017e-08	1.1521e-07	ENSNFUG00015021395
160.707	-2.15096	0.505602	-4.25425	2.09751e-05	9.38662e-05	ENSNFUG00015020392	GGT5
290.518	-2.15995	0.121504	-17.7768	1.06902e-70	2.96245e-68	ENSNFUG00015014474
159.832	-2.16184	0.174974	-12.3552	4.56543e-35	3.72428e-33	ENSNFUG00015017679
314.609	-2.16735	0.500935	-4.32662	1.51416e-05	6.98202e-05	ENSNFUG00015004639	Nfu_g_1_024366
52.7832	-2.17764	0.419935	-5.18565	2.15259e-07	1.38584e-06	ENSNFUG00015024353	SPRED2A
136.156	-2.17863	0.340273	-6.4026	1.52758e-10	1.59654e-09	ENSNFUG00015017810
108.312	-2.18856	0.25516	-8.5772	9.72144e-18	2.23403e-16	ENSNFUG00015002060	syt4
369.369	-2.20995	0.129375	-17.0817	2.02955e-65	4.90318e-63	ENSNFUG00015020013	ISYNA1
346.804	-2.22122	0.76935	-2.88714	0.00388759	0.010334	ENSNFUG00015002339
151.134	-2.23693	0.188358	-11.8759	1.57892e-32	1.09387e-30	ENSNFUG00015023211
65.1485	-2.24134	0.681233	-3.29012	0.00100146	0.00310337	ENSNFUG00015017794
93.2269	-2.25228	0.217524	-10.3542	4.00586e-25	1.68496e-23	ENSNFUG00015014585
556.258	-2.27909	0.389532	-5.85085	4.8908e-09	4.14399e-08	ENSNFUG00015008045	hsd3b2
1060.42	-2.28507	0.196375	-11.6362	2.69616e-31	1.73401e-29	ENSNFUG00015001781	soul5l
848.123	-2.286	0.222423	-10.2777	8.87794e-25	3.66074e-23	ENSNFUG00015016559	plat
299.374	-2.29624	0.229351	-10.0119	1.35107e-23	5.05148e-22	ENSNFUG00015015152	CDH4
78.3477	-2.29816	0.291851	-7.87444	3.42277e-15	6.2681e-14	ENSNFUG00015002322	anxa5a
91.2844	-2.30027	0.309959	-7.42122	1.16044e-13	1.78508e-12	ENSNFUG00015012561
874.444	-2.30716	0.0855654	-26.9637	3.94162e-160	5.71353e-157	ENSNFUG00015006950	hdac4
86.1431	-2.30745	0.607911	-3.7957	0.000147227	0.00055321	ENSNFUG00015002188	rasd2b
59.1516	-2.30823	0.428486	-5.38695	7.16616e-08	5.00887e-07	ENSNFUG00015005265	ctsl.1
103.974	-2.32657	0.301985	-7.70426	1.31607e-14	2.26284e-13	ENSNFUG00015010695	cav4b
111.867	-2.32855	0.195512	-11.91	1.05e-32	7.38293e-31	ENSNFUG00015023332	adamts9
114.999	-2.33213	0.218752	-10.6611	1.54795e-26	7.0972e-25	ENSNFUG00015018981	znf362a
76.2854	-2.33347	0.264441	-8.82416	1.1028e-18	2.78194e-17	ENSNFUG00015000700	FHL2
193.918	-2.34229	0.238582	-9.81756	9.4607e-23	3.31371e-21	ENSNFUG00015016590
102.828	-2.34841	0.175275	-13.3984	6.17843e-41	6.69117e-39	ENSNFUG00015002226
1903.56	-2.35288	0.108677	-21.6502	6.05356e-104	3.25924e-101	ENSNFUG00015018193	FAM187A
74.0821	-2.35311	0.42959	-5.47757	4.31205e-08	3.12524e-07	ENSNFUG00015022876
223.718	-2.38041	0.552305	-4.30995	1.63294e-05	7.45606e-05	ENSNFUG00015018297	slc34a2b
141.079	-2.3824	0.26404	-9.0229	1.8318e-19	5.06134e-18	ENSNFUG00015002347	scg5
74.1924	-2.38547	0.530541	-4.49629	6.91482e-06	3.41465e-05	ENSNFUG00015009023
86.3605	-2.44723	0.316674	-7.7279	1.09339e-14	1.89373e-13	ENSNFUG00015023337	INSYN2A
62.0839	-2.46541	0.387017	-6.3703	1.88664e-10	1.94485e-09	ENSNFUG00015020613	ldlrb
55.6811	-2.46802	0.272301	-9.06357	1.26247e-19	3.53492e-18	ENSNFUG00015021065	itih3a.1
120.605	-2.50488	0.25842	-9.69304	3.22771e-22	1.09002e-20	ENSNFUG00015017310	hmox1a
512.849	-2.51848	0.611483	-4.11864	3.81113e-05	0.000162877	ENSNFUG00015023122
175.411	-2.53002	0.180296	-14.0326	9.84571e-45	1.27077e-42	ENSNFUG00015015701
754.858	-2.54439	0.100183	-25.3974	2.69645e-142	2.67431e-139	ENSNFUG00015020481	FNDC7
131.021	-2.54739	0.227075	-11.2183	3.31647e-29	1.82735e-27	ENSNFUG00015024234	ces2b
61.5175	-2.57739	0.442703	-5.82193	5.81703e-09	4.84812e-08	ENSNFUG00015005544	serpinf1
109.522	-2.5801	0.394407	-6.54172	6.0815e-11	6.72534e-10	ENSNFUG00015008436	Nfu_g_1_006903
115.163	-2.58574	0.596206	-4.33699	1.44446e-05	6.69274e-05	ENSNFUG00015008822	GLUL
1500.6	-2.60136	0.12214	-21.2982	1.18073e-100	5.85518e-98	ENSNFUG00015006406	ribc1
749.211	-2.63825	0.4125	-6.39575	1.5976e-10	1.66327e-09	ENSNFUG00015016101
2461.18	-2.70105	0.0511295	-52.8277	0	0	ENSNFUG00015004861	gba2
275.322	-2.74302	0.161378	-16.9975	8.5678e-65	1.99323e-62	ENSNFUG00015019363	hdhd2
79.7374	-2.75268	0.275646	-9.98629	1.75016e-23	6.50494e-22	ENSNFUG00015014524	tuba8l5
2805.73	-2.75929	0.507376	-5.43835	5.37762e-08	3.84285e-07	ENSNFUG00015022234
1241.14	-2.76718	0.0762817	-36.2758	3.89334e-288	1.22277e-284	ENSNFUG00015011969	efhc1
186.907	-2.76858	0.291746	-9.48967	2.31761e-21	7.32285e-20	ENSNFUG00015019285	Nfu_g_1_002684
108.814	-2.78036	0.239997	-11.585	4.91139e-31	3.11617e-29	ENSNFUG00015020519
50.3301	-2.78848	0.309865	-8.99901	2.27766e-19	6.19339e-18	ENSNFUG00015019681
6192.44	-2.79603	0.369038	-7.57654	3.54901e-14	5.81039e-13	ENSNFUG00015001215	cyp17a1
219.345	-2.83067	0.559438	-5.05985	4.19581e-07	2.57208e-06	ENSNFUG00015018792	saa
668.742	-2.94579	0.271007	-10.8698	1.6056e-27	7.81806e-26	ENSNFUG00015006055
221.371	-2.94677	0.711339	-4.14257	3.43431e-05	0.000147855	ENSNFUG00015021100	si:rp71-17i16.5
880.526	-2.99098	0.112268	-26.6413	2.25517e-156	2.8331e-153	ENSNFUG00015021001	ZDHHC12
103.189	-3.02156	0.403596	-7.48661	7.06745e-14	1.11634e-12	ENSNFUG00015001522	fstl5
56.2324	-3.06979	0.228451	-13.4374	3.64853e-41	3.99726e-39	ENSNFUG00015004413	APOH
489.497	-3.07812	1.10184	-2.79361	0.00521236	0.013369	ENSNFUG00015006249	calml4a
328.057	-3.07835	0.134125	-22.9514	1.42596e-116	1.07483e-113	ENSNFUG00015018209	mst1
78.1381	-3.0946	0.476789	-6.49049	8.55577e-11	9.2925e-10	ENSNFUG00015000767	col28a2b
63.4328	-3.09691	0.555196	-5.57805	2.43224e-08	1.83847e-07	ENSNFUG00015016004
69.2148	-3.20975	0.230662	-13.9154	5.10774e-44	6.37419e-42	ENSNFUG00015003048	mat1a
278.399	-3.23245	0.547626	-5.90266	3.57691e-09	3.10614e-08	ENSNFUG00015009109
496.483	-3.28018	0.118142	-27.7648	1.15579e-169	1.97997e-166	ENSNFUG00015013852	ADARB1
374.856	-3.28134	0.221853	-14.7906	1.68476e-49	2.56029e-47	ENSNFUG00015020301	tuba1c
120.042	-3.33727	0.301489	-11.0693	1.76788e-28	9.27964e-27	ENSNFUG00015022981	ANKRD63
56.6695	-3.35189	0.272549	-12.2983	9.24981e-35	7.32367e-33	ENSNFUG00015020146	cyb5r2
193.741	-3.45349	0.36876	-9.36513	7.59557e-21	2.31603e-19	ENSNFUG00015014856
115.238	-3.4557	0.537849	-6.42505	1.31826e-10	1.39558e-09	ENSNFUG00015013624
55.3001	-3.46959	0.473265	-7.33117	2.28149e-13	3.35354e-12	ENSNFUG00015018294	cpne4b
137.708	-3.50434	0.327967	-10.685	1.19592e-26	5.55072e-25	ENSNFUG00015007734
454.249	-3.56815	0.114441	-31.1789	2.05882e-213	4.84956e-210	ENSNFUG00015010634	mdm1
106.827	-3.68043	0.707488	-5.20211	1.97038e-07	1.2777e-06	ENSNFUG00015000252	MFAP4
75.5592	-3.70184	0.254128	-14.5668	4.5662e-48	6.51859e-46	ENSNFUG00015023779	pnkd
210.397	-3.71222	0.210165	-17.6634	8.03266e-70	2.16239e-67	ENSNFUG00015006860
461.624	-3.74839	0.12122	-30.9222	6.01665e-210	1.25975e-206	ENSNFUG00015024718	ccng1
188.953	-3.75035	1.17095	-3.20283	0.00136084	0.00406849	ENSNFUG00015009675
135.98	-3.79473	0.690522	-5.49546	3.89702e-08	2.84303e-07	ENSNFUG00015015450	tp53bp2b
80.6061	-3.80176	0.257784	-14.7478	3.17636e-49	4.75043e-47	ENSNFUG00015001480	APOC2
286.53	-3.97955	0.307561	-12.9391	2.70853e-38	2.60406e-36	ENSNFUG00015014467	gstr
91.9486	-4.00711	0.399835	-10.0219	1.22121e-23	4.60249e-22	ENSNFUG00015010582
469.787	-4.04878	0.662727	-6.10927	1.00087e-09	9.27715e-09	ENSNFUG00015015239
105.691	-4.12727	0.33382	-12.3637	4.10558e-35	3.37841e-33	ENSNFUG00015014326	cct4
116.609	-4.6027	0.32798	-14.0335	9.72977e-45	1.26447e-42	ENSNFUG00015018046
200.006	-4.75882	0.529895	-8.98069	2.69062e-19	7.24315e-18	ENSNFUG00015021537	slc14a2
148.33	-4.88469	0.234895	-20.7952	4.77942e-96	2.19667e-93	ENSNFUG00015007553	lyrm1
57.7385	-4.91309	0.799108	-6.14822	7.83579e-10	7.39027e-09	ENSNFUG00015001183	zgc:153372
63.14	-5.13206	0.378184	-13.5703	6.00967e-42	6.90526e-40	ENSNFUG00015014908
115.224	-5.14246	0.451898	-11.3797	5.2788e-30	3.07968e-28	ENSNFUG00015020375
478.388	-5.18496	0.231041	-22.4417	1.54099e-111	1.0755e-108	ENSNFUG00015005130	pef1
1167.84	-5.28933	0.307525	-17.1997	2.67003e-66	6.53428e-64	ENSNFUG00015015438	postnb
56.6946	-5.34703	0.441764	-12.1038	1.00809e-33	7.47893e-32	ENSNFUG00015018456	nop2
162.386	-5.43713	0.437296	-12.4335	1.71895e-35	1.43327e-33	ENSNFUG00015002316	scara3
908.57	-5.4518	0.31231	-17.4564	3.07927e-68	7.84133e-66	ENSNFUG00015022782	si:zfos-323e3.4
86.0057	-5.50625	0.497136	-11.0759	1.64147e-28	8.64017e-27	ENSNFUG00015020764	mss51
105.651	-5.90916	0.941421	-6.27685	3.45507e-10	3.41233e-09	ENSNFUG00015022614
92.1438	-6.01305	0.320297	-18.7734	1.24697e-78	4.19606e-76	ENSNFUG00015007066	gdf11
191.883	-6.10979	0.843638	-7.24219	4.41502e-13	6.26481e-12	ENSNFUG00015011016	dner
201.333	-6.38848	0.346146	-18.456	4.66544e-76	1.46526e-73	ENSNFUG00015020656
382.985	-6.95278	0.282922	-24.5749	2.34105e-133	2.10071e-130	ENSNFUG00015001245
1008.91	-7.41212	0.977261	-7.58458	3.33553e-14	5.48707e-13	ENSNFUG00015010608
1274.73	-7.52153	0.17507	-42.963	0	0	ENSNFUG00015004186
85.9851	-7.64411	0.655804	-11.6561	2.13618e-31	1.3833e-29	ENSNFUG00015005063
191.648	-8.68108	1.45371	-5.97167	2.34842e-09	2.09435e-08	ENSNFUG00015022834
67.9113	-9.20815	1.67051	-5.51217	3.54433e-08	2.6059e-07	ENSNFUG00015023943	comtd1
619.784	-10.0843	0.857493	-11.7602	6.25503e-32	4.20963e-30	ENSNFUG00015011977
