# Supplementary material
Source: Research Square preprint supplement (doi:10.21203/rs.3.rs-8995976/v1)
Supplement: Supplementary file 4 [file bf732f632d8ae356e5251193.xlsx]

## Sheet: Sheet 1
ID	Description	GeneRatio	BgRatio	RichFactor	FoldEnrichment	zScore	pvalue	p.adjust	qvalue	geneID	Count	killifish_gene_name	zebrafish_gene_name	Up	Down	TotalGO	Matched
GO:0001525	angiogenesis	43/937	245/11544	0.17551	2.16232	5.46538	1.02803e-06	0.00208788	0.00192772	ENSDARG00000052615/ENSDARG00000107130/ENSDARG00000042561/ENSDARG00000103554/ENSDARG00000086778/ENSDARG00000074635/ENSDARG00000031761/ENSDARG00000034368/ENSDARG00000059832/ENSDARG00000075549/ENSDARG00000009134/ENSDARG00000056642/ENSDARG00000074829/ENSDARG00000037895/ENSDARG00000075437/ENSDARG00000054632/ENSDARG00000041869/ENSDARG00000005368/ENSDARG00000102153/ENSDARG00000034503/ENSDARG00000009488/…	43	tnmd/Nfu_g_1_006350/lpar2b/notch1a/pdgfba/abca1a/dab2/hexb/adgrb3/cdh5/hlx1/hdac9b/rasip1/ramp2/shc1/fli1/tnfrsf19/mcamb/nrp1a/per2/gipc2/cxcr4a/itgb8/CU570987.1/slc2a1b/serpinf1/alox5ap/tgfbr3/cpn1/pik3c2a/igf2b/sema3e/itgav/nostrin/plekhg5b/itga5/IQSEC1/angptl1a/kdr/tie1/adgra2/calcrla/tnfrsf21	tnmd//lpar2b/notch1a/pdgfba/abca1a/dab2/hexb/adgrb3/cdh5/hlx1/hdac9b/rasip1/ramp2/shc1/fli1/tnfrsf19/mcamb/nrp1a/per2/gipc2/cxcr4a/itgb8/si:ch73-40a2.1/slc2a1b/serpinf1/alox5ap/tgfbr3/cpn1/pik3c2a/igf2b/sema3e/itgav/nostrin/plekhg5b/itga5/IQSEC1/angptl1a/kdr/tie1/adgra2/calcrla/tnfrsf21	37	4	43	41
GO:0007229	integrin-mediated signaling pathway	15/937	46/11544	0.326087	4.01745	6.09453	1.81951e-06	0.00208788	0.00192772	ENSDARG00000056018/ENSDARG00000030938/ENSDARG00000044694/ENSDARG00000001452/ENSDARG00000056767/ENSDARG00000069946/ENSDARG00000028222/ENSDARG00000012824/ENSDARG00000078707/ENSDARG00000006314/ENSDARG00000103056/ENSDARG00000016939/ENSDARG00000012942/ENSDARG00000006353/ENSDARG00000007950	15	itga6l/fermt3b/fyb1b//itgb3a/itga6b/itgb8/itga3b/sema7a/itgav/itga4/itgb2/itgb5/itga5/ITGA11	itga6l/fermt3b/fyb1b/adam8a/itgb3a/itga6b/itgb8/itga3b/sema7a/itgav/itga4/itgb2/itgb5/itga5/itga11b	12	1	15	13
GO:0070887	cellular response to chemical stimulus	68/937	480/11544	0.141667	1.74536	4.95749	3.54076e-06	0.00210105	0.00193987	ENSDARG00000013961/ENSDARG00000074662/ENSDARG00000016570/ENSDARG00000026548/ENSDARG00000102082/ENSDARG00000044795/ENSDARG00000034852/ENSDARG00000028661/ENSDARG00000026081/ENSDARG00000027529/ENSDARG00000071091/ENSDARG00000036505/ENSDARG00000069598/ENSDARG00000102776/ENSDARG00000089043/ENSDARG00000037895/ENSDARG00000018569/ENSDARG00000042014/ENSDARG00000035966/ENSDARG00000018283/ENSDARG00000010250/…	68	slc31a1/Nfu_g_1_018191/prlra/cyp2u1/nr3c2/entpd2b/nt5c2l1/cntfr/lhcgr/hmox1a/chrm3a/syt4/chrm5b//ptpn6/ramp2/tnfrsf1a/cyp11c1/pgr/cyba/nqo1/cd276/syt7b/cyp2r1/adgrl3.1/lyn/ccr12a/cxcr4a/nr1d4b/il13ra2/IL2RGA/nos1/slc39a14/rxfp2a/hspb8/ar/inpp5kb/ch25h/cpn1/entpd1/cftr/igf2b/serp2/irs2b/ptprna/itgb2/nfe2l2a/gnai3/keap1a/lgals3b/chrm5a/spint1a/brinp3a.2/il12rb2/kita/jak3/jak1/ghra/nr5a1a/cmklr1/gna…	slc31a1/cntf/prlra/cyp2u1/nr3c2/entpd2b/nt5c2l1/cntfr/lhcgr/hmox1a/chrm3a/syt4/chrm5b/cxcl19/ptpn6/ramp2/tnfrsf1a/cyp11c1/pgr/cyba/nqo1/cd276/syt7b/cyp2r1/adgrl3.1/lyn/ccr12a/cxcr4a/nr1d4b/il13ra2/il2rga/nos1/slc39a14/rxfp2a/hspb8/ar/inpp5kb/ch25h/cpn1/entpd1/cftr/igf2b/serp2/irs2b/ptprna/itgb2/nfe2l2a/gnai3/keap1a/lgals3b/chrm5a/spint1a/brinp3a.2/il12rb2/kita/jak3/jak1/ghra/nr5a1a/cmklr1/gna14a/…	57	8	68	65
GO:0033627	cell adhesion mediated by integrin	12/937	32/11544	0.375	4.62006	6.09465	3.7387e-06	0.00210105	0.00193987	ENSDARG00000056018/ENSDARG00000030938/ENSDARG00000056767/ENSDARG00000069946/ENSDARG00000028222/ENSDARG00000012824/ENSDARG00000006314/ENSDARG00000103056/ENSDARG00000016939/ENSDARG00000012942/ENSDARG00000006353/ENSDARG00000007950	12	itga6l/fermt3b/itgb3a/itga6b/itgb8/itga3b/itgav/itga4/itgb2/itgb5/itga5/ITGA11	itga6l/fermt3b/itgb3a/itga6b/itgb8/itga3b/itgav/itga4/itgb2/itgb5/itga5/itga11b	10	1	12	11
GO:0007155	cell adhesion	63/937	437/11544	0.144165	1.77613	4.916	4.57745e-06	0.00210105	0.00193987	ENSDARG00000036175/ENSDARG00000056018/ENSDARG00000103774/ENSDARG00000030938/ENSDARG00000076312/ENSDARG00000102824/ENSDARG00000014059/ENSDARG00000075549/ENSDARG00000001452/ENSDARG00000044968/ENSDARG00000060610/ENSDARG00000073883/ENSDARG00000062831/ENSDARG00000056767/ENSDARG00000004597/ENSDARG00000102445/ENSDARG00000005112/ENSDARG00000089292/ENSDARG00000100781/ENSDARG00000043241/ENSDARG00000006526/…	63	pcdh1b/itga6l/limch1b/fermt3b/myot/pcdh10b/cldn5b/cdh5//vcla/pcdh7b/clstn3/si:ch73-22o12.1/itgb3a/lrrc4ba/si:dkey-22o22.2/cdh17/adgrl1a/col28a2b/arrb1/fn1b/cd276/gpnmb/kirrel1b/itga6b/itgb8/cdh4/frem1a/cldn7b/ncam1a/postna/MPZL2/cadm2a/itga3b/cdh2/radil2b/sdk2b/LAMB1/hapln3/igf2b/parvb/itgav/itga4/itgb2/itgb5/itga5/lamb2l/mxra8b/cntn3a.1/THBS1/vcam1b/plpp3/dlg1/tie1/fbn2b/ripor2/ITGA11/ptk2bb/tnf…	pcdh1b/itga6l/limch1b/fermt3b/myot/pcdh10b/cldn5b/cdh5/adam8a/vcla/pcdh7b/clstn3/si:ch73-22o12.1/itgb3a/lrrc4ba/si:dkey-22o22.2/cdh17/adgrl1a/col28a2b/arrb1/fn1b/cd276/triobpa/gpnmb/kirrel1b/itga6b/itgb8/cdh4/frem1a/cldn7b/ncam1a/postna/mpzl2b/cadm2a/itga3b/cdh2/radil2b/sdk2b/lamb1a/hapln3/igf2b/spon1b/parvb/itgav/itga4/itgb2/itgb5/itga5/lamb2l/mxra8b/cntn3a.1/THBS1/vcam1b/plpp3/dlg1a/tie1/fbn2b/…	48	8	63	56
GO:0010033	response to organic substance	67/937	480/11544	0.139583	1.71969	4.78678	6.95458e-06	0.00266013	0.00245606	ENSDARG00000006865/ENSDARG00000013961/ENSDARG00000074662/ENSDARG00000016570/ENSDARG00000102082/ENSDARG00000044795/ENSDARG00000028661/ENSDARG00000026081/ENSDARG00000071091/ENSDARG00000069598/ENSDARG00000102776/ENSDARG00000089043/ENSDARG00000037861/ENSDARG00000030163/ENSDARG00000037895/ENSDARG00000087832/ENSDARG00000042014/ENSDARG00000035966/ENSDARG00000003061/ENSDARG00000056587/ENSDARG00000061121/…	67	glra4a/slc31a1/Nfu_g_1_018191/prlra/nr3c2/entpd2b/cntfr/lhcgr/chrm3a/chrm5b//ptpn6/slc2a3b/cdk21/ramp2/cyp11c1/pgr/cd276/cyp2r1/adgrl3.1/cxcr4a/gpr84/slc2a1b/cyp24a1/nr1d4b/il13ra2/IL2RGA/nos1/slc39a14/rxfp2a/hspb8/ar/inpp5kb/p2rx1/timp2a/cpn1/entpd1/cftr/igf2b/cpt1b/meak7/serp2/irs2b/adcy5/ptprna/nfe2l2a/gnai3/keap1a/chrm5a/brinp3a.2/il12rb2/kita/jak3/gadd45ba/jak1/ghra/nr5a1a/p2rx2/gna14a/ripor…	glra4a/slc31a1/cntf/prlra/nr3c2/entpd2b/cntfr/lhcgr/chrm3a/chrm5b/cxcl19/ptpn6/slc2a3b/cdk21/ramp2/bcl3/cyp11c1/pgr/cd276/cyp2r1/adgrl3.1/cxcr4a/gpr84/slc2a1b/cyp24a1/nr1d4b/il13ra2/il2rga/nos1/slc39a14/rxfp2a/hspb8/ar/inpp5kb/p2rx1/timp2a/cpn1/entpd1/cftr/igf2b/cpt1b/meak7/serp2/irs2b/adcy5/ptprna/nfe2l2a/gnai3/keap1a/chrm5a/brinp3a.2/il12rb2/kita/jak3/gadd45ba/jak1/ghra/nr5a1a/p2rx2/gna14a/ripo…	54	9	67	63
GO:0098609	cell-cell adhesion	41/937	251/11544	0.163347	2.01246	4.81995	1.15254e-05	0.00286926	0.00264915	ENSDARG00000036175/ENSDARG00000056018/ENSDARG00000030938/ENSDARG00000076312/ENSDARG00000102824/ENSDARG00000075549/ENSDARG00000001452/ENSDARG00000060610/ENSDARG00000073883/ENSDARG00000062831/ENSDARG00000056767/ENSDARG00000004597/ENSDARG00000102445/ENSDARG00000005112/ENSDARG00000089292/ENSDARG00000043241/ENSDARG00000003061/ENSDARG00000056998/ENSDARG00000069946/ENSDARG00000028222/ENSDARG00000015002/…	41	pcdh1b/itga6l/fermt3b/myot/pcdh10b/cdh5//pcdh7b/clstn3/si:ch73-22o12.1/itgb3a/lrrc4ba/si:dkey-22o22.2/cdh17/adgrl1a/arrb1/cd276/kirrel1b/itga6b/itgb8/cdh4/cldn7b/MPZL2/cadm2a/itga3b/cdh2/sdk2b/igf2b/itgav/itga4/itgb2/itgb5/itga5/cntn3a.1/vcam1b/plpp3/dlg1/tie1/ripor2/ITGA11/tnfrsf21	pcdh1b/itga6l/fermt3b/myot/pcdh10b/cdh5/adam8a/pcdh7b/clstn3/si:ch73-22o12.1/itgb3a/lrrc4ba/si:dkey-22o22.2/cdh17/adgrl1a/arrb1/cd276/kirrel1b/itga6b/itgb8/cdh4/cldn7b/mpzl2b/cadm2a/itga3b/cdh2/sdk2b/igf2b/itgav/itga4/itgb2/itgb5/itga5/cntn3a.1/vcam1b/plpp3/dlg1a/tie1/ripor2/itga11b/tnfrsf21	34	4	41	38
GO:0050900	leukocyte migration	18/937	72/11544	0.25	3.08004	5.26201	1.2241e-05	0.00286926	0.00264915	ENSDARG00000056018/ENSDARG00000001452/ENSDARG00000027529/ENSDARG00000102776/ENSDARG00000018569/ENSDARG00000018283/ENSDARG00000067916/ENSDARG00000069946/ENSDARG00000045190/ENSDARG00000012824/ENSDARG00000041107/ENSDARG00000079773/ENSDARG00000016939/ENSDARG00000044001/ENSDARG00000102332/ENSDARG00000061752/ENSDARG00000070873/ENSDARG00000076972	18	itga6l//hmox1a/tnfrsf1a/cyba/lyn/itga6b/ch25h/itga3b/cftr/nox5/itgb2/lgals3b/spint1a/ripor2/ccl25b/plvapa	itga6l/adam8a/hmox1a/cxcl19/tnfrsf1a/cyba/lyn/itga6b/ch25h/itga3b/cftr/nox5/itgb2/lgals3b/spint1a/ripor2/ccl25b/plvapa	13	3	18	16
GO:0001568	blood vessel development	51/937	340/11544	0.15	1.84803	4.71731	1.24459e-05	0.00286926	0.00264915	ENSDARG00000052615/ENSDARG00000031737/ENSDARG00000107130/ENSDARG00000042561/ENSDARG00000103554/ENSDARG00000086778/ENSDARG00000074635/ENSDARG00000031761/ENSDARG00000034368/ENSDARG00000059832/ENSDARG00000075549/ENSDARG00000009134/ENSDARG00000013441/ENSDARG00000056642/ENSDARG00000074829/ENSDARG00000037895/ENSDARG00000075437/ENSDARG00000000943/ENSDARG00000054632/ENSDARG00000041869/ENSDARG00000005368/…	51	tnmd/pthlha/Nfu_g_1_006350/lpar2b/notch1a/pdgfba/abca1a/dab2/hexb/adgrb3/cdh5/hlx1/hey2/hdac9b/rasip1/ramp2/shc1/dzip1/fli1/tnfrsf19/mcamb/nrp1a/per2/gipc2/cxcr4a/itgb8/CU570987.1/cdkn1a/slc2a1b/serpinf1/alox5ap/tgfbr3/cpn1/cdh2/pik3c2a/igf2b/sema3e/itgav/itga4/nostrin/plekhg5b/itga5/IQSEC1/marcksl1a/angptl1a/kdr/tie1/fbn2b/adgra2/calcrla/tnfrsf21	tnmd/pthlha//lpar2b/notch1a/pdgfba/abca1a/dab2/hexb/adgrb3/cdh5/hlx1/hey2/hdac9b/rasip1/ramp2/shc1/dzip1/fli1/tnfrsf19/mcamb/nrp1a/per2/gipc2/cxcr4a/itgb8/si:ch73-40a2.1/cdkn1a/slc2a1b/serpinf1/alox5ap/tgfbr3/cpn1/cdh2/pik3c2a/igf2b/sema3e/itgav/itga4/nostrin/plekhg5b/itga5/IQSEC1/marcksl1a/angptl1a/kdr/tie1/fbn2b/adgra2/calcrla/tnfrsf21	42	7	51	49
GO:0042554	superoxide anion generation	7/937	12/11544	0.583333	7.18677	6.37287	1.25022e-05	0.00286926	0.00264915	ENSDARG00000060148/ENSDARG00000040812/ENSDARG00000018283/ENSDARG00000005821/ENSDARG00000033735/ENSDARG00000056615/ENSDARG00000103251	7	sh3pxd2aa/ncf4/cyba/ncf2/ncf1/cybb/sh3pxd2b	sh3pxd2aa/ncf4/cyba/ncf2/ncf1/cybb/sh3pxd2b	7	0	7	7
GO:0048514	blood vessel morphogenesis	47/937	307/11544	0.153094	1.88615	4.67718	1.58737e-05	0.00331183	0.00305777	ENSDARG00000052615/ENSDARG00000107130/ENSDARG00000042561/ENSDARG00000103554/ENSDARG00000086778/ENSDARG00000074635/ENSDARG00000031761/ENSDARG00000034368/ENSDARG00000059832/ENSDARG00000075549/ENSDARG00000009134/ENSDARG00000013441/ENSDARG00000056642/ENSDARG00000074829/ENSDARG00000037895/ENSDARG00000075437/ENSDARG00000054632/ENSDARG00000041869/ENSDARG00000005368/ENSDARG00000102153/ENSDARG00000034503/…	47	tnmd/Nfu_g_1_006350/lpar2b/notch1a/pdgfba/abca1a/dab2/hexb/adgrb3/cdh5/hlx1/hey2/hdac9b/rasip1/ramp2/shc1/fli1/tnfrsf19/mcamb/nrp1a/per2/gipc2/cxcr4a/itgb8/CU570987.1/slc2a1b/serpinf1/alox5ap/tgfbr3/cpn1/cdh2/pik3c2a/igf2b/sema3e/itgav/nostrin/plekhg5b/itga5/IQSEC1/marcksl1a/angptl1a/kdr/tie1/fbn2b/adgra2/calcrla/tnfrsf21	tnmd//lpar2b/notch1a/pdgfba/abca1a/dab2/hexb/adgrb3/cdh5/hlx1/hey2/hdac9b/rasip1/ramp2/shc1/fli1/tnfrsf19/mcamb/nrp1a/per2/gipc2/cxcr4a/itgb8/si:ch73-40a2.1/slc2a1b/serpinf1/alox5ap/tgfbr3/cpn1/cdh2/pik3c2a/igf2b/sema3e/itgav/nostrin/plekhg5b/itga5/IQSEC1/marcksl1a/angptl1a/kdr/tie1/fbn2b/adgra2/calcrla/tnfrsf21	40	5	47	45
GO:0001944	vasculature development	57/937	402/11544	0.141791	1.74689	4.53024	2.14264e-05	0.00409779	0.00378344	ENSDARG00000052615/ENSDARG00000031737/ENSDARG00000107130/ENSDARG00000042561/ENSDARG00000103554/ENSDARG00000086778/ENSDARG00000074635/ENSDARG00000074378/ENSDARG00000031761/ENSDARG00000034368/ENSDARG00000059832/ENSDARG00000075549/ENSDARG00000009134/ENSDARG00000013441/ENSDARG00000056642/ENSDARG00000074829/ENSDARG00000037895/ENSDARG00000075437/ENSDARG00000000943/ENSDARG00000054632/ENSDARG00000061796/…	57	tnmd/pthlha/Nfu_g_1_006350/lpar2b/notch1a/pdgfba/abca1a/junba/dab2/hexb/adgrb3/cdh5/hlx1/hey2/hdac9b/rasip1/ramp2/shc1/dzip1/fli1/rasgrp4/tnfrsf19/mcamb/nrp1a/per2/gipc2/cxcr4a/itgb8/CU570987.1/cdkn1a/slc2a1b//serpinf1/alox5ap/tgfbr3/cpn1/cdh2/pik3c2a/smpd3/igf2b/sema3e/itgav/itga4/nostrin/plekhg5b/itga5/mafba/IQSEC1/marcksl1a/vcam1b/angptl1a/kdr/tie1/fbn2b/adgra2/calcrla/tnfrsf21	tnmd/pthlha//lpar2b/notch1a/pdgfba/abca1a/junba/dab2/hexb/adgrb3/cdh5/hlx1/hey2/hdac9b/rasip1/ramp2/shc1/dzip1/fli1/rasgrp4/tnfrsf19/mcamb/nrp1a/per2/gipc2/cxcr4a/itgb8/si:ch73-40a2.1/cdkn1a/slc2a1b/tnfrsf1b/serpinf1/alox5ap/tgfbr3/cpn1/cdh2/pik3c2a/smpd3/igf2b/sema3e/itgav/itga4/nostrin/plekhg5b/itga5/mafba/IQSEC1/marcksl1a/vcam1b/angptl1a/kdr/tie1/fbn2b/adgra2/calcrla/tnfrsf21	47	7	57	54
GO:0031589	cell-substrate adhesion	18/937	77/11544	0.233766	2.88004	4.91949	3.27719e-05	0.0057855	0.00534169	ENSDARG00000056018/ENSDARG00000103774/ENSDARG00000030938/ENSDARG00000056767/ENSDARG00000006526/ENSDARG00000075870/ENSDARG00000069946/ENSDARG00000012824/ENSDARG00000079791/ENSDARG00000101209/ENSDARG00000019117/ENSDARG00000006314/ENSDARG00000103056/ENSDARG00000016939/ENSDARG00000012942/ENSDARG00000006353/ENSDARG00000033950/ENSDARG00000007950	18	itga6l/limch1b/fermt3b/itgb3a/fn1b//itga6b/itga3b/radil2b/LAMB1/parvb/itgav/itga4/itgb2/itgb5/itga5/lamb2l/ITGA11	itga6l/limch1b/fermt3b/itgb3a/fn1b/triobpa/itga6b/itga3b/radil2b/lamb1a/parvb/itgav/itga4/itgb2/itgb5/itga5/lamb2l/itga11b	14	1	18	15
GO:0071310	cellular response to organic substance	47/937	321/11544	0.146417	1.80389	4.34137	5.04609e-05	0.00827198	0.00763742	ENSDARG00000013961/ENSDARG00000074662/ENSDARG00000016570/ENSDARG00000102082/ENSDARG00000044795/ENSDARG00000028661/ENSDARG00000026081/ENSDARG00000102776/ENSDARG00000089043/ENSDARG00000037895/ENSDARG00000042014/ENSDARG00000035966/ENSDARG00000003061/ENSDARG00000056587/ENSDARG00000061121/ENSDARG00000057633/ENSDARG00000059370/ENSDARG00000039436/ENSDARG00000068858/ENSDARG00000068910/ENSDARG00000102387/…	47	slc31a1/Nfu_g_1_018191/prlra/nr3c2/entpd2b/cntfr/lhcgr//ptpn6/ramp2/cyp11c1/pgr/cd276/cyp2r1/adgrl3.1/cxcr4a/nr1d4b/il13ra2/IL2RGA/nos1/slc39a14/rxfp2a/hspb8/ar/inpp5kb/cpn1/entpd1/cftr/igf2b/serp2/irs2b/ptprna/nfe2l2a/gnai3/keap1a/brinp3a.2/il12rb2/kita/jak3/jak1/ghra/nr5a1a/gna14a/ripor2/CSF3R/GNB5/ccl25b	slc31a1/cntf/prlra/nr3c2/entpd2b/cntfr/lhcgr/cxcl19/ptpn6/ramp2/cyp11c1/pgr/cd276/cyp2r1/adgrl3.1/cxcr4a/nr1d4b/il13ra2/il2rga/nos1/slc39a14/rxfp2a/hspb8/ar/inpp5kb/cpn1/entpd1/cftr/igf2b/serp2/irs2b/ptprna/nfe2l2a/gnai3/keap1a/brinp3a.2/il12rb2/kita/jak3/jak1/ghra/nr5a1a/gna14a/ripor2/csf3r/gnb5b/ccl25b	38	6	47	44
GO:0015711	organic anion transport	35/937	216/11544	0.162037	1.99632	4.39323	5.88091e-05	0.0089978	0.00830756	ENSDARG00000026137/ENSDARG00000017165/ENSDARG00000013926/ENSDARG00000055226/ENSDARG00000075831/ENSDARG00000099344/ENSDARG00000012881/ENSDARG00000037861/ENSDARG00000018980/ENSDARG00000069823/ENSDARG00000063539/ENSDARG00000005894/ENSDARG00000041644/ENSDARG00000036237/ENSDARG00000074533/ENSDARG00000018621/ENSDARG00000091061/ENSDARG00000007412/ENSDARG00000098438/ENSDARG00000027065/ENSDARG00000000730/…	35	sfxn5b/slc3a1/slc16a9a/slc7a7/slc7a8a/pla2g10/slc4a1a/slc2a3b/slc52a3-2b/proca1/slc25a15a/slc7a9//slc27a2a/slc25a38b/slc6a19a.1/slc38a3b/slc2a1b/slc6a6b/slc38a3a/slc6a22.1/slco2b1/slc22a6l/slc43a2b/cftr/cpt1b/slc4a10b/si:ch211-117c9.5/slc17a9b/slc38a6/slc52a2/slc5a6a/slco4a1/slc4a4b/slc6a8	sfxn5b/slc3a1/slc16a9a/slc7a7/slc7a8a/pla2g10/slc4a1a/slc2a3b/slc52a3-2b/proca1/slc25a15a/slc7a9/cltrn/slc27a2a/slc25a38b/slc6a19a.1/slc38a3b/slc2a1b/slc6a6b/slc38a3a/slc6a22.1/slco2b1/slc22a6l/slc43a2b/cftr/cpt1b/slc4a10b/si:ch211-117c9.5/slc17a9b/slc38a6/slc52a2/slc5a6a/slco4a1/slc4a4b/slc6a8	31	3	35	34
GO:0007160	cell-matrix adhesion	14/937	54/11544	0.259259	3.19412	4.80319	7.305e-05	0.0104781	0.00967432	ENSDARG00000056018/ENSDARG00000103774/ENSDARG00000030938/ENSDARG00000056767/ENSDARG00000006526/ENSDARG00000069946/ENSDARG00000012824/ENSDARG00000019117/ENSDARG00000006314/ENSDARG00000103056/ENSDARG00000016939/ENSDARG00000012942/ENSDARG00000006353/ENSDARG00000007950	14	itga6l/limch1b/fermt3b/itgb3a/fn1b/itga6b/itga3b/parvb/itgav/itga4/itgb2/itgb5/itga5/ITGA11	itga6l/limch1b/fermt3b/itgb3a/fn1b/itga6b/itga3b/parvb/itgav/itga4/itgb2/itgb5/itga5/itga11b	12	1	14	13
GO:0097435	supramolecular fiber organization	53/937	383/11544	0.138381	1.70488	4.16961	8.01695e-05	0.0108229	0.00999264	ENSDARG00000011961/ENSDARG00000103774/ENSDARG00000012729/ENSDARG00000076312/ENSDARG00000013422/ENSDARG00000074812/ENSDARG00000054389/ENSDARG00000044968/ENSDARG00000025089/ENSDARG00000099672/ENSDARG00000033655/ENSDARG00000009133/ENSDARG00000040237/ENSDARG00000075819/ENSDARG00000093931/ENSDARG00000019949/ENSDARG00000103467/ENSDARG00000053568/ENSDARG00000040085/ENSDARG00000014577/ENSDARG00000036179/…	53	csrp2/limch1b/hcls1/myot/slc8a1a/fhdc1/rhof/vcla/loxl4/capgb/stmn1b/myo1eb/mef2d/arhgef2b/rflnb/serpinh1b/limk1a/pstpip1b/ccsapb/rhpn2/myo1ea/myom2a/vill/viml/cxcr4a/fam49al/tfpi2/ppp1r9alb//myo1ca/ndel1a/itga3b/fscn2b/mef2aa/itgb5/nostrin/mybpha/mmp9/mical1/marcksl1a/spint1a/myo1f/cracd/dlg1/add2/trpv4/RBM24A/rhogb/p3h4/add3b/nde1/rhoq	csrp2/limch1b/hcls1/myot/slc8a1a/fhdc1/rhof/vcla/loxl4/capgb/stmn1b/myo1eb/mef2d/arhgef2b/rflnb/serpinh1b/limk1a/pstpip1b/ccsapb/rhpn2/myo1ea/myom2a/vill/viml/cxcr4a/fam49al/tfpi2/ppp1r9alb/zgc:158846/limk1b/myo1ca/ndel1a/itga3b/fscn2b/mef2aa/itgb5/nostrin/mybpha/mmp9/mical1/marcksl1a/spint1a/myo1f/cracd/dlg1a/add2/trpv4/rbm24a/rhogb/p3h4/add3b/nde1/rhoq	41	9	53	50
GO:0060326	cell chemotaxis	15/937	62/11544	0.241935	2.98069	4.64767	9.65075e-05	0.0123047	0.0113608	ENSDARG00000102776/ENSDARG00000018569/ENSDARG00000018283/ENSDARG00000067916/ENSDARG00000038541/ENSDARG00000057633/ENSDARG00000045190/ENSDARG00000041107/ENSDARG00000016939/ENSDARG00000044001/ENSDARG00000102332/ENSDARG00000090890/ENSDARG00000061752/ENSDARG00000004301/ENSDARG00000070873	15	/tnfrsf1a/cyba/lyn/ccr12a/cxcr4a/ch25h/cftr/itgb2/lgals3b/spint1a/cmklr1/ripor2/rhogb/ccl25b	cxcl19/tnfrsf1a/cyba/lyn/ccr12a/cxcr4a/ch25h/cftr/itgb2/lgals3b/spint1a/cmklr1/ripor2/rhogb/ccl25b	12	2	15	14
GO:1990266	neutrophil migration	11/937	37/11544	0.297297	3.66275	4.82152	0.000113325	0.013033	0.0120332	ENSDARG00000102776/ENSDARG00000018569/ENSDARG00000018283/ENSDARG00000067916/ENSDARG00000041107/ENSDARG00000079773/ENSDARG00000016939/ENSDARG00000044001/ENSDARG00000102332/ENSDARG00000061752/ENSDARG00000070873	11	/tnfrsf1a/cyba/lyn/cftr/nox5/itgb2/lgals3b/spint1a/ripor2/ccl25b	cxcl19/tnfrsf1a/cyba/lyn/cftr/nox5/itgb2/lgals3b/spint1a/ripor2/ccl25b	8	2	11	10
GO:0009725	response to hormone	28/937	163/11544	0.171779	2.11635	4.26615	0.000113577	0.013033	0.0120332	ENSDARG00000013961/ENSDARG00000102082/ENSDARG00000026081/ENSDARG00000037861/ENSDARG00000037895/ENSDARG00000087832/ENSDARG00000042014/ENSDARG00000035966/ENSDARG00000061121/ENSDARG00000007412/ENSDARG00000059370/ENSDARG00000068910/ENSDARG00000102387/ENSDARG00000032820/ENSDARG00000067976/ENSDARG00000078618/ENSDARG00000061226/ENSDARG00000005185/ENSDARG00000033307/ENSDARG00000062951/ENSDARG00000075282/…	28	slc31a1/nr3c2/lhcgr/slc2a3b/ramp2//cyp11c1/pgr/adgrl3.1/slc2a1b/nr1d4b/nos1/slc39a14/rxfp2a/ar/inpp5kb/timp2a/cpn1/igf2b/meak7/irs2b/nfe2l2a/keap1a/jak3/jak1/ghra/nr5a1a/spata18	slc31a1/nr3c2/lhcgr/slc2a3b/ramp2/bcl3/cyp11c1/pgr/adgrl3.1/slc2a1b/nr1d4b/nos1/slc39a14/rxfp2a/ar/inpp5kb/timp2a/cpn1/igf2b/meak7/irs2b/nfe2l2a/keap1a/jak3/jak1/ghra/nr5a1a/spata18	23	4	28	27
GO:0097530	granulocyte migration	11/937	38/11544	0.289474	3.56637	4.70957	0.000147927	0.0161663	0.0149261	ENSDARG00000102776/ENSDARG00000018569/ENSDARG00000018283/ENSDARG00000067916/ENSDARG00000041107/ENSDARG00000079773/ENSDARG00000016939/ENSDARG00000044001/ENSDARG00000102332/ENSDARG00000061752/ENSDARG00000070873	11	/tnfrsf1a/cyba/lyn/cftr/nox5/itgb2/lgals3b/spint1a/ripor2/ccl25b	cxcl19/tnfrsf1a/cyba/lyn/cftr/nox5/itgb2/lgals3b/spint1a/ripor2/ccl25b	8	2	11	10
GO:0009719	response to endogenous stimulus	57/937	433/11544	0.13164	1.62182	3.91983	0.00017268	0.0180137	0.0166318	ENSDARG00000079306/ENSDARG00000107130/ENSDARG00000013961/ENSDARG00000102082/ENSDARG00000031761/ENSDARG00000026081/ENSDARG00000037861/ENSDARG00000037895/ENSDARG00000087832/ENSDARG00000042014/ENSDARG00000070795/ENSDARG00000000943/ENSDARG00000035966/ENSDARG00000053209/ENSDARG00000062338/ENSDARG00000059337/ENSDARG00000102153/ENSDARG00000061121/ENSDARG00000071491/ENSDARG00000090585/ENSDARG00000038794/…	57	rlim/Nfu_g_1_006350/slc31a1/nr3c2/dab2/lhcgr/slc2a3b/ramp2//cyp11c1/eaf1/dzip1/pgr/smad6a/zeb2a/nrp1a/adgrl3.1/nrros/gpc1b/zgc:113531/slc2a1b/nr1d4b/nos1/slc39a14/rxfp2a/ar/inpp5kb/timp2a/tgfbr3/cpn1/rgma/igf2b/meak7/irs2b/itgb5/nfe2l2a/gnai3/mmp9/id2a/keap1a/fgfr3/bmp4/kdr/jak3/fstl3/jak1/ghra/nr5a1a/ntrk2a/rgmb/gna14a/BMPR1BA/spata18/GNB5/nog1/dusp6	rlim//slc31a1/nr3c2/dab2/lhcgr/slc2a3b/ramp2/bcl3/cyp11c1/eaf1/dzip1/pgr/smad6a/zeb2a/tgif1/nrp1a/adgrl3.1/nrros/gpc1b/zgc:113531/slc2a1b/nr1d4b/nos1/slc39a14/rxfp2a/ar/inpp5kb/timp2a/tgfbr3/cpn1/rgma/igf2b/meak7/irs2b/itgb5/nfe2l2a/gnai3/mmp9/id2a/keap1a/fgfr3/bmp4/kdr/jak3/fstl3/jak1/ghra/nr5a1a/ntrk2a/rgmb/gna14a/bmpr1ba/spata18/gnb5b/nog1/dusp6	45	8	57	53
GO:1901700	response to oxygen-containing compound	34/937	224/11544	0.151786	1.87003	3.9081	0.000272198	0.0271606	0.0250771	ENSDARG00000006865/ENSDARG00000102082/ENSDARG00000044795/ENSDARG00000071091/ENSDARG00000069598/ENSDARG00000102776/ENSDARG00000037861/ENSDARG00000042014/ENSDARG00000003061/ENSDARG00000056587/ENSDARG00000034503/ENSDARG00000077308/ENSDARG00000007412/ENSDARG00000103277/ENSDARG00000068910/ENSDARG00000102387/ENSDARG00000078618/ENSDARG00000016695/ENSDARG00000045066/ENSDARG00000041107/ENSDARG00000033307/…	34	glra4a/nr3c2/entpd2b/chrm3a/chrm5b//slc2a3b/cyp11c1/cd276/cyp2r1/per2/gpr84/slc2a1b/cyp24a1/nos1/slc39a14/inpp5kb/p2rx1/entpd1/cftr/igf2b/meak7/irs2b/adcy5/ptprna/gnai3/chrm5a/brinp3a.2/jak3/jak1/ghra/p2rx2/gna14a/GNB5	glra4a/nr3c2/entpd2b/chrm3a/chrm5b/cxcl19/slc2a3b/cyp11c1/cd276/cyp2r1/per2/gpr84/slc2a1b/cyp24a1/nos1/slc39a14/inpp5kb/p2rx1/entpd1/cftr/igf2b/meak7/irs2b/adcy5/ptprna/gnai3/chrm5a/brinp3a.2/jak3/jak1/ghra/p2rx2/gna14a/gnb5b	28	4	34	32
GO:0006955	immune response	34/937	226/11544	0.150442	1.85348	3.85118	0.00032242	0.0305267	0.0281849	ENSDARG00000091058/ENSDARG00000004433/ENSDARG00000017565/ENSDARG00000100649/ENSDARG00000062489/ENSDARG00000098477/ENSDARG00000036903/ENSDARG00000102776/ENSDARG00000089043/ENSDARG00000018569/ENSDARG00000040251/ENSDARG00000040249/ENSDARG00000068275/ENSDARG00000003061/ENSDARG00000000767/ENSDARG00000071491/ENSDARG00000038541/ENSDARG00000057633/ENSDARG00000044613/ENSDARG00000095627/ENSDARG00000058647/…	34	/btk/itk/tlr1/marchf8/tec/irak1bp1/ptpn6/tnfrsf1a/ctsk/tlr18/ptx3a/cd276/spi1b/nrros/ccr12a/cxcr4a/C1QA/hck/cybc1/cftr/sema7a/tnfsf13b/klhl6/ctsl.1/kita/tcima/cmklr1/tnfrsf21/ccl25b/c7b	sting1/btk/itk/tlr1/marchf8/tec/irak1bp1/cxcl19/ptpn6/tnfrsf1a/ctsk/tlr18/ptx3a/cd276/spi1b/nrros/ccr12a/cxcr4a/c1qa/c1qc/hck/cybc1/cftr/sema7a/tnfsf13b/klhl6/cd40/ctsl.1/kita/tcima/cmklr1/tnfrsf21/ccl25b/c7b	28	2	34	30
GO:0030593	neutrophil chemotaxis	9/937	29/11544	0.310345	3.8235	4.52468	0.000332534	0.0305267	0.0281849	ENSDARG00000102776/ENSDARG00000018569/ENSDARG00000067916/ENSDARG00000041107/ENSDARG00000016939/ENSDARG00000044001/ENSDARG00000102332/ENSDARG00000061752/ENSDARG00000070873	9	/tnfrsf1a/lyn/cftr/itgb2/lgals3b/spint1a/ripor2/ccl25b	cxcl19/tnfrsf1a/lyn/cftr/itgb2/lgals3b/spint1a/ripor2/ccl25b	7	1	9	8
GO:0030595	leukocyte chemotaxis	11/937	42/11544	0.261905	3.22671	4.2967	0.000389574	0.0343874	0.0317495	ENSDARG00000102776/ENSDARG00000018569/ENSDARG00000018283/ENSDARG00000067916/ENSDARG00000045190/ENSDARG00000041107/ENSDARG00000016939/ENSDARG00000044001/ENSDARG00000102332/ENSDARG00000061752/ENSDARG00000070873	11	/tnfrsf1a/cyba/lyn/ch25h/cftr/itgb2/lgals3b/spint1a/ripor2/ccl25b	cxcl19/tnfrsf1a/cyba/lyn/ch25h/cftr/itgb2/lgals3b/spint1a/ripor2/ccl25b	9	1	11	10
GO:0071621	granulocyte chemotaxis	9/937	30/11544	0.3	3.69605	4.39449	0.000441208	0.0375027	0.0346258	ENSDARG00000102776/ENSDARG00000018569/ENSDARG00000067916/ENSDARG00000041107/ENSDARG00000016939/ENSDARG00000044001/ENSDARG00000102332/ENSDARG00000061752/ENSDARG00000070873	9	/tnfrsf1a/lyn/cftr/itgb2/lgals3b/spint1a/ripor2/ccl25b	cxcl19/tnfrsf1a/lyn/cftr/itgb2/lgals3b/spint1a/ripor2/ccl25b	7	1	9	8
GO:0006801	superoxide metabolic process	7/937	19/11544	0.368421	4.53901	4.5885	0.000479093	0.0392685	0.0362561	ENSDARG00000060148/ENSDARG00000040812/ENSDARG00000018283/ENSDARG00000005821/ENSDARG00000033735/ENSDARG00000056615/ENSDARG00000103251	7	sh3pxd2aa/ncf4/cyba/ncf2/ncf1/cybb/sh3pxd2b	sh3pxd2aa/ncf4/cyba/ncf2/ncf1/cybb/sh3pxd2b	7	0	7	7
GO:0007167	enzyme-linked receptor protein signaling pathway	52/937	404/11544	0.128713	1.58576	3.56208	0.000564703	0.0446894	0.0412612	ENSDARG00000079306/ENSDARG00000088195/ENSDARG00000007723/ENSDARG00000107130/ENSDARG00000086778/ENSDARG00000031761/ENSDARG00000078523/ENSDARG00000070795/ENSDARG00000075437/ENSDARG00000000943/ENSDARG00000025504/ENSDARG00000053209/ENSDARG00000062338/ENSDARG00000063032/ENSDARG00000059337/ENSDARG00000102153/ENSDARG00000071491/ENSDARG00000090585/ENSDARG00000038794/ENSDARG00000038666/ENSDARG00000105521/…	52	rlim/si:ch211-168f7.5/efnb1/Nfu_g_1_006350/pdgfba/dab2/ddr1/eaf1/shc1/dzip1/gucy2f/smad6a/zeb2a/dok6//nrp1a/nrros/gpc1b/zgc:113531/igfbp1b/CU570987.1/erbb3a/mst1ra/hck/dok2/inpp5kb/tgfbr3/rgma/igf2b/irs2b/itgb5/mmp9/id2a/fgfr3/bmp4/angptl1a/kita/kdr/jak3/fstl3/tie1/jak1/ghra/ntrk2a/rgmb/BMPR1BA/npr1a/efna1a/ptk2bb/nog1/igfbp5b/dusp6	rlim/si:ch211-168f7.5/efnb1//pdgfba/dab2/ddr1/eaf1/shc1/dzip1/gucy2f/smad6a/zeb2a/dok6/tgif1/nrp1a/nrros/gpc1b/zgc:113531/igfbp1b/si:ch73-40a2.1/erbb3a/mst1ra/hck/dok2/inpp5kb/tgfbr3/rgma/igf2b/irs2b/itgb5/mmp9/id2a/fgfr3/bmp4/angptl1a/kita/kdr/jak3/fstl3/tie1/jak1/ghra/ntrk2a/rgmb/bmpr1ba/npr1a/efna1a/ptk2bb/nog1/igfbp5b/dusp6	41	8	52	49
GO:0008283	cell population proliferation	40/937	290/11544	0.137931	1.69933	3.58478	0.000623786	0.0477196	0.044059	ENSDARG00000027249/ENSDARG00000052615/ENSDARG00000086778/ENSDARG00000074378/ENSDARG00000013441/ENSDARG00000040319/ENSDARG00000038278/ENSDARG00000003061/ENSDARG00000056587/ENSDARG00000059337/ENSDARG00000057633/ENSDARG00000028222/ENSDARG00000078301/ENSDARG00000006202/ENSDARG00000054026/ENSDARG00000094300/ENSDARG00000012824/ENSDARG00000018693/ENSDARG00000101209/ENSDARG00000045802/ENSDARG00000033307/…	40	btg1/tnmd/pdgfba/junba/hey2/c5ar1/ptgir/cd276/cyp2r1//cxcr4a/itgb8/zgc:162255/erbb3a/mustn1a/nupr1a/itga3b/cdh2/LAMB1/hapln3/igf2b/sema3d/wt1a/meak7/tnfsf13b/itgav/mmp9/id2a/fgfr3/bmp4/spint1a/jak3/dlg1/fbn2b/tbx1/npr1a/ptk2bb/tnfrsf21/ccl25b	btg1/tnmd/pdgfba/junba/hey2/c5ar1/ptgir/cd276/cyp2r1/tgif1/cxcr4a/itgb8/zgc:162255/erbb3a/mustn1a/nupr1a/itga3b/cdh2/lamb1a/hapln3/igf2b/sema3d/wt1a/meak7/tnfsf13b/itgav/mmp9/id2a/fgfr3/bmp4/spint1a/jak3/dlg1a/fbn2b/tbx1/npr1a/ptk2bb/kitlga/tnfrsf21/ccl25b	29	7	40	36
GO:0097529	myeloid leukocyte migration	12/937	52/11544	0.230769	2.84312	3.95904	0.000750374	0.0555519	0.0512904	ENSDARG00000027529/ENSDARG00000102776/ENSDARG00000018569/ENSDARG00000018283/ENSDARG00000067916/ENSDARG00000041107/ENSDARG00000079773/ENSDARG00000016939/ENSDARG00000044001/ENSDARG00000102332/ENSDARG00000061752/ENSDARG00000070873	12	hmox1a//tnfrsf1a/cyba/lyn/cftr/nox5/itgb2/lgals3b/spint1a/ripor2/ccl25b	hmox1a/cxcl19/tnfrsf1a/cyba/lyn/cftr/nox5/itgb2/lgals3b/spint1a/ripor2/ccl25b	9	2	12	11
GO:0043207	response to external biotic stimulus	30/937	203/11544	0.147783	1.82071	3.50629	0.000952378	0.0625733	0.0577732	ENSDARG00000091058/ENSDARG00000100649/ENSDARG00000019521/ENSDARG00000062489/ENSDARG00000102776/ENSDARG00000089043/ENSDARG00000018569/ENSDARG00000040249/ENSDARG00000068275/ENSDARG00000103467/ENSDARG00000003061/ENSDARG00000033735/ENSDARG00000077308/ENSDARG00000090615/ENSDARG00000070165/ENSDARG00000068910/ENSDARG00000058647/ENSDARG00000043249/ENSDARG00000045190/ENSDARG00000071414/ENSDARG00000041107/…	30	/tlr1/mpx/marchf8/ptpn6/tnfrsf1a/tlr18/ptx3a/limk1a/cd276/ncf1/gpr84/cd59a/nos1/hck/IRF1B/ch25h/cybc1/cftr/cpt1b/acod1/cebpb/mmp9/bnip3la/rhogb/ccl25b/c7b	sting1/tlr1/mpx/marchf8/cxcl19/ptpn6/tnfrsf1a/tlr18/ptx3a/limk1a/cd276/ncf1/gpr84/cd59a/tnfrsf1b/nos1/hck/irf1b/ch25h/cybc1/cftr/cpt1b/acod1/cd40/cebpb/mmp9/bnip3la/rhogb/ccl25b/c7b	26	0	30	26
GO:0051707	response to other organism	30/937	203/11544	0.147783	1.82071	3.50629	0.000952378	0.0625733	0.0577732	ENSDARG00000091058/ENSDARG00000100649/ENSDARG00000019521/ENSDARG00000062489/ENSDARG00000102776/ENSDARG00000089043/ENSDARG00000018569/ENSDARG00000040249/ENSDARG00000068275/ENSDARG00000103467/ENSDARG00000003061/ENSDARG00000033735/ENSDARG00000077308/ENSDARG00000090615/ENSDARG00000070165/ENSDARG00000068910/ENSDARG00000058647/ENSDARG00000043249/ENSDARG00000045190/ENSDARG00000071414/ENSDARG00000041107/…	30	/tlr1/mpx/marchf8/ptpn6/tnfrsf1a/tlr18/ptx3a/limk1a/cd276/ncf1/gpr84/cd59a/nos1/hck/IRF1B/ch25h/cybc1/cftr/cpt1b/acod1/cebpb/mmp9/bnip3la/rhogb/ccl25b/c7b	sting1/tlr1/mpx/marchf8/cxcl19/ptpn6/tnfrsf1a/tlr18/ptx3a/limk1a/cd276/ncf1/gpr84/cd59a/tnfrsf1b/nos1/hck/irf1b/ch25h/cybc1/cftr/cpt1b/acod1/cd40/cebpb/mmp9/bnip3la/rhogb/ccl25b/c7b	26	0	30	26
GO:0071495	cellular response to endogenous stimulus	51/937	404/11544	0.126238	1.55527	3.37664	0.000990052	0.0625733	0.0577732	ENSDARG00000079306/ENSDARG00000107130/ENSDARG00000013961/ENSDARG00000102082/ENSDARG00000031761/ENSDARG00000026081/ENSDARG00000037895/ENSDARG00000042014/ENSDARG00000070795/ENSDARG00000000943/ENSDARG00000035966/ENSDARG00000053209/ENSDARG00000062338/ENSDARG00000059337/ENSDARG00000102153/ENSDARG00000061121/ENSDARG00000071491/ENSDARG00000090585/ENSDARG00000038794/ENSDARG00000059370/ENSDARG00000068910/…	51	rlim/Nfu_g_1_006350/slc31a1/nr3c2/dab2/lhcgr/ramp2/cyp11c1/eaf1/dzip1/pgr/smad6a/zeb2a//nrp1a/adgrl3.1/nrros/gpc1b/zgc:113531/nr1d4b/nos1/slc39a14/rxfp2a/ar/inpp5kb/tgfbr3/cpn1/rgma/igf2b/irs2b/itgb5/nfe2l2a/gnai3/mmp9/id2a/keap1a/fgfr3/bmp4/kdr/jak3/fstl3/jak1/ghra/nr5a1a/ntrk2a/rgmb/gna14a/BMPR1BA/GNB5/nog1/dusp6	rlim//slc31a1/nr3c2/dab2/lhcgr/ramp2/cyp11c1/eaf1/dzip1/pgr/smad6a/zeb2a/tgif1/nrp1a/adgrl3.1/nrros/gpc1b/zgc:113531/nr1d4b/nos1/slc39a14/rxfp2a/ar/inpp5kb/tgfbr3/cpn1/rgma/igf2b/irs2b/itgb5/nfe2l2a/gnai3/mmp9/id2a/keap1a/fgfr3/bmp4/kdr/jak3/fstl3/jak1/ghra/nr5a1a/ntrk2a/rgmb/gna14a/bmpr1ba/gnb5b/nog1/dusp6	42	6	51	48
GO:0002682	regulation of immune system process	30/937	204/11544	0.147059	1.81179	3.47684	0.00103241	0.0625733	0.0577732	ENSDARG00000091058/ENSDARG00000004433/ENSDARG00000017565/ENSDARG00000100649/ENSDARG00000001452/ENSDARG00000078448/ENSDARG00000027529/ENSDARG00000098477/ENSDARG00000018569/ENSDARG00000040249/ENSDARG00000043241/ENSDARG00000003061/ENSDARG00000000767/ENSDARG00000067916/ENSDARG00000061351/ENSDARG00000044613/ENSDARG00000095627/ENSDARG00000041107/ENSDARG00000078707/ENSDARG00000033307/ENSDARG00000012945/…	30	/btk/itk/tlr1/gpr137ba/hmox1a/tec/tnfrsf1a/tlr18/arrb1/cd276/spi1b/lyn/tfpi2/C1QA/cftr/sema7a/igf2b/tnfsf13b/klhl6/mmp9/kita/ripor2/bcl6ab/tnfrsf21/plvapa/c7b	sting1/btk/itk/tlr1/adam8a/gpr137ba/hmox1a/tec/tnfrsf1a/tlr18/arrb1/cd276/spi1b/lyn/tfpi2/c1qa/c1qc/cftr/sema7a/igf2b/tnfsf13b/klhl6/cd40/mmp9/kita/ripor2/bcl6ab/tnfrsf21/plvapa/c7b	24	2	30	26
GO:0030198	extracellular matrix organization	21/937	125/11544	0.168	2.06979	3.57414	0.00105396	0.0625733	0.0577732	ENSDARG00000041982/ENSDARG00000025089/ENSDARG00000002791/ENSDARG00000008060/ENSDARG00000012467/ENSDARG00000019949/ENSDARG00000059029/ENSDARG00000008388/ENSDARG00000056998/ENSDARG00000077778/ENSDARG00000029124/ENSDARG00000043806/ENSDARG00000026325/ENSDARG00000052437/ENSDARG00000101209/ENSDARG00000006353/ENSDARG00000033950/ENSDARG00000042816/ENSDARG00000102332/ENSDARG00000067549/ENSDARG00000104089	21	adamts6/loxl4/atp1a1a.1/scara3/spint1b/serpinh1b/mmp28/mmp14b/kirrel1b/adamts9/ADAMTS15/postna/mmp11a/mia/LAMB1/itga5/lamb2l/mmp9/spint1a/adamts12/p3h4	adamts6/loxl4/atp1a1a.1/scara3/spint1b/serpinh1b/mmp28/mmp14b/kirrel1b/adamts9/adamts15a/postna/mmp11a/mia/lamb1a/itga5/lamb2l/mmp9/spint1a/adamts12/p3h4	18	1	21	19
GO:0043062	extracellular structure organization	21/937	125/11544	0.168	2.06979	3.57414	0.00105396	0.0625733	0.0577732	ENSDARG00000041982/ENSDARG00000025089/ENSDARG00000002791/ENSDARG00000008060/ENSDARG00000012467/ENSDARG00000019949/ENSDARG00000059029/ENSDARG00000008388/ENSDARG00000056998/ENSDARG00000077778/ENSDARG00000029124/ENSDARG00000043806/ENSDARG00000026325/ENSDARG00000052437/ENSDARG00000101209/ENSDARG00000006353/ENSDARG00000033950/ENSDARG00000042816/ENSDARG00000102332/ENSDARG00000067549/ENSDARG00000104089	21	adamts6/loxl4/atp1a1a.1/scara3/spint1b/serpinh1b/mmp28/mmp14b/kirrel1b/adamts9/ADAMTS15/postna/mmp11a/mia/LAMB1/itga5/lamb2l/mmp9/spint1a/adamts12/p3h4	adamts6/loxl4/atp1a1a.1/scara3/spint1b/serpinh1b/mmp28/mmp14b/kirrel1b/adamts9/adamts15a/postna/mmp11a/mia/lamb1a/itga5/lamb2l/mmp9/spint1a/adamts12/p3h4	18	1	21	19
GO:0044419	biological process involved in interspecies interaction between organisms	31/937	214/11544	0.14486	1.7847	3.44371	0.00110492	0.0625733	0.0577732	ENSDARG00000091058/ENSDARG00000100649/ENSDARG00000096624/ENSDARG00000019521/ENSDARG00000062489/ENSDARG00000102776/ENSDARG00000089043/ENSDARG00000018569/ENSDARG00000040249/ENSDARG00000068275/ENSDARG00000103467/ENSDARG00000003061/ENSDARG00000033735/ENSDARG00000077308/ENSDARG00000090615/ENSDARG00000070165/ENSDARG00000068910/ENSDARG00000058647/ENSDARG00000043249/ENSDARG00000045190/ENSDARG00000071414/…	31	/tlr1/mpx/marchf8/ptpn6/tnfrsf1a/tlr18/ptx3a/limk1a/cd276/ncf1/gpr84/cd59a/nos1/hck/IRF1B/ch25h/cybc1/cftr/cpt1b/acod1/cebpb/mmp9/bnip3la/rhogb/ccl25b/c7b	sting1/tlr1/si:dkey-187i8.2/mpx/marchf8/cxcl19/ptpn6/tnfrsf1a/tlr18/ptx3a/limk1a/cd276/ncf1/gpr84/cd59a/tnfrsf1b/nos1/hck/irf1b/ch25h/cybc1/cftr/cpt1b/acod1/cd40/cebpb/mmp9/bnip3la/rhogb/ccl25b/c7b	26	0	31	26
GO:0030149	sphingolipid catabolic process	6/937	16/11544	0.375	4.62006	4.30658	0.0011076	0.0625733	0.0577732	ENSDARG00000034368/ENSDARG00000053119/ENSDARG00000076058/ENSDARG00000059811/ENSDARG00000061375/ENSDARG00000034817	6	hexb/smpdl3a/gba1/smpd5/sgpl1/asah1b	hexb/smpdl3a/gba1/smpd5/sgpl1/asah1b	5	1	6	6
GO:0046466	membrane lipid catabolic process	6/937	16/11544	0.375	4.62006	4.30658	0.0011076	0.0625733	0.0577732	ENSDARG00000034368/ENSDARG00000053119/ENSDARG00000076058/ENSDARG00000059811/ENSDARG00000061375/ENSDARG00000034817	6	hexb/smpdl3a/gba1/smpd5/sgpl1/asah1b	hexb/smpdl3a/gba1/smpd5/sgpl1/asah1b	5	1	6	6
GO:0045229	external encapsulating structure organization	21/937	126/11544	0.166667	2.05336	3.53346	0.00117051	0.0625733	0.0577732	ENSDARG00000041982/ENSDARG00000025089/ENSDARG00000002791/ENSDARG00000008060/ENSDARG00000012467/ENSDARG00000019949/ENSDARG00000059029/ENSDARG00000008388/ENSDARG00000056998/ENSDARG00000077778/ENSDARG00000029124/ENSDARG00000043806/ENSDARG00000026325/ENSDARG00000052437/ENSDARG00000101209/ENSDARG00000006353/ENSDARG00000033950/ENSDARG00000042816/ENSDARG00000102332/ENSDARG00000067549/ENSDARG00000104089	21	adamts6/loxl4/atp1a1a.1/scara3/spint1b/serpinh1b/mmp28/mmp14b/kirrel1b/adamts9/ADAMTS15/postna/mmp11a/mia/LAMB1/itga5/lamb2l/mmp9/spint1a/adamts12/p3h4	adamts6/loxl4/atp1a1a.1/scara3/spint1b/serpinh1b/mmp28/mmp14b/kirrel1b/adamts9/adamts15a/postna/mmp11a/mia/lamb1a/itga5/lamb2l/mmp9/spint1a/adamts12/p3h4	18	1	21	19
GO:0008202	steroid metabolic process	16/937	85/11544	0.188235	2.31909	3.6278	0.00118596	0.0625733	0.0577732	ENSDARG00000033566/ENSDARG00000040295/ENSDARG00000101145/ENSDARG00000042014/ENSDARG00000079946/ENSDARG00000076058/ENSDARG00000056587/ENSDARG00000103277/ENSDARG00000045190/ENSDARG00000038226/ENSDARG00000089369/ENSDARG00000015709/ENSDARG00000057262/ENSDARG00000079532/ENSDARG00000053966/ENSDARG00000103226	16	cyp17a1/apoeb/lipeb/cyp11c1/sqlea/gba1/cyp2r1/cyp24a1/ch25h//fdxr/hsd17b12a/cyp27a3/zgc:194242/cyp17a2/dhcr7	cyp17a1/apoeb/lipeb/cyp11c1/sqlea/gba1/cyp2r1/cyp24a1/ch25h//fdxr/hsd17b12a/cyp27a3/zgc:194242/cyp17a2/dhcr7	14	1	16	15
GO:0007188	adenylate cyclase-modulating G protein-coupled receptor signaling pathway	23/937	144/11544	0.159722	1.96781	3.47336	0.00126972	0.0625733	0.0577732	ENSDARG00000045708/ENSDARG00000031737/ENSDARG00000042561/ENSDARG00000078605/ENSDARG00000099844/ENSDARG00000026081/ENSDARG00000013968/ENSDARG00000071091/ENSDARG00000069598/ENSDARG00000089292/ENSDARG00000038278/ENSDARG00000052192/ENSDARG00000012353/ENSDARG00000105201/ENSDARG00000017294/ENSDARG00000032820/ENSDARG00000091342/ENSDARG00000006678/ENSDARG00000030644/ENSDARG00000099928/ENSDARG00000013653/…	23	ADM2A/pthlha/lpar2b/ptger1a/GNAZ/lhcgr/psap/chrm3a/chrm5b/adgrl1a/ptgir//vipr2/adcyap1r1a/gnai2b/rxfp2a/adcy5/pth2ra/gnai3/chrm5a/adgrl4/gna14a/calcrla	adm2a/pthlha/lpar2b/ptger1a/GNAZ/lhcgr/psap/chrm3a/chrm5b/adgrl1a/ptgir/s1pr5b/vipr2/adcyap1r1a/gnai2b/rxfp2a/adcy5/pth2ra/gnai3/chrm5a/adgrl4/gna14a/calcrla	19	3	23	22
GO:0006935	chemotaxis	21/937	127/11544	0.165354	2.03719	3.49316	0.00129794	0.0625733	0.0577732	ENSDARG00000076595/ENSDARG00000102776/ENSDARG00000018569/ENSDARG00000040319/ENSDARG00000018283/ENSDARG00000102153/ENSDARG00000067916/ENSDARG00000038541/ENSDARG00000057633/ENSDARG00000045190/ENSDARG00000041107/ENSDARG00000078707/ENSDARG00000017369/ENSDARG00000036571/ENSDARG00000016939/ENSDARG00000044001/ENSDARG00000102332/ENSDARG00000090890/ENSDARG00000061752/ENSDARG00000004301/ENSDARG00000070873	21	sema4ga//tnfrsf1a/c5ar1/cyba/nrp1a/lyn/ccr12a/cxcr4a/ch25h/cftr/sema7a/sema3d/sema3e/itgb2/lgals3b/spint1a/cmklr1/ripor2/rhogb/ccl25b	sema4ga/cxcl19/tnfrsf1a/c5ar1/cyba/nrp1a/lyn/ccr12a/cxcr4a/ch25h/cftr/sema7a/sema3d/sema3e/itgb2/lgals3b/spint1a/cmklr1/ripor2/rhogb/ccl25b	17	3	21	20
GO:0042330	taxis	21/937	127/11544	0.165354	2.03719	3.49316	0.00129794	0.0625733	0.0577732	ENSDARG00000076595/ENSDARG00000102776/ENSDARG00000018569/ENSDARG00000040319/ENSDARG00000018283/ENSDARG00000102153/ENSDARG00000067916/ENSDARG00000038541/ENSDARG00000057633/ENSDARG00000045190/ENSDARG00000041107/ENSDARG00000078707/ENSDARG00000017369/ENSDARG00000036571/ENSDARG00000016939/ENSDARG00000044001/ENSDARG00000102332/ENSDARG00000090890/ENSDARG00000061752/ENSDARG00000004301/ENSDARG00000070873	21	sema4ga//tnfrsf1a/c5ar1/cyba/nrp1a/lyn/ccr12a/cxcr4a/ch25h/cftr/sema7a/sema3d/sema3e/itgb2/lgals3b/spint1a/cmklr1/ripor2/rhogb/ccl25b	sema4ga/cxcl19/tnfrsf1a/c5ar1/cyba/nrp1a/lyn/ccr12a/cxcr4a/ch25h/cftr/sema7a/sema3d/sema3e/itgb2/lgals3b/spint1a/cmklr1/ripor2/rhogb/ccl25b	17	3	21	20
GO:0060914	heart formation	7/937	22/11544	0.318182	3.92005	4.07447	0.0013068	0.0625733	0.0577732	ENSDARG00000002791/ENSDARG00000098952/ENSDARG00000040237/ENSDARG00000006526/ENSDARG00000101209/ENSDARG00000031891/ENSDARG00000017821	7	atp1a1a.1/gata4/mef2d/fn1b/LAMB1/tbx1/gata5	atp1a1a.1/gata4/mef2d/fn1b/lamb1a/tbx1/gata5	6	0	7	6
GO:0032922	circadian regulation of gene expression	8/937	28/11544	0.285714	3.52005	3.96798	0.00130796	0.0625733	0.0577732	ENSDARG00000037421/ENSDARG00000094965/ENSDARG00000034503/ENSDARG00000004060/ENSDARG00000010519/ENSDARG00000102403/ENSDARG00000088549/ENSDARG00000055283	8	egr1/nfil3-5/per2/bhlhe40/per3/cry2/si:ch1073-390k14.1/id2a	egr1/nfil3-5/per2/bhlhe40/per3/cry2/si:ch1073-390k14.1/id2a	7	1	8	8
GO:0009607	response to biotic stimulus	30/937	207/11544	0.144928	1.78553	3.38948	0.00130872	0.0625733	0.0577732	ENSDARG00000091058/ENSDARG00000100649/ENSDARG00000019521/ENSDARG00000062489/ENSDARG00000102776/ENSDARG00000089043/ENSDARG00000018569/ENSDARG00000040249/ENSDARG00000068275/ENSDARG00000103467/ENSDARG00000003061/ENSDARG00000033735/ENSDARG00000077308/ENSDARG00000090615/ENSDARG00000070165/ENSDARG00000068910/ENSDARG00000058647/ENSDARG00000043249/ENSDARG00000045190/ENSDARG00000071414/ENSDARG00000041107/…	30	/tlr1/mpx/marchf8/ptpn6/tnfrsf1a/tlr18/ptx3a/limk1a/cd276/ncf1/gpr84/cd59a/nos1/hck/IRF1B/ch25h/cybc1/cftr/cpt1b/acod1/cebpb/mmp9/bnip3la/rhogb/ccl25b/c7b	sting1/tlr1/mpx/marchf8/cxcl19/ptpn6/tnfrsf1a/tlr18/ptx3a/limk1a/cd276/ncf1/gpr84/cd59a/tnfrsf1b/nos1/hck/irf1b/ch25h/cybc1/cftr/cpt1b/acod1/cd40/cebpb/mmp9/bnip3la/rhogb/ccl25b/c7b	26	0	30	26
GO:0006865	amino acid transport	17/937	95/11544	0.178947	2.20466	3.5041	0.00151473	0.0709452	0.0655029	ENSDARG00000026137/ENSDARG00000017165/ENSDARG00000055226/ENSDARG00000075831/ENSDARG00000063539/ENSDARG00000005894/ENSDARG00000041644/ENSDARG00000074533/ENSDARG00000018621/ENSDARG00000091061/ENSDARG00000098438/ENSDARG00000027065/ENSDARG00000000730/ENSDARG00000061120/ENSDARG00000071235/ENSDARG00000054312/ENSDARG00000043646	17	sfxn5b/slc3a1/slc7a7/slc7a8a/slc25a15a/slc7a9//slc25a38b/slc6a19a.1/slc38a3b/slc6a6b/slc38a3a/slc6a22.1/slc43a2b/si:ch211-117c9.5/slc38a6/slc6a8	sfxn5b/slc3a1/slc7a7/slc7a8a/slc25a15a/slc7a9/cltrn/slc25a38b/slc6a19a.1/slc38a3b/slc6a6b/slc38a3a/slc6a22.1/slc43a2b/si:ch211-117c9.5/slc38a6/slc6a8	15	1	17	16
GO:0001775	cell activation	19/937	112/11544	0.169643	2.09003	3.44523	0.00159076	0.0726306	0.067059	ENSDARG00000030938/ENSDARG00000017565/ENSDARG00000056767/ENSDARG00000043241/ENSDARG00000003061/ENSDARG00000000767/ENSDARG00000102153/ENSDARG00000100700/ENSDARG00000068858/ENSDARG00000041107/ENSDARG00000033307/ENSDARG00000012945/ENSDARG00000043317/ENSDARG00000010252/ENSDARG00000020625/ENSDARG00000079497/ENSDARG00000061752/ENSDARG00000017821/ENSDARG00000001807	19	fermt3b/itk/itgb3a/arrb1/cd276/spi1b/nrp1a/EPS15L1/IL2RGA/cftr/igf2b/tnfsf13b/kita/jak3/jak1/tcima/ripor2/gata5/tnfrsf21	fermt3b/itk/itgb3a/arrb1/cd276/spi1b/nrp1a//il2rga/cftr/igf2b/tnfsf13b/kita/jak3/jak1/tcima/ripor2/gata5/tnfrsf21	15	3	19	18
GO:0035239	tube morphogenesis	59/937	494/11544	0.119433	1.47144	3.18302	0.00161401	0.0726306	0.067059	ENSDARG00000052615/ENSDARG00000107130/ENSDARG00000042561/ENSDARG00000103554/ENSDARG00000086778/ENSDARG00000074635/ENSDARG00000031761/ENSDARG00000034368/ENSDARG00000059832/ENSDARG00000075549/ENSDARG00000009134/ENSDARG00000002791/ENSDARG00000098952/ENSDARG00000013441/ENSDARG00000056642/ENSDARG00000074829/ENSDARG00000037895/ENSDARG00000087369/ENSDARG00000075437/ENSDARG00000000943/ENSDARG00000054632/…	59	tnmd/Nfu_g_1_006350/lpar2b/notch1a/pdgfba/abca1a/dab2/hexb/adgrb3/cdh5/hlx1/atp1a1a.1/gata4/hey2/hdac9b/rasip1/ramp2/KIAA1009/shc1/dzip1/fli1/tnfrsf19/mcamb/nrp1a/per2/gipc2/cxcr4a/itgb8/CU570987.1/trib3/slc2a1b/cldn7b/serpinf1/alox5ap/tgfbr3/cpn1/cdh2/pik3c2a/igf2b/sema3e/itgav/nostrin/plekhg5b/itga5/IQSEC1/marcksl1a/bmp4/angptl1a/kdr/tie1/fbn2b/adgra2/tbx1/RBM24A/calcrla/gata5/prickle1a/tnfrsf2…	tnmd//lpar2b/notch1a/pdgfba/abca1a/dab2/hexb/adgrb3/cdh5/hlx1/atp1a1a.1/gata4/hey2/hdac9b/rasip1/ramp2/cep162/shc1/dzip1/fli1/tnfrsf19/mcamb/nrp1a/per2/gipc2/cxcr4a/itgb8/si:ch73-40a2.1/trib3/slc2a1b/cldn7b/serpinf1/alox5ap/tgfbr3/cpn1/cdh2/pik3c2a/igf2b/sema3e/itgav/nostrin/plekhg5b/itga5/IQSEC1/marcksl1a/bmp4/angptl1a/kdr/tie1/fbn2b/adgra2/tbx1/rbm24a/calcrla/gata5/prickle1a/tnfrsf21/dhfr	49	6	59	55
GO:0042127	regulation of cell population proliferation	29/937	201/11544	0.144279	1.77754	3.30513	0.00167551	0.0733779	0.0677489	ENSDARG00000027249/ENSDARG00000052615/ENSDARG00000086778/ENSDARG00000074378/ENSDARG00000040319/ENSDARG00000038278/ENSDARG00000003061/ENSDARG00000059337/ENSDARG00000006202/ENSDARG00000094300/ENSDARG00000012824/ENSDARG00000018693/ENSDARG00000101209/ENSDARG00000045802/ENSDARG00000033307/ENSDARG00000031420/ENSDARG00000062951/ENSDARG00000012945/ENSDARG00000042816/ENSDARG00000055283/ENSDARG00000004782/…	29	btg1/tnmd/pdgfba/junba/c5ar1/ptgir/cd276//erbb3a/nupr1a/itga3b/cdh2/LAMB1/hapln3/igf2b/wt1a/meak7/tnfsf13b/mmp9/id2a/fgfr3/bmp4/jak3/fbn2b/tbx1/ptk2bb/tnfrsf21/ccl25b	btg1/tnmd/pdgfba/junba/c5ar1/ptgir/cd276/tgif1/erbb3a/nupr1a/itga3b/cdh2/lamb1a/hapln3/igf2b/wt1a/meak7/tnfsf13b/mmp9/id2a/fgfr3/bmp4/jak3/fbn2b/tbx1/ptk2bb/kitlga/tnfrsf21/ccl25b	22	4	29	26
GO:0006952	defense response	32/937	229/11544	0.139738	1.7216	3.27806	0.00169457	0.0733779	0.0677489	ENSDARG00000091058/ENSDARG00000100649/ENSDARG00000078605/ENSDARG00000019521/ENSDARG00000001452/ENSDARG00000062489/ENSDARG00000102776/ENSDARG00000089043/ENSDARG00000018569/ENSDARG00000040249/ENSDARG00000043241/ENSDARG00000038278/ENSDARG00000068275/ENSDARG00000006526/ENSDARG00000071491/ENSDARG00000033735/ENSDARG00000056615/ENSDARG00000090615/ENSDARG00000103308/ENSDARG00000058647/ENSDARG00000043249/…	32	/tlr1/ptger1a/mpx/marchf8/ptpn6/tnfrsf1a/tlr18/arrb1/ptgir/ptx3a/fn1b/nrros/ncf1/cybb/cd59a/mst1/hck/IRF1B/ch25h/cybc1/cftr/sema7a/acod1/mmp9/spint1a/bnip3la/ccl25b/c7b	sting1/tlr1/ptger1a/mpx/adam8a/marchf8/cxcl19/ptpn6/tnfrsf1a/tlr18/arrb1/ptgir/ptx3a/fn1b/nrros/ncf1/cybb/cd59a/mst1/hck/irf1b/ch25h/cybc1/cftr/sema7a/acod1/cd40/mmp9/spint1a/bnip3la/ccl25b/c7b	26	2	32	28
GO:0051180	vitamin transport	7/937	23/11544	0.304348	3.74962	3.92305	0.0017485	0.0738808	0.0682133	ENSDARG00000037861/ENSDARG00000018980/ENSDARG00000007412/ENSDARG00000051874/ENSDARG00000036481/ENSDARG00000102035/ENSDARG00000042859	7	slc2a3b/slc52a3-2b/slc2a1b/stra6/tcn2/slc52a2/slc5a6a	slc2a3b/slc52a3-2b/slc2a1b/stra6/tcn2/slc52a2/slc5a6a	7	0	7	7
GO:0002684	positive regulation of immune system process	19/937	113/11544	0.168142	2.07153	3.40201	0.00177056	0.0738808	0.0682133	ENSDARG00000091058/ENSDARG00000004433/ENSDARG00000017565/ENSDARG00000100649/ENSDARG00000001452/ENSDARG00000098477/ENSDARG00000040249/ENSDARG00000003061/ENSDARG00000044613/ENSDARG00000095627/ENSDARG00000078707/ENSDARG00000033307/ENSDARG00000012945/ENSDARG00000026990/ENSDARG00000054968/ENSDARG00000042816/ENSDARG00000061752/ENSDARG00000076972/ENSDARG00000057121	19	/btk/itk/tlr1/tec/tlr18/cd276/C1QA/sema7a/igf2b/tnfsf13b/klhl6/mmp9/ripor2/plvapa/c7b	sting1/btk/itk/tlr1/adam8a/tec/tlr18/cd276/c1qa/c1qc/sema7a/igf2b/tnfsf13b/klhl6/cd40/mmp9/ripor2/plvapa/c7b	14	1	19	15
GO:0040011	locomotion	36/937	270/11544	0.133333	1.64269	3.17597	0.00208355	0.0853885	0.0788383	ENSDARG00000086778/ENSDARG00000076595/ENSDARG00000001452/ENSDARG00000027529/ENSDARG00000102776/ENSDARG00000018569/ENSDARG00000076058/ENSDARG00000040319/ENSDARG00000041869/ENSDARG00000018283/ENSDARG00000102153/ENSDARG00000067916/ENSDARG00000008388/ENSDARG00000039052/ENSDARG00000038541/ENSDARG00000057633/ENSDARG00000077004/ENSDARG00000060309/ENSDARG00000045190/ENSDARG00000041107/ENSDARG00000078707/…	36	pdgfba/sema4ga//hmox1a/tnfrsf1a/gba1/c5ar1/tnfrsf19/cyba/nrp1a/lyn/mmp14b/klhl40a/ccr12a/cxcr4a/ALDH1L1/srgap3/ch25h/cftr/sema7a/sema3d/sema3e/meak7/itgb2/ildr1b/lgals3b/spint1a/kita/kdr/cmklr1/ripor2/rhogb/ptk2bb/ccl25b/plvapa	pdgfba/sema4ga/adam8a/hmox1a/cxcl19/tnfrsf1a/gba1/c5ar1/tnfrsf19/cyba/nrp1a/lyn/mmp14b/klhl40a/ccr12a/cxcr4a/aldh1l1/srgap3/ch25h/cftr/sema7a/sema3d/sema3e/meak7/itgb2/ildr1b/lgals3b/spint1a/kita/kdr/cmklr1/ripor2/rhogb/ptk2bb/ccl25b/plvapa	30	4	36	34
GO:0009410	response to xenobiotic stimulus	8/937	30/11544	0.266667	3.28538	3.72511	0.00212985	0.0857546	0.0791763	ENSDARG00000026548/ENSDARG00000103295/ENSDARG00000034852/ENSDARG00000027529/ENSDARG00000010250/ENSDARG00000056587/ENSDARG00000042824/ENSDARG00000016132	8	cyp2u1/cyp3a65/nt5c2l1/hmox1a/nqo1/cyp2r1/nfe2l2a/keap1a	cyp2u1/cyp3a65/nt5c2l1/hmox1a/nqo1/cyp2r1/nfe2l2a/keap1a	7	1	8	8
GO:0050878	regulation of body fluid levels	11/937	51/11544	0.215686	2.65729	3.52533	0.00221087	0.0874819	0.0807711	ENSDARG00000101385/ENSDARG00000030938/ENSDARG00000037783/ENSDARG00000071091/ENSDARG00000092470/ENSDARG00000056767/ENSDARG00000037144/ENSDARG00000023713/ENSDARG00000061351/ENSDARG00000041107/ENSDARG00000090524	11	f8/fermt3b/proza/chrm3a/thbd/itgb3a/cpb2/aqp1a.1/tfpi2/cftr/f2rl2	f8/fermt3b/proza/chrm3a/thbd/itgb3a/cpb2/aqp1a.1/tfpi2/cftr/f2rl2	11	0	11	11
GO:0071466	cellular response to xenobiotic stimulus	7/937	24/11544	0.291667	3.59338	3.77989	0.00229786	0.0893828	0.0825262	ENSDARG00000026548/ENSDARG00000034852/ENSDARG00000027529/ENSDARG00000010250/ENSDARG00000056587/ENSDARG00000042824/ENSDARG00000016132	7	cyp2u1/nt5c2l1/hmox1a/nqo1/cyp2r1/nfe2l2a/keap1a	cyp2u1/nt5c2l1/hmox1a/nqo1/cyp2r1/nfe2l2a/keap1a	6	1	7	7
GO:0032870	cellular response to hormone stimulus	21/937	133/11544	0.157895	1.94529	3.25883	0.00233906	0.089469	0.0826057	ENSDARG00000013961/ENSDARG00000102082/ENSDARG00000026081/ENSDARG00000037895/ENSDARG00000042014/ENSDARG00000035966/ENSDARG00000061121/ENSDARG00000059370/ENSDARG00000102387/ENSDARG00000032820/ENSDARG00000067976/ENSDARG00000078618/ENSDARG00000005185/ENSDARG00000033307/ENSDARG00000075282/ENSDARG00000042824/ENSDARG00000016132/ENSDARG00000010252/ENSDARG00000020625/ENSDARG00000054771/ENSDARG00000103176	21	slc31a1/nr3c2/lhcgr/ramp2/cyp11c1/pgr/adgrl3.1/nr1d4b/slc39a14/rxfp2a/ar/inpp5kb/cpn1/igf2b/irs2b/nfe2l2a/keap1a/jak3/jak1/ghra/nr5a1a	slc31a1/nr3c2/lhcgr/ramp2/cyp11c1/pgr/adgrl3.1/nr1d4b/slc39a14/rxfp2a/ar/inpp5kb/cpn1/igf2b/irs2b/nfe2l2a/keap1a/jak3/jak1/ghra/nr5a1a	19	2	21	21
