# Supplementary material
Source: Research Square preprint supplement (doi:10.21203/rs.3.rs-8995976/v1)
Supplement: Supplementary file 5 [file e45ff1911b13a092f31b636f.xlsx]

## Sheet: Sheet 1
baseMean	log2FoldChange	lfcSE	stat	pvalue	padj	ensembl	external_gene_name
124.694	8.25339	1.42673	5.78484	7.25835e-09	4.14599e-08	ENSNFUG00015020032	mymk
67.9113	8.07056	1.70323	4.73839	2.15424e-06	8.37316e-06	ENSNFUG00015023943	comtd1
387.37	7.65523	0.430219	17.7938	7.89224e-71	2.39873e-68	ENSNFUG00015017439	GNB5
105.651	7.1702	1.03783	6.90885	4.88588e-12	4.26445e-11	ENSNFUG00015022614
65.0486	6.9882	1.22148	5.72108	1.05847e-08	5.91863e-08	ENSNFUG00015017121	CLDN14
87.6192	6.81661	0.56126	12.1452	6.08457e-34	3.44318e-32	ENSNFUG00015014456
86.0902	6.80173	0.602385	11.2913	1.44826e-29	6.56035e-28	ENSNFUG00015024587	gna14a
92.1438	6.78327	0.436347	15.5456	1.70486e-54	2.72258e-52	ENSNFUG00015007066	gdf11
166.841	6.36617	0.46425	13.7128	8.50875e-43	7.82141e-41	ENSNFUG00015020181	slc22a13b
285.877	6.34527	0.751689	8.44135	3.13699e-17	4.97587e-16	ENSNFUG00015005529
132.312	6.342	0.476447	13.3111	1.99654e-40	1.6287e-38	ENSNFUG00015017733	rcvrn3
171.981	6.23645	0.920114	6.77792	1.21921e-11	1.01614e-10	ENSNFUG00015016314
253.698	6.16438	0.29978	20.563	5.88761e-94	3.46706e-91	ENSNFUG00015021229	cpb2
201.333	5.90926	0.348867	16.9384	2.34277e-64	5.58824e-62	ENSNFUG00015020656
1305.8	5.90556	0.829353	7.12068	1.07395e-12	1.02262e-11	ENSNFUG00015017177	steap4
619.784	5.76689	0.779022	7.40273	1.33413e-13	1.40214e-12	ENSNFUG00015011977
189.467	5.75318	0.351336	16.3751	2.87873e-60	6.23526e-58	ENSNFUG00015000905
53.553	5.4422	0.438359	12.4149	2.16831e-35	1.32232e-33	ENSNFUG00015000041
1836.39	5.41583	0.189998	28.5047	1.02539e-178	2.14693e-175	ENSNFUG00015015058	cntn1b
1008.91	5.14995	1.00978	5.10009	3.39487e-07	1.50666e-06	ENSNFUG00015010608
991.121	5.08736	0.137728	36.9377	1.14731e-298	7.20665e-295	ENSNFUG00015021771	RAB3A
106.827	5.0853	0.75711	6.71673	1.85853e-11	1.51677e-10	ENSNFUG00015000252	MFAP4
724.39	5.06708	0.567593	8.9273	4.36525e-19	8.49781e-18	ENSNFUG00015005605
1241.14	5.06318	0.0985311	51.3867	0	0	ENSNFUG00015011969	efhc1
89.5165	5.03824	0.589127	8.55204	1.20935e-17	2.02749e-16	ENSNFUG00015022430
200.006	4.98857	0.556774	8.95977	3.25362e-19	6.4133e-18	ENSNFUG00015021537	slc14a2
58.616	4.93843	0.635631	7.76932	7.89064e-15	9.64275e-14	ENSNFUG00015004243	map1lc3cl
174.802	4.86873	0.583004	8.35111	6.76235e-17	1.02932e-15	ENSNFUG00015008595	hk3
1151.49	4.83917	0.529342	9.14186	6.13874e-20	1.29105e-18	ENSNFUG00015003039
295.077	4.74098	0.213801	22.1747	6.02092e-109	5.67291e-106	ENSNFUG00015008647	poli
630.459	4.67259	0.774216	6.03526	1.58711e-09	1.00058e-08	ENSNFUG00015006349	MFAP4
74.1924	4.66667	0.591646	7.88761	3.0803e-15	3.93793e-14	ENSNFUG00015009023
60.9173	4.66584	0.49264	9.4711	2.76914e-21	6.51456e-20	ENSNFUG00015011364	cd59a
186.907	4.65445	0.328873	14.1527	1.79654e-45	1.83989e-43	ENSNFUG00015019285	Nfu_g_1_002684
496.483	4.5737	0.140517	32.549	2.15983e-232	6.78332e-229	ENSNFUG00015013852	ADARB1
68.5458	4.56099	0.91477	4.98594	6.16602e-07	2.61518e-06	ENSNFUG00015011546	msc
70.1914	4.5572	0.525905	8.66544	4.49783e-18	7.95095e-17	ENSNFUG00015003825
2805.73	4.49226	0.528967	8.49252	2.0221e-17	3.29908e-16	ENSNFUG00015022234
76.0898	4.47852	0.647245	6.91936	4.53682e-12	3.98007e-11	ENSNFUG00015005031	lrrc4ba
66.5453	4.43285	0.341106	12.9955	1.29685e-38	9.5835e-37	ENSNFUG00015003625	clcf1
137.122	4.42674	0.369112	11.9929	3.86878e-33	2.08892e-31	ENSNFUG00015011331
3001.19	4.34109	0.141867	30.5996	1.2392e-205	3.33593e-202	ENSNFUG00015003751	gpcpd1
169.391	4.30894	0.226617	19.0142	1.30002e-80	5.32556e-78	ENSNFUG00015004464	cd276
76.2019	4.29153	0.409587	10.4777	1.09376e-25	3.72806e-24	ENSNFUG00015012362	fzd8b
2478.29	4.259	0.570871	7.46054	8.61704e-14	9.28945e-13	ENSNFUG00015002962	si:ch211-256m1.8
546.885	4.10644	0.181118	22.6728	8.31912e-114	8.70919e-111	ENSNFUG00015020974	cep19
664.29	4.01643	0.663469	6.05368	1.41575e-09	8.99779e-09	ENSNFUG00015022546	ARHGAP40
74.2457	3.9944	0.344963	11.5792	5.25128e-31	2.65295e-29	ENSNFUG00015022097	TMEM158
884.015	3.90664	0.471938	8.27788	1.25386e-16	1.86632e-15	ENSNFUG00015014613	Nfu_g_1_012693
221.371	3.8648	0.744117	5.19381	2.06036e-07	9.48813e-07	ENSNFUG00015021100	si:rp71-17i16.5
150.393	3.86424	0.302141	12.7895	1.87577e-37	1.29004e-35	ENSNFUG00015021221	ctdspla
243.833	3.80483	0.870592	4.3704	1.24022e-05	4.24843e-05	ENSNFUG00015007820
60.8502	3.78938	0.769195	4.92643	8.37477e-07	3.47532e-06	ENSNFUG00015024119	p2rx2
526.196	3.75271	0.465732	8.05767	7.7761e-16	1.06492e-14	ENSNFUG00015005643	cybb
97.3508	3.7453	0.21704	17.2563	1.00408e-66	2.62789e-64	ENSNFUG00015025162	grid1b
278.399	3.67447	0.572214	6.4215	1.3494e-10	9.83296e-10	ENSNFUG00015009109
357.348	3.67432	0.639477	5.74582	9.14772e-09	5.15798e-08	ENSNFUG00015018923
193.741	3.67416	0.387126	9.49087	2.29111e-21	5.43748e-20	ENSNFUG00015014856
107.814	3.66677	0.653999	5.60669	2.06228e-08	1.0981e-07	ENSNFUG00015010762	ppp1r14aa
117.476	3.66595	0.283679	12.9229	3.34353e-38	2.39565e-36	ENSNFUG00015022849	nt5c1ab
114.999	3.63892	0.251976	14.4415	2.83526e-47	3.31849e-45	ENSNFUG00015018981	znf362a
393.338	3.58165	0.520037	6.88729	5.68663e-12	4.92911e-11	ENSNFUG00015013412	ptx3a
61.5175	3.57926	0.479703	7.4614	8.56082e-14	9.23941e-13	ENSNFUG00015005544	serpinf1
124.733	3.57867	0.37383	9.573	1.03845e-21	2.55797e-20	ENSNFUG00015024057
93.6376	3.56743	0.2206	16.1715	8.01698e-59	1.54155e-56	ENSNFUG00015001658	slc2a3b
215.378	3.54672	0.183324	19.3467	2.17112e-83	1.04904e-80	ENSNFUG00015016478	slc25a48
328.057	3.53484	0.146661	24.102	2.38001e-128	2.80305e-125	ENSNFUG00015018209	mst1
383.928	3.5008	0.461689	7.58259	3.38712e-14	3.85428e-13	ENSNFUG00015024327	inpp5kb
287.221	3.49043	0.498251	7.00537	2.46341e-12	2.24362e-11	ENSNFUG00015019009
469.787	3.45825	0.689012	5.01914	5.19021e-07	2.22637e-06	ENSNFUG00015015239
115.238	3.45314	0.561498	6.14987	7.75469e-10	5.10585e-09	ENSNFUG00015013624
86.0057	3.453	0.469375	7.3566	1.88654e-13	1.95329e-12	ENSNFUG00015020764	mss51
62.8641	3.41605	0.431199	7.9222	2.3335e-15	3.02841e-14	ENSNFUG00015006619	il13ra2
299.374	3.40171	0.245999	13.8281	1.72446e-43	1.6167e-41	ENSNFUG00015015152	CDH4
102.675	3.39405	0.859988	3.94662	7.92614e-05	0.000237155	ENSNFUG00015007824
129.262	3.37202	0.280188	12.0348	2.33078e-33	1.27678e-31	ENSNFUG00015015766	cps1
443.554	3.37026	0.122274	27.563	3.08765e-167	5.81838e-164	ENSNFUG00015018089	si:dkeyp-19e1.3
236.275	3.35317	0.474135	7.07218	1.52518e-12	1.42775e-11	ENSNFUG00015012644	Nfu_g_1_012109
212.897	3.35233	0.184345	18.1851	6.77554e-74	2.5035e-71	ENSNFUG00015013868
58.0266	3.3429	0.413492	8.08457	6.23849e-16	8.62495e-15	ENSNFUG00015023543
160.707	3.30317	0.5323	6.20546	5.45368e-10	3.68612e-09	ENSNFUG00015020392	GGT5
92.1422	3.27008	0.467844	6.98968	2.75504e-12	2.49357e-11	ENSNFUG00015013589	alox5ap
90.6809	3.24757	0.486655	6.67325	2.50203e-11	2.00973e-10	ENSNFUG00015006356	OXER1
848.123	3.24571	0.233753	13.8852	7.78986e-44	7.45138e-42	ENSNFUG00015016559	plat
160.021	3.2382	0.199382	16.2412	2.5773e-59	5.11228e-57	ENSNFUG00015010191	ecel1
1661.36	3.23525	0.438586	7.37655	1.6245e-13	1.69502e-12	ENSNFUG00015016623	mpx
609.121	3.2324	0.56412	5.72998	1.0044e-08	5.62964e-08	ENSNFUG00015009888	rgs13b
417.399	3.23162	0.422312	7.6522	1.97569e-14	2.31673e-13	ENSNFUG00015023573
108.814	3.22904	0.25971	12.4332	1.72489e-35	1.05876e-33	ENSNFUG00015020519
215.683	3.22033	0.493284	6.52834	6.65027e-11	5.05517e-10	ENSNFUG00015012267
64.6037	3.21408	0.262128	12.2615	1.45798e-34	8.55891e-33	ENSNFUG00015020702	fam49al
55.3001	3.1949	0.491274	6.50329	7.85798e-11	5.89709e-10	ENSNFUG00015018294	cpne4b
153.89	3.18186	0.52104	6.10676	1.01675e-09	6.5863e-09	ENSNFUG00015009541	gpr84
216.113	3.16765	0.363757	8.70813	3.08937e-18	5.53911e-17	ENSNFUG00015003119
57.6986	3.14648	0.416763	7.54981	4.35907e-14	4.88071e-13	ENSNFUG00015004132
234.008	3.1414	0.185374	16.9462	2.05158e-64	4.95641e-62	ENSNFUG00015018959	cyp24a1
78.1381	3.13294	0.499006	6.27837	3.42147e-10	2.37562e-09	ENSNFUG00015000767	col28a2b
54.3648	3.11779	0.255725	12.192	3.4306e-34	1.97695e-32	ENSNFUG00015000336	pla2g10
1896.68	3.10429	0.424771	7.30816	2.70815e-13	2.772e-12	ENSNFUG00015014875
211.412	3.10049	0.286369	10.8269	2.56748e-27	1.00239e-25	ENSNFUG00015022987	nr1d4b
293.812	3.09943	0.47247	6.56005	5.37887e-11	4.14389e-10	ENSNFUG00015014700
360.906	3.07645	0.457612	6.72285	1.78201e-11	1.45684e-10	ENSNFUG00015021759	stoml3b
261.279	3.07372	0.266181	11.5475	7.60123e-31	3.76941e-29	ENSNFUG00015005713	camkvl
85.2815	3.07204	0.330256	9.302	1.37833e-20	3.04493e-19	ENSNFUG00015000763
1027.25	3.06866	0.184945	16.5923	7.9227e-62	1.75641e-59	ENSNFUG00015001391	si:ch211-79k12.1
206.811	3.06353	0.364293	8.40954	4.11636e-17	6.44794e-16	ENSNFUG00015008054	mmp28
99.4475	3.05115	0.448065	6.80962	9.7858e-12	8.23966e-11	ENSNFUG00015014191	acod1
249.66	3.04541	0.420064	7.24986	4.17198e-13	4.19514e-12	ENSNFUG00015022871	NRCAM
187.44	3.04539	0.250745	12.1454	6.0713e-34	3.44318e-32	ENSNFUG00015005511	tnca
629.801	3.03044	0.197466	15.3467	3.72954e-53	5.49059e-51	ENSNFUG00015009964	gabrb2a
445.876	3.02817	0.310143	9.76379	1.61018e-22	4.23775e-21	ENSNFUG00015018375	got1
760.286	3.01702	0.410696	7.34611	2.04058e-13	2.107e-12	ENSNFUG00015020436
77.8306	2.98671	0.287877	10.375	3.22286e-25	1.073e-23	ENSNFUG00015018236	mybpha
153.545	2.9842	0.212073	14.0715	5.6826e-45	5.60644e-43	ENSNFUG00015009134
6192.44	2.97365	0.384169	7.74048	9.90407e-15	1.1979e-13	ENSNFUG00015001215	cyp17a1
150.912	2.96395	0.41056	7.2193	5.22555e-13	5.1881e-12	ENSNFUG00015003355	efemp1
62.8188	2.95671	0.347076	8.51891	1.61066e-17	2.66007e-16	ENSNFUG00015024543	ppp1r9alb
512.705	2.94437	0.488476	6.02766	1.66349e-09	1.04489e-08	ENSNFUG00015009718
53.5975	2.93489	0.260469	11.2677	1.89471e-29	8.46066e-28	ENSNFUG00015021160	vill
604.193	2.91654	0.201322	14.4869	1.46566e-47	1.73703e-45	ENSNFUG00015007278
273.06	2.91439	0.484034	6.02105	1.7329e-09	1.0838e-08	ENSNFUG00015008534	ncf1
75.3468	2.9044	0.268271	10.8264	2.58109e-27	1.00492e-25	ENSNFUG00015008374	itm2cb
414.078	2.90126	0.223501	12.981	1.56869e-38	1.14133e-36	ENSNFUG00015016297	ITGA11
73.3166	2.88556	0.400502	7.20484	5.81116e-13	5.72727e-12	ENSNFUG00015023735	adgrl1a
391.067	2.8835	0.585862	4.92181	8.5747e-07	3.55281e-06	ENSNFUG00015014706
115.224	2.87106	0.437013	6.56973	5.04057e-11	3.8992e-10	ENSNFUG00015020375
346.804	2.86577	0.801773	3.57429	0.000351178	0.000919623	ENSNFUG00015002339
135.194	2.86316	0.324306	8.82856	1.06032e-18	1.9822e-17	ENSNFUG00015012364
1081.81	2.86298	0.511693	5.59512	2.20469e-08	1.16996e-07	ENSNFUG00015003449
59.5957	2.86233	1.03193	2.77377	0.00554112	0.011165	ENSNFUG00015009172
58.9192	2.86228	0.570745	5.01498	5.30385e-07	2.27253e-06	ENSNFUG00015009881	cabp5a
417.393	2.85381	0.219732	12.9877	1.43735e-38	1.05802e-36	ENSNFUG00015023248	IGFBP3
324.267	2.82421	0.343725	8.21649	2.09542e-16	3.07046e-15	ENSNFUG00015020662	slc46a2
64.1781	2.81933	0.44965	6.27005	3.60932e-10	2.49501e-09	ENSNFUG00015011249	rap1gapb
120.595	2.81432	0.221501	12.7057	5.49792e-37	3.62247e-35	ENSNFUG00015000875	si:ch1073-416j23.1
69.692	2.80603	0.311425	9.01029	2.05508e-19	4.12417e-18	ENSNFUG00015003708	aipl2
120.605	2.80415	0.274235	10.2253	1.5269e-24	4.81153e-23	ENSNFUG00015017310	hmox1a
55.1661	2.8	0.410808	6.81583	9.37242e-12	7.92702e-11	ENSNFUG00015003167
53.2362	2.79957	0.562374	4.97814	6.41994e-07	2.71356e-06	ENSNFUG00015010830	pnp5a
255.982	2.79718	0.596317	4.69076	2.72196e-06	1.04021e-05	ENSNFUG00015017688
173.062	2.79694	0.289657	9.65602	4.63519e-22	1.16928e-20	ENSNFUG00015013424	Nfu_g_1_013830
329.343	2.77771	0.33343	8.33071	8.03576e-17	1.21663e-15	ENSNFUG00015011799	lnx1
288.269	2.77653	0.519582	5.34378	9.10273e-08	4.40729e-07	ENSNFUG00015015383	c7b
169.686	2.76558	0.155224	17.8168	5.23905e-71	1.61844e-68	ENSNFUG00015017929	NPC1L1
51.7904	2.74757	0.510634	5.38071	7.41911e-08	3.64552e-07	ENSNFUG00015018130	si:ch211-236l14.4
97.1125	2.74662	0.270443	10.156	3.11635e-24	9.487e-23	ENSNFUG00015012631	eloal
673.223	2.74584	0.160715	17.0852	1.9138e-65	4.87347e-63	ENSNFUG00015001876	stard15
638.285	2.72986	0.259359	10.5254	6.5993e-26	2.30718e-24	ENSNFUG00015006273	cftr
331.443	2.72754	0.288483	9.45476	3.23773e-21	7.59797e-20	ENSNFUG00015002769	slc7a9
60.999	2.71856	0.579521	4.69105	2.71803e-06	1.03892e-05	ENSNFUG00015014552	crym
135.442	2.71685	0.229563	11.8349	2.57774e-32	1.35306e-30	ENSNFUG00015006696
846.687	2.70729	0.548376	4.93692	7.93652e-07	3.30656e-06	ENSNFUG00015004212	vwa11
534.978	2.70506	0.384633	7.03284	2.02369e-12	1.86022e-11	ENSNFUG00015003070	SLC26A3
159.832	2.69336	0.189744	14.1947	9.87583e-46	1.03389e-43	ENSNFUG00015017679
187.227	2.68974	0.409978	6.5607	5.35563e-11	4.12767e-10	ENSNFUG00015017295	cmklr1
99.6629	2.68957	0.272545	9.86834	5.71021e-23	1.56628e-21	ENSNFUG00015007252
149.983	2.6789	0.364545	7.34861	2.00272e-13	2.07017e-12	ENSNFUG00015017781	RASGEF1B
111.576	2.67161	0.272736	9.7956	1.17599e-22	3.13887e-21	ENSNFUG00015001430	hdac9b
202.134	2.65879	0.217834	12.2056	2.90157e-34	1.68756e-32	ENSNFUG00015001559
194.604	2.65197	0.337385	7.86036	3.83028e-15	4.85341e-14	ENSNFUG00015021650	sema3e
427.742	2.64705	0.522952	5.06175	4.15424e-07	1.81672e-06	ENSNFUG00015018516	gpnmb
71.6833	2.64289	0.362274	7.29529	2.98026e-13	3.03732e-12	ENSNFUG00015003181
584.69	2.6403	0.186182	14.1813	1.19643e-45	1.232e-43	ENSNFUG00015000279	arhgap32a
53.6536	2.633	0.349831	7.52649	5.21213e-14	5.77749e-13	ENSNFUG00015003089	si:ch211-152f2.1
77.9019	2.61995	0.345826	7.57591	3.56626e-14	4.03619e-13	ENSNFUG00015021088	myo1hb
162.347	2.61597	0.298987	8.74945	2.14403e-18	3.89605e-17	ENSNFUG00015020102	nog1
115.163	2.60416	0.621554	4.18975	2.79262e-05	9.02798e-05	ENSNFUG00015008822	GLUL
160.092	2.60397	0.414033	6.28928	3.18945e-10	2.22107e-09	ENSNFUG00015012689
56.2324	2.59087	0.229809	11.274	1.76338e-29	7.93058e-28	ENSNFUG00015004413	APOH
75.3251	2.57458	0.370217	6.95426	3.54421e-12	3.15034e-11	ENSNFUG00015017352	FILIP1L
211.658	2.57242	0.322914	7.96629	1.63507e-15	2.16524e-14	ENSNFUG00015012376
395.9	2.56842	0.152037	16.8934	5.03178e-64	1.18523e-61	ENSNFUG00015002999
333.784	2.56554	0.245421	10.4536	1.41057e-25	4.77213e-24	ENSNFUG00015007369	cyp3a65
324.673	2.56396	0.51427	4.98563	6.17617e-07	2.61831e-06	ENSNFUG00015007488	acy3.1
243.613	2.5602	0.499763	5.12282	3.01006e-07	1.35019e-06	ENSNFUG00015023469	snx10b
212.094	2.55744	0.305159	8.38068	5.26231e-17	8.13478e-16	ENSNFUG00015018682
71.1836	2.54843	0.557595	4.57039	4.86813e-06	1.78925e-05	ENSNFUG00015004073	b3gnt2l
103.801	2.54094	0.34118	7.44751	9.51211e-14	1.01384e-12	ENSNFUG00015005410	lyn
377.083	2.53594	0.390056	6.50148	7.95349e-11	5.96639e-10	ENSNFUG00015014348	TP53I3
668.742	2.5184	0.281634	8.94209	3.81869e-19	7.47242e-18	ENSNFUG00015006055
78.6202	2.51696	0.843737	2.98311	0.00285332	0.00613649	ENSNFUG00015002021
243.204	2.50358	0.501127	4.9959	5.85613e-07	2.48991e-06	ENSNFUG00015011316	mmp25b
55.2358	2.4956	0.313322	7.96499	1.65244e-15	2.18669e-14	ENSNFUG00015024175	ttc39a
114.298	2.49038	0.174792	14.2476	4.63645e-46	4.90838e-44	ENSNFUG00015018583	marchf8
100.872	2.48187	0.179036	13.8624	1.06996e-43	1.01318e-41	ENSNFUG00015010896	MDGA2
57.1263	2.48023	0.318529	7.78649	6.88946e-15	8.45765e-14	ENSNFUG00015018148
103.974	2.47348	0.31746	7.79149	6.6223e-15	8.14561e-14	ENSNFUG00015010695	cav4b
321.263	2.47277	0.28629	8.63728	5.75668e-18	1.00258e-16	ENSNFUG00015019346	pik3ip1
227.279	2.46414	0.431859	5.70589	1.1574e-08	6.41849e-08	ENSNFUG00015022721	tat
409.173	2.45921	0.242877	10.1253	4.26581e-24	1.28002e-22	ENSNFUG00015006670	slc28a1
631.799	2.45135	0.156037	15.7101	1.28954e-55	2.16965e-53	ENSNFUG00015022873	apol1
208.049	2.45015	0.471138	5.2005	1.9875e-07	9.16829e-07	ENSNFUG00015021948
113.155	2.44881	0.384868	6.36273	1.98196e-10	1.42062e-09	ENSNFUG00015003201	ppef1
170.459	2.44698	0.548947	4.45759	8.28877e-06	2.92497e-05	ENSNFUG00015020528	pros1
136.156	2.44562	0.356929	6.85183	7.29123e-12	6.24527e-11	ENSNFUG00015017810
80.2373	2.43597	0.286374	8.50625	1.79649e-17	2.95402e-16	ENSNFUG00015019483	tlr18
195.409	2.43174	0.126316	19.2513	1.37705e-82	6.17838e-80	ENSNFUG00015019214	itih3b.1
577.659	2.42493	0.237131	10.2261	1.51469e-24	4.78104e-23	ENSNFUG00015013708
52.8134	2.42061	0.272781	8.87381	7.06829e-19	1.33999e-17	ENSNFUG00015006825	sox4b
76.0706	2.41683	0.486858	4.96415	6.90029e-07	2.90503e-06	ENSNFUG00015013966	GNAZ
288.808	2.40719	0.262888	9.15671	5.35024e-20	1.13536e-18	ENSNFUG00015018272	cspg5b
58.732	2.40706	0.259598	9.27227	1.82232e-20	3.99299e-19	ENSNFUG00015016254	trpc4a
59.1516	2.40554	0.449233	5.35477	8.56657e-08	4.16482e-07	ENSNFUG00015005265	ctsl.1
472.045	2.39866	0.357391	6.7116	1.92507e-11	1.56835e-10	ENSNFUG00015014419	hecw2a
86.1431	2.39815	0.63427	3.78096	0.000156224	0.000441893	ENSNFUG00015002188	rasd2b
77.4567	2.39716	0.246735	9.71553	2.58905e-22	6.72011e-21	ENSNFUG00015009530	NIPAL2
2701.17	2.38969	0.166222	14.3765	7.27019e-47	8.20356e-45	ENSNFUG00015023661	fstl3
479.532	2.3831	0.147729	16.1316	1.53011e-58	2.91247e-56	ENSNFUG00015010645	ccnd1
193.918	2.37803	0.249732	9.52231	1.69367e-21	4.07604e-20	ENSNFUG00015016590
80.1587	2.37138	0.225326	10.5242	6.68142e-26	2.33157e-24	ENSNFUG00015022344
345.773	2.3708	0.267006	8.87923	6.73273e-19	1.27766e-17	ENSNFUG00015014253
114.406	2.37016	0.253577	9.34691	9.02454e-21	2.0221e-19	ENSNFUG00015015943	prickle1b
104.029	2.36642	0.232672	10.1706	2.68183e-24	8.20398e-23	ENSNFUG00015011033	UNC119B
420.751	2.35826	0.366566	6.43339	1.24788e-10	9.1179e-10	ENSNFUG00015014614	MARCO
672.097	2.35762	0.27842	8.46788	2.49901e-17	4.03179e-16	ENSNFUG00015002822
175.411	2.35638	0.187865	12.543	4.34479e-36	2.72911e-34	ENSNFUG00015015701
74.2818	2.35526	0.373288	6.30948	2.79966e-10	1.9656e-09	ENSNFUG00015020581
160.653	2.35455	0.388668	6.05801	1.37818e-09	8.7738e-09	ENSNFUG00015014834
1088.29	2.35159	0.432181	5.44121	5.29202e-08	2.65573e-07	ENSNFUG00015011449	aqp1a.1
251.48	2.33366	0.255339	9.13943	6.27817e-20	1.3189e-18	ENSNFUG00015002543	chrm5b
1110.91	2.33305	0.146769	15.8961	6.74298e-57	1.18752e-54	ENSNFUG00015003197	nqo1
365.909	2.32799	0.206962	11.2484	2.35862e-29	1.04825e-27	ENSNFUG00015001691	FAM160A1
335.638	2.32793	0.431019	5.40099	6.6274e-08	3.28304e-07	ENSNFUG00015004493
345.861	2.3251	0.16527	14.0684	5.93629e-45	5.82622e-43	ENSNFUG00015012413	ptn
109.687	2.31515	0.368702	6.27918	3.4037e-10	2.36414e-09	ENSNFUG00015006158	Nfu_g_1_018518
60.7217	2.3118	0.302382	7.6453	2.08459e-14	2.43534e-13	ENSNFUG00015002858
853.081	2.31101	0.20066	11.5171	1.08206e-30	5.32387e-29	ENSNFUG00015015397	pygl
103.842	2.31092	0.182633	12.6534	1.07181e-36	6.89326e-35	ENSNFUG00015016040	Nfu_g_1_018478
65.6	2.30485	0.454936	5.06632	4.05578e-07	1.77779e-06	ENSNFUG00015012931
155.183	2.29933	0.269669	8.5265	1.5084e-17	2.49774e-16	ENSNFUG00015024480
385.477	2.2959	0.40302	5.69674	1.2212e-08	6.74452e-08	ENSNFUG00015010382	Nfu_g_1_022803
150.661	2.29467	0.247358	9.27674	1.74736e-20	3.8332e-19	ENSNFUG00015008517
604.616	2.2874	0.344748	6.635	3.24492e-11	2.57137e-10	ENSNFUG00015001743
112.85	2.28344	0.328359	6.95408	3.54877e-12	3.1529e-11	ENSNFUG00015024098	gal3st1a
546.664	2.28139	0.253584	8.99656	2.329e-19	4.64911e-18	ENSNFUG00015007847	slc22a7b.2
178.28	2.2744	0.411035	5.53336	3.14151e-08	1.63262e-07	ENSNFUG00015011256	bcl6b
213.019	2.27135	0.368921	6.15673	7.42631e-10	4.90678e-09	ENSNFUG00015009326	osr2
581.596	2.27033	0.289054	7.85435	4.01854e-15	5.07203e-14	ENSNFUG00015012740	CSF3R
2306.23	2.26852	0.175562	12.9215	3.40591e-38	2.4311e-36	ENSNFUG00015024526
57.0631	2.26167	0.263627	8.57906	9.56478e-18	1.62524e-16	ENSNFUG00015024005
360.984	2.25965	0.317787	7.11057	1.15566e-12	1.09599e-11	ENSNFUG00015003037	phospho1
411.993	2.2494	0.393865	5.7111	1.12249e-08	6.24327e-08	ENSNFUG00015018539	nherf4b
169.029	2.24527	0.28635	7.841	4.46969e-15	5.62262e-14	ENSNFUG00015016808	si:dkey-178e17.3
203.901	2.24407	0.205979	10.8947	1.22207e-27	4.87897e-26	ENSNFUG00015003837	sall3a
53.363	2.24242	0.451238	4.96948	6.71328e-07	2.82819e-06	ENSNFUG00015010558	erbb3a
172.502	2.23843	0.149682	14.9546	1.45343e-50	1.92877e-48	ENSNFUG00015002211	tubb5
293.575	2.23025	0.485839	4.59051	4.42166e-06	1.63344e-05	ENSNFUG00015015241	CDH6
139.557	2.22785	0.614738	3.62407	0.000290001	0.000772626	ENSNFUG00015008007	lect2.2
118.063	2.22392	0.42695	5.20886	1.90005e-07	8.78638e-07	ENSNFUG00015005263	tbx1
100.591	2.21993	0.299501	7.41208	1.24333e-13	1.31184e-12	ENSNFUG00015013450
158.762	2.20958	0.273888	8.06743	7.17924e-16	9.86766e-15	ENSNFUG00015009442
246.437	2.20656	0.29509	7.47759	7.57002e-14	8.23136e-13	ENSNFUG00015007305
303.343	2.19781	0.242026	9.08089	1.07689e-19	2.20575e-18	ENSNFUG00015000580
64.3485	2.19591	0.203349	10.7987	3.48965e-27	1.34202e-25	ENSNFUG00015018315
55.6811	2.19051	0.281893	7.77071	7.80486e-15	9.54412e-14	ENSNFUG00015021065	itih3a.1
72.8722	2.18949	0.240733	9.0951	9.44957e-20	1.9461e-18	ENSNFUG00015015291	elovl8b
307.914	2.18708	0.180907	12.0895	1.19984e-33	6.68077e-32	ENSNFUG00015013240
351.14	2.18695	0.258489	8.46052	2.66183e-17	4.26164e-16	ENSNFUG00015011338	slc2a1b
59.0403	2.18469	0.410058	5.32775	9.94361e-08	4.78492e-07	ENSNFUG00015003098	sema4ga
102.354	2.18251	0.393125	5.55169	2.82914e-08	1.47925e-07	ENSNFUG00015002433	slc47a3
107.253	2.18136	0.426228	5.11782	3.09082e-07	1.3828e-06	ENSNFUG00015016608	slc38a3a
147.217	2.17892	0.265552	8.20525	2.30111e-16	3.35361e-15	ENSNFUG00015016302	SNAI2
72.1261	2.17814	0.290776	7.49078	6.84677e-14	7.50119e-13	ENSNFUG00015011394	CABZ01074899.1
65.9225	2.17643	0.333932	6.51758	7.14501e-11	5.38778e-10	ENSNFUG00015012523
99.8829	2.17125	0.272812	7.95877	1.73754e-15	2.29609e-14	ENSNFUG00015023382	mical1
1703.66	2.1661	0.215999	10.0283	1.14483e-23	3.31386e-22	ENSNFUG00015019301	THBS1
868.384	2.16609	0.15217	14.2347	5.58105e-46	5.87538e-44	ENSNFUG00015010484
552.059	2.16539	0.250148	8.65643	4.8679e-18	8.56496e-17	ENSNFUG00015011418	synm
485.981	2.15423	0.128173	16.8071	2.1635e-63	5.0332e-61	ENSNFUG00015001231	cerk
91.2844	2.15352	0.323042	6.66639	2.62176e-11	2.10053e-10	ENSNFUG00015012561
73.8527	2.15285	0.311566	6.90978	4.85411e-12	4.23869e-11	ENSNFUG00015004963	IGFBP4
87.2569	2.15175	0.241263	8.91868	4.71868e-19	9.13888e-18	ENSNFUG00015018358
333.151	2.14823	0.243228	8.83217	1.0266e-18	1.92108e-17	ENSNFUG00015022927	bmp4
60.3909	2.14428	0.255302	8.399	4.50309e-17	7.01291e-16	ENSNFUG00015000824
97.4237	2.14152	0.340358	6.29195	3.13513e-10	2.18566e-09	ENSNFUG00015018988
360.256	2.14052	0.247023	8.6653	4.50336e-18	7.95327e-17	ENSNFUG00015009452	add3b
327.994	2.13758	0.388382	5.50381	3.7166e-08	1.9101e-07	ENSNFUG00015019155	LBP
59.0694	2.136	0.244007	8.75384	2.0622e-18	3.76917e-17	ENSNFUG00015016531
206.502	2.1333	0.270257	7.8936	2.93587e-15	3.7712e-14	ENSNFUG00015004211
77.7498	2.132	0.208226	10.2389	1.32804e-24	4.21306e-23	ENSNFUG00015024751	gsg1l2b
456.039	2.12831	0.263373	8.08098	6.42491e-16	8.86966e-15	ENSNFUG00015014559
823.771	2.12765	0.157126	13.5411	8.94933e-42	7.77148e-40	ENSNFUG00015010368	sema7a
141.013	2.12479	0.243068	8.74155	2.29926e-18	4.1701e-17	ENSNFUG00015018783	pth2ra
217.349	2.12295	0.208566	10.1788	2.46503e-24	7.57764e-23	ENSNFUG00015006403
51.0427	2.12095	0.305048	6.95284	3.5801e-12	3.17774e-11	ENSNFUG00015011574	tmem187
169.356	2.11764	0.31281	6.76974	1.2901e-11	1.07237e-10	ENSNFUG00015004593
355.439	2.11553	0.220376	9.59963	8.02324e-22	1.99459e-20	ENSNFUG00015019774	tnfrsf21
65.8141	2.115	0.229521	9.21486	3.11684e-20	6.70477e-19	ENSNFUG00015003074
354.944	2.10745	0.142222	14.8181	1.11975e-49	1.42571e-47	ENSNFUG00015025293	sdk2b
301.024	2.10391	0.217482	9.67395	3.89076e-22	9.8944e-21	ENSNFUG00015007461	mmp14b
385.288	2.10268	0.494012	4.25633	2.07808e-05	6.87369e-05	ENSNFUG00015017923	si:ch1073-390k14.1
94.6893	2.10122	0.217408	9.66485	4.25226e-22	1.07556e-20	ENSNFUG00015001210	prlra
234.257	2.09911	0.155188	13.5262	1.09564e-41	9.47074e-40	ENSNFUG00015019375	si:ch211-120g10.1
233.274	2.09886	0.307934	6.81594	9.3651e-12	7.92438e-11	ENSNFUG00015014600	myo1ea
252.651	2.08648	0.34676	6.01707	1.77604e-09	1.10893e-08	ENSNFUG00015018683
96.1192	2.08395	0.304597	6.84164	7.82914e-12	6.68171e-11	ENSNFUG00015017210	igfbp5b
95.73	2.08391	0.334503	6.22988	4.66807e-10	3.19061e-09	ENSNFUG00015010560	zgc:152891
66.2101	2.08255	0.280597	7.42185	1.15497e-13	1.22271e-12	ENSNFUG00015000465	proca1
97.9725	2.08185	0.27014	7.70657	1.29241e-14	1.54728e-13	ENSNFUG00015018494	kcnip3b
69.0023	2.07936	0.40527	5.13079	2.8853e-07	1.29639e-06	ENSNFUG00015002346	mtmr7a
152.379	2.07606	0.291027	7.13355	9.78103e-13	9.36078e-12	ENSNFUG00015008323	glula
59.6289	2.07575	0.360699	5.75478	8.67521e-09	4.90771e-08	ENSNFUG00015015912	fam20a
92.4804	2.07375	0.801777	2.58644	0.00969717	0.0184356	ENSNFUG00015004702	cldn7b
1489.25	2.07292	0.122075	16.9807	1.14063e-64	2.79143e-62	ENSNFUG00015019154
4613.34	2.06791	0.212566	9.72833	2.283e-22	5.95857e-21	ENSNFUG00015001509	apoeb
258.565	2.05873	0.108221	19.0233	1.09295e-80	4.57681e-78	ENSNFUG00015002914
114.491	2.05857	0.248136	8.29613	1.07555e-16	1.60982e-15	ENSNFUG00015000571	MFNG
388.612	2.05598	0.211881	9.70347	2.91425e-22	7.51248e-21	ENSNFUG00015021711	dgat1a
179.792	2.04817	0.272515	7.5158	5.65636e-14	6.23324e-13	ENSNFUG00015014286	Nfu_g_1_012085
556.258	2.04811	0.405389	5.05221	4.36735e-07	1.90329e-06	ENSNFUG00015008045	hsd3b2
206.499	2.04634	0.290581	7.04224	1.89174e-12	1.74744e-11	ENSNFUG00015015947	slc48a1b
52.6569	2.04046	0.35361	5.77035	7.91056e-09	4.50216e-08	ENSNFUG00015024870	prickle2a
2516.24	2.03743	0.20347	10.0134	1.33073e-23	3.82259e-22	ENSNFUG00015008140	hipk3b
55.6035	2.03301	0.242352	8.38869	4.91575e-17	7.64294e-16	ENSNFUG00015015630	si:dkeyp-69b9.3
87.9298	2.03188	0.353672	5.7451	9.18668e-09	5.17839e-08	ENSNFUG00015014983	si:dkeyp-86f7.4
144.825	2.02552	0.218341	9.27683	1.74588e-20	3.8332e-19	ENSNFUG00015005328	pdgfba
2523.09	2.02314	0.340106	5.94856	2.70519e-09	1.64282e-08	ENSNFUG00015002311	clu
88.0116	2.02073	0.187088	10.801	3.40518e-27	1.31221e-25	ENSNFUG00015010256	stra6
123.255	2.01482	0.334063	6.03124	1.62705e-09	1.0244e-08	ENSNFUG00015023954	SPI1
77.5906	2.01261	0.195363	10.3019	6.90836e-25	2.2445e-23	ENSNFUG00015007181
204.996	2.01251	0.188009	10.7044	9.71089e-27	3.65175e-25	ENSNFUG00015007140	renbp
981.046	2.01201	0.525095	3.83171	0.000127255	0.000366722	ENSNFUG00015001764	qdpra
51.3943	2.01169	0.294581	6.82899	8.55173e-12	7.26223e-11	ENSNFUG00015007459	FOXQ1
79.7855	2.00681	0.385014	5.21231	1.865e-07	8.63279e-07	ENSNFUG00015018722	mapk8ip2
53.431	2.00181	0.341956	5.85401	4.79861e-09	2.81435e-08	ENSNFUG00015018081	tiam1a
393.708	1.99783	0.447852	4.46092	8.16092e-06	2.8831e-05	ENSNFUG00015016322	flnca
232.4	1.99636	0.225316	8.86025	7.98384e-19	1.50598e-17	ENSNFUG00015010436	il12rb2
878.684	1.99398	0.171666	11.6154	3.4405e-31	1.74282e-29	ENSNFUG00015013241	itga3b
94.4615	1.99338	0.295025	6.75664	1.41228e-11	1.17083e-10	ENSNFUG00015023074
259.809	1.99268	0.343465	5.8017	6.56451e-09	3.77024e-08	ENSNFUG00015013703	hck
75.6019	1.99238	0.242521	8.21526	2.11703e-16	3.09971e-15	ENSNFUG00015007208	slc38a3b
217.261	1.98749	0.294306	6.75315	1.44666e-11	1.19723e-10	ENSNFUG00015024757	spns3
119.159	1.98734	0.294675	6.74417	1.53905e-11	1.26978e-10	ENSNFUG00015020755	fzd8a
55.8361	1.98603	0.300203	6.61562	3.69987e-11	2.90865e-10	ENSNFUG00015016850	lratd2a
118.114	1.98336	0.33413	5.9359	2.92243e-09	1.76734e-08	ENSNFUG00015020228
58.2753	1.97969	0.20409	9.70007	3.01304e-22	7.75651e-21	ENSNFUG00015022001	ndufa4b
104.849	1.97943	0.195402	10.13	4.06597e-24	1.22395e-22	ENSNFUG00015016218
155.633	1.97816	0.20547	9.62746	6.12229e-22	1.53415e-20	ENSNFUG00015004713	PPARG
147.328	1.97735	0.39885	4.95763	7.13569e-07	2.9981e-06	ENSNFUG00015018847	si:dkey-183j2.10
111.205	1.97493	0.367282	5.37714	7.56783e-08	3.71375e-07	ENSNFUG00015016633
380.251	1.97441	0.390898	5.05095	4.39611e-07	1.91494e-06	ENSNFUG00015016924	ncf2
229.417	1.97405	0.381322	5.17686	2.25656e-07	1.03085e-06	ENSNFUG00015005163	lhcgr
151.6	1.97403	0.299092	6.60007	4.10965e-11	3.21471e-10	ENSNFUG00015016162
89.7734	1.97377	0.319954	6.16892	6.87587e-10	4.57841e-09	ENSNFUG00015021714	RND1
480.059	1.9721	0.349011	5.65053	1.59957e-08	8.65907e-08	ENSNFUG00015002376	gapdh
50.1866	1.97143	0.369276	5.33863	9.36509e-08	4.5285e-07	ENSNFUG00015018351	RBM24A
224.267	1.97013	0.149668	13.1634	1.42593e-39	1.11034e-37	ENSNFUG00015015356	adcyap1r1a
74.1916	1.96858	0.401582	4.90206	9.4836e-07	3.90621e-06	ENSNFUG00015002406	cldn5b
1113.94	1.96598	0.109083	18.0228	1.29122e-72	4.50588e-70	ENSNFUG00015011135	CABLES2
924.635	1.96523	0.120703	16.2815	1.33554e-59	2.76559e-57	ENSNFUG00015001765
66.5292	1.96331	0.228793	8.58114	9.39359e-18	1.59903e-16	ENSNFUG00015015504	mapk12b
59.426	1.96258	0.490795	3.99878	6.36704e-05	0.000193486	ENSNFUG00015017149	MAP7
57.6535	1.96152	0.379679	5.16627	2.3881e-07	1.08594e-06	ENSNFUG00015022746
208.195	1.95832	0.504128	3.88457	0.000102512	0.000301315	ENSNFUG00015024760
920.929	1.95629	0.13325	14.6813	8.49495e-49	1.03277e-46	ENSNFUG00015018565
112.021	1.95304	0.313888	6.22211	4.90509e-10	3.34291e-09	ENSNFUG00015002859
146.445	1.95281	0.291378	6.70196	2.05637e-11	1.66955e-10	ENSNFUG00015018384	f2rl2
97.8643	1.94701	0.357709	5.44301	5.23887e-08	2.63186e-07	ENSNFUG00015006487	junba
126.87	1.94692	0.31594	6.1623	7.16976e-10	4.75227e-09	ENSNFUG00015004586
87.6991	1.94467	0.295012	6.59182	4.34464e-11	3.39289e-10	ENSNFUG00015020717	cyp2r1
454.332	1.94209	0.194019	10.0098	1.38049e-23	3.95348e-22	ENSNFUG00015006578	pgr
70.5915	1.93833	0.312783	6.19706	5.75278e-10	3.87577e-09	ENSNFUG00015009546	EGFR
123.869	1.93831	0.392452	4.93896	7.85395e-07	3.27361e-06	ENSNFUG00015008868	Nfu_g_1_019538
215.944	1.93759	0.340499	5.69045	1.26708e-08	6.98153e-08	ENSNFUG00015016632
85.3783	1.93138	0.231839	8.33068	8.03816e-17	1.21663e-15	ENSNFUG00015013546	mmp11a
1026.55	1.92943	0.174055	11.0852	1.48065e-28	6.32684e-27	ENSNFUG00015012784	FABP6
164.485	1.92938	0.210902	9.1482	5.78881e-20	1.22155e-18	ENSNFUG00015006978	adcy5
51.5896	1.92857	0.240141	8.031	9.6685e-16	1.31358e-14	ENSNFUG00015015833
76.9036	1.92812	0.444935	4.3335	1.46757e-05	4.96766e-05	ENSNFUG00015008782	adamts6
285.4	1.92745	0.150702	12.7898	1.8687e-37	1.28988e-35	ENSNFUG00015000157	IGSF9B
63.14	1.92426	0.293275	6.56126	5.33534e-11	4.11371e-10	ENSNFUG00015014908
136.473	1.92356	0.266847	7.20847	5.65857e-13	5.58566e-12	ENSNFUG00015018074	AVPR1A
512.219	1.92113	0.257847	7.45064	9.28876e-14	9.91713e-13	ENSNFUG00015008426	si:ch1073-406l10.2
207.552	1.9194	0.471182	4.07358	4.62955e-05	0.000144412	ENSNFUG00015003351	LYZ
61.0336	1.91306	0.195318	9.79457	1.18803e-22	3.16651e-21	ENSNFUG00015021785	parvb
189.556	1.90608	0.285602	6.6739	2.49094e-11	2.00253e-10	ENSNFUG00015017977	ampd3b
971.524	1.90455	0.245007	7.77344	7.63805e-15	9.35227e-14	ENSNFUG00015004619
58.6415	1.90248	0.354013	5.37403	7.69955e-08	3.7725e-07	ENSNFUG00015008261	DLK1
460.509	1.90045	0.444703	4.27353	1.92399e-05	6.39767e-05	ENSNFUG00015014398
64.6491	1.89795	0.619346	3.06444	0.00218078	0.00482729	ENSNFUG00015007891	glmnb
542.035	1.89541	0.17505	10.8278	2.54138e-27	9.95628e-26	ENSNFUG00015013203	mafba
167.704	1.89219	0.27566	6.86421	6.68602e-12	5.75566e-11	ENSNFUG00015008593
628.458	1.89126	0.193494	9.77422	1.45277e-22	3.84493e-21	ENSNFUG00015017938
84.0177	1.88426	0.452152	4.16732	3.08201e-05	9.89731e-05	ENSNFUG00015021180	chrm5a
69.3698	1.88219	0.196183	9.59402	8.47195e-22	2.09784e-20	ENSNFUG00015005303	trpt1
86.3535	1.882	0.259982	7.23896	4.52154e-13	4.52971e-12	ENSNFUG00015007552	SLC22A23
245.747	1.87968	0.346087	5.43124	5.59632e-08	2.79505e-07	ENSNFUG00015002425	slc2a6
1154.73	1.87937	0.0908181	20.6937	3.94474e-95	2.39789e-92	ENSNFUG00015003333	irak1bp1
261.529	1.87811	0.222835	8.42824	3.5089e-17	5.52857e-16	ENSNFUG00015015699	rhogb
103.15	1.8742	0.234279	7.99988	1.24541e-15	1.66917e-14	ENSNFUG00015003078	arhgap22a
66.4213	1.87398	0.369675	5.06926	3.99373e-07	1.75467e-06	ENSNFUG00015023586
162.386	1.86694	0.415734	4.4907	7.09899e-06	2.53407e-05	ENSNFUG00015002316	scara3
61.269	1.86564	0.30289	6.15948	7.29837e-10	4.82902e-09	ENSNFUG00015011020
355.851	1.86514	0.535931	3.4802	0.000501046	0.00127058	ENSNFUG00015015344	olfm4l2
68.7158	1.86219	0.263083	7.07831	1.4592e-12	1.36938e-11	ENSNFUG00015023042	sntg2
95.9679	1.86085	0.395844	4.70096	2.58943e-06	9.92982e-06	ENSNFUG00015013498	rxfp2a
56.0353	1.8603	0.217892	8.53775	1.36861e-17	2.27827e-16	ENSNFUG00015013488	kita
175.467	1.85559	0.241594	7.68061	1.58334e-14	1.88179e-13	ENSNFUG00015013400	veph1
127.097	1.85557	0.353958	5.24236	1.58533e-07	7.4208e-07	ENSNFUG00015011280	nos1
97.9561	1.85399	0.236497	7.83937	4.52797e-15	5.69213e-14	ENSNFUG00015017150	ANO8
65.6307	1.85317	0.438673	4.22448	2.39491e-05	7.84317e-05	ENSNFUG00015019007	mast1a
88.7852	1.85104	0.181237	10.2134	1.72746e-24	5.38944e-23	ENSNFUG00015006664	msx2b
407.255	1.84567	0.53235	3.46702	0.000526267	0.00132775	ENSNFUG00015010583
220.405	1.84102	0.329264	5.59132	2.2535e-08	1.19451e-07	ENSNFUG00015010616	ADAP1
53.252	1.83693	0.429818	4.27374	1.9222e-05	6.39287e-05	ENSNFUG00015018144	igf2b
1099.37	1.83692	0.11669	15.7419	7.8066e-56	1.33734e-53	ENSNFUG00015008215	dhh
143.593	1.83484	0.263601	6.96068	3.38628e-12	3.01707e-11	ENSNFUG00015024613	rapgef4b
955.243	1.83406	0.16334	11.2285	2.95388e-29	1.30053e-27	ENSNFUG00015010268	gsta.2
104.697	1.81854	0.2104	8.64327	5.46267e-18	9.54902e-17	ENSNFUG00015005156	dlg4a
53.8743	1.81818	0.520413	3.49373	0.000476317	0.00121343	ENSNFUG00015022813	dhrs3b
73.7381	1.81703	0.334168	5.43746	5.40441e-08	2.70709e-07	ENSNFUG00015015226
83.342	1.81597	0.392211	4.63007	3.6554e-06	1.36807e-05	ENSNFUG00015023830	CYP19A1
139.216	1.81498	0.241082	7.52846	5.13409e-14	5.70777e-13	ENSNFUG00015024970	fzd10
101.135	1.81171	0.272819	6.64071	3.12172e-11	2.48315e-10	ENSNFUG00015022923	wnt2ba
5709.24	1.81021	0.240764	7.51862	5.53583e-14	6.11115e-13	ENSNFUG00015010015
304.892	1.8101	0.543488	3.33053	0.000866816	0.0020979	ENSNFUG00015015326	olmf4l1
121.957	1.80682	0.2204	8.19793	2.44566e-16	3.54508e-15	ENSNFUG00015018817	syt7b
83.5384	1.80483	0.265	6.81068	9.7141e-12	8.1866e-11	ENSNFUG00015018958	fam83e
322.362	1.80434	0.141631	12.7398	3.55456e-37	2.36686e-35	ENSNFUG00015005034	kcnj1b
619.171	1.80382	0.375381	4.80531	1.54511e-06	6.13488e-06	ENSNFUG00015014457	cyp17a2
52.8686	1.79949	0.511278	3.51959	0.000432219	0.00111146	ENSNFUG00015016099	oclnb
91.2227	1.79707	0.328136	5.47659	4.33599e-08	2.20654e-07	ENSNFUG00015002568
879.057	1.79622	0.237351	7.56775	3.79739e-14	4.28747e-13	ENSNFUG00015014725
155.292	1.79592	0.196029	9.16149	5.1184e-20	1.08984e-18	ENSNFUG00015016274
80.3729	1.79385	0.325139	5.51719	3.44472e-08	1.77891e-07	ENSNFUG00015021143	bicdl1
72.2323	1.79101	0.301607	5.93821	2.88148e-09	1.74425e-08	ENSNFUG00015004117	Nfu_g_1_016892
621.314	1.79016	0.251671	7.1131	1.13465e-12	1.07932e-11	ENSNFUG00015004968
412.668	1.78872	0.424431	4.21439	2.50454e-05	8.1639e-05	ENSNFUG00015013079	cpe
89.5987	1.78721	0.281812	6.34187	2.2699e-10	1.61351e-09	ENSNFUG00015021213	cmya5
440.851	1.78621	0.132594	13.4713	2.30749e-41	1.95867e-39	ENSNFUG00015002220	ADCY9
90.3257	1.78553	0.307509	5.80643	6.38174e-09	3.67198e-08	ENSNFUG00015000697	Nfu_g_1_018191
53.3404	1.78288	0.433629	4.11154	3.93024e-05	0.000124285	ENSNFUG00015008525	stac
509.154	1.78277	0.247477	7.20377	5.85711e-13	5.76955e-12	ENSNFUG00015023205	pgap4
91.2006	1.78187	0.316019	5.6385	1.71537e-08	9.23294e-08	ENSNFUG00015013418	tcima
110.756	1.7801	0.322734	5.51569	3.47411e-08	1.79359e-07	ENSNFUG00015021091	tm4sf18
170.678	1.77894	0.203982	8.72106	2.75621e-18	4.96065e-17	ENSNFUG00015018561	trpc6a
300.241	1.77814	0.0933341	19.0513	6.40575e-81	2.74341e-78	ENSNFUG00015004141	f8
116.799	1.77609	0.269467	6.59111	4.36537e-11	3.40626e-10	ENSNFUG00015007993	SLC39A1
983.296	1.77526	0.219545	8.08607	6.16208e-16	8.52557e-15	ENSNFUG00015020095	plpp2a
2957.78	1.77446	0.072244	24.5621	3.21285e-133	4.3245e-130	ENSNFUG00015000626	slc29a1a
66.4262	1.76778	0.334646	5.28255	1.27395e-07	6.05606e-07	ENSNFUG00015013443	dpp6a
97.5964	1.76718	0.211004	8.37512	5.51661e-17	8.50696e-16	ENSNFUG00015021500
81.7883	1.76618	0.180291	9.79626	1.16827e-22	3.12269e-21	ENSNFUG00015019062
71.637	1.76243	0.381709	4.61721	3.88935e-06	1.44891e-05	ENSNFUG00015019392	dusp8a
166.412	1.76139	0.379089	4.64636	3.37838e-06	1.2707e-05	ENSNFUG00015012765	egr1
124.79	1.75933	0.292611	6.01254	1.8264e-09	1.13751e-08	ENSNFUG00015004742	nmrk2
332.251	1.7593	0.180049	9.77122	1.49635e-22	3.95474e-21	ENSNFUG00015002595	si:ch73-22o12.1
51.6805	1.75867	0.231277	7.60417	2.86732e-14	3.2886e-13	ENSNFUG00015006702	tmem198ab
348.891	1.75565	0.181128	9.69287	3.23299e-22	8.28878e-21	ENSNFUG00015013552	fhdc4
65.2069	1.75514	0.302518	5.80179	6.56109e-09	3.76943e-08	ENSNFUG00015008927
64.3244	1.75415	0.371622	4.72025	2.35553e-06	9.1014e-06	ENSNFUG00015010329	ptgir
156.262	1.75363	0.292027	6.00504	1.91286e-09	1.18924e-08	ENSNFUG00015024545	ednraa
106.014	1.74792	0.186884	9.35299	8.52062e-21	1.91831e-19	ENSNFUG00015009087	eepd1
74.0821	1.74789	0.443923	3.93736	8.2382e-05	0.000245789	ENSNFUG00015022876
379.624	1.74743	0.115309	15.1544	7.09069e-52	9.75307e-50	ENSNFUG00015000099
63.5382	1.74594	0.293543	5.94783	2.71725e-09	1.64961e-08	ENSNFUG00015006080	FOXA1
300.372	1.74229	0.27211	6.40288	1.52473e-10	1.10593e-09	ENSNFUG00015007618	scg3
153.43	1.74028	0.305419	5.69801	1.21212e-08	6.69842e-08	ENSNFUG00015020608	ccdc85al
308.089	1.73804	0.551026	3.15419	0.00160942	0.00367344	ENSNFUG00015009734	CKM
63.1469	1.7376	0.227689	7.63147	2.32096e-14	2.6981e-13	ENSNFUG00015023422
62.8209	1.73694	0.377479	4.60144	4.19584e-06	1.55459e-05	ENSNFUG00015013881	gpr184
77.503	1.73486	0.194973	8.89795	5.68887e-19	1.08952e-17	ENSNFUG00015004625
549.722	1.73428	0.186392	9.3045	1.34623e-20	2.981e-19	ENSNFUG00015008795	gpm6bb
190.38	1.73082	0.211701	8.17577	2.93985e-16	4.21603e-15	ENSNFUG00015007025	nfil3-5
2583.71	1.7304	0.183484	9.43079	4.06999e-21	9.43356e-20	ENSNFUG00015022264	slc4a4b
479.207	1.72985	0.137165	12.6114	1.82659e-36	1.17076e-34	ENSNFUG00015003019	zgc:154058
95.4732	1.72821	0.178668	9.67274	3.9369e-22	9.99824e-21	ENSNFUG00015012583
57.9045	1.72636	0.239388	7.21157	5.53092e-13	5.46537e-12	ENSNFUG00015023730	iqsec2a
71.0257	1.72563	0.501288	3.4424	0.000576576	0.0014477	ENSNFUG00015015868	trpv1
541.996	1.72393	0.221356	7.78805	6.80518e-15	8.35964e-14	ENSNFUG00015001213
676.642	1.72264	0.42176	4.08441	4.41893e-05	0.000138599	ENSNFUG00015014913	itgb2
168.059	1.72226	0.511424	3.36757	0.000758347	0.00185685	ENSNFUG00015000960
88.3057	1.7217	0.259372	6.63796	3.18061e-11	2.52679e-10	ENSNFUG00015024317	abch1
462.741	1.72058	0.259238	6.63705	3.20016e-11	2.53804e-10	ENSNFUG00015019166	ndrg1a
121.614	1.71968	0.18844	9.12589	7.11466e-20	1.48142e-18	ENSNFUG00015006909	znf512
549.737	1.71632	0.394914	4.34606	1.38607e-05	4.7121e-05	ENSNFUG00015006267	vcam1b
62.0839	1.71501	0.396945	4.32053	1.55658e-05	5.24539e-05	ENSNFUG00015020613	ldlrb
121.082	1.7128	0.235132	7.28443	3.23031e-13	3.28328e-12	ENSNFUG00015025290	tie1
57.8974	1.71163	0.426969	4.00879	6.10309e-05	0.000185974	ENSNFUG00015007477	tgfb5
92.3279	1.71156	0.245462	6.97282	3.10643e-12	2.78221e-11	ENSNFUG00015019350
124.487	1.70973	0.349293	4.89484	9.83846e-07	4.03913e-06	ENSNFUG00015019311	sla1a
1241.26	1.70959	0.112195	15.2377	1.98767e-52	2.81622e-50	ENSNFUG00015001139	clstn3
293.634	1.70339	0.210969	8.07414	6.79553e-16	9.3676e-15	ENSNFUG00015012333	tuft1a
633.35	1.70164	0.170944	9.95435	2.4139e-23	6.7892e-22	ENSNFUG00015020704	slc43a2a
67.7864	1.70123	0.499071	3.4088	0.000652504	0.00161983	ENSNFUG00015006396
297.857	1.70068	0.217071	7.83466	4.70104e-15	5.89006e-14	ENSNFUG00015010189	fyb1b
475.734	1.69942	0.136541	12.4462	1.46621e-35	9.0588e-34	ENSNFUG00015018103	arsh
94.929	1.69938	0.277445	6.1251	9.06252e-10	5.91323e-09	ENSNFUG00015005620	st6galnac1.1
113.953	1.69876	0.154642	10.9851	4.50591e-28	1.85797e-26	ENSNFUG00015001505	mri1
79.0198	1.69746	0.165322	10.2676	9.86692e-25	3.15674e-23	ENSNFUG00015000228
286.53	1.69602	0.310035	5.47043	4.48949e-08	2.27848e-07	ENSNFUG00015014467	gstr
189.888	1.69355	0.176867	9.57526	1.01599e-21	2.50593e-20	ENSNFUG00015011284
163.897	1.69257	0.125389	13.4986	1.59469e-41	1.36593e-39	ENSNFUG00015024724
806.555	1.69141	0.156011	10.8416	2.18572e-27	8.58079e-26	ENSNFUG00015008746	orc3
85.958	1.69067	0.274092	6.16826	6.9044e-10	4.59415e-09	ENSNFUG00015009884	ghra
212.631	1.69031	0.443579	3.81061	0.000138622	0.000396869	ENSNFUG00015015577	ntd5
1575.49	1.68811	0.165121	10.2235	1.55622e-24	4.89573e-23	ENSNFUG00015005936
267.717	1.68771	0.26437	6.3839	1.72637e-10	1.24356e-09	ENSNFUG00015020063	ccl25b
513.163	1.68212	0.183792	9.15227	5.57499e-20	1.18172e-18	ENSNFUG00015009092
54.877	1.68135	0.321437	5.23072	1.68848e-07	7.87255e-07	ENSNFUG00015022657	arid5a
74.4502	1.67811	0.349368	4.80327	1.56096e-06	6.18737e-06	ENSNFUG00015018495	EEF1A1
206.603	1.67688	0.306863	5.4646	4.63957e-08	2.35085e-07	ENSNFUG00015005274	CU570987.1
52.5925	1.67621	0.207622	8.07337	6.83822e-16	9.40579e-15	ENSNFUG00015005337	CABZ01002626.1
370.912	1.67619	0.231499	7.24061	4.46656e-13	4.47701e-12	ENSNFUG00015017667
55.8673	1.67293	0.325749	5.13565	2.8117e-07	1.26543e-06	ENSNFUG00015024947	PRRT3
586.778	1.66944	0.21161	7.88925	3.04006e-15	3.89177e-14	ENSNFUG00015019551	nrp1a
62.222	1.66868	0.251671	6.63042	3.34736e-11	2.64699e-10	ENSNFUG00015016127	MAP3K12
540.483	1.66714	0.215244	7.74535	9.53187e-15	1.15585e-13	ENSNFUG00015024209	slc43a2b
157.255	1.66556	0.23837	6.98729	2.80244e-12	2.53403e-11	ENSNFUG00015012831	BX004812.1
901.061	1.66395	0.192708	8.63455	5.89607e-18	1.02441e-16	ENSNFUG00015023142
66.4269	1.66187	0.196322	8.46505	2.56035e-17	4.10964e-16	ENSNFUG00015006130	cln3
67.9269	1.65427	0.322066	5.13643	2.80009e-07	1.26051e-06	ENSNFUG00015024109
367.753	1.65082	0.242967	6.79444	1.08737e-11	9.09474e-11	ENSNFUG00015000258
134.611	1.65077	0.298781	5.52501	3.29459e-08	1.70652e-07	ENSNFUG00015024087	itga6b
301.968	1.65075	0.124003	13.3122	1.96655e-40	1.6112e-38	ENSNFUG00015014649	ptprna
267.097	1.6472	0.308979	5.33112	9.76088e-08	4.70179e-07	ENSNFUG00015018809
267.294	1.64635	0.191425	8.60049	7.93751e-18	1.36349e-16	ENSNFUG00015023520	ppargc1a
66.2973	1.64443	0.564219	2.91453	0.00356223	0.00749683	ENSNFUG00015007172
122.786	1.64276	0.293501	5.59712	2.17941e-08	1.15752e-07	ENSNFUG00015018433	MPEG1
125.104	1.64175	0.196507	8.3547	6.5599e-17	1.00093e-15	ENSNFUG00015024893	chst15
79.936	1.64072	0.243596	6.73543	1.63445e-11	1.3432e-10	ENSNFUG00015022440
805.145	1.64056	0.271655	6.03912	1.54959e-09	9.80209e-09	ENSNFUG00015022599	IRF1B
16302.4	1.64037	0.17137	9.57205	1.04803e-21	2.57821e-20	ENSNFUG00015009674
56.2668	1.64028	0.191031	8.58646	8.96883e-18	1.52811e-16	ENSNFUG00015015479	bin1a
508.396	1.63849	0.453646	3.61183	0.000304047	0.000806853	ENSNFUG00015005660	CR847523.1
89.4935	1.63782	0.301639	5.42975	5.6433e-08	2.81583e-07	ENSNFUG00015001558	mfap5
55.1408	1.63417	0.334554	4.88461	1.03635e-06	4.24357e-06	ENSNFUG00015013070
96.1313	1.63379	0.246317	6.63287	3.29212e-11	2.60658e-10	ENSNFUG00015014968	hspb8
160.108	1.63296	0.135334	12.0661	1.59442e-33	8.78514e-32	ENSNFUG00015022292	rpz2
267.646	1.63218	0.250306	6.52071	6.9975e-11	5.29349e-10	ENSNFUG00015013605
106.762	1.63198	0.253066	6.44884	1.12709e-10	8.2835e-10	ENSNFUG00015019803
355.498	1.63062	0.19379	8.41436	3.95031e-17	6.2033e-16	ENSNFUG00015015176
994.803	1.63003	0.264388	6.16529	7.03551e-10	4.67315e-09	ENSNFUG00015014709
111.779	1.62932	0.322271	5.05575	4.28693e-07	1.86997e-06	ENSNFUG00015017584	dapp1
96.579	1.62854	0.336009	4.84672	1.25518e-06	5.06264e-06	ENSNFUG00015005973	cdkn1a
52.183	1.6283	0.318804	5.10753	3.264e-07	1.45372e-06	ENSNFUG00015014492	si:dkey-266j7.2
79.8049	1.62812	0.268464	6.06457	1.32305e-09	8.44276e-09	ENSNFUG00015011084	rgma
150.125	1.62759	0.200571	8.11477	4.86701e-16	6.8037e-15	ENSNFUG00015007255	dmrt3a
50.518	1.62487	0.287491	5.65191	1.58673e-08	8.59948e-08	ENSNFUG00015005250	zgc:194242
636.873	1.62448	0.284196	5.71605	1.09029e-08	6.08035e-08	ENSNFUG00015025418
1461.97	1.62421	0.103239	15.7326	9.04628e-56	1.53575e-53	ENSNFUG00015014207	si:dkey-90l8.3
199.107	1.61764	0.280503	5.76695	8.07199e-09	4.58849e-08	ENSNFUG00015021154	rgs3a
1060.42	1.61618	0.203851	7.92822	2.22315e-15	2.89717e-14	ENSNFUG00015001781	soul5l
155.371	1.61551	0.218023	7.40985	1.26442e-13	1.33259e-12	ENSNFUG00015008926	zmp:0000000936
119.353	1.61497	0.343609	4.70002	2.60132e-06	9.97329e-06	ENSNFUG00015002817
138.238	1.61496	0.168894	9.56199	1.15509e-21	2.81949e-20	ENSNFUG00015013307	nrip2
88.1459	1.61434	0.336425	4.79851	1.59847e-06	6.3254e-06	ENSNFUG00015015093	gfra1a
430.274	1.61421	0.210684	7.66177	1.83385e-14	2.15713e-13	ENSNFUG00015014758	eno3
706.537	1.61319	0.201464	8.00737	1.17191e-15	1.57739e-14	ENSNFUG00015006701	malt3
318.725	1.61256	0.309078	5.21732	1.81533e-07	8.41939e-07	ENSNFUG00015010057	si:ch211-180a12.2
1257.29	1.61248	0.0946174	17.0421	4.00376e-65	1.00596e-62	ENSNFUG00015011607
160.401	1.61219	0.35184	4.58217	4.6017e-06	1.69662e-05	ENSNFUG00015015978
339.764	1.61158	0.420897	3.82891	0.000128711	0.000370352	ENSNFUG00015024269	tfpi2
50.529	1.61037	0.28449	5.66057	1.50875e-08	8.2028e-08	ENSNFUG00015024880	zgc:162707
749.211	1.6085	0.42864	3.75256	0.000175039	0.000489746	ENSNFUG00015016101
1621.59	1.60796	0.179809	8.94264	3.79999e-19	7.44356e-18	ENSNFUG00015009643	ca7
574.723	1.60768	0.126981	12.6608	9.75203e-37	6.31502e-35	ENSNFUG00015010511	rnf141
308.825	1.60689	0.334953	4.79736	1.6077e-06	6.36057e-06	ENSNFUG00015025366	fam43a
117.436	1.60621	0.358168	4.48452	7.30774e-06	2.60316e-05	ENSNFUG00015008598
89.7006	1.59997	0.308924	5.17918	2.22867e-07	1.01934e-06	ENSNFUG00015020784	efna1a
88.2567	1.59911	0.277962	5.75299	8.76788e-09	4.95715e-08	ENSNFUG00015018730
54.0751	1.59855	0.43117	3.70748	0.000209331	0.000576028	ENSNFUG00015000530
225.544	1.59611	0.343189	4.65081	3.30627e-06	1.24557e-05	ENSNFUG00015024080
1960.29	1.59519	0.182677	8.73226	2.49626e-18	4.51435e-17	ENSNFUG00015000191	ppp1r1b
219.754	1.59494	0.31764	5.02121	5.13483e-07	2.20362e-06	ENSNFUG00015019161
318.114	1.59487	0.448772	3.55386	0.000379626	0.000986849	ENSNFUG00015005256	ppp1r12b
60.3711	1.59388	0.210145	7.58469	3.33275e-14	3.7947e-13	ENSNFUG00015011859
100.548	1.59357	0.200735	7.93867	2.04365e-15	2.67621e-14	ENSNFUG00015002197
377.784	1.59336	0.283654	5.61728	1.93983e-08	1.03641e-07	ENSNFUG00015013427	csf1ra
322.221	1.5931	0.199111	8.00108	1.23336e-15	1.6542e-14	ENSNFUG00015025236	itgb8
131.021	1.59286	0.229828	6.93064	4.18937e-12	3.69245e-11	ENSNFUG00015024234	ces2b
1614.92	1.59231	0.195859	8.12988	4.29714e-16	6.03393e-15	ENSNFUG00015005142	ip6k2a
94.369	1.58979	0.464417	3.42319	0.0006189	0.0015443	ENSNFUG00015014567	mustn1a
237.651	1.58876	0.3012	5.27478	1.32915e-07	6.29466e-07	ENSNFUG00015002792
1499.99	1.58868	0.175876	9.03293	1.6713e-19	3.36474e-18	ENSNFUG00015021312	slc6a19a.1
872.503	1.58841	0.317636	5.00073	5.71133e-07	2.43164e-06	ENSNFUG00015017418	Nfu_g_1_001221
98.9026	1.5878	0.325705	4.87498	1.08822e-06	4.43956e-06	ENSNFUG00015024400	CABZ01088025.1
148.102	1.58579	0.19343	8.19827	2.43872e-16	3.53774e-15	ENSNFUG00015017362
106.568	1.58461	0.427553	3.70624	0.000210357	0.000578427	ENSNFUG00015010743
150.82	1.58232	0.17952	8.81418	1.20569e-18	2.24728e-17	ENSNFUG00015002610
189.928	1.58036	0.199954	7.90361	2.70947e-15	3.49229e-14	ENSNFUG00015022336	klhl24a
2730.91	1.5797	0.101272	15.5986	7.43541e-55	1.20787e-52	ENSNFUG00015010128	fbxl17
286.563	1.57909	0.189448	8.33525	7.73338e-17	1.17333e-15	ENSNFUG00015006976	NAAA
607.9	1.57755	0.393091	4.01318	5.99058e-05	0.00018296	ENSNFUG00015021395
223.718	1.57701	0.573666	2.74901	0.00597764	0.0119667	ENSNFUG00015018297	slc34a2b
628.171	1.57655	0.185104	8.51711	1.63581e-17	2.69688e-16	ENSNFUG00015010343	id2a
167.072	1.5733	0.223869	7.02778	2.0985e-12	1.92429e-11	ENSNFUG00015020418	laynb
161.053	1.56992	0.19551	8.02984	9.75994e-16	1.32409e-14	ENSNFUG00015006871
135.717	1.56916	0.280454	5.59507	2.20531e-08	1.16996e-07	ENSNFUG00015023667	tlr1
219.149	1.56627	0.292084	5.36239	8.21279e-08	3.99901e-07	ENSNFUG00015003845	c5ar1
928.501	1.56572	0.164416	9.52293	1.6836e-21	4.057e-20	ENSNFUG00015002185
417.548	1.56483	0.309502	5.05597	4.28216e-07	1.86832e-06	ENSNFUG00015016402	myo1f
296.278	1.56406	0.298573	5.23846	1.61924e-07	7.56769e-07	ENSNFUG00015023775	CXCR4
516.853	1.56364	0.161973	9.65373	4.73981e-22	1.19408e-20	ENSNFUG00015013666	afap1l1a
2426.42	1.56284	0.188492	8.29129	1.12022e-16	1.67403e-15	ENSNFUG00015003697	naalad2
203.153	1.56098	0.122912	12.7	5.9152e-37	3.87035e-35	ENSNFUG00015001873	stard14
220.147	1.55826	0.188951	8.2469	1.62563e-16	2.41207e-15	ENSNFUG00015001852	rflnb
64.4532	1.55689	0.19495	7.9861	1.39275e-15	1.85608e-14	ENSNFUG00015012127	ppp1r14c
1434.53	1.55663	0.411628	3.78164	0.000155798	0.000440818	ENSNFUG00015003666	fn1b
93.9285	1.55651	0.305656	5.09236	3.53625e-07	1.56646e-06	ENSNFUG00015006589	tbx2b
235.259	1.55638	0.280266	5.55323	2.80443e-08	1.46715e-07	ENSNFUG00015021353	ZNF503
160.388	1.55483	0.652362	2.38338	0.0171543	0.0307453	ENSNFUG00015000879	TGFB3
289.585	1.55413	0.266555	5.83042	5.52878e-09	3.20887e-08	ENSNFUG00015019771
61.0492	1.55399	0.412835	3.76418	0.000167095	0.000469612	ENSNFUG00015016457
60.7946	1.55375	0.284832	5.45498	4.89794e-08	2.47113e-07	ENSNFUG00015021275	ildr1b
250.205	1.5529	0.14739	10.536	5.89241e-26	2.06388e-24	ENSNFUG00015003636	tmx2a
202.635	1.55071	0.238066	6.5138	7.32715e-11	5.52071e-10	ENSNFUG00015016588	keap1a
114.423	1.55071	0.193555	8.01174	1.13095e-15	1.52772e-14	ENSNFUG00015012669
50.051	1.55016	0.289076	5.36247	8.20897e-08	3.99819e-07	ENSNFUG00015012863	RAB33B
96.5004	1.55012	0.291173	5.3237	1.0168e-07	4.88542e-07	ENSNFUG00015007727	klf3
279.877	1.55006	0.250319	6.19236	5.92712e-10	3.98184e-09	ENSNFUG00015012103	HMOX1
283.026	1.54964	0.243661	6.35984	2.01969e-10	1.44437e-09	ENSNFUG00015007198	bhlhe40
100.817	1.54961	0.267086	5.8019	6.55685e-09	3.76814e-08	ENSNFUG00015018331	RELN
125.085	1.54951	0.207241	7.47684	7.61304e-14	8.27336e-13	ENSNFUG00015017994	elapor2a
70.0013	1.54826	0.308567	5.01756	5.23324e-07	2.2433e-06	ENSNFUG00015004730	arhgap31
112.173	1.54637	0.418476	3.69523	0.000219684	0.000601704	ENSNFUG00015004352	entpd2b
1078.25	1.54575	0.218025	7.08981	1.34301e-12	1.26349e-11	ENSNFUG00015008001	dab2
108.366	1.54518	0.171676	9.0006	2.24492e-19	4.4908e-18	ENSNFUG00015016851	dnajc5aa
728.508	1.54489	0.169101	9.13587	6.48806e-20	1.35846e-18	ENSNFUG00015011514	slc12a9
428.215	1.54452	0.11295	13.6744	1.44441e-42	1.2911e-40	ENSNFUG00015010420	smyd1b
158.298	1.54446	0.277702	5.56157	2.67353e-08	1.40217e-07	ENSNFUG00015004199	CLMP
676.919	1.54416	0.121058	12.7555	2.90343e-37	1.96101e-35	ENSNFUG00015013284	SCD
188.874	1.54396	0.213641	7.22689	4.94182e-13	4.92197e-12	ENSNFUG00015015190	ABHD12B
302.894	1.54393	0.222842	6.92838	4.25698e-12	3.74677e-11	ENSNFUG00015021298	kirrel1b
54.8	1.54212	0.214731	7.18164	6.88785e-13	6.70427e-12	ENSNFUG00015023189	HOMER2
520.929	1.54179	0.0973102	15.844	1.54586e-56	2.69723e-54	ENSNFUG00015008346	CLCN2
836.329	1.54116	0.140556	10.9648	5.64315e-28	2.32182e-26	ENSNFUG00015015906	hdac7b
104.342	1.54101	0.279102	5.52131	3.36486e-08	1.73957e-07	ENSNFUG00015011889	slc23a1
205.723	1.54071	0.279856	5.50539	3.68347e-08	1.89493e-07	ENSNFUG00015009979	ccr12a
70.5043	1.53884	0.671452	2.29181	0.0219168	0.0382195	ENSNFUG00015015433	fscn2b
316.647	1.53738	0.246638	6.23334	4.56588e-10	3.12564e-09	ENSNFUG00015012359	slc41a1
172.026	1.53722	0.220151	6.98258	2.89802e-12	2.61794e-11	ENSNFUG00015009104	gpc1b
291.396	1.53577	0.240556	6.38422	1.72269e-10	1.24139e-09	ENSNFUG00015024646
608.101	1.53528	0.176402	8.70331	3.22331e-18	5.77377e-17	ENSNFUG00015020044	fus
141.46	1.53523	0.125922	12.192	3.42948e-34	1.97695e-32	ENSNFUG00015008283
362.025	1.53484	0.301632	5.08845	3.60995e-07	1.59498e-06	ENSNFUG00015021331	mcamb
447.169	1.53426	0.126758	12.1039	1.0074e-33	5.63307e-32	ENSNFUG00015011946	efnb1
89.322	1.53203	0.361997	4.23217	2.31448e-05	7.59803e-05	ENSNFUG00015006301	ptpreb
876.113	1.53194	0.177276	8.64155	5.5454e-18	9.68466e-17	ENSNFUG00015003034	plpp1a
133.822	1.53021	0.268889	5.69085	1.26412e-08	6.96726e-08	ENSNFUG00015003931
936.163	1.52972	0.254786	6.00394	1.92581e-09	1.19651e-08	ENSNFUG00015004139	moxd1l
175.531	1.52943	0.202071	7.56876	3.76803e-14	4.25688e-13	ENSNFUG00015002391
159.726	1.52798	0.285968	5.34319	9.13231e-08	4.42048e-07	ENSNFUG00015016963	CAPN3
53.6935	1.52503	0.215061	7.09116	1.32996e-12	1.25309e-11	ENSNFUG00015018010
198.46	1.52357	0.311992	4.88335	1.04297e-06	4.2688e-06	ENSNFUG00015017826	spi1b
87.3301	1.52045	0.252755	6.0155	1.79331e-09	1.11898e-08	ENSNFUG00015016069	b4galt3
357.254	1.52037	0.204426	7.43724	1.0281e-13	1.0927e-12	ENSNFUG00015012167	CD97
369.567	1.51956	0.0926647	16.3984	1.96203e-60	4.29913e-58	ENSNFUG00015022268	aadat
251.7	1.51943	0.0989903	15.3493	3.57843e-53	5.3096e-51	ENSNFUG00015007230	ptpn9a
171.913	1.51783	0.232287	6.53429	6.39111e-11	4.87587e-10	ENSNFUG00015006912
81.865	1.51689	0.302323	5.01746	5.23603e-07	2.24398e-06	ENSNFUG00015024742	tnika
226.457	1.51663	0.166997	9.08174	1.06853e-19	2.19101e-18	ENSNFUG00015005310
348.771	1.51415	0.218173	6.94012	3.91776e-12	3.46602e-11	ENSNFUG00015023979	OTOP1
184.467	1.51254	0.145059	10.4271	1.86527e-25	6.27663e-24	ENSNFUG00015002199	dpf3
322.941	1.51222	0.169547	8.91919	4.69726e-19	9.11588e-18	ENSNFUG00015016561
436.517	1.51107	0.37586	4.02031	5.81218e-05	0.00017806	ENSNFUG00015001371	cyba
56.6829	1.50894	0.274074	5.50559	3.67925e-08	1.89328e-07	ENSNFUG00015003396
152.6	1.5078	0.271385	5.55594	2.76126e-08	1.44577e-07	ENSNFUG00015018176	PDE3A
270.179	1.50637	0.188108	8.008	1.1659e-15	1.57043e-14	ENSNFUG00015002691	tnfrsf1a
251.929	1.50582	0.295543	5.09508	3.48601e-07	1.54529e-06	ENSNFUG00015010499	disc1
149.071	1.5049	0.232596	6.47003	9.79835e-11	7.2865e-10	ENSNFUG00015013979	fam20cb
70.3797	1.50412	0.402045	3.74117	0.000183165	0.000510134	ENSNFUG00015021584	klhl43
133.752	1.499	0.22803	6.57371	4.90758e-11	3.8104e-10	ENSNFUG00015024287	si:ch73-334d15.1
72.9419	1.4957	0.280332	5.33548	9.52905e-08	4.6007e-07	ENSNFUG00015006059	plek2
53.7264	1.49516	0.410284	3.64422	0.000268204	0.000719641	ENSNFUG00015025219
88.5853	1.49513	0.334204	4.47371	7.68737e-06	2.72705e-05	ENSNFUG00015018339	inpp5ja
77.6846	1.49166	0.218472	6.8277	8.62889e-12	7.32445e-11	ENSNFUG00015010698	RBM20
169.328	1.49142	0.175378	8.50402	1.83136e-17	3.00873e-16	ENSNFUG00015002029	csrp2
1830.43	1.49017	0.149311	9.98027	1.85959e-23	5.27743e-22	ENSNFUG00015010965	RNF219
2518.68	1.48999	0.16452	9.05656	1.34627e-19	2.72493e-18	ENSNFUG00015009391
54.998	1.48567	0.457902	3.24451	0.00117651	0.00276608	ENSNFUG00015004337	atp8b1
512.849	1.48509	0.635792	2.33581	0.019501	0.0345081	ENSNFUG00015023122
173.345	1.48487	0.26216	5.66399	1.47895e-08	8.06403e-08	ENSNFUG00015013442	rhpn2
153.791	1.48408	0.218057	6.80594	1.00394e-11	8.44189e-11	ENSNFUG00015017659	LDLRAD3
558.945	1.4836	0.398238	3.7254	0.000195009	0.000540325	ENSNFUG00015007587	vcla
134.759	1.48356	0.120963	12.2645	1.40401e-34	8.26787e-33	ENSNFUG00015001961	cyp2u1
81.6288	1.48343	0.19791	7.49549	6.60503e-14	7.24899e-13	ENSNFUG00015019884	snx33
113.486	1.4833	0.346062	4.28624	1.81723e-05	6.06623e-05	ENSNFUG00015010443	ndel1a
545.291	1.48289	0.165008	8.98679	2.54562e-19	5.06008e-18	ENSNFUG00015005926	GGA2
105.23	1.48287	0.30471	4.86648	1.13604e-06	4.62264e-06	ENSNFUG00015003170	ccdc85cb
246.138	1.48132	0.193844	7.64179	2.14218e-14	2.49797e-13	ENSNFUG00015011723	gnb2
209.958	1.48061	0.28597	5.17751	2.24868e-07	1.02775e-06	ENSNFUG00015018824	pip5k1bb
76.2854	1.48055	0.267499	5.53477	3.11634e-08	1.62087e-07	ENSNFUG00015000700	FHL2
261.119	1.48012	0.173753	8.51852	1.61611e-17	2.66672e-16	ENSNFUG00015006798	asb14a
101.86	1.47499	0.221938	6.64596	3.01243e-11	2.40128e-10	ENSNFUG00015016281	ALDH1L1
271.837	1.47427	0.248773	5.92616	3.10106e-09	1.87116e-08	ENSNFUG00015002851	si:ch211-241f5.3
158.635	1.47359	0.321504	4.58342	4.57437e-06	1.68688e-05	ENSNFUG00015013991	anpepa
1688.88	1.47316	0.20367	7.23309	4.72143e-13	4.70994e-12	ENSNFUG00015005947	abca1a
268.771	1.47304	0.219043	6.72489	1.75731e-11	1.43914e-10	ENSNFUG00015025404	mcoln2
148.161	1.47296	0.293183	5.02403	5.05995e-07	2.17495e-06	ENSNFUG00015011734	itga5
132.72	1.47149	0.227444	6.46969	9.82016e-11	7.29984e-10	ENSNFUG00015016762	MPZL2
299.367	1.47144	0.24617	5.97735	2.26798e-09	1.39393e-08	ENSNFUG00015001503
173.082	1.47128	0.297029	4.95331	7.296e-07	3.06068e-06	ENSNFUG00015006615
180.156	1.47085	0.157912	9.31439	1.22651e-20	2.72873e-19	ENSNFUG00015012987
410.845	1.47073	0.206375	7.12648	1.02972e-12	9.8248e-12	ENSNFUG00015011828
76.5436	1.46562	0.250339	5.85455	4.78304e-09	2.80643e-08	ENSNFUG00015003834	MYOM2
10241.1	1.46552	0.208493	7.02909	2.07885e-12	1.9072e-11	ENSNFUG00015018156
877.572	1.46541	0.115271	12.7128	5.02231e-37	3.32072e-35	ENSNFUG00015014225
120.012	1.4653	0.277612	5.27821	1.30453e-07	6.18739e-07	ENSNFUG00015017101	ptk2bb
154.631	1.46424	0.292678	5.00289	5.64763e-07	2.40778e-06	ENSNFUG00015007076
208.725	1.46379	0.196995	7.43063	1.0808e-13	1.14612e-12	ENSNFUG00015001614	rasip1
61.3763	1.46375	0.337048	4.34283	1.40656e-05	4.77573e-05	ENSNFUG00015008626	clcn2a
130.572	1.46181	0.167634	8.72024	2.77604e-18	4.98682e-17	ENSNFUG00015017992	slco4a1
94.7515	1.4613	0.266565	5.48195	4.20671e-08	2.14479e-07	ENSNFUG00015016806	OTOR
308.185	1.46122	0.213329	6.8496	7.40552e-12	6.3374e-11	ENSNFUG00015017491	NR0B1
141.696	1.46065	0.209701	6.96539	3.27484e-12	2.92331e-11	ENSNFUG00015004949	nectin1b
272.796	1.46044	0.117695	12.4087	2.34497e-35	1.4163e-33	ENSNFUG00015019689	TIMP3
142.705	1.45999	0.177588	8.22123	2.01419e-16	2.96064e-15	ENSNFUG00015004486	Nfu_g_1_000336
651.57	1.45966	0.256666	5.68698	1.29306e-08	7.11638e-08	ENSNFUG00015018485	tspan36
95.2525	1.45902	0.370936	3.93334	8.37749e-05	0.00024955	ENSNFUG00015022775
640.954	1.45669	0.183046	7.95806	1.74752e-15	2.30766e-14	ENSNFUG00015017696	npr1a
192.508	1.45548	0.338579	4.29879	1.7173e-05	5.74689e-05	ENSNFUG00015005009	plekhg5b
107.44	1.45526	0.308204	4.72173	2.33846e-06	9.04475e-06	ENSNFUG00015019254	mkxa
168.474	1.45362	0.318335	4.56634	4.96325e-06	1.82137e-05	ENSNFUG00015023459	nrros
2978.04	1.45224	0.0928627	15.6385	3.97788e-55	6.51819e-53	ENSNFUG00015007586	prkag2b
1192.05	1.45195	0.179351	8.09561	5.69798e-16	7.90086e-15	ENSNFUG00015003814	slc52a3-2b
131.954	1.45024	0.272143	5.32895	9.87809e-08	4.7546e-07	ENSNFUG00015006887	antxr1a
134.465	1.45016	0.198552	7.30366	2.80041e-13	2.86332e-12	ENSNFUG00015014715
508.402	1.44763	0.420306	3.44424	0.000572676	0.00143848	ENSNFUG00015000317	ptpn6
118.877	1.44544	0.172984	8.35592	6.49235e-17	9.91425e-16	ENSNFUG00015003652	pstpip2
250.13	1.44404	0.342329	4.21829	2.46165e-05	8.0366e-05	ENSNFUG00015005480	lrrk2
644.09	1.44121	0.0821563	17.5423	6.81436e-69	1.91657e-66	ENSNFUG00015010182	sqor
1684.78	1.44088	0.138199	10.4261	1.88382e-25	6.32774e-24	ENSNFUG00015011525
64.9949	1.43662	0.388906	3.69401	0.000220746	0.000603911	ENSNFUG00015008889
569.695	1.43423	0.0966996	14.8318	9.1272e-50	1.17002e-47	ENSNFUG00015015349	asah1b
119.757	1.43167	0.213005	6.72129	1.80124e-11	1.47192e-10	ENSNFUG00015013583	slc12a10.1
231.456	1.43113	0.307431	4.65514	3.23762e-06	1.2219e-05	ENSNFUG00015018946	psmb13a
90.1858	1.43006	0.386649	3.6986	0.000216788	0.000594549	ENSNFUG00015002721	prss35
71.1523	1.42963	0.247615	5.77358	7.76051e-09	4.42077e-08	ENSNFUG00015020104
50.5208	1.42943	0.27073	5.2799	1.29254e-07	6.13674e-07	ENSNFUG00015014379	ST8SIA3
482.838	1.42933	0.257938	5.54137	3.00113e-08	1.56484e-07	ENSNFUG00015011957	nr5a1a
6563.3	1.42898	0.130916	10.9153	9.74142e-28	3.93078e-26	ENSNFUG00015001901	atp1a1a.1
155.352	1.42772	0.12238	11.6664	1.89364e-31	9.69666e-30	ENSNFUG00015014663	KCNIP3
149.249	1.4264	0.394277	3.61777	0.000297155	0.00078978	ENSNFUG00015010990	ADAMTSL1
146.375	1.42406	0.203998	6.98075	2.93607e-12	2.64851e-11	ENSNFUG00015016677	dhrs12la
54.6749	1.42191	0.23617	6.0207	1.73661e-09	1.08575e-08	ENSNFUG00015021794	slc27a2a
99.2183	1.42068	0.173339	8.19596	2.48609e-16	3.58987e-15	ENSNFUG00015022896	apold1a
60.7948	1.41842	0.227927	6.22313	4.87331e-10	3.32365e-09	ENSNFUG00015009336
337.401	1.41799	0.184596	7.68161	1.57096e-14	1.86889e-13	ENSNFUG00015008546	hspbap1
79.3287	1.41764	0.258854	5.47659	4.33603e-08	2.20654e-07	ENSNFUG00015022515	rgmb
147.499	1.41601	0.11093	12.7649	2.57395e-37	1.74473e-35	ENSNFUG00015003474	nyap2a
319.144	1.41494	0.305848	4.6263	3.72263e-06	1.39102e-05	ENSNFUG00015000838
1188.79	1.41472	0.178401	7.92996	2.19209e-15	2.86107e-14	ENSNFUG00015001029	ctif
90.0309	1.41375	0.243793	5.79898	6.67196e-09	3.82612e-08	ENSNFUG00015023426
281.292	1.40948	0.130474	10.8028	3.33925e-27	1.28944e-25	ENSNFUG00015017598	rbks
82.4495	1.40802	0.331712	4.24469	2.18897e-05	7.21387e-05	ENSNFUG00015009573	si:ch211-117c9.1
256.227	1.40721	0.122311	11.5052	1.24213e-30	6.04825e-29	ENSNFUG00015001218	sfxn5b
186.708	1.40591	0.218088	6.44656	1.1442e-10	8.38965e-10	ENSNFUG00015013140	ROCK2
107.561	1.40587	0.35347	3.97734	6.96895e-05	0.000210521	ENSNFUG00015007912	btk
1281.87	1.40437	0.216641	6.48247	9.02315e-11	6.73395e-10	ENSNFUG00015002464	slc3a1
853.705	1.40325	0.223238	6.28588	3.26009e-10	2.26858e-09	ENSNFUG00015019492	arrdc3a
157.759	1.40127	0.305453	4.58752	4.48534e-06	1.65534e-05	ENSNFUG00015004364	cebpa
92.0978	1.39953	0.419482	3.33634	0.000848908	0.00205879	ENSNFUG00015012311	she
168.856	1.39939	0.159147	8.7931	1.45495e-18	2.70385e-17	ENSNFUG00015018487	lrig3
60.4948	1.39837	0.328839	4.25244	2.11458e-05	6.98827e-05	ENSNFUG00015019888
326.583	1.39745	0.199489	7.00516	2.46705e-12	2.24585e-11	ENSNFUG00015024852	atp2a3
81.1178	1.39658	0.185884	7.51316	5.7719e-14	6.35685e-13	ENSNFUG00015024634	cntn3a.1
199.46	1.39581	0.163395	8.54254	1.31306e-17	2.18968e-16	ENSNFUG00015005830	rdh12
57.4709	1.39559	0.286599	4.86947	1.11896e-06	4.55907e-06	ENSNFUG00015025041	stk39
373.912	1.39393	0.166938	8.34999	6.82672e-17	1.03828e-15	ENSNFUG00015024689
219.73	1.39328	0.255961	5.44331	5.22987e-08	2.62805e-07	ENSNFUG00015007078	pde4ba
421.639	1.39303	0.223317	6.23793	4.43398e-10	3.03722e-09	ENSNFUG00015014945	nupr1a
12429.2	1.39254	0.109237	12.7478	3.20565e-37	2.1574e-35	ENSNFUG00015007257	psap
55.3598	1.39053	0.447934	3.10433	0.00190713	0.00428088	ENSNFUG00015022858	mmp9
162.312	1.39014	0.17933	7.75187	9.05493e-15	1.10014e-13	ENSNFUG00015025030	nostrin
281.262	1.38495	0.189108	7.32361	2.41384e-13	2.47613e-12	ENSNFUG00015022932	inpp5l
50.1101	1.38394	0.345971	4.00015	6.33028e-05	0.000192431	ENSNFUG00015019541	zp3b
76.6195	1.38372	0.219269	6.31062	2.77925e-10	1.95419e-09	ENSNFUG00015007254	mthfs
1272.56	1.38344	0.170136	8.13137	4.24472e-16	5.96477e-15	ENSNFUG00015001564	STEAP3
87.9606	1.38145	0.214058	6.45359	1.09231e-10	8.04983e-10	ENSNFUG00015003703
62.0398	1.37928	0.363587	3.79354	0.000148518	0.000422376	ENSNFUG00015019407
184.595	1.37909	0.184012	7.49455	6.65276e-14	7.29713e-13	ENSNFUG00015000656	pcdh1b
569.763	1.37877	0.282588	4.87908	1.06582e-06	4.35575e-06	ENSNFUG00015001836	capgb
197.227	1.37877	0.161295	8.54811	1.25121e-17	2.09209e-16	ENSNFUG00015012983	rdh14a
5827.63	1.37553	0.1056	13.0258	8.72301e-39	6.52288e-37	ENSNFUG00015012770
307.81	1.37529	0.314802	4.36873	1.24969e-05	4.27854e-05	ENSNFUG00015025440	fbn2b
606.742	1.375	0.163706	8.3992	4.49517e-17	7.00636e-16	ENSNFUG00015022816	cd302
137.866	1.37362	0.209261	6.56417	5.23249e-11	4.03937e-10	ENSNFUG00015021090	irf6
65.9635	1.37287	0.27987	4.90537	9.32494e-07	3.8459e-06	ENSNFUG00015006861	PPIC
285.702	1.37279	0.0886617	15.4835	4.48573e-54	7.10328e-52	ENSNFUG00015025369	xxylt1
166.924	1.37227	0.230592	5.95104	2.66436e-09	1.62011e-08	ENSNFUG00015007756	CABZ01071177.1
462.342	1.37199	0.128734	10.6575	1.60883e-26	5.95614e-25	ENSNFUG00015011652	gjc2
92.7235	1.37141	0.369542	3.71111	0.000206352	0.000568327	ENSNFUG00015000314	cyth4b
247.502	1.371	0.165107	8.3037	1.00922e-16	1.51295e-15	ENSNFUG00015000143	cox7a1
582.102	1.37061	0.405059	3.38372	0.000715107	0.00176012	ENSNFUG00015022105	fkbp5
392.994	1.36917	0.161594	8.47289	2.39372e-17	3.87853e-16	ENSNFUG00015005552	slco2b1
688.915	1.3683	0.272495	5.02137	5.13041e-07	2.20222e-06	ENSNFUG00015014696	C1QA
79.4615	1.36785	0.270776	5.0516	4.38118e-07	1.90888e-06	ENSNFUG00015012494	hsd17b12a
3594.94	1.36724	0.115236	11.8647	1.80444e-32	9.57826e-31	ENSNFUG00015015269	slc6a6b
317.852	1.36623	0.272227	5.01872	5.20174e-07	2.23081e-06	ENSNFUG00015023705	ugt1a1
127.382	1.363	0.155758	8.75075	2.11934e-18	3.86237e-17	ENSNFUG00015007098	si:ch73-290k24.6
54.0276	1.36231	0.41142	3.31124	0.000928847	0.00223113	ENSNFUG00015022906	ANGPTL4
58.4174	1.36223	0.202039	6.74241	1.55776e-11	1.2841e-10	ENSNFUG00015010043	CABZ01085085.1
798.048	1.36198	0.230929	5.89784	3.68293e-09	2.20391e-08	ENSNFUG00015001227	ogal
199.311	1.3618	0.152898	8.90662	5.26129e-19	1.01686e-17	ENSNFUG00015008390	per2
60.4156	1.36066	0.189832	7.16772	7.62554e-13	7.37657e-12	ENSNFUG00015016351	ZCCHC24
696.209	1.35828	0.115948	11.7146	1.07304e-31	5.53982e-30	ENSNFUG00015000519	slc31a1
175.2	1.35828	0.289504	4.69174	2.70893e-06	1.03565e-05	ENSNFUG00015021408	plpp3
118.096	1.35806	0.189527	7.16554	7.74833e-13	7.48767e-12	ENSNFUG00015023892	PRICKLE2
535.329	1.35766	0.220339	6.16169	7.19705e-10	4.76868e-09	ENSNFUG00015019662	nfat5b
96.1704	1.35702	0.277325	4.89324	9.91874e-07	4.06943e-06	ENSNFUG00015021240	dok2
189.54	1.35692	0.23259	5.83395	5.41307e-09	3.14439e-08	ENSNFUG00015001634
61.8558	1.35454	0.265463	5.10256	3.35088e-07	1.48924e-06	ENSNFUG00015015696
988.29	1.3545	0.131207	10.3233	5.5273e-25	1.81457e-23	ENSNFUG00015003993	ppp4r4
896.432	1.35317	0.219438	6.16654	6.97991e-10	4.64112e-09	ENSNFUG00015003489
206.557	1.35218	0.197423	6.84914	7.42957e-12	6.3551e-11	ENSNFUG00015000427
87.3252	1.35098	0.466505	2.89596	0.00378001	0.00791626	ENSNFUG00015012055	si:dkey-22o22.2
360.317	1.34937	0.290979	4.63736	3.52891e-06	1.32389e-05	ENSNFUG00015008575	ANOS1
804.82	1.34932	0.206041	6.5488	5.79999e-11	4.44469e-10	ENSNFUG00015005961	timp2a
104.962	1.34889	0.21958	6.14305	8.0954e-10	5.32088e-09	ENSNFUG00015017145	fhdc1
331.857	1.34809	0.127731	10.5542	4.85992e-26	1.71499e-24	ENSNFUG00015012845	ccser2a
439.947	1.34646	0.143391	9.39009	5.99466e-21	1.3676e-19	ENSNFUG00015004856
1295.45	1.34594	0.214777	6.26669	3.68803e-10	2.54662e-09	ENSNFUG00015001971	zgc:162730
1168.95	1.34454	0.26641	5.04689	4.49059e-07	1.95248e-06	ENSNFUG00015010081
161.506	1.34215	0.181642	7.38898	1.47961e-13	1.54813e-12	ENSNFUG00015005223	nav2a
110.404	1.34143	0.133354	10.0592	8.3713e-24	2.44572e-22	ENSNFUG00015006066	usp18
70.9348	1.34117	0.190027	7.05778	1.69183e-12	1.57204e-11	ENSNFUG00015006551
145.084	1.34099	0.26883	4.98824	6.09331e-07	2.58667e-06	ENSNFUG00015018827	bco1
202.499	1.34056	0.354559	3.78091	0.000156256	0.000441916	ENSNFUG00015017717	plek
72.2831	1.34042	0.30409	4.40798	1.04341e-05	3.61899e-05	ENSNFUG00015004295
98.8281	1.34018	0.198379	6.75566	1.4219e-11	1.17829e-10	ENSNFUG00015011136	cyb561a3a
245.991	1.33868	0.134515	9.95196	2.47252e-23	6.9437e-22	ENSNFUG00015004028	fgd4b
111.867	1.33868	0.195055	6.86312	6.73727e-12	5.79713e-11	ENSNFUG00015023332	adamts9
1119.03	1.33754	0.114472	11.6844	1.53088e-31	7.86045e-30	ENSNFUG00015020541	alpl
67.0051	1.3372	0.240183	5.56743	2.58517e-08	1.35885e-07	ENSNFUG00015018841	acvr2bb
190.443	1.33671	0.181695	7.35688	1.88265e-13	1.95034e-12	ENSNFUG00015025083
180.23	1.33498	0.221577	6.02492	1.69197e-09	1.06172e-08	ENSNFUG00015008210	ADAMTS15
707.687	1.33437	0.282821	4.71807	2.38097e-06	9.18839e-06	ENSNFUG00015005732	fads2
189.14	1.33381	0.172276	7.74228	9.76459e-15	1.18179e-13	ENSNFUG00015018609	tmem106a
304.599	1.3335	0.204917	6.50755	7.63877e-11	5.74173e-10	ENSNFUG00015007875	IL2RGA
55.5528	1.33278	0.309494	4.30632	1.65993e-05	5.56877e-05	ENSNFUG00015024324	kazna
393.637	1.33191	0.25326	5.25904	1.44806e-07	6.82181e-07	ENSNFUG00015012459	lsr
258.993	1.33114	0.414144	3.21419	0.00130811	0.00304434	ENSNFUG00015000243	Nfu_g_1_006350
177.802	1.33055	0.125623	10.5916	3.26107e-26	1.17498e-24	ENSNFUG00015001376	cited4b
295.185	1.33026	0.17966	7.40433	1.31816e-13	1.38613e-12	ENSNFUG00015018635	frmd4a
241.776	1.32972	0.266885	4.98238	6.2808e-07	2.65788e-06	ENSNFUG00015000600	ANO4
258.309	1.32859	0.191913	6.92284	4.42662e-12	3.89245e-11	ENSNFUG00015003901	gata4
96.2592	1.32671	0.25578	5.18693	2.13792e-07	9.81653e-07	ENSNFUG00015011146	stard13a
77.2595	1.32655	0.458211	2.89506	0.00379091	0.0079382	ENSNFUG00015009402	klhl40a
62.2655	1.32607	0.181676	7.29909	2.89731e-13	2.95918e-12	ENSNFUG00015007432	flvcr1
101.101	1.32578	0.171939	7.71075	1.25077e-14	1.49933e-13	ENSNFUG00015018819
1305.82	1.32505	0.0827981	16.0034	1.20897e-57	2.19055e-55	ENSNFUG00015023222
800.692	1.32404	0.120341	11.0024	3.7197e-28	1.53715e-26	ENSNFUG00015015656	sgpl1
57.7309	1.32349	0.213358	6.20313	5.53519e-10	3.73318e-09	ENSNFUG00015017280	nr2f6b
307.413	1.32234	0.4293	3.08023	0.00206843	0.00460185	ENSNFUG00015009103	plvapa
85.2312	1.32107	0.336741	3.92309	8.74199e-05	0.000259669	ENSNFUG00015021726	jph2
139.644	1.31952	0.241423	5.46558	4.614e-08	2.33978e-07	ENSNFUG00015008707	glra4a
272.742	1.31934	0.215705	6.11638	9.57236e-10	6.22434e-09	ENSNFUG00015000526	NACC2
51.6447	1.31927	0.333724	3.95317	7.71211e-05	0.000231192	ENSNFUG00015002002	abcg8
213.729	1.31889	0.174286	7.56738	3.80832e-14	4.29468e-13	ENSNFUG00015019069	si:dkey-12e7.4
206.851	1.31781	0.175247	7.51976	5.48776e-14	6.06162e-13	ENSNFUG00015017884
2858.12	1.31762	0.222792	5.91414	3.33621e-09	2.00534e-08	ENSNFUG00015019460	ctsk
161.257	1.31678	0.307929	4.27626	1.9006e-05	6.3266e-05	ENSNFUG00015025151	tifa
85.9702	1.31216	0.21927	5.9842	2.17456e-09	1.33957e-08	ENSNFUG00015022525
243.604	1.31176	0.289179	4.53616	5.7288e-06	2.08003e-05	ENSNFUG00015003153
81.7336	1.31129	0.204149	6.4232	1.33437e-10	9.72723e-10	ENSNFUG00015015355	smpd3
330.943	1.31094	0.423502	3.09548	0.00196492	0.0043975	ENSNFUG00015022552
734.266	1.31004	0.201584	6.49875	8.0991e-11	6.07078e-10	ENSNFUG00015006483	irs2b
131.529	1.30975	0.119493	10.9609	5.89228e-28	2.41904e-26	ENSNFUG00015001027	gareml
2348.04	1.30954	0.216037	6.06166	1.34727e-09	8.58573e-09	ENSNFUG00015011357	arhgef9
127.847	1.3064	0.236566	5.52235	3.34486e-08	1.73113e-07	ENSNFUG00015010458	gpr137ba
105.738	1.30581	0.290656	4.49262	7.03538e-06	2.51374e-05	ENSNFUG00015020690	dusp6
1259.18	1.30549	0.253064	5.15873	2.48635e-07	1.12871e-06	ENSNFUG00015010983	emilin2a
55.4635	1.30118	0.34725	3.74711	0.000178885	0.000499441	ENSNFUG00015012515	fndc5b
184.772	1.29991	0.352487	3.68783	0.000226171	0.00061723	ENSNFUG00015017749	ldha
986.714	1.29976	0.144625	8.9871	2.53843e-19	5.05112e-18	ENSNFUG00015022075	gba1
173.647	1.29829	0.173489	7.48342	7.24121e-14	7.90575e-13	ENSNFUG00015020092	rab11bb
210.489	1.29761	0.269978	4.80636	1.537e-06	6.10781e-06	ENSNFUG00015005470	emilin1b
189.084	1.29689	0.229652	5.64721	1.63072e-08	8.81251e-08	ENSNFUG00015019462	sgcg
2680.59	1.29641	0.197761	6.55545	5.54739e-11	4.26499e-10	ENSNFUG00015018866	zgc:113531
86.2483	1.29566	0.218885	5.91935	3.2321e-09	1.94711e-08	ENSNFUG00015017108
384.772	1.29554	0.274777	4.71486	2.41876e-06	9.31516e-06	ENSNFUG00015006102	hcls1
287.712	1.29452	0.218895	5.91386	3.34191e-09	2.00813e-08	ENSNFUG00015003265	lipeb
130.62	1.29332	0.200896	6.43773	1.21275e-10	8.87497e-10	ENSNFUG00015007296	RND2
439.415	1.29279	0.119406	10.8268	2.56928e-27	1.00239e-25	ENSNFUG00015011940	samm50
116.174	1.29197	0.418018	3.09072	0.00199674	0.00446235	ENSNFUG00015022002	plekhn1
69.2148	1.29143	0.205492	6.28457	3.28773e-10	2.28697e-09	ENSNFUG00015003048	mat1a
75.4471	1.29071	0.167322	7.71394	1.21988e-14	1.46417e-13	ENSNFUG00015008465	myorg
199.613	1.29036	0.214814	6.00684	1.8917e-09	1.17686e-08	ENSNFUG00015022136	ptprea
867.406	1.29009	0.238973	5.39847	6.72131e-08	3.32432e-07	ENSNFUG00015025398	jak1
65.4105	1.28996	0.45859	2.81289	0.00490988	0.0100067	ENSNFUG00015023617	chrm3a
307.493	1.28845	0.144803	8.89794	5.68929e-19	1.08952e-17	ENSNFUG00015019277	cbx4
135.042	1.28825	0.286715	4.49312	7.01876e-06	2.50875e-05	ENSNFUG00015009275	prickle1a
732.413	1.28767	0.221323	5.81807	5.953e-09	3.43053e-08	ENSNFUG00015003702	itgb3a
131	1.28681	0.144804	8.88659	6.30149e-19	1.20066e-17	ENSNFUG00015007513	pla2g4ab
54.7707	1.28566	0.315109	4.08006	4.50239e-05	0.000140949	ENSNFUG00015003492	spint1b
376.538	1.28544	0.236979	5.42425	5.81989e-08	2.89902e-07	ENSNFUG00015007144	FBP1A
80.0452	1.28427	0.164146	7.82399	5.11765e-15	6.37389e-14	ENSNFUG00015021518	oma1
1591.86	1.28394	0.170598	7.52611	5.2275e-14	5.79113e-13	ENSNFUG00015006385	scpep1
131.958	1.28279	0.239255	5.36162	8.24786e-08	4.01505e-07	ENSNFUG00015021730	cables2b
217.69	1.28109	0.294252	4.35371	1.33855e-05	4.56042e-05	ENSNFUG00015009722	b4galnt1b
458.758	1.27963	0.153766	8.32196	8.6524e-17	1.30541e-15	ENSNFUG00015012176	shc1
68.5341	1.2795	0.195848	6.53312	6.4415e-11	4.91233e-10	ENSNFUG00015014270	cln5
277.928	1.27941	0.185066	6.91328	4.73561e-12	4.14097e-11	ENSNFUG00015006330	adamts7
142.091	1.2779	0.167755	7.61764	2.58364e-14	2.98139e-13	ENSNFUG00015010711	mef2d
1390.69	1.27782	0.141405	9.03663	1.61583e-19	3.25655e-18	ENSNFUG00015007655	ctsz
516.078	1.27776	0.183765	6.9532	3.57098e-12	3.17114e-11	ENSNFUG00015011920	ppp1r14ba
52.8768	1.27755	0.311724	4.09833	4.16135e-05	0.000131109	ENSNFUG00015011488	cyp2y3
436.605	1.27719	0.169668	7.52757	5.16949e-14	5.74035e-13	ENSNFUG00015023151
906.166	1.27665	0.158397	8.05985	7.63859e-16	1.04761e-14	ENSNFUG00015009458	zgc:153039
71.113	1.27549	0.280647	4.54484	5.49779e-06	2.00271e-05	ENSNFUG00015010659	si:cabz01080888.1
1407.21	1.27521	0.195451	6.52447	6.82413e-11	5.17689e-10	ENSNFUG00015005016	mpp1
62.2686	1.27496	0.309888	4.11426	3.8842e-05	0.000122973	ENSNFUG00015003770	drp2
84.9681	1.27481	0.261004	4.88426	1.03817e-06	4.25013e-06	ENSNFUG00015016523	klf12b
68.8168	1.2726	0.180624	7.04561	1.8465e-12	1.70817e-11	ENSNFUG00015003426	pdgfd
91.4181	1.27127	0.293386	4.33311	1.47017e-05	4.97554e-05	ENSNFUG00015021680	cybc1
200.511	1.27126	0.331842	3.83093	0.000127662	0.000367727	ENSNFUG00015003556	PTGS1
452.035	1.26853	0.207	6.12815	8.89042e-10	5.80898e-09	ENSNFUG00015021668	hexd
188.946	1.26837	0.350188	3.62196	0.000292377	0.000778186	ENSNFUG00015006665	cdh5
81.619	1.26834	0.281214	4.51023	6.47576e-06	2.32925e-05	ENSNFUG00015015969	ntrk2a
461.919	1.26756	0.219843	5.76576	8.12916e-09	4.6196e-08	ENSNFUG00015005316	cyp3c1
195.306	1.26725	0.160582	7.89159	2.98352e-15	3.825e-14	ENSNFUG00015019040
388.143	1.26611	0.269018	4.70641	2.5212e-06	9.68791e-06	ENSNFUG00015021965	gas1a
63.8632	1.26428	0.174172	7.25882	3.90482e-13	3.9391e-12	ENSNFUG00015010212	slc25a15a
306.414	1.26394	0.223332	5.65947	1.51837e-08	8.2527e-08	ENSNFUG00015005104	fermt3b
470.453	1.26336	0.174464	7.24135	4.44232e-13	4.45509e-12	ENSNFUG00015010180	pld3
745.849	1.26328	0.104963	12.0355	2.31265e-33	1.27054e-31	ENSNFUG00015008684	gla
270.021	1.26309	0.257838	4.89879	9.64305e-07	3.96322e-06	ENSNFUG00015018482	MPEG1
105.756	1.26191	0.299321	4.21592	2.48765e-05	8.11673e-05	ENSNFUG00015004908
157.333	1.25873	0.156745	8.03045	9.71183e-16	1.31851e-14	ENSNFUG00015016681	SYNDIG1L
62.3584	1.2573	0.291324	4.31581	1.59017e-05	5.35093e-05	ENSNFUG00015011976	EVA1A
97.047	1.25729	0.213524	5.88827	3.90259e-09	2.32774e-08	ENSNFUG00015013103	jph1a
83.9508	1.25685	0.199545	6.2986	3.00351e-10	2.10012e-09	ENSNFUG00015011552
446.482	1.25668	0.161098	7.80069	6.15691e-15	7.60293e-14	ENSNFUG00015018284	pabpc4
712.356	1.25543	0.191476	6.55661	5.50447e-11	4.23603e-10	ENSNFUG00015002383
511.543	1.25532	0.154012	8.15081	3.61504e-16	5.12965e-15	ENSNFUG00015006192	pde4bb
76.1705	1.2545	0.220132	5.69887	1.20601e-08	6.67236e-08	ENSNFUG00015016706	RASGRP1
120.753	1.2543	0.228341	5.49311	3.94922e-08	2.02006e-07	ENSNFUG00015020053	srgap3
346.372	1.25389	0.251791	4.97989	6.36196e-07	2.68981e-06	ENSNFUG00015005348	ncf4
890.427	1.25381	0.152579	8.21741	2.07939e-16	3.04934e-15	ENSNFUG00015023532	sftpbb
172.179	1.25332	0.19678	6.36913	1.90107e-10	1.36627e-09	ENSNFUG00015000667
231.104	1.25307	0.174443	7.1833	6.80508e-13	6.63215e-12	ENSNFUG00015015930	zbtb46
409.978	1.25158	0.172517	7.25481	4.02215e-13	4.05313e-12	ENSNFUG00015011547	galns
50.8193	1.24961	0.24274	5.14792	2.63395e-07	1.19056e-06	ENSNFUG00015007971	KIAA1549L
193.247	1.24956	0.320154	3.90298	9.50158e-05	0.000280683	ENSNFUG00015014957	pcdh10b
277.704	1.24807	0.156382	7.98093	1.45238e-15	1.93145e-14	ENSNFUG00015003221	CYP46A1
288.694	1.24676	0.228034	5.46742	4.56643e-08	2.31691e-07	ENSNFUG00015001010	zbtb7c
139.964	1.2466	0.287877	4.33033	1.48884e-05	5.0333e-05	ENSNFUG00015002666	ramp2
144.118	1.24643	0.321311	3.87919	0.000104803	0.000307427	ENSNFUG00015011188	ANPEP
298.389	1.24587	0.132684	9.38979	6.0121e-21	1.36992e-19	ENSNFUG00015006161	tes
89.443	1.24473	0.323473	3.84802	0.000119077	0.000345159	ENSNFUG00015007363	wnt5a
151.134	1.24339	0.18982	6.55039	5.73879e-11	4.40137e-10	ENSNFUG00015023211
314.691	1.24184	0.168641	7.36381	1.78728e-13	1.85664e-12	ENSNFUG00015019081	jmjd7
161.034	1.24168	0.266133	4.66564	3.07652e-06	1.1653e-05	ENSNFUG00015006016	slc7a8a
774.932	1.24114	0.164914	7.52599	5.23218e-14	5.79291e-13	ENSNFUG00015015544	ZBTB14
503.265	1.24023	0.17145	7.23374	4.69871e-13	4.69224e-12	ENSNFUG00015010267	manba
180.043	1.23952	0.188852	6.56341	5.2591e-11	4.05659e-10	ENSNFUG00015011853
62.8945	1.2395	0.205534	6.03063	1.63319e-09	1.02689e-08	ENSNFUG00015025213	EPHB1
296.537	1.23923	0.285589	4.33923	1.42984e-05	4.84865e-05	ENSNFUG00015012095
60.8784	1.23824	0.207976	5.9538	2.61994e-09	1.59464e-08	ENSNFUG00015005190	dnajc6
101.804	1.23757	0.163163	7.58488	3.32808e-14	3.79397e-13	ENSNFUG00015002729	tpbg
111.069	1.23725	0.286959	4.31158	1.6209e-05	5.44751e-05	ENSNFUG00015019006	CYGB
598.858	1.23722	0.165621	7.4702	8.00715e-14	8.68163e-13	ENSNFUG00015006853
83.8513	1.23634	0.194842	6.34535	2.21925e-10	1.57869e-09	ENSNFUG00015022742	nfatc4
1208.7	1.23568	0.131515	9.39574	5.68189e-21	1.29939e-19	ENSNFUG00015007259	pik3c2a
600.244	1.23501	0.238777	5.17224	2.31303e-07	1.05384e-06	ENSNFUG00015021716	fdxr
77.5643	1.23418	0.493687	2.49992	0.0124222	0.023033	ENSNFUG00015012807
1178.05	1.23369	0.129573	9.52117	1.71237e-21	4.1158e-20	ENSNFUG00015016704	tpp1
153.175	1.23353	0.236756	5.21015	1.88687e-07	8.72758e-07	ENSNFUG00015016597	cthrc1b
855.071	1.23292	0.217193	5.6766	1.37396e-08	7.5308e-08	ENSNFUG00015020515	itgb5
256.756	1.23265	0.152811	8.06652	7.23315e-16	9.9345e-15	ENSNFUG00015020401	DENND5B
80.8861	1.23173	0.205221	6.00198	1.94931e-09	1.21031e-08	ENSNFUG00015024798	klf5a
237.304	1.23166	0.133011	9.25988	2.04655e-20	4.46357e-19	ENSNFUG00015021389	dusp12
139.156	1.23147	0.328213	3.75206	0.000175387	0.0004905	ENSNFUG00015007500	kcnk4a
947.722	1.22966	0.163214	7.534	4.92109e-14	5.47744e-13	ENSNFUG00015000673	rbm47
388.702	1.22961	0.172508	7.12786	1.01942e-12	9.73146e-12	ENSNFUG00015013006	pnpla3
97.2065	1.22863	0.176723	6.95229	3.59411e-12	3.18867e-11	ENSNFUG00015025325	trpv4
1226.3	1.22861	0.0934215	13.1513	1.67262e-39	1.29707e-37	ENSNFUG00015017882	PPP2R5A
97.8781	1.22841	0.308821	3.97775	6.95708e-05	0.000210196	ENSNFUG00015005258	etv7
84.5835	1.2279	0.260752	4.70907	2.48847e-06	9.57188e-06	ENSNFUG00015020107	spmap2
141.452	1.22709	0.225467	5.44242	5.25605e-08	2.63979e-07	ENSNFUG00015015922	rorca
319.888	1.22615	0.172631	7.10271	1.22333e-12	1.15899e-11	ENSNFUG00015014505	osgn1
1022.89	1.22588	0.109039	11.2426	2.51968e-29	1.11457e-27	ENSNFUG00015014155	ifi27.7
52.2431	1.22541	0.301352	4.06639	4.77468e-05	0.000148448	ENSNFUG00015019201	mia
766.84	1.22327	0.0862249	14.187	1.10282e-45	1.14184e-43	ENSNFUG00015010746	mmp15b
79.968	1.2231	0.180213	6.787	1.14489e-11	9.55461e-11	ENSNFUG00015005420
109.33	1.22085	0.219085	5.57252	2.51075e-08	1.32158e-07	ENSNFUG00015007047	myo1eb
693.825	1.22081	0.144652	8.43962	3.18375e-17	5.04155e-16	ENSNFUG00015006211	CARMIL1
435.69	1.22012	0.194988	6.25738	3.915e-10	2.69643e-09	ENSNFUG00015009415	LHFPL6
73.3162	1.2191	0.368385	3.3093	0.000935293	0.00224489	ENSNFUG00015000069	hlx1
124.251	1.21562	0.28414	4.27824	1.88375e-05	6.27384e-05	ENSNFUG00015023140	limk1a
195.836	1.21388	0.194258	6.24879	4.1365e-10	2.84483e-09	ENSNFUG00015000574	slc7a7
70.4089	1.2133	0.199229	6.08998	1.12922e-09	7.25505e-09	ENSNFUG00015019432	stx11a
125.422	1.21282	0.172346	7.03716	1.96202e-12	1.80705e-11	ENSNFUG00015022312	cadm2a
249.444	1.21231	0.194687	6.22698	4.75507e-10	3.24654e-09	ENSNFUG00015023693	IQSEC1
535.479	1.21175	0.147253	8.229	1.88777e-16	2.78133e-15	ENSNFUG00015000062	proza
109.591	1.20982	0.277582	4.35844	1.30992e-05	4.47016e-05	ENSNFUG00015019477	C19H9ORF91
1081.87	1.20883	0.199412	6.06197	1.34463e-09	8.5718e-09	ENSNFUG00015020720	zfp36l1a
197.089	1.20777	0.148407	8.13826	4.01014e-16	5.6647e-15	ENSNFUG00015021663	PGPEP1
86.5935	1.20774	0.48329	2.49899	0.0124546	0.0230909	ENSNFUG00015015431	gng13b
878.197	1.20699	0.345285	3.49564	0.000472923	0.00120527	ENSNFUG00015009520	cyp11c1
1769.7	1.20672	0.0935949	12.893	4.92661e-38	3.46407e-36	ENSNFUG00015021355	COMTD1
115.999	1.20523	0.272492	4.42299	9.73458e-06	3.39198e-05	ENSNFUG00015006661	ZNF521
277.866	1.20351	0.134764	8.9305	4.24103e-19	8.27308e-18	ENSNFUG00015018347	dglucy
332.085	1.20185	0.286025	4.20189	2.64692e-05	8.58937e-05	ENSNFUG00015007842	tgfbr3
636.404	1.20157	0.186074	6.45747	1.06464e-10	7.85827e-10	ENSNFUG00015021662	ILK
391.03	1.20138	0.118612	10.1286	4.12345e-24	1.23927e-22	ENSNFUG00015009577	cyp27a3
93.3354	1.20122	0.307196	3.91027	9.21943e-05	0.000273033	ENSNFUG00015016237
72.8765	1.20084	0.209837	5.7227	1.04844e-08	5.8678e-08	ENSNFUG00015000257	sh3pxd2aa
90.1122	1.20038	0.239393	5.01425	5.32412e-07	2.28069e-06	ENSNFUG00015000827	CIITA
102.098	1.20033	0.275878	4.35093	1.3556e-05	4.61268e-05	ENSNFUG00015005689	fgd4a
275.452	1.19942	0.250051	4.7967	1.61303e-06	6.37902e-06	ENSNFUG00015013724	kdr
992.277	1.19896	0.107279	11.1761	5.33896e-29	2.33428e-27	ENSNFUG00015022615	Nfu_g_1_023239
369.45	1.19866	0.188644	6.35406	2.09702e-10	1.49513e-09	ENSNFUG00015008321	dnase1l1
405.944	1.19812	0.130916	9.15177	5.60066e-20	1.1845e-18	ENSNFUG00015014773	ripor2
74.7299	1.19744	0.179777	6.66067	2.72584e-11	2.17836e-10	ENSNFUG00015012852	tmem108
57.5239	1.19726	0.299546	3.99693	6.41695e-05	0.000194939	ENSNFUG00015015774	kcng3
733.817	1.19496	0.0734856	16.2612	1.86058e-59	3.81096e-57	ENSNFUG00015001967	ddr1
433.56	1.19479	0.174183	6.85937	6.91667e-12	5.94606e-11	ENSNFUG00015002752	nudt19
62.1313	1.1943	0.426386	2.80098	0.00509479	0.0103444	ENSNFUG00015017256	cspg5a
787.077	1.19332	0.125703	9.49317	2.24121e-21	5.32577e-20	ENSNFUG00015008945	Nfu_g_1_010791
77.3743	1.19158	0.427761	2.78561	0.00534266	0.0108034	ENSNFUG00015024408	cyp4f3
1346.18	1.19122	0.140698	8.46651	2.52861e-17	4.07257e-16	ENSNFUG00015000508	ctsf
59.7867	1.191	0.421795	2.82365	0.00474802	0.00969987	ENSNFUG00015002022	si:ch211-136a13.1
81.1589	1.19067	0.306186	3.88872	0.000100775	0.000296443	ENSNFUG00015008300	nhsl2
54.2435	1.19014	0.206548	5.76206	8.30927e-09	4.71342e-08	ENSNFUG00015013161	il1rapl2
137.654	1.1896	0.227673	5.22502	1.74136e-07	8.10425e-07	ENSNFUG00015023788	gadd45ba
318.435	1.18905	0.174043	6.83193	8.378e-12	7.12432e-11	ENSNFUG00015013477	rasgrp4
103.618	1.189	0.179138	6.63737	3.19323e-11	2.53574e-10	ENSNFUG00015012961	abi3b
347.234	1.18773	0.236283	5.02674	4.98881e-07	2.14878e-06	ENSNFUG00015022390	gnai3
957.068	1.186	0.0865818	13.6981	1.04256e-42	9.49086e-41	ENSNFUG00015015073	ehd4
298.093	1.18586	0.119894	9.89094	4.55726e-23	1.26104e-21	ENSNFUG00015018566	slc38a6
152.669	1.18509	0.395765	2.99443	0.00274958	0.00593846	ENSNFUG00015002270	ALOXE3
225.254	1.18471	0.322285	3.67596	0.000236955	0.000642658	ENSNFUG00015001881	HS3ST1
427.746	1.18445	0.133	8.90567	5.30666e-19	1.02353e-17	ENSNFUG00015022954	spint1a
148.031	1.18436	0.225677	5.248	1.53758e-07	7.22005e-07	ENSNFUG00015003630	klhl29
63.9293	1.18378	0.2752	4.30154	1.69615e-05	5.6852e-05	ENSNFUG00015023815	nfatc2a
4881.59	1.18353	0.196026	6.0376	1.56424e-09	9.88485e-09	ENSNFUG00015005914	ctsba
338.081	1.18351	0.392403	3.01605	0.00256089	0.00557567	ENSNFUG00015001729	slc8a1a
540.717	1.18322	0.115062	10.2834	8.37452e-25	2.6884e-23	ENSNFUG00015011082	tfr1b
984.693	1.18319	0.3235	3.65746	0.00025473	0.000686421	ENSNFUG00015015773	cebpb
58.335	1.18238	0.18698	6.32354	2.55637e-10	1.80285e-09	ENSNFUG00015018709	gng10
54.3152	1.18119	0.366468	3.22318	0.00126775	0.00295992	ENSNFUG00015023447	gata5
592.508	1.18085	0.139709	8.45224	2.8577e-17	4.55272e-16	ENSNFUG00015020283	poc1bl
133.493	1.17984	0.280106	4.21213	2.52978e-05	8.23619e-05	ENSNFUG00015010037	TLR5
113.821	1.17942	0.265028	4.45017	8.58041e-06	3.01997e-05	ENSNFUG00015001333	tec
1013.61	1.1782	0.114968	10.2481	1.2072e-24	3.84266e-23	ENSNFUG00015023854	slc16a9a
58.7046	1.17775	0.168413	6.99323	2.68624e-12	2.43597e-11	ENSNFUG00015023117	cdh2
1478.35	1.1761	0.172582	6.81475	9.44291e-12	7.98305e-11	ENSNFUG00015022203	ca6
61.1527	1.1752	0.322609	3.64279	0.000269695	0.000723437	ENSNFUG00015024162	BDKRB2
55.9516	1.17445	0.223603	5.25241	1.50119e-07	7.05445e-07	ENSNFUG00015002863	nr3c2
78.0777	1.17413	0.466943	2.5145	0.01192	0.0221738	ENSNFUG00015025143	tifa
79.2644	1.17317	0.177522	6.60856	3.88064e-11	3.04441e-10	ENSNFUG00015003889
831.874	1.17105	0.158129	7.40568	1.30481e-13	1.37362e-12	ENSNFUG00015018396
1692.81	1.1709	0.155168	7.54602	4.48758e-14	5.01863e-13	ENSNFUG00015007917	cast
84.3201	1.17015	0.1781	6.57017	5.02562e-11	3.88923e-10	ENSNFUG00015021792
704.681	1.17004	0.284273	4.11592	3.8564e-05	0.000122155	ENSNFUG00015015866
105.985	1.16945	0.230802	5.06689	4.04365e-07	1.77288e-06	ENSNFUG00015018838	cpt1b
1246.27	1.16901	0.265929	4.39596	1.10285e-05	3.80988e-05	ENSNFUG00015023018	tcn2
313.967	1.16786	0.137173	8.51378	1.6835e-17	2.77065e-16	ENSNFUG00015022438	cmip
63.2529	1.16762	0.255227	4.57484	4.76576e-06	1.75402e-05	ENSNFUG00015006244	ptges
189.762	1.16688	0.356218	3.27576	0.00105377	0.00250218	ENSNFUG00015004780	htra1b
130.771	1.16686	0.327562	3.56224	0.000367705	0.000958371	ENSNFUG00015023415	adgrl3.1
357.533	1.16592	0.116498	10.008	1.40569e-23	4.01955e-22	ENSNFUG00015007381	foxp1b
496.322	1.16434	0.207298	5.61675	1.94585e-08	1.03904e-07	ENSNFUG00015021954	PLXND1
433.506	1.16349	0.108887	10.6853	1.19231e-26	4.4491e-25	ENSNFUG00015005459	parp12a
78.8273	1.16319	0.177223	6.56341	5.25897e-11	4.05659e-10	ENSNFUG00015016323	calcrla
390.952	1.16314	0.137335	8.46938	2.46698e-17	3.98353e-16	ENSNFUG00015019156	ninj1
78.2296	1.16116	0.285272	4.07034	4.69439e-05	0.000146096	ENSNFUG00015004624	myom2a
734.387	1.16079	0.147078	7.89238	2.96472e-15	3.80567e-14	ENSNFUG00015002450	limch1b
1086.84	1.15995	0.179913	6.44726	1.13887e-10	8.35377e-10	ENSNFUG00015023300	nfe2l2a
184.3	1.15909	0.23728	4.8849	1.03479e-06	4.23811e-06	ENSNFUG00015016103
522.563	1.15852	0.169479	6.8358	8.15474e-12	6.94702e-11	ENSNFUG00015004446	WASL
75.6967	1.15655	0.253657	4.55949	5.12771e-06	1.87734e-05	ENSNFUG00015012506
53.672	1.15619	0.35287	3.27653	0.0010509	0.00249567	ENSNFUG00015002179
264.572	1.15611	0.212189	5.44851	5.07947e-08	2.55792e-07	ENSNFUG00015020898	si:ch73-162j3.4
847.218	1.15536	0.258697	4.46608	7.96675e-06	2.81873e-05	ENSNFUG00015015697	myo1ca
633.76	1.15525	0.123581	9.34811	8.92257e-21	2.00402e-19	ENSNFUG00015019510	zgc:136908
566.318	1.15484	0.282711	4.08489	4.40971e-05	0.000138356	ENSNFUG00015012996	ace
245.998	1.15411	0.10712	10.774	4.56906e-27	1.74644e-25	ENSNFUG00015004318	arrdc1b
215.657	1.15363	0.222982	5.17362	2.29601e-07	1.04684e-06	ENSNFUG00015003545	bag2
872.608	1.15349	0.163906	7.03747	1.95765e-12	1.80479e-11	ENSNFUG00015010162	ctsa
168.503	1.14976	0.19829	5.79835	6.697e-09	3.83931e-08	ENSNFUG00015001593
97.8026	1.14944	0.233942	4.91336	8.95289e-07	3.69974e-06	ENSNFUG00015014240	cyth3
319.03	1.14917	0.124148	9.25641	2.1142e-20	4.60046e-19	ENSNFUG00015021552
381.223	1.14812	0.0985509	11.65	2.29406e-31	1.16836e-29	ENSNFUG00015025334	ttyh2
131.738	1.14766	0.187471	6.1218	9.25213e-10	6.03069e-09	ENSNFUG00015009283
290.598	1.14737	0.112279	10.2189	1.63174e-24	5.11622e-23	ENSNFUG00015013751	CHST12
921.831	1.14707	0.195929	5.85453	4.78361e-09	2.80643e-08	ENSNFUG00015016483	cd9a
85.4511	1.14704	0.172001	6.66881	2.57877e-11	2.06873e-10	ENSNFUG00015016062	slc52a2
898.38	1.14515	0.202537	5.654	1.56753e-08	8.50028e-08	ENSNFUG00015017975	hexb
1480.42	1.14419	0.208558	5.48622	4.10631e-08	2.09814e-07	ENSNFUG00015019575
300.546	1.14341	0.153116	7.46759	8.16779e-14	8.84054e-13	ENSNFUG00015002224
91.3973	1.14338	0.192658	5.93478	2.94247e-09	1.77775e-08	ENSNFUG00015019273	cbx8a
288.847	1.14256	0.140716	8.11961	4.67675e-16	6.54745e-15	ENSNFUG00015018030	slc5a6a
83.991	1.14254	0.317799	3.59517	0.000324174	0.000855087	ENSNFUG00015002072	dbndd1
913.938	1.14001	0.307309	3.70966	0.000207539	0.000571263	ENSNFUG00015024962	COL6A2
347.402	1.13994	0.387138	2.94453	0.0032345	0.00687313	ENSNFUG00015017555	PPIAB
287.081	1.13865	0.143105	7.95676	1.76596e-15	2.33038e-14	ENSNFUG00015020775	rhof
277.666	1.13846	0.143096	7.95595	1.77758e-15	2.34407e-14	ENSNFUG00015009420	slc6a8
572.495	1.13821	0.124369	9.15184	5.59725e-20	1.1845e-18	ENSNFUG00015013062
524.799	1.13807	0.0936271	12.1554	5.37076e-34	3.0576e-32	ENSNFUG00015020551	dhcr7
185.55	1.13774	0.147328	7.72247	1.14096e-14	1.37557e-13	ENSNFUG00015013596	ablim2
136.825	1.13712	0.221946	5.1234	3.00077e-07	1.34667e-06	ENSNFUG00015015123
68.0812	1.13705	0.340835	3.33606	0.000849735	0.00206053	ENSNFUG00015009605	rgs18
314.609	1.13699	0.520263	2.18541	0.028859	0.0488256	ENSNFUG00015004639	Nfu_g_1_024366
66.8861	1.1364	0.256277	4.43428	9.23813e-06	3.23095e-05	ENSNFUG00015020176	rassf5
98.3404	1.13609	0.157861	7.19675	6.16664e-13	6.046e-12	ENSNFUG00015018406
746.181	1.13379	0.100855	11.2418	2.54164e-29	1.12165e-27	ENSNFUG00015011071	COX5A
155.887	1.13357	0.177738	6.37776	1.79694e-10	1.29391e-09	ENSNFUG00015010734	zbtb7b
540.96	1.1333	0.154077	7.35543	1.90313e-13	1.96938e-12	ENSNFUG00015019234	phf21b
213.771	1.13111	0.366987	3.08216	0.00205501	0.00457738	ENSNFUG00015022914	cyp1c2
589.978	1.131	0.123469	9.16022	5.17923e-20	1.10155e-18	ENSNFUG00015002739	tspan11
52.7821	1.13067	0.185609	6.09168	1.11732e-09	7.18837e-09	ENSNFUG00015022612	slc4a10b
453.092	1.13029	0.15148	7.46163	8.54591e-14	9.22861e-13	ENSNFUG00015021925
65.0872	1.12999	0.250334	4.51391	6.36434e-06	2.29267e-05	ENSNFUG00015018470	loxl4
268.249	1.12924	0.215367	5.24334	1.57694e-07	7.38831e-07	ENSNFUG00015015289
108.312	1.12887	0.258856	4.361	1.2947e-05	4.42078e-05	ENSNFUG00015002060	syt4
374.969	1.12851	0.225072	5.01398	5.33145e-07	2.28331e-06	ENSNFUG00015011451	sh3pxd2b
213.528	1.1277	0.143666	7.84947	4.1781e-15	5.26636e-14	ENSNFUG00015016904	trim9
166.849	1.12755	0.184387	6.11512	9.64843e-10	6.26949e-09	ENSNFUG00015017619	slc35g1
383.204	1.12537	0.200177	5.62189	1.88881e-08	1.01087e-07	ENSNFUG00015020749	ar
465.178	1.12516	0.201742	5.57721	2.44409e-08	1.28973e-07	ENSNFUG00015021682
372.757	1.12453	0.123621	9.09658	9.32244e-20	1.92412e-18	ENSNFUG00015000291
270.361	1.12358	0.229644	4.89269	9.94684e-07	4.08007e-06	ENSNFUG00015004331	SLC24A1
190.737	1.12326	0.295332	3.80337	0.000142738	0.000407231	ENSNFUG00015008687	cdh4
51.3846	1.1228	0.225279	4.98405	6.22657e-07	2.6373e-06	ENSNFUG00015019870
85.9526	1.1215	0.26188	4.28248	1.84825e-05	6.16215e-05	ENSNFUG00015013302
865.971	1.11953	0.185048	6.04994	1.44896e-09	9.20264e-09	ENSNFUG00015016552	jpt1a
10466.4	1.1188	0.139389	8.02652	1.00279e-15	1.35751e-14	ENSNFUG00015002550
365.409	1.11791	0.0861172	12.9813	1.56172e-38	1.14066e-36	ENSNFUG00015004382	sez6l
53.2114	1.11787	0.240222	4.65348	3.26373e-06	1.23053e-05	ENSNFUG00015011078
524.388	1.11677	0.0975001	11.454	2.24458e-30	1.07081e-28	ENSNFUG00015023551
181.639	1.11613	0.113194	9.8603	6.18648e-23	1.69199e-21	ENSNFUG00015007426	zmynd8
104.539	1.11475	0.2003	5.56541	2.61536e-08	1.37358e-07	ENSNFUG00015022655	KCNC4
217.787	1.11443	0.13976	7.9739	1.53747e-15	2.04028e-14	ENSNFUG00015002372	arhgap24
211.144	1.11397	0.18034	6.17707	6.53026e-10	4.36215e-09	ENSNFUG00015003956	ADM2A
3437.96	1.11276	0.184764	6.02259	1.7165e-09	1.07461e-08	ENSNFUG00015019454	ctss2.1
61.6984	1.11276	0.402558	2.76422	0.00570583	0.0114676	ENSNFUG00015024185	cd81b
88.1972	1.11088	0.171236	6.48741	8.73251e-11	6.52998e-10	ENSNFUG00015022872	tanc2a
346.198	1.11087	0.189363	5.86637	4.45438e-09	2.63129e-08	ENSNFUG00015018952	psmb8a
55.0603	1.11064	0.247611	4.48544	7.27623e-06	2.5934e-05	ENSNFUG00015022926
183.773	1.1099	0.194889	5.69503	1.23354e-08	6.80268e-08	ENSNFUG00015020691	znrf2a
385.077	1.10914	0.266314	4.16477	3.11665e-05	0.000100017	ENSNFUG00015024942	p2rx1
51.169	1.10893	0.236179	4.69531	2.66197e-06	1.01894e-05	ENSNFUG00015004124	Nfu_g_1_007246
60.9922	1.10889	0.226067	4.90514	9.33596e-07	3.8496e-06	ENSNFUG00015005526	ABCC2
620.623	1.10822	0.0871073	12.7225	4.43598e-37	2.94336e-35	ENSNFUG00015009032	jkamp
90.1647	1.10806	0.224317	4.93971	7.82381e-07	3.26249e-06	ENSNFUG00015007934	trib3
1169.38	1.10615	0.0919583	12.0288	2.50747e-33	1.36959e-31	ENSNFUG00015024554	grb7
64.0701	1.10604	0.321021	3.44537	0.000570268	0.00143263	ENSNFUG00015024227	tprg1l
614.029	1.10519	0.0895584	12.3404	5.48804e-35	3.29352e-33	ENSNFUG00015024672
5452.95	1.10467	0.387966	2.84734	0.00440856	0.00907923	ENSNFUG00015021496
115.358	1.1046	0.246073	4.48892	7.15865e-06	2.55391e-05	ENSNFUG00015024874
120.582	1.10437	0.275463	4.00914	6.09404e-05	0.000185759	ENSNFUG00015015775	pitpnc1b
231.154	1.10423	0.295529	3.73647	0.000186621	0.000518608	ENSNFUG00015000476
197.415	1.10376	0.228545	4.82952	1.36862e-06	5.48495e-06	ENSNFUG00015019812	ano10b
185.989	1.1036	0.126179	8.74629	2.20483e-18	4.00268e-17	ENSNFUG00015012672	si:ch211-260e23.9
147.946	1.10191	0.144147	7.64434	2.10023e-14	2.45209e-13	ENSNFUG00015009886	wdsub1
695.053	1.10187	0.225854	4.8787	1.06786e-06	4.36245e-06	ENSNFUG00015011150
469.264	1.10113	0.270451	4.07146	4.67197e-05	0.000145553	ENSNFUG00015008847	cpn1
102.298	1.10095	0.151416	7.27101	3.56799e-13	3.61479e-12	ENSNFUG00015000347	thrap3a
96.1845	1.10057	0.214575	5.12905	2.91206e-07	1.3081e-06	ENSNFUG00015005390
220.482	1.09904	0.379264	2.89783	0.00375757	0.00787276	ENSNFUG00015018343	smtna
81.7774	1.09828	0.166029	6.61498	3.7159e-11	2.92003e-10	ENSNFUG00015014328	svopa
106.349	1.09793	0.218595	5.02267	5.09585e-07	2.18938e-06	ENSNFUG00015001626	tmem88b
165.137	1.09721	0.176057	6.23215	4.60083e-10	3.14808e-09	ENSNFUG00015022773
89.5013	1.09718	0.269222	4.07538	4.59385e-05	0.000143488	ENSNFUG00015004962
257.294	1.09712	0.111844	9.80937	1.02606e-22	2.75037e-21	ENSNFUG00015004238	si:ch211-168f7.5
65.9279	1.09707	0.215534	5.09	3.58062e-07	1.58462e-06	ENSNFUG00015004329
56.5996	1.09617	0.268228	4.08673	4.37505e-05	0.000137314	ENSNFUG00015002570	pstpip1b
256.136	1.09457	0.314345	3.48208	0.000497542	0.00126289	ENSNFUG00015021367	niban1
251.67	1.09365	0.323783	3.37773	0.000730869	0.0017961	ENSNFUG00015005806	arg2
157.921	1.0934	0.199349	5.48482	4.1388e-08	2.11359e-07	ENSNFUG00015024592
146.821	1.09325	0.150521	7.2631	3.78326e-13	3.81852e-12	ENSNFUG00015021465
288.375	1.09301	0.216957	5.03794	4.7057e-07	2.03521e-06	ENSNFUG00015005741	COLEC12
74.5851	1.09137	0.172449	6.32864	2.47331e-10	1.7482e-09	ENSNFUG00015014815
120.125	1.09077	0.1584	6.8862	5.73041e-12	4.96478e-11	ENSNFUG00015017780	LRRC16B
69.7192	1.0903	0.324766	3.35718	0.000787414	0.00192128	ENSNFUG00015006530	tnfsf13b
585.993	1.08989	0.244199	4.46312	8.07746e-06	2.85575e-05	ENSNFUG00015022121	entpd1
187.519	1.0894	0.218729	4.98061	6.33828e-07	2.6816e-06	ENSNFUG00015007776	LAMB1
101.163	1.08922	0.157374	6.92124	4.47715e-12	3.93322e-11	ENSNFUG00015016037	slc17a9b
851.946	1.08818	0.230161	4.72792	2.26827e-06	8.78949e-06	ENSNFUG00015008429	si:ch1073-406l10.2
154.874	1.08726	0.138501	7.85021	4.15344e-15	5.23879e-14	ENSNFUG00015015566	numbl
133.273	1.08723	0.138788	7.83379	4.7339e-15	5.92728e-14	ENSNFUG00015007389	rnf24
90.2635	1.08389	0.24229	4.47352	7.69415e-06	2.72894e-05	ENSNFUG00015006000	nuak2
395.07	1.0837	0.121683	8.90595	5.29325e-19	1.02199e-17	ENSNFUG00015008191	si:ch73-236j9.2
53.3502	1.08172	0.305573	3.53998	0.000400154	0.00103578	ENSNFUG00015000393	eva1ba
686.233	1.08126	0.144807	7.46694	8.2081e-14	8.87398e-13	ENSNFUG00015021987	minpp1a
1384.09	1.07939	0.17796	6.06534	1.31674e-09	8.40538e-09	ENSNFUG00015019688	wt1a
239.525	1.07933	0.105257	10.2542	1.13321e-24	3.61324e-23	ENSNFUG00015008163	klhl5
856.209	1.07767	0.16412	6.56634	5.15655e-11	3.98401e-10	ENSNFUG00015013408	dock9a
250.652	1.07752	0.359781	2.99494	0.00274502	0.00593065	ENSNFUG00015009655	rgs5a
127.486	1.07732	0.205623	5.23927	1.61215e-07	7.54016e-07	ENSNFUG00015003296	lmx1al
380.065	1.07719	0.149735	7.19395	6.29424e-13	6.16149e-12	ENSNFUG00015009635	tmem79a
86.3313	1.07663	0.188079	5.72436	1.03823e-08	5.81236e-08	ENSNFUG00015009866	rhoq
302.168	1.07611	0.182359	5.90105	3.61202e-09	2.16285e-08	ENSNFUG00015011080	zeb2b
986.26	1.07562	0.117784	9.13209	6.71896e-20	1.40524e-18	ENSNFUG00015008829
143.26	1.07486	0.183637	5.85317	4.82291e-09	2.82596e-08	ENSNFUG00015013777
404.978	1.07443	0.203265	5.28585	1.25122e-07	5.95655e-07	ENSNFUG00015002243	AIF1
102.571	1.0734	0.417053	2.57377	0.0100598	0.019029	ENSNFUG00015006764	arhgef3
71.9535	1.07319	0.285817	3.75481	0.000173475	0.000485947	ENSNFUG00015000982	pcdh7b
107.767	1.07306	0.248945	4.31042	1.62942e-05	5.47419e-05	ENSNFUG00015019412
321.558	1.07219	0.302254	3.5473	0.000389203	0.00100938	ENSNFUG00015013219	zgc:64051
221.589	1.07114	0.163368	6.55659	5.50522e-11	4.23603e-10	ENSNFUG00015020318	galnt12
373.613	1.07074	0.259284	4.12962	3.6337e-05	0.000115558	ENSNFUG00015005160	bnc2
165.659	1.07059	0.148648	7.20217	5.92621e-13	5.83152e-12	ENSNFUG00015018408	enpp1
124.81	1.07045	0.29728	3.60084	0.000317196	0.000838674	ENSNFUG00015012691
85.5714	1.06993	0.229531	4.66135	3.14139e-06	1.18773e-05	ENSNFUG00015017054
77.6257	1.0696	0.19025	5.62207	1.88681e-08	1.01037e-07	ENSNFUG00015019057
397.969	1.06873	0.163649	6.53065	6.54857e-11	4.98792e-10	ENSNFUG00015024806	fkbp10b
504.451	1.06865	0.165719	6.44854	1.12936e-10	8.29373e-10	ENSNFUG00015020163	ikbke
349.71	1.06747	0.116129	9.19205	3.85435e-20	8.22552e-19	ENSNFUG00015022567	cpne3
790.337	1.06641	0.16416	6.49614	8.24057e-11	6.17191e-10	ENSNFUG00015005635
69.5451	1.06604	0.275361	3.87144	0.000108196	0.000316298	ENSNFUG00015020644	Nfu_g_1_021288
431.151	1.0649	0.202347	5.26276	1.41909e-07	6.70043e-07	ENSNFUG00015017960	adamts12
378.822	1.06484	0.1932	5.51161	3.55556e-08	1.83313e-07	ENSNFUG00015002378	gjc4a.2
292.722	1.06419	0.157898	6.7397	1.58712e-11	1.30607e-10	ENSNFUG00015005114	adgra2
68.4115	1.06414	0.467848	2.27454	0.0229337	0.0398196	ENSNFUG00015004466
71.2674	1.06391	0.251071	4.23747	2.26048e-05	7.43004e-05	ENSNFUG00015012024	tp53inp1
200.485	1.06388	0.260841	4.07867	4.52936e-05	0.000141685	ENSNFUG00015012080	itga4
246.418	1.06365	0.150317	7.07603	1.48342e-12	1.39072e-11	ENSNFUG00015023561	tor3a
72.1887	1.06349	0.367494	2.89389	0.00380505	0.0079625	ENSNFUG00015019365	tnfrsf19
51.7281	1.0631	0.196497	5.41026	6.29343e-08	3.12252e-07	ENSNFUG00015000446	pctp
1055.88	1.06289	0.168677	6.30132	2.95114e-10	2.06427e-09	ENSNFUG00015004528	B2M
87.3008	1.06259	0.125978	8.43471	3.32025e-17	5.2401e-16	ENSNFUG00015000681
636.658	1.06252	0.207827	5.11255	3.17846e-07	1.41931e-06	ENSNFUG00015021379
96.3708	1.06198	0.216223	4.91148	9.03936e-07	3.73466e-06	ENSNFUG00015020935	cacnb3a
77.0122	1.06179	0.18753	5.66198	1.49639e-08	8.145e-08	ENSNFUG00015008538	zgc:152863
121.743	1.06144	0.176538	6.01252	1.82663e-09	1.13751e-08	ENSNFUG00015012119	slc25a47a
196.391	1.0611	0.204343	5.19272	2.0724e-07	9.53658e-07	ENSNFUG00015024260	dlg1
330.165	1.0605	0.194374	5.45598	4.87035e-08	2.45853e-07	ENSNFUG00015015320
631.425	1.05939	0.181585	5.83409	5.40842e-09	3.14362e-08	ENSNFUG00015022716	mxra8b
879.04	1.05919	0.0888995	11.9145	9.95175e-33	5.29748e-31	ENSNFUG00015004246	ss18l2
193.621	1.05882	0.212614	4.98	6.35842e-07	2.68892e-06	ENSNFUG00015015337
199.882	1.05874	0.267649	3.95573	7.63029e-05	0.000228775	ENSNFUG00015008342	ch25h
330.998	1.05851	0.208815	5.06912	3.9965e-07	1.75507e-06	ENSNFUG00015005919	arhgap42b
53.4483	1.05845	0.190343	5.56073	2.68646e-08	1.4083e-07	ENSNFUG00015004164	PDE2A
512.796	1.05644	0.408406	2.58674	0.00968891	0.0184217	ENSNFUG00015022715	marcksl1a
303.043	1.05527	0.0841409	12.5417	4.41368e-36	2.76317e-34	ENSNFUG00015021528	zgc:77151
638.485	1.05489	0.095426	11.0546	2.08315e-28	8.76225e-27	ENSNFUG00015019286
120.289	1.05454	0.143711	7.33795	2.16889e-13	2.23214e-12	ENSNFUG00015017700	trim36
90.4952	1.05427	0.159121	6.62557	3.45901e-11	2.73298e-10	ENSNFUG00015019224
434.563	1.05367	0.115301	9.13842	6.33719e-20	1.32982e-18	ENSNFUG00015024795	BMPR1BA
217.603	1.05229	0.212892	4.94282	7.70018e-07	3.21307e-06	ENSNFUG00015012343	postna
1166.34	1.05223	0.199327	5.27892	1.29947e-07	6.16653e-07	ENSNFUG00015011765	AXL
120.212	1.05202	0.286442	3.67272	0.000239979	0.000649736	ENSNFUG00015008532	klhl6
549.647	1.05102	0.153949	6.82705	8.66755e-12	7.35396e-11	ENSNFUG00015024575	zgc:153031
274.46	1.05078	0.252138	4.16748	3.0798e-05	9.89358e-05	ENSNFUG00015015180	MAFBB
573.535	1.05056	0.454095	2.31354	0.0206932	0.0363109	ENSNFUG00015023095	col12a1a
134.034	1.04979	0.181652	5.77915	7.50782e-09	4.2807e-08	ENSNFUG00015003194	rab32a
2842.39	1.04939	0.0767112	13.6797	1.34181e-42	1.20981e-40	ENSNFUG00015023246	znfx1
156.447	1.04906	0.203698	5.15007	2.60388e-07	1.17753e-06	ENSNFUG00015004255	gpr75
102.458	1.04798	0.125145	8.37412	5.56372e-17	8.57259e-16	ENSNFUG00015020923
192.499	1.04786	0.149205	7.02293	2.17264e-12	1.99034e-11	ENSNFUG00015018571	reps2
216.118	1.04723	0.187497	5.58532	2.33272e-08	1.23304e-07	ENSNFUG00015025355	gyg1a
620.823	1.04713	0.452152	2.31589	0.0205643	0.0360982	ENSNFUG00015022763
3487.28	1.04689	0.128381	8.15457	3.5042e-16	5.0101e-15	ENSNFUG00015019715	lamb2l
143.73	1.04647	0.322116	3.24873	0.00115921	0.00272847	ENSNFUG00015006035	mal2
640.459	1.04641	0.130831	7.99817	1.26284e-15	1.68893e-14	ENSNFUG00015020255	lxn
175.558	1.04598	0.204607	5.11216	3.18497e-07	1.42188e-06	ENSNFUG00015021006	b4gat1
159.867	1.04595	0.16744	6.24669	4.19242e-10	2.87908e-09	ENSNFUG00015012069	ifngr2
3123.31	1.04585	0.0689758	15.1626	6.25513e-52	8.73124e-50	ENSNFUG00015017275	si:ch73-61d6.3
653.756	1.04583	0.131606	7.94665	1.91622e-15	2.51457e-14	ENSNFUG00015024585
92.9356	1.04527	0.203608	5.13373	2.84062e-07	1.27799e-06	ENSNFUG00015021458	homer3b
327.644	1.04475	0.170821	6.11609	9.58991e-10	6.23361e-09	ENSNFUG00015011275	map3k15
393.769	1.04463	0.28011	3.72935	0.000191977	0.000532393	ENSNFUG00015006049	si:ch211-10a23.2
445.717	1.04421	0.163498	6.38664	1.69566e-10	1.22332e-09	ENSNFUG00015014120	zbtb10
54.8803	1.04407	0.237061	4.40424	1.06157e-05	3.67725e-05	ENSNFUG00015021889	zdhhc23b
90.6557	1.04403	0.174875	5.97015	2.37029e-09	1.45207e-08	ENSNFUG00015024648	unc5ca
152.742	1.0433	0.39354	2.65106	0.00802389	0.015575	ENSNFUG00015007326	TNFAIP2
259.983	1.04324	0.201158	5.18615	2.14686e-07	9.85034e-07	ENSNFUG00015010568	slc12a4
350.228	1.04265	0.310278	3.36037	0.000778384	0.00190117	ENSNFUG00015022441	pex11b
226.372	1.04247	0.148734	7.00892	2.40166e-12	2.19162e-11	ENSNFUG00015024808	ROBO1
87.3002	1.04197	0.19865	5.24524	1.56076e-07	7.31618e-07	ENSNFUG00015018245	rab42a
411.552	1.04187	0.28864	3.60958	0.000306689	0.000813406	ENSNFUG00015020157	csrnp1b
72.753	1.04118	0.306955	3.39195	0.000693977	0.00171326	ENSNFUG00015001188	tmem200a
1645.27	1.04018	0.118382	8.78668	1.54046e-18	2.85431e-17	ENSNFUG00015008917	sult1st6
279.582	1.04003	0.220617	4.71416	2.42715e-06	9.34365e-06	ENSNFUG00015006197	PAK3
87.7119	1.03818	0.237481	4.37164	1.23314e-05	4.22882e-05	ENSNFUG00015005706	zgc:194209
55.5049	1.0381	0.213594	4.86018	1.17278e-06	4.75677e-06	ENSNFUG00015023631	HCN2
286.164	1.0377	0.108915	9.52756	1.61023e-21	3.88516e-20	ENSNFUG00015017492	RAP1GDS1
650.312	1.03745	0.103584	10.0155	1.30293e-23	3.7542e-22	ENSNFUG00015018928
305.227	1.03714	0.233276	4.44598	8.74924e-06	3.07422e-05	ENSNFUG00015010904	angptl1a
66.3817	1.03704	0.323794	3.20276	0.00136116	0.00315572	ENSNFUG00015009332	znf710a
362.74	1.03689	0.254132	4.08012	4.50127e-05	0.000140947	ENSNFUG00015002737	EZH1
430.279	1.03629	0.18813	5.50837	3.62162e-08	1.86617e-07	ENSNFUG00015004230	btg1
494.053	1.03488	0.0877817	11.7892	4.43761e-32	2.31641e-30	ENSNFUG00015020395	tmco3
153.176	1.03476	0.143748	7.19843	6.09096e-13	5.98425e-12	ENSNFUG00015007956	zgc:162255
159.86	1.03414	0.180215	5.73834	9.56107e-09	5.37657e-08	ENSNFUG00015002079	gpr137c
284.205	1.03393	0.245848	4.20556	2.60438e-05	8.45716e-05	ENSNFUG00015024925
111.467	1.03389	0.172729	5.98563	2.15551e-09	1.32871e-08	ENSNFUG00015016019	dnajc11b
339.298	1.03385	0.094602	10.9284	8.42797e-28	3.43017e-26	ENSNFUG00015011209	gipc2
245.026	1.03367	0.248777	4.155	3.25288e-05	0.000104105	ENSNFUG00015017147
274.39	1.03357	0.15257	6.7744	1.24927e-11	1.03981e-10	ENSNFUG00015021267	bnip3la
105.238	1.03315	0.238254	4.33632	1.44887e-05	4.91052e-05	ENSNFUG00015017242	mid1ip1a
227.641	1.03244	0.135208	7.63593	2.24193e-14	2.61106e-13	ENSNFUG00015018718	arsa
225.602	1.03157	0.165652	6.22734	4.74408e-10	3.24021e-09	ENSNFUG00015003945	TSHZ1
271.585	1.03142	0.186776	5.52225	3.34694e-08	1.73173e-07	ENSNFUG00015008170	cnksr1
69.6664	1.03067	0.288928	3.5672	0.00036081	0.000942879	ENSNFUG00015008127	PRR5
3196.81	1.03062	0.0890692	11.571	5.78273e-31	2.89813e-29	ENSNFUG00015007508	itgav
56.4483	1.03048	0.263067	3.91715	8.96007e-05	0.000265561	ENSNFUG00015020241	fgfr3
58.8039	1.03035	0.189762	5.42973	5.64391e-08	2.81583e-07	ENSNFUG00015014449
795.013	1.03012	0.363228	2.83602	0.00456793	0.0093665	ENSNFUG00015004071	fgl2a
51.8802	1.02934	0.42937	2.39733	0.0165153	0.0297499	ENSNFUG00015009558	rgs13a
236.746	1.02928	0.17501	5.88125	4.07168e-09	2.42117e-08	ENSNFUG00015009628	cnnm2b
219.106	1.02928	0.11793	8.72786	2.59539e-18	4.68014e-17	ENSNFUG00015011996	tram2
193.669	1.02885	0.203181	5.06372	4.11149e-07	1.79886e-06	ENSNFUG00015006592
755.097	1.02864	0.0932497	11.031	2.70719e-28	1.12864e-26	ENSNFUG00015014261	Nfu_g_1_007364
57.1322	1.0276	0.244822	4.19736	2.70049e-05	8.74817e-05	ENSNFUG00015013866	LRRN2
218.806	1.02648	0.148419	6.91608	4.64321e-12	4.06772e-11	ENSNFUG00015006926	smpdl3a
264.604	1.02631	0.166053	6.18063	6.38456e-10	4.26937e-09	ENSNFUG00015001052
383.549	1.02587	0.182803	5.61191	2.00106e-08	1.067e-07	ENSNFUG00015021439
538.683	1.02419	0.115443	8.87184	7.19479e-19	1.36123e-17	ENSNFUG00015010867	mst1ra
280.818	1.02395	0.148507	6.89494	5.38877e-12	4.6817e-11	ENSNFUG00015022130	slc6a22.1
151.992	1.023	0.29924	3.41865	0.000629318	0.0015678	ENSNFUG00015009065	gnai2b
257.63	1.02273	0.339125	3.01579	0.00256314	0.00557864	ENSNFUG00015010322
52.7644	1.02153	0.194039	5.26455	1.40535e-07	6.63722e-07	ENSNFUG00015016283	SRPK3
173.416	1.02109	0.22155	4.60886	4.0488e-06	1.50408e-05	ENSNFUG00015001157	akt3a
402.408	1.02066	0.201133	5.07457	3.88378e-07	1.70915e-06	ENSNFUG00015021407	antxr2b
274.747	1.02059	0.189233	5.39332	6.91682e-08	3.41384e-07	ENSNFUG00015019974	arhgef2b
1039.68	1.02057	0.398241	2.5627	0.0103861	0.019601	ENSNFUG00015009007
879.48	1.02049	0.178703	5.71054	1.12618e-08	6.26012e-08	ENSNFUG00015017052	si:ch211-195b13.1
473.922	1.01961	0.157809	6.46102	1.03998e-10	7.69433e-10	ENSNFUG00015007972	rps6ka1
715.139	1.01896	0.0919683	11.0795	1.57759e-28	6.6955e-27	ENSNFUG00015011608	cry2
67.8158	1.01783	0.299427	3.39925	0.000675712	0.00167233	ENSNFUG00015007743	zeb2a
338.026	1.0177	0.276673	3.67834	0.000234753	0.000637418	ENSNFUG00015025133	MYPN
290.019	1.01702	0.187271	5.43075	5.61165e-08	2.80121e-07	ENSNFUG00015001418	MAFG
51.7931	1.01664	0.288266	3.52675	0.000420692	0.00108462	ENSNFUG00015006642	si:ch211-1e14.1
86.7455	1.01651	0.311051	3.26797	0.00108321	0.00256562	ENSNFUG00015009990	thbd
79.5173	1.01595	0.199859	5.08336	3.70826e-07	1.63573e-06	ENSNFUG00015017154	rbms2b
755.24	1.01518	0.117805	8.61752	6.84204e-18	1.18177e-16	ENSNFUG00015021715	THSD1
79.9834	1.01458	0.167916	6.04221	1.52019e-09	9.62907e-09	ENSNFUG00015009617	si:ch211-13k12.2
380.3	1.0142	0.0832621	12.1808	3.93231e-34	2.25916e-32	ENSNFUG00015011335	mef2aa
63.7856	1.01349	0.347959	2.91268	0.00358339	0.00753463	ENSNFUG00015024607
210.476	1.01309	0.123736	8.18755	2.66598e-16	3.83493e-15	ENSNFUG00015004933	pnpla2
101.041	1.01254	0.327905	3.08792	0.00201563	0.00449977	ENSNFUG00015000080	tent5ab
485.746	1.01206	0.243142	4.16243	3.14884e-05	0.000100999	ENSNFUG00015006568	cd151
137.585	1.01201	0.30157	3.3558	0.000791366	0.00192917	ENSNFUG00015009575
95.2956	1.00966	0.178881	5.64433	1.65821e-08	8.94947e-08	ENSNFUG00015002774	zgc:158403
59.0902	1.00934	0.168289	5.99767	2.0017e-09	1.24038e-08	ENSNFUG00015023813	radil2b
1015.21	1.00858	0.123688	8.15421	3.51473e-16	5.02134e-15	ENSNFUG00015006979	phc2a
2094.47	1.00765	0.12658	7.96052	1.71313e-15	2.26541e-14	ENSNFUG00015007763	si:ch211-117c9.5
76.219	1.00756	0.217334	4.636	3.55214e-06	1.33154e-05	ENSNFUG00015022852	mycla
238.514	1.00635	0.218329	4.60931	4.04002e-06	1.50129e-05	ENSNFUG00015015048	bcl6ab
77.5522	1.00516	0.218094	4.60884	4.04913e-06	1.50408e-05	ENSNFUG00015006019	slc22a23
140.846	1.00453	0.168977	5.94476	2.76864e-09	1.67918e-08	ENSNFUG00015001847	lpar2b
78.8431	1.00446	0.306682	3.27524	0.00105572	0.00250649	ENSNFUG00015023967	adgrl4
139.253	1.00436	0.110681	9.07435	1.14363e-19	2.32727e-18	ENSNFUG00015005397	desi2
102.574	1.0039	0.222077	4.52052	6.16891e-06	2.22567e-05	ENSNFUG00015022809	ACSL6
76.6496	1.00333	0.282761	3.54834	0.000387668	0.00100581	ENSNFUG00015004641	fli1
147.963	1.00156	0.156597	6.39577	1.59743e-10	1.15422e-09	ENSNFUG00015010455	p3h4
1645.23	1.00056	0.234405	4.26851	1.96779e-05	6.53307e-05	ENSNFUG00015010724
54.5638	1.0002	0.20892	4.78746	1.68909e-06	6.66439e-06	ENSNFUG00015023917	gpr153
75.8348	1.00019	0.172058	5.81311	6.13236e-09	3.53281e-08	ENSNFUG00015019436	si:dkey-33m11.8
615.212	-1.00199	0.0844591	-11.8636	1.8293e-32	9.68297e-31	ENSNFUG00015016675	pold4
89.18	-1.00427	0.174759	-5.74661	9.10509e-09	5.13702e-08	ENSNFUG00015018318	GPR68
144.207	-1.00455	0.127104	-7.90336	2.71491e-15	3.4969e-14	ENSNFUG00015011189
85.0196	-1.00641	0.198548	-5.06884	4.0025e-07	1.7573e-06	ENSNFUG00015025036	cers6
919.62	-1.00714	0.144532	-6.96831	3.20767e-12	2.87151e-11	ENSNFUG00015003691
323.73	-1.00854	0.185963	-5.42331	5.85038e-08	2.91344e-07	ENSNFUG00015001983
52.6849	-1.00896	0.18584	-5.42918	5.66139e-08	2.8238e-07	ENSNFUG00015008708	immp1l
104.136	-1.01069	0.246189	-4.10533	4.03731e-05	0.000127478	ENSNFUG00015008028	gas1b
574.936	-1.01119	0.107996	-9.36321	7.73472e-21	1.74974e-19	ENSNFUG00015010710
442.731	-1.01172	0.0629917	-16.0612	4.77129e-58	8.72915e-56	ENSNFUG00015006960
261.866	-1.01198	0.104058	-9.72513	2.35603e-22	6.13218e-21	ENSNFUG00015025271	MCOLN3
77.8699	-1.01424	0.185754	-5.46014	4.75756e-08	2.40675e-07	ENSNFUG00015009755
286.382	-1.01448	0.103051	-9.84445	7.24336e-23	1.96677e-21	ENSNFUG00015022883
7102.33	-1.01478	0.104061	-9.75175	1.81308e-22	4.74524e-21	ENSNFUG00015014069	aspm
490.972	-1.01526	0.100669	-10.0852	6.42608e-24	1.88913e-22	ENSNFUG00015015612	CDCA5
2277.09	-1.01597	0.111189	-9.13726	6.40543e-20	1.34265e-18	ENSNFUG00015003543	tmem214
420.144	-1.0161	0.0941128	-10.7966	3.57243e-27	1.37106e-25	ENSNFUG00015011897	pif1
436.199	-1.01662	0.0796242	-12.7677	2.48251e-37	1.69494e-35	ENSNFUG00015006505	MICOS10
586.746	-1.01729	0.0901544	-11.2839	1.5765e-29	7.10705e-28	ENSNFUG00015000566	nudt1
71.9833	-1.01751	0.311439	-3.26712	0.00108647	0.00257237	ENSNFUG00015022270
630.538	-1.01838	0.0968577	-10.5141	7.43495e-26	2.57072e-24	ENSNFUG00015012101	cby1
4895.04	-1.01865	0.110289	-9.23616	2.55494e-20	5.52759e-19	ENSNFUG00015003589	numa1
235.511	-1.01972	0.197017	-5.17578	2.26964e-07	1.03608e-06	ENSNFUG00015023092
228.041	-1.02239	0.126063	-8.1102	5.05358e-16	7.04361e-15	ENSNFUG00015000708	fam78ab
122.921	-1.02476	0.297994	-3.43885	0.000584187	0.00146525	ENSNFUG00015017701	tgfbr2b
147.914	-1.02604	0.125857	-8.15237	3.56846e-16	5.07582e-15	ENSNFUG00015009034
3560.29	-1.02641	0.0485018	-21.1622	2.13066e-99	1.43393e-96	ENSNFUG00015022398	ltn1
1633.48	-1.02699	0.0718833	-14.2868	2.64315e-46	2.8625e-44	ENSNFUG00015004721	timeless
4583.46	-1.02808	0.101613	-10.1177	4.61292e-24	1.37689e-22	ENSNFUG00015009519
482.292	-1.02994	0.13439	-7.66382	1.80482e-14	2.12562e-13	ENSNFUG00015010633	NCOA2
3596.27	-1.03061	0.0671013	-15.359	3.08377e-53	4.61195e-51	ENSNFUG00015018986	kifc1
1155.07	-1.03152	0.0978971	-10.5368	5.84533e-26	2.0512e-24	ENSNFUG00015003710	spo11
2534.06	-1.03162	0.0894113	-11.538	8.49166e-31	4.19992e-29	ENSNFUG00015018979
654.138	-1.03204	0.147588	-6.99268	2.69689e-12	2.44445e-11	ENSNFUG00015004948	poln
1067.46	-1.03207	0.0573107	-18.0083	1.67699e-72	5.54406e-70	ENSNFUG00015014850	brd9
77.1893	-1.03327	0.152678	-6.76765	1.30888e-11	1.08702e-10	ENSNFUG00015017335	frem1a
731.453	-1.03654	0.0935338	-11.082	1.53407e-28	6.54027e-27	ENSNFUG00015023418	meak7
123.929	-1.03658	0.132822	-7.80433	5.98183e-15	7.39158e-14	ENSNFUG00015015279
200.138	-1.03661	0.135575	-7.64605	2.07252e-14	2.42274e-13	ENSNFUG00015022379	lrrc31
412.694	-1.03846	0.131908	-7.87257	3.47422e-15	4.42353e-14	ENSNFUG00015023616
91.4072	-1.03861	0.163507	-6.35208	2.12429e-10	1.51286e-09	ENSNFUG00015016790	rundc3b
421.741	-1.04106	0.0755741	-13.7753	3.58761e-43	3.34678e-41	ENSNFUG00015008325	map2k1
178.734	-1.04244	0.216942	-4.80517	1.54622e-06	6.13796e-06	ENSNFUG00015023123	PHACTR1
1197.27	-1.04274	0.148343	-7.02927	2.0761e-12	1.9056e-11	ENSNFUG00015002421	cdk21
125.462	-1.04355	0.128023	-8.15126	3.60143e-16	5.11419e-15	ENSNFUG00015014068
1450.95	-1.04422	0.172118	-6.06687	1.30428e-09	8.3315e-09	ENSNFUG00015015424	josd2
3431.28	-1.04607	0.0833453	-12.5511	3.92246e-36	2.47207e-34	ENSNFUG00015019692	iqgap3
922.826	-1.04678	0.143103	-7.31488	2.57616e-13	2.63976e-12	ENSNFUG00015000169
2356.75	-1.04825	0.0873513	-12.0004	3.53669e-33	1.92062e-31	ENSNFUG00015020707	med16
70.8476	-1.04871	0.148534	-7.06043	1.65994e-12	1.54316e-11	ENSNFUG00015016125
2186.56	-1.05306	0.119901	-8.78279	1.59472e-18	2.94906e-17	ENSNFUG00015019560	ankmy1
180.659	-1.05516	0.32273	-3.2695	0.00107739	0.00255343	ENSNFUG00015002984
10913.5	-1.05524	0.0933946	-11.2987	1.33126e-29	6.04489e-28	ENSNFUG00015003963
717.016	-1.05664	0.103738	-10.1857	2.29791e-24	7.08705e-23	ENSNFUG00015009887
181.777	-1.05718	0.198099	-5.33661	9.47003e-08	4.57338e-07	ENSNFUG00015016537	MFSD4A
121.515	-1.05967	0.213772	-4.95699	7.1595e-07	3.00677e-06	ENSNFUG00015007918	kiaa0319
236.359	-1.06239	0.150592	-7.05476	1.72896e-12	1.60495e-11	ENSNFUG00015018992	ntaq1
121.084	-1.06338	0.132097	-8.04997	8.28164e-16	1.13333e-14	ENSNFUG00015009202
119.113	-1.06522	0.275947	-3.86022	0.000113284	0.000329585	ENSNFUG00015024321
880.52	-1.06814	0.0810668	-13.176	1.20576e-39	9.46726e-38	ENSNFUG00015012474
285.177	-1.06928	0.107159	-9.97845	1.89398e-23	5.35084e-22	ENSNFUG00015007665	hddc3
1869.81	-1.06955	0.0860017	-12.4364	1.65913e-35	1.02172e-33	ENSNFUG00015003598	fkbp1b
135.268	-1.07046	0.187918	-5.69644	1.22337e-08	6.75452e-08	ENSNFUG00015022282	matn1
5307.55	-1.07067	0.0940425	-11.385	4.96636e-30	2.29378e-28	ENSNFUG00015012416
54.1029	-1.07262	0.198931	-5.39193	6.97041e-08	3.43669e-07	ENSNFUG00015011271
1180.68	-1.07365	0.0645789	-16.6254	4.56585e-62	1.03661e-59	ENSNFUG00015019672
152.393	-1.07595	0.125114	-8.59976	7.9882e-18	1.36925e-16	ENSNFUG00015022623
193.912	-1.07602	0.118221	-9.10176	8.8876e-20	1.8384e-18	ENSNFUG00015013043	crtac1a
321.744	-1.07727	0.115831	-9.30038	1.39943e-20	3.08793e-19	ENSNFUG00015022635
175.456	-1.07859	0.148061	-7.28481	3.22125e-13	3.27583e-12	ENSNFUG00015015675	exoc3l1
432.91	-1.07878	0.0747856	-14.4249	3.60703e-47	4.16999e-45	ENSNFUG00015015748	per3
358.85	-1.08032	0.139168	-7.76273	8.31233e-15	1.01253e-13	ENSNFUG00015013962	OSBPL10
345.132	-1.08092	0.0743199	-14.5441	6.36684e-48	7.64183e-46	ENSNFUG00015008587	mat2al
754.824	-1.08149	0.0972781	-11.1175	1.03149e-28	4.4479e-27	ENSNFUG00015001890	dync2li1
532.028	-1.08203	0.0735275	-14.716	5.09043e-49	6.35259e-47	ENSNFUG00015022779	rrm1
660.921	-1.08277	0.0995808	-10.8733	1.54472e-27	6.14106e-26	ENSNFUG00015012533	mif4gda
117.638	-1.0846	0.138957	-7.80532	5.93488e-15	7.3432e-14	ENSNFUG00015019850	nde1
2261.01	-1.08561	0.151582	-7.16189	7.95705e-13	7.67363e-12	ENSNFUG00015009253	pim2
529.733	-1.08704	0.18201	-5.97245	2.33722e-09	1.43274e-08	ENSNFUG00015018410
714.248	-1.08994	0.0826675	-13.1846	1.07622e-39	8.52902e-38	ENSNFUG00015022508	nemp1
553.672	-1.09137	0.0803231	-13.5872	4.76764e-42	4.15932e-40	ENSNFUG00015013228	msh3
137.158	-1.09205	0.138852	-7.86481	3.69646e-15	4.69697e-14	ENSNFUG00015013018
126.9	-1.09433	0.108017	-10.1311	4.02112e-24	1.21238e-22	ENSNFUG00015024564	etfbkmt
77.9909	-1.09623	0.169408	-6.47096	9.73816e-11	7.2446e-10	ENSNFUG00015011937
346.484	-1.09757	0.29973	-3.66187	0.000250383	0.000675382	ENSNFUG00015000214
1076.83	-1.10187	0.096109	-11.4648	1.98183e-30	9.50268e-29	ENSNFUG00015003061	SRF
1913.47	-1.10584	0.0729375	-15.1615	6.35539e-52	8.80596e-50	ENSNFUG00015025357	hltf
2285.26	-1.10645	0.246512	-4.48844	7.17483e-06	2.5592e-05	ENSNFUG00015011746	si:ch211-214c7.5
890.438	-1.10733	0.234831	-4.71542	2.41214e-06	9.29345e-06	ENSNFUG00015025377	RPF1
1507.96	-1.10858	0.0560891	-19.7646	6.00646e-87	2.97857e-84	ENSNFUG00015016902
894.655	-1.11286	0.146328	-7.60527	2.84317e-14	3.26688e-13	ENSNFUG00015024223	pcsk5b
180.15	-1.11634	0.204523	-5.45824	4.80886e-08	2.42944e-07	ENSNFUG00015012966
72.8515	-1.11714	0.21887	-5.10413	3.32322e-07	1.478e-06	ENSNFUG00015022384	vwa5b2
959.846	-1.11737	0.089961	-12.4206	2.01934e-35	1.23547e-33	ENSNFUG00015015379
1273.13	-1.11745	0.0739851	-15.1037	1.53085e-51	2.09039e-49	ENSNFUG00015025243	CDCA7L
308.913	-1.12054	0.330112	-3.39441	0.000687759	0.00169991	ENSNFUG00015009692	slc22a16
310.512	-1.12136	0.150641	-7.44394	9.77235e-14	1.04098e-12	ENSNFUG00015004173
70.0319	-1.12163	0.325745	-3.44327	0.000574724	0.00144343	ENSNFUG00015008207	dock3
2196.42	-1.12251	0.073651	-15.2409	1.89308e-52	2.70252e-50	ENSNFUG00015023731	emc1
53.2053	-1.12326	0.182822	-6.14402	8.04587e-10	5.29017e-09	ENSNFUG00015019565
9986.54	-1.12786	0.114537	-9.84708	7.05643e-23	1.91878e-21	ENSNFUG00015000738	dzip1
307.354	-1.12962	0.0798261	-14.151	1.84024e-45	1.87446e-43	ENSNFUG00015011903
7552.62	-1.1309	0.0932915	-12.1223	8.05123e-34	4.5154e-32	ENSNFUG00015003523	esco2
809.836	-1.13214	0.0877115	-12.9075	4.08118e-38	2.8912e-36	ENSNFUG00015018710	RANGAP1
149.55	-1.13612	0.106409	-10.6769	1.30506e-26	4.85059e-25	ENSNFUG00015024761
1474.35	-1.1381	0.0820569	-13.8697	9.66716e-44	9.20041e-42	ENSNFUG00015012611	CKMT1A
149.336	-1.13827	0.184575	-6.16696	6.96164e-10	4.63061e-09	ENSNFUG00015012568	pthlha
511.4	-1.1388	0.07608	-14.9685	1.18018e-50	1.57726e-48	ENSNFUG00015021658	timm10b
8932.12	-1.13994	0.129856	-8.77845	1.65742e-18	3.05601e-17	ENSNFUG00015003736	stmn1b
88.5204	-1.14431	0.20668	-5.53661	3.08385e-08	1.60574e-07	ENSNFUG00015015075	NMT1
542.896	-1.14715	0.106433	-10.7782	4.36474e-27	1.67173e-25	ENSNFUG00015017022	nmnat1
407.881	-1.14779	0.0706435	-16.2476	2.32327e-59	4.69699e-57	ENSNFUG00015010615	casp7
144.972	-1.148	0.274424	-4.18331	2.87301e-05	9.27197e-05	ENSNFUG00015016181	eml1
1737.54	-1.1486	0.0651356	-17.634	1.34972e-69	3.85365e-67	ENSNFUG00015022169	pclaf
354.677	-1.14907	0.17487	-6.57101	4.99742e-11	3.87217e-10	ENSNFUG00015005619	lpcat4
74.3133	-1.14971	0.259947	-4.42286	9.74019e-06	3.39331e-05	ENSNFUG00015013505	gstt1a
147.773	-1.15063	0.171393	-6.71342	1.90118e-11	1.54956e-10	ENSNFUG00015012480	slc39a14
52.7393	-1.15437	0.223827	-5.15744	2.50354e-07	1.13542e-06	ENSNFUG00015013210	grm6b
65.1949	-1.15795	0.274847	-4.21309	2.51901e-05	8.20538e-05	ENSNFUG00015019706	cntfr
2765.58	-1.16144	0.0549166	-21.1492	2.80566e-99	1.8231e-96	ENSNFUG00015014927	slbp
133.711	-1.16474	0.288665	-4.03493	5.46185e-05	0.000168257	ENSNFUG00015007766	anxa13l
67.3986	-1.16547	0.163057	-7.1476	8.83052e-13	8.48126e-12	ENSNFUG00015021549	kcnh4a
829.935	-1.16845	0.163503	-7.14638	8.90973e-13	8.55298e-12	ENSNFUG00015006348	serpinh1b
2697.45	-1.16894	0.0739069	-15.8164	2.39729e-56	4.14444e-54	ENSNFUG00015018207
1627.91	-1.17061	0.0962252	-12.1653	4.75452e-34	2.71497e-32	ENSNFUG00015010769	stmn1a
1850.68	-1.1724	0.113904	-10.2928	7.59214e-25	2.46172e-23	ENSNFUG00015022662	gins4
475.003	-1.17327	0.0716958	-16.3646	3.42321e-60	7.33035e-58	ENSNFUG00015015827	ndufaf8
236.707	-1.17596	0.0823655	-14.2774	3.02896e-46	3.26158e-44	ENSNFUG00015022220	acyp1
1728.82	-1.18084	0.0628359	-18.7925	8.70215e-79	3.48901e-76	ENSNFUG00015003093	tmem209
317.068	-1.18232	0.19015	-6.21781	5.04151e-10	3.42597e-09	ENSNFUG00015020967	pou2f2a
2067.2	-1.18342	0.202168	-5.85367	4.80839e-09	2.81921e-08	ENSNFUG00015017208
78.3477	-1.18389	0.26823	-4.4137	1.0162e-05	3.53048e-05	ENSNFUG00015002322	anxa5a
898.004	-1.18478	0.162045	-7.31144	2.64295e-13	2.70672e-12	ENSNFUG00015023898	zgc:173742
237.805	-1.18777	0.211002	-5.62922	1.81025e-08	9.71306e-08	ENSNFUG00015013452	ppa1a
1344.48	-1.18827	0.424511	-2.79914	0.00512394	0.0103957	ENSNFUG00015000788	Metazoa_SRP
109.997	-1.18985	0.165259	-7.19991	6.0253e-13	5.92284e-12	ENSNFUG00015008256	cmtm7
604.445	-1.19117	0.0916053	-13.0033	1.17182e-38	8.69358e-37	ENSNFUG00015016957	smpd5
3064.32	-1.19374	0.200208	-5.96251	2.48393e-09	1.51627e-08	ENSNFUG00015002087	stag3
295.595	-1.19424	0.21374	-5.58733	2.30592e-08	1.22058e-07	ENSNFUG00015014189	jak3
290.093	-1.19674	0.0748136	-15.9963	1.35606e-57	2.43368e-55	ENSNFUG00015013829	ptdss1a
1085.85	-1.19679	0.0641553	-18.6546	1.1589e-77	4.4568e-75	ENSNFUG00015004737	PTPN12
70.6723	-1.19766	0.190885	-6.27422	3.51381e-10	2.43435e-09	ENSNFUG00015021188	tmem182a
293.876	-1.19984	0.0922204	-13.0106	1.06471e-38	7.93019e-37	ENSNFUG00015016972	malsu1
1516.02	-1.20228	0.089835	-13.3832	7.58477e-41	6.32422e-39	ENSNFUG00015002326	rlim
109.727	-1.20484	0.146731	-8.21123	2.18941e-16	3.19824e-15	ENSNFUG00015013652	BX255896.2
91.0714	-1.20677	0.260794	-4.6273	3.70458e-06	1.38483e-05	ENSNFUG00015004077	phox2a
16473	-1.20697	0.0748892	-16.1168	1.94408e-58	3.62714e-56	ENSNFUG00015011529	hsp90aa1.2
18280.6	-1.20875	0.123162	-9.81436	9.76601e-23	2.62152e-21	ENSNFUG00015008832
1060.41	-1.2134	0.249754	-4.8584	1.18338e-06	4.79665e-06	ENSNFUG00015020291	myo10
55.9204	-1.22267	0.16908	-7.23127	4.78496e-13	4.77078e-12	ENSNFUG00015024677
63.219	-1.22618	0.194939	-6.29007	3.17322e-10	2.2114e-09	ENSNFUG00015001669
535.324	-1.22677	0.0930464	-13.1845	1.07722e-39	8.52902e-38	ENSNFUG00015008616	sdk1b
672.588	-1.23186	0.0827216	-14.8916	3.7378e-50	4.89132e-48	ENSNFUG00015005127	EPS15L1
205.789	-1.23296	0.113243	-10.8877	1.31869e-27	5.25356e-26	ENSNFUG00015021654	TUBE1
255.983	-1.23625	0.351671	-3.51538	0.000439131	0.00112723	ENSNFUG00015023156	si:dkey-103j14.5
1303.16	-1.2368	0.0904466	-13.6743	1.44567e-42	1.2911e-40	ENSNFUG00015001348	NDUFB1
1326.42	-1.24395	0.106257	-11.707	1.17349e-31	6.04189e-30	ENSNFUG00015008536	DNAI1
234.801	-1.24444	0.0830681	-14.9809	9.78456e-51	1.317e-48	ENSNFUG00015017357	cracd
377.292	-1.24773	0.196905	-6.33671	2.34729e-10	1.666e-09	ENSNFUG00015016355	abi3a
324.547	-1.24963	0.157126	-7.95303	1.82003e-15	2.39837e-14	ENSNFUG00015010933	SCTR
76.4542	-1.25	0.185741	-6.72979	1.69907e-11	1.3927e-10	ENSNFUG00015009745	brinp3a.2
337.926	-1.25135	0.21092	-5.93284	2.97742e-09	1.79829e-08	ENSNFUG00015013193	dok6
390.615	-1.25655	0.179238	-7.0105	2.37462e-12	2.16904e-11	ENSNFUG00015019655
135.172	-1.2591	0.224239	-5.61498	1.96587e-08	1.04913e-07	ENSNFUG00015006428	CDR2
426.049	-1.26067	0.20571	-6.12836	8.87902e-10	5.80355e-09	ENSNFUG00015002082
367.161	-1.26069	0.115481	-10.9169	9.57098e-28	3.87029e-26	ENSNFUG00015020781	dpm3
2547.96	-1.26195	0.0729195	-17.3061	4.2334e-67	1.13963e-64	ENSNFUG00015007554	kif23
110.912	-1.26256	0.166532	-7.58148	3.41624e-14	3.88273e-13	ENSNFUG00015023118	lhfpl4b
103.349	-1.26335	0.165822	-7.61871	2.56227e-14	2.95854e-13	ENSNFUG00015006943
84.6611	-1.26725	0.195548	-6.48052	9.14088e-11	6.81911e-10	ENSNFUG00015021938	card14
108.145	-1.27171	0.286346	-4.44118	8.94686e-06	3.13606e-05	ENSNFUG00015001315	flt4
3369	-1.27183	0.0766294	-16.5972	7.3032e-62	1.63835e-59	ENSNFUG00015000340
539.807	-1.27216	0.125661	-10.1238	4.33322e-24	1.29817e-22	ENSNFUG00015001166	ABTB2
60.4007	-1.27471	0.276394	-4.61193	3.98951e-06	1.48427e-05	ENSNFUG00015016464	mllt11
2421.53	-1.27667	0.0662169	-19.2801	7.89027e-83	3.62644e-80	ENSNFUG00015004706
312.704	-1.27674	0.270668	-4.71698	2.39376e-06	9.22869e-06	ENSNFUG00015011234
327.768	-1.28038	0.0710214	-18.0281	1.17233e-72	4.16817e-70	ENSNFUG00015011994
343.481	-1.28097	0.154438	-8.29439	1.09141e-16	1.63226e-15	ENSNFUG00015009527	slc25a38b
283.66	-1.28222	0.228659	-5.60759	2.05168e-08	1.09276e-07	ENSNFUG00015005118	sfmbt2
131.93	-1.28457	0.120784	-10.6353	2.04164e-26	7.48495e-25	ENSNFUG00015010296
50.9268	-1.28599	0.418728	-3.07119	0.00213206	0.00472776	ENSNFUG00015023975	ano3
204.274	-1.28788	0.137821	-9.34459	9.22424e-21	2.06194e-19	ENSNFUG00015004750	EFR3B
341.087	-1.2934	0.194639	-6.64511	3.02983e-11	2.41413e-10	ENSNFUG00015021266
62.0953	-1.29415	0.200455	-6.45604	1.07477e-10	7.92683e-10	ENSNFUG00015017262
51.3784	-1.29697	0.198959	-6.51881	7.08675e-11	5.35027e-10	ENSNFUG00015018373	runx1t1
2113.87	-1.29707	0.159176	-8.14864	3.68029e-16	5.21832e-15	ENSNFUG00015000188
754.187	-1.29838	0.0894015	-14.523	8.66374e-48	1.03329e-45	ENSNFUG00015019426	scnm1
52.6435	-1.29921	0.186313	-6.97323	3.09736e-12	2.7754e-11	ENSNFUG00015002143	itga6l
86.6889	-1.3011	0.123752	-10.5137	7.46683e-26	2.57701e-24	ENSNFUG00015003495	scara5
59.5152	-1.30994	0.250882	-5.22135	1.77623e-07	8.25024e-07	ENSNFUG00015013874
132.849	-1.31142	0.215366	-6.08927	1.13428e-09	7.28507e-09	ENSNFUG00015009644	sgsm1b
2801.16	-1.31394	0.0646607	-20.3206	8.46199e-92	4.68993e-89	ENSNFUG00015017455	serf2b
59.0401	-1.31496	0.235825	-5.576	2.46108e-08	1.2974e-07	ENSNFUG00015010035	prdm14
219.394	-1.31563	0.09136	-14.4005	5.13821e-47	5.90393e-45	ENSNFUG00015007471	mboat1
72.5797	-1.31609	0.321304	-4.09609	4.2019e-05	0.00013232	ENSNFUG00015018313	5_8S_rRNA
261.518	-1.31752	0.189151	-6.96544	3.27387e-12	2.92331e-11	ENSNFUG00015002275	P2RY6
111.521	-1.32365	0.17585	-7.52719	5.18453e-14	5.75367e-13	ENSNFUG00015024665
9059.12	-1.33348	0.10169	-13.1132	2.76679e-39	2.11941e-37	ENSNFUG00015000082	ncdn
302.627	-1.33524	0.137483	-9.71203	2.67958e-22	6.94553e-21	ENSNFUG00015005755	gucy2f
53.6314	-1.33687	0.23701	-5.64059	1.69473e-08	9.13486e-08	ENSNFUG00015010448	smad6a
143.892	-1.34059	0.18683	-7.17547	7.20613e-13	6.9888e-12	ENSNFUG00015015508
115.119	-1.34062	0.159547	-8.40266	4.36475e-17	6.82001e-16	ENSNFUG00015022293	si:dkey-266f7.9
7044.9	-1.34141	0.104462	-12.8411	9.65557e-38	6.76392e-36	ENSNFUG00015009830
188.41	-1.342	0.155893	-8.60846	7.40495e-18	1.27433e-16	ENSNFUG00015022021	nox5
132.029	-1.34959	0.201558	-6.69578	2.14517e-11	1.7379e-10	ENSNFUG00015023370
105.735	-1.3499	0.220599	-6.11927	9.40057e-10	6.11687e-09	ENSNFUG00015009721	ADAM11
607.365	-1.35534	0.0795498	-17.0376	4.31842e-65	1.07074e-62	ENSNFUG00015007113
775.214	-1.35672	0.0938797	-14.4516	2.44757e-47	2.88263e-45	ENSNFUG00015007024	ccsapb
864.785	-1.35771	0.188558	-7.2005	5.99914e-13	5.9002e-12	ENSNFUG00015023837
129.866	-1.36337	0.344238	-3.96055	7.47766e-05	0.00022452	ENSNFUG00015004899	CACNG5
12575.2	-1.36633	0.106443	-12.8362	1.0279e-37	7.17395e-36	ENSNFUG00015009793
74.4764	-1.36941	0.427745	-3.20147	0.0013673	0.0031689	ENSNFUG00015024247	add2
65.5921	-1.37414	0.49541	-2.77374	0.00554161	0.011165	ENSNFUG00015013700	hey2
418.218	-1.37494	0.562157	-2.44583	0.0144519	0.0263658	ENSNFUG00015018279
176.334	-1.37546	0.129743	-10.6014	2.93458e-26	1.06345e-24	ENSNFUG00015008043	ncam1a
116.986	-1.38159	0.223491	-6.18187	6.33484e-10	4.23762e-09	ENSNFUG00015019701	mmrn2
474.602	-1.38252	0.0925315	-14.9411	1.7809e-50	2.3468e-48	ENSNFUG00015002874	ELOF1
365.573	-1.38368	0.10082	-13.7242	7.27e-43	6.71549e-41	ENSNFUG00015009955	eaf1
1098.09	-1.38688	0.211666	-6.55224	5.66814e-11	4.3525e-10	ENSNFUG00015002872
3104.55	-1.39215	0.307542	-4.52671	5.99086e-06	2.16891e-05	ENSNFUG00015013665	myot
1016.87	-1.39281	0.199604	-6.97787	2.99682e-12	2.69685e-11	ENSNFUG00015009027
2232.5	-1.39433	0.122672	-11.3663	6.15301e-30	2.80744e-28	ENSNFUG00015016423	ift70
165.604	-1.39527	0.184262	-7.57218	3.67024e-14	4.15138e-13	ENSNFUG00015009396	tnmd
87.5156	-1.3981	0.277038	-5.04661	4.49714e-07	1.95443e-06	ENSNFUG00015016854	si:ch211-76l23.7
135.595	-1.41537	0.155281	-9.1149	7.87402e-20	1.63232e-18	ENSNFUG00015003719	kcnh5a
4463.06	-1.4174	0.1748	-8.10871	5.11582e-16	7.12509e-15	ENSNFUG00015004710	rec8b
1297.88	-1.42194	0.124756	-11.3978	4.2876e-30	1.99495e-28	ENSNFUG00015014151
78.6644	-1.43262	0.232708	-6.15631	7.44576e-10	4.91791e-09	ENSNFUG00015012338
456.68	-1.43965	0.20952	-6.87116	6.36806e-12	5.49449e-11	ENSNFUG00015022043
199.12	-1.44404	0.168822	-8.55365	1.19252e-17	2.00284e-16	ENSNFUG00015011521	dmbx1a
71.7103	-1.4483	0.318749	-4.54371	5.52724e-06	2.01227e-05	ENSNFUG00015016660	evla
72.9348	-1.45119	0.263773	-5.50167	3.76219e-08	1.93016e-07	ENSNFUG00015023703
161.411	-1.46717	0.224801	-6.52653	6.73098e-11	5.11034e-10	ENSNFUG00015016084	ano1a
109.019	-1.46832	0.191191	-7.67986	1.59261e-14	1.88987e-13	ENSNFUG00015011246	SLC25A28
115.956	-1.46881	0.150234	-9.77685	1.41548e-22	3.75152e-21	ENSNFUG00015005484
118.521	-1.47694	0.464873	-3.17708	0.00148768	0.00341792	ENSNFUG00015012371	cxcr4a
74.8397	-1.47871	0.400142	-3.69545	0.000219496	0.000601276	ENSNFUG00015001846	gdpd2
79.7272	-1.48138	0.170919	-8.66715	4.43087e-18	7.83993e-17	ENSNFUG00015003436	cep170bb
91.7092	-1.48326	0.140963	-10.5224	6.81516e-26	2.37384e-24	ENSNFUG00015024329	abcc9
1679.27	-1.48886	0.114292	-13.0268	8.61926e-39	6.47097e-37	ENSNFUG00015009270
1103.89	-1.49461	0.0702226	-21.2839	1.59995e-100	1.11664e-97	ENSNFUG00015016758	cdc45
284.673	-1.49708	0.155319	-9.63872	5.48705e-22	1.38048e-20	ENSNFUG00015011907	brms1
112.666	-1.50392	0.192427	-7.81556	5.47193e-15	6.79716e-14	ENSNFUG00015018745	six6a
2240.95	-1.50637	0.0567837	-26.5283	4.57782e-155	7.84222e-152	ENSNFUG00015023046	tars3
198.966	-1.51221	0.167212	-9.04364	1.51546e-19	3.05754e-18	ENSNFUG00015008009
126.485	-1.52027	0.186953	-8.13187	4.22701e-16	5.94431e-15	ENSNFUG00015012434	PDE1C
164.705	-1.52765	0.174426	-8.75817	1.98438e-18	3.63752e-17	ENSNFUG00015004953	serp2
64.139	-1.52832	0.464577	-3.2897	0.00100294	0.002389	ENSNFUG00015018812	RHEB
510.908	-1.53096	0.151093	-10.1326	3.96049e-24	1.19602e-22	ENSNFUG00015015071
162.114	-1.53742	0.28408	-5.41191	6.23577e-08	3.09718e-07	ENSNFUG00015021536
724.403	-1.55518	0.140815	-11.0441	2.33999e-28	9.79883e-27	ENSNFUG00015019865
486.825	-1.56132	0.0668657	-23.3501	1.3753e-120	1.52448e-117	ENSNFUG00015001826	znf384b
434.417	-1.56277	0.41449	-3.77035	0.000163019	0.000459527	ENSNFUG00015012906	ASB15
1149.48	-1.56467	0.0721373	-21.6902	2.54078e-104	2.08167e-101	ENSNFUG00015011771	fggy
60.8269	-1.57686	0.312629	-5.04386	4.56222e-07	1.98043e-06	ENSNFUG00015000897	zc3h12aa
180.615	-1.57704	0.171694	-9.18519	4.10784e-20	8.75658e-19	ENSNFUG00015024196	RFESD
103.305	-1.59014	0.131059	-12.133	7.06175e-34	3.97229e-32	ENSNFUG00015004565	HIP1R
395.611	-1.59035	0.0920088	-17.2847	6.13287e-67	1.62772e-64	ENSNFUG00015004703	atpsckmt
556.866	-1.59328	0.335815	-4.74452	2.08998e-06	8.13207e-06	ENSNFUG00015022439	snapin
71.9946	-1.5987	0.369494	-4.32672	1.51347e-05	5.11292e-05	ENSNFUG00015025114	neto1
86.2351	-1.60094	0.38064	-4.20592	2.60025e-05	8.44665e-05	ENSNFUG00015020026
2401	-1.60643	0.0888565	-18.0789	4.67081e-73	1.69263e-70	ENSNFUG00015005550	smg6
8483.47	-1.61259	0.104673	-15.406	1.49227e-53	2.26777e-51	ENSNFUG00015004782	smc1b
70.4176	-1.61285	0.254262	-6.34325	2.24961e-10	1.59968e-09	ENSNFUG00015014350
141.079	-1.61533	0.245959	-6.56747	5.11776e-11	3.95728e-10	ENSNFUG00015002347	scg5
448.915	-1.6159	0.28563	-5.65732	1.53759e-08	8.34993e-08	ENSNFUG00015011812
51.9299	-1.61599	0.245911	-6.57147	4.98217e-11	3.86354e-10	ENSNFUG00015005571	nlrc3
62.1401	-1.62618	0.391433	-4.15444	3.26089e-05	0.000104344	ENSNFUG00015001939
226.75	-1.62706	0.125633	-12.951	2.31984e-38	1.67491e-36	ENSNFUG00015009586
4479.67	-1.62819	0.269769	-6.03549	1.58477e-09	1.00011e-08	ENSNFUG00015015253	fam8a1a
716.985	-1.62933	0.0743045	-21.9278	1.41093e-106	1.26607e-103	ENSNFUG00015005975	usp49
141.93	-1.63522	0.19855	-8.23582	1.78336e-16	2.6378e-15	ENSNFUG00015014150	hey1
566.22	-1.63972	0.349195	-4.69572	2.65674e-06	1.01714e-05	ENSNFUG00015024401	alas2
58.3139	-1.65738	0.209076	-7.92719	2.24154e-15	2.91912e-14	ENSNFUG00015015834
1132.61	-1.67197	0.103125	-16.213	4.07932e-59	8.00737e-57	ENSNFUG00015015595
109.439	-1.67704	0.323681	-5.18116	2.20506e-07	1.00928e-06	ENSNFUG00015001295	si:dkey-93h22.7
153.503	-1.68081	0.136614	-12.3033	8.69044e-35	5.18236e-33	ENSNFUG00015011404
54.9279	-1.68301	0.291805	-5.76759	8.04128e-09	4.57242e-08	ENSNFUG00015009658
56.8243	-1.68463	0.342119	-4.92409	8.47522e-07	3.51391e-06	ENSNFUG00015010617
80.7701	-1.6929	0.399231	-4.2404	2.23125e-05	7.34293e-05	ENSNFUG00015016967
58.952	-1.69838	0.251994	-6.73976	1.58644e-11	1.30607e-10	ENSNFUG00015013663	abcc12
64.9977	-1.69916	0.208425	-8.15236	3.56902e-16	5.07582e-15	ENSNFUG00015024416	eya4
90.3322	-1.70299	0.184194	-9.24561	2.3391e-20	5.07811e-19	ENSNFUG00015013380	sqlea
89.2366	-1.70368	0.4294	-3.96758	7.2606e-05	0.000218525	ENSNFUG00015024424	rmrp
66.0534	-1.71513	0.268021	-6.39924	1.56155e-10	1.13133e-09	ENSNFUG00015003476	cacna2d1a
140.73	-1.71528	0.529597	-3.23883	0.00120019	0.0028158	ENSNFUG00015023441
96.1217	-1.73166	0.158207	-10.9455	6.9794e-28	2.84675e-26	ENSNFUG00015013580	itk
56.0171	-1.74442	0.29644	-5.88455	3.99134e-09	2.37714e-08	ENSNFUG00015012268	viml
331.439	-1.7591	0.41434	-4.24555	2.18056e-05	7.18868e-05	ENSNFUG00015017453
4211.04	-1.7723	0.0792743	-22.3565	1.04343e-110	1.03486e-107	ENSNFUG00015017120
97.634	-1.77966	0.413922	-4.2995	1.71187e-05	5.73077e-05	ENSNFUG00015006426	si:dkey-219c10.4
93.2174	-1.7874	0.34673	-5.15501	2.53615e-07	1.1491e-06	ENSNFUG00015017056
76.8406	-1.79108	0.309613	-5.78491	7.25499e-09	4.14533e-08	ENSNFUG00015015368	ace
165.954	-1.79146	0.51624	-3.4702	0.000520067	0.0013144	ENSNFUG00015023113	ank1a
331.604	-1.79307	0.176738	-10.1454	3.47333e-24	1.05227e-22	ENSNFUG00015022713	eogt
275.322	-1.79606	0.131687	-13.6389	2.35129e-42	2.08017e-40	ENSNFUG00015019363	hdhd2
122.208	-1.81544	0.126761	-14.3218	1.59871e-46	1.76176e-44	ENSNFUG00015009805
1536.28	-1.8197	0.14491	-12.5575	3.6155e-36	2.28626e-34	ENSNFUG00015005723	Nfu_g_1_011869
91.9505	-1.83307	0.367732	-4.9848	6.20266e-07	2.62836e-06	ENSNFUG00015012975
236.259	-1.83551	0.183477	-10.0041	1.46257e-23	4.16953e-22	ENSNFUG00015017964
5910.34	-1.83906	0.106174	-17.3212	3.25553e-67	8.89089e-65	ENSNFUG00015013572	dohh
486.263	-1.84487	0.119775	-15.4028	1.567e-53	2.36228e-51	ENSNFUG00015003455	ildr1a
1678.25	-1.84505	0.103039	-17.9064	1.05195e-71	3.35984e-69	ENSNFUG00015012039
76.6097	-1.84879	0.427788	-4.32175	1.54798e-05	5.22013e-05	ENSNFUG00015013998	nt5c2l1
62.4639	-1.85123	0.174246	-10.6242	2.29871e-26	8.37853e-25	ENSNFUG00015013932	hapln3
105.691	-1.87698	0.208829	-8.98811	2.51518e-19	5.01015e-18	ENSNFUG00015014326	cct4
159.583	-1.88192	0.394761	-4.76723	1.86775e-06	7.32788e-06	ENSNFUG00015004958	slc22a2
128.028	-1.88888	0.582553	-3.24242	0.00118521	0.00278515	ENSNFUG00015010426	rgs5b
135.98	-1.89024	0.684282	-2.76237	0.00573831	0.0115258	ENSNFUG00015015450	tp53bp2b
143.696	-1.89656	0.240371	-7.89014	3.01859e-15	3.86691e-14	ENSNFUG00015012388	ace
63.6222	-1.90098	0.790889	-2.40359	0.0162348	0.0293063	ENSNFUG00015007602
1261.27	-1.90388	0.665854	-2.85931	0.00424561	0.00877447	ENSNFUG00015006320	WU:FK11D03
3033.48	-1.90714	0.133296	-14.3076	1.96301e-46	2.15063e-44	ENSNFUG00015013511	hmmr
136.59	-1.91231	0.13405	-14.2656	3.58413e-46	3.83746e-44	ENSNFUG00015013386	ormdl3
113.506	-1.91697	0.214695	-8.92879	4.30699e-19	8.39306e-18	ENSNFUG00015009624
122.017	-1.93088	0.160888	-12.0014	3.49465e-33	1.90327e-31	ENSNFUG00015015806
1630.01	-1.93761	0.357615	-5.41814	6.02235e-08	2.99433e-07	ENSNFUG00015004023	zgc:136929
369.369	-1.94656	0.1098	-17.7282	2.54099e-70	7.60039e-68	ENSNFUG00015020013	ISYNA1
78.0084	-1.94832	0.19047	-10.229	1.47009e-24	4.64806e-23	ENSNFUG00015000372
58.8792	-1.95912	0.524859	-3.73266	0.000189471	0.000525987	ENSNFUG00015015772
144.23	-1.9601	0.335118	-5.84898	4.94585e-09	2.8926e-08	ENSNFUG00015024268	SUSD3
191.908	-1.96388	0.253612	-7.74363	9.66172e-15	1.17009e-13	ENSNFUG00015014774
2743.8	-1.9957	0.0782887	-25.4915	2.4488e-143	3.54962e-140	ENSNFUG00015002985	KIAA1009
70.4075	-2.00233	0.320498	-6.24756	4.16902e-10	2.8651e-09	ENSNFUG00015012578
62.9671	-2.01899	0.268339	-7.52402	5.31178e-14	5.87757e-13	ENSNFUG00015006524	ptger1a
59.615	-2.01937	0.224201	-9.00699	2.11798e-19	4.24136e-18	ENSNFUG00015013295	smpx
299.769	-2.03235	0.473578	-4.29147	1.77493e-05	5.92921e-05	ENSNFUG00015018904	myadma
1206.1	-2.03334	0.127218	-15.9832	1.67423e-57	2.97633e-55	ENSNFUG00015017401
120.526	-2.03768	0.139357	-14.622	2.03372e-48	2.45663e-46	ENSNFUG00015002530
391.904	-2.04486	0.0997599	-20.4978	2.25209e-93	1.28601e-90	ENSNFUG00015006494	myo16
89.1938	-2.0449	0.206857	-9.88557	4.80837e-23	1.32663e-21	ENSNFUG00015002135	arrb1
238.898	-2.04772	0.25475	-8.03817	9.11914e-16	1.2437e-14	ENSNFUG00015003648	adgrb3
1211.06	-2.0592	0.323693	-6.36159	1.9968e-10	1.42962e-09	ENSNFUG00015002946	sec24b
166.816	-2.06107	0.153748	-13.4055	5.61515e-41	4.70275e-39	ENSNFUG00015013095	cdh17
104.992	-2.07128	0.586865	-3.5294	0.000416496	0.00107439	ENSNFUG00015022784
73.2108	-2.07993	0.22929	-9.07118	1.17739e-19	2.3934e-18	ENSNFUG00015010310	BSN
76.1114	-2.09708	0.342126	-6.12955	8.81268e-10	5.76418e-09	ENSNFUG00015023005
1102.89	-2.12293	0.0501126	-42.3631	0	0	ENSNFUG00015010480	kiaa0895l
103.734	-2.14718	0.313308	-6.85326	7.21837e-12	6.18567e-11	ENSNFUG00015006241
2187.36	-2.15885	0.133287	-16.1971	5.29021e-59	1.02772e-56	ENSNFUG00015016696	si:dkey-28b4.8
1098.59	-2.1677	0.122306	-17.7236	2.75822e-70	8.12125e-68	ENSNFUG00015004715	tmem63a
55.1837	-2.17689	0.209169	-10.4073	2.29576e-25	7.68406e-24	ENSNFUG00015006282	tmeff2a
98.8516	-2.1856	0.268126	-8.15137	3.5981e-16	5.11331e-15	ENSNFUG00015020150	MYOM3
54.784	-2.2328	0.280918	-7.94822	1.89206e-15	2.48633e-14	ENSNFUG00015017642	rd3
428.871	-2.24389	0.207676	-10.8047	3.26902e-27	1.26492e-25	ENSNFUG00015024628
90.1694	-2.26525	0.125746	-18.0144	1.50088e-72	5.1423e-70	ENSNFUG00015014245
69.1921	-2.30423	0.250615	-9.19429	3.77488e-20	8.06507e-19	ENSNFUG00015023235	igfbp1b
1155.72	-2.30766	0.624376	-3.69594	0.000219072	0.00060029	ENSNFUG00015018491
124.168	-2.31682	0.225191	-10.2882	7.96303e-25	2.57385e-23	ENSNFUG00015013726
854.583	-2.33172	0.095646	-24.3787	2.87776e-131	3.61524e-128	ENSNFUG00015012166	DFNA5
55.227	-2.33766	0.476441	-4.90649	9.27202e-07	3.82743e-06	ENSNFUG00015002361	si:ch211-113a14.27
1357.73	-2.34485	0.858971	-2.72983	0.00633661	0.0126103	ENSNFUG00015011892	si:ch211-152c8.2
373.043	-2.37042	0.523241	-4.53027	5.89087e-06	2.13558e-05	ENSNFUG00015010138	cahz
121.981	-2.3714	0.168167	-14.1015	3.71895e-45	3.72765e-43	ENSNFUG00015009627
448.686	-2.38103	0.490726	-4.85205	1.22193e-06	4.94228e-06	ENSNFUG00015013077	U1
84.6225	-2.40552	0.24317	-9.89235	4.49349e-23	1.24522e-21	ENSNFUG00015021709	slc22a6l
68.9472	-2.43068	0.514325	-4.72596	2.29035e-06	8.86777e-06	ENSNFUG00015019065	lgals3b
96.9295	-2.44601	0.229829	-10.6427	1.88496e-26	6.924e-25	ENSNFUG00015003385	inpp4b
90.7846	-2.49086	0.210628	-11.8259	2.8675e-32	1.50098e-30	ENSNFUG00015010463
233.155	-2.4916	0.163388	-15.2496	1.65549e-52	2.38138e-50	ENSNFUG00015004846	dtx3
281.655	-2.51482	0.0703639	-35.7403	9.37557e-280	4.41683e-276	ENSNFUG00015019657
79.5557	-2.54669	0.738062	-3.4505	0.000559541	0.0014068	ENSNFUG00015009146	ephb1
138.688	-2.55898	0.189963	-13.4709	2.31866e-41	1.95932e-39	ENSNFUG00015025279	col24a1
57.6812	-2.55921	0.555835	-4.60426	4.13941e-06	1.53459e-05	ENSNFUG00015003853
364.265	-2.58984	0.155722	-16.6312	4.14264e-62	9.51999e-60	ENSNFUG00015014701
439.532	-2.59593	0.138831	-18.6984	5.09998e-78	2.00217e-75	ENSNFUG00015000591	ppm1ka
380.284	-2.59831	0.17027	-15.26	1.41279e-52	2.04789e-50	ENSNFUG00015018740	six4a
314.757	-2.60345	0.218062	-11.939	7.40738e-33	3.95424e-31	ENSNFUG00015008477
117.848	-2.60889	0.441983	-5.90269	3.57628e-09	2.1435e-08	ENSNFUG00015005567
116.692	-2.61297	0.249691	-10.4648	1.25313e-25	4.26244e-24	ENSNFUG00015020031	vipr2
68.5904	-2.61706	0.538125	-4.8633	1.15446e-06	4.69053e-06	ENSNFUG00015017892	mgll
132.782	-2.66994	0.390435	-6.83838	8.00921e-12	6.8323e-11	ENSNFUG00015010934	SLC9A9
118.84	-2.72517	0.555125	-4.90911	9.14885e-07	3.77823e-06	ENSNFUG00015010627
6239.71	-2.74332	0.566165	-4.84545	1.26327e-06	5.09308e-06	ENSNFUG00015007666	Nfu_g_1_007654
110.074	-2.76969	0.187876	-14.7421	3.45914e-49	4.3456e-47	ENSNFUG00015015852
234.494	-2.79707	0.332573	-8.41037	4.08717e-17	6.40754e-16	ENSNFUG00015012972	si:dkey-108k21.21
463.688	-2.81021	0.54005	-5.20362	1.95441e-07	9.02671e-07	ENSNFUG00015001398	slc4a1a
15218.2	-2.83721	0.58793	-4.82576	1.39469e-06	5.58469e-06	ENSNFUG00015007606	ba1l
10950.3	-2.83947	0.587708	-4.83143	1.35553e-06	5.43829e-06	ENSNFUG00015007598	Nfu_g_1_007730
52.5556	-2.85648	0.224895	-12.7014	5.80781e-37	3.81332e-35	ENSNFUG00015010749
191.648	-2.86267	1.28278	-2.23161	0.0256411	0.0439375	ENSNFUG00015022834
255.348	-2.87468	0.335377	-8.57148	1.02164e-17	1.72661e-16	ENSNFUG00015018432	sema3d
954.086	-2.90141	0.468788	-6.18917	6.04805e-10	4.05874e-09	ENSNFUG00015016649
92.866	-2.90646	0.20383	-14.2592	3.92939e-46	4.18336e-44	ENSNFUG00015005543	H2BC6
71.8217	-2.92367	0.355734	-8.21871	2.05707e-16	3.01896e-15	ENSNFUG00015016451	KIF5A
263.041	-2.94666	0.136447	-21.5956	1.97656e-103	1.55193e-100	ENSNFUG00015010833
341.567	-2.97939	0.166358	-17.9094	9.95551e-72	3.23451e-69	ENSNFUG00015003451	loxhd1a
204.453	-3.01373	0.28816	-10.4585	1.33942e-25	4.54776e-24	ENSNFUG00015025196	rbp4l
1687	-3.03147	0.862956	-3.51289	0.000443262	0.00113659	ENSNFUG00015018389	MIB2
340.173	-3.0451	0.10559	-28.8389	6.9891e-183	1.64628e-179	ENSNFUG00015016344	hpcal1
92.8396	-3.04928	0.245625	-12.4143	2.18495e-35	1.32817e-33	ENSNFUG00015015753	pcbd1
204.18	-3.08377	0.279742	-11.0236	2.93928e-28	1.22e-26	ENSNFUG00015003776	notch1a
125.032	-3.08614	0.234338	-13.1696	1.31314e-39	1.02675e-37	ENSNFUG00015010655	cntnap5a
52.2738	-3.08692	0.255662	-12.0742	1.44483e-33	7.98427e-32	ENSNFUG00015009720	si:dkeyp-59c12.1
99.7657	-3.103	0.190086	-16.3242	6.63901e-60	1.40568e-57	ENSNFUG00015003148	nrxn2b
145.829	-3.13361	0.851747	-3.67904	0.00023411	0.000636039	ENSNFUG00015006895	slc17a7b
89.8066	-3.14164	0.229146	-13.7102	8.8214e-43	8.06944e-41	ENSNFUG00015005525	H2BC1
50.2314	-3.3229	0.264487	-12.5636	3.34848e-36	2.13172e-34	ENSNFUG00015014334	rpe65b
65.2552	-3.34994	0.308966	-10.8424	2.16665e-27	8.52367e-26	ENSNFUG00015004804	slc43a3a
99.1812	-3.44397	0.224512	-15.3398	4.14285e-53	6.05178e-51	ENSNFUG00015003434
90.6228	-3.45652	0.179226	-19.2858	7.06448e-83	3.32807e-80	ENSNFUG00015019852	pnp4b
75.6718	-3.45666	0.282731	-12.226	2.25899e-34	1.322e-32	ENSNFUG00015014702
121.379	-3.52496	0.381496	-9.23985	2.46844e-20	5.34659e-19	ENSNFUG00015002366
82.1163	-3.53594	0.219311	-16.123	1.75932e-58	3.31526e-56	ENSNFUG00015014711
82.1688	-3.53776	0.174928	-20.2241	6.01329e-91	3.23755e-88	ENSNFUG00015008452	rhobtb2a
447.588	-3.80292	0.176814	-21.508	1.30899e-102	9.86665e-100	ENSNFUG00015020195
118.245	-3.83613	0.221025	-17.3561	1.77243e-67	4.91173e-65	ENSNFUG00015004451	SLC2A13
336.737	-3.89067	0.459275	-8.47135	2.42572e-17	3.92026e-16	ENSNFUG00015010302
2281.48	-3.94489	0.19705	-20.0198	3.70325e-89	1.88605e-86	ENSNFUG00015023799
85.0503	-3.96089	0.282665	-14.0127	1.30361e-44	1.27281e-42	ENSNFUG00015000907
879.831	-3.97595	0.150303	-26.4529	3.38006e-154	5.30782e-151	ENSNFUG00015022088	spata18
414.584	-3.98479	0.377272	-10.5621	4.46514e-26	1.5816e-24	ENSNFUG00015022411
106.876	-3.9981	0.34595	-11.5569	6.81352e-31	3.39666e-29	ENSNFUG00015001779	elfn2a
160.843	-3.9993	0.319331	-12.524	5.51902e-36	3.44372e-34	ENSNFUG00015013453
68.9718	-4.02045	0.280119	-14.3526	1.02549e-46	1.15026e-44	ENSNFUG00015001417	si:dkey-174m14.3
575.994	-4.03433	0.185469	-21.752	6.61808e-105	5.66869e-102	ENSNFUG00015003146
71.5894	-4.17959	0.403888	-10.3484	4.25658e-25	1.40968e-23	ENSNFUG00015005383	lrrc2
226.469	-4.26768	0.203607	-20.9604	1.50972e-97	9.48302e-95	ENSNFUG00015007833	and2
2555.07	-4.27395	0.276334	-15.4666	5.82845e-54	9.07697e-52	ENSNFUG00015003066	c3b.1
105.74	-4.44009	0.232402	-19.1052	2.28526e-81	1.00147e-78	ENSNFUG00015003141
122.314	-4.48408	0.614203	-7.30066	2.86357e-13	2.9263e-12	ENSNFUG00015005514	dok7b
99.5796	-4.6818	0.232766	-20.1137	5.59744e-90	2.92995e-87	ENSNFUG00015004965	trmo
237.365	-4.94636	0.141807	-34.8808	1.45374e-266	5.47885e-263	ENSNFUG00015009943	PIP5K1C
81.8889	-5.30376	0.66011	-8.03466	9.38392e-16	1.27676e-14	ENSNFUG00015000071	PRSS35
489.497	-5.40162	1.11434	-4.84737	1.25107e-06	5.04929e-06	ENSNFUG00015006249	calml4a
102.15	-5.54311	0.786807	-7.04507	1.85373e-12	1.71402e-11	ENSNFUG00015010184	Nfu_g_1_020056
68.8764	-6.23331	0.791557	-7.87475	3.41422e-15	4.35007e-14	ENSNFUG00015003223	acot22
100.608	-6.64247	0.509765	-13.0304	8.21335e-39	6.1909e-37	ENSNFUG00015004195
95.6116	-8.4292	0.566147	-14.8887	3.90223e-50	5.07129e-48	ENSNFUG00015002222	cryba4
60.2152	-9.77254	0.808914	-12.0811	1.32989e-33	7.37073e-32	ENSNFUG00015023935
98.1566	-10.4936	2.08931	-5.02253	5.09951e-07	2.19045e-06	ENSNFUG00015022589
